# Supplementary material for: Comparative genomic analysis of Lacticaseibacillus paracasei SMN-LBK from koumiss
Source: Front Microbiol. 2022 Oct 18;13:1042117. doi: 10.3389/fmicb.2022.1042117 (PMC9622802; doi:10.3389/fmicb.2022.1042117)
Supplement: Supplementary file 6 [file Table_1.XLSX]

## Sheet: Table. S1--GeneFamily.stat
Supplementary Table 1. Clustering results of gene families of 11 Lactobacillus strains
fam_id	total	Lacticaseibacillus_casei_12A	Lacticaseibacillus_paracasei_ATCC334	Lacticaseibacillus_paracasei_BD_II	Lacticaseibacillus_paracasei_BL23	Lacticaseibacillus_paracasei_LOCK919	Lacticaseibacillus_paracasei_N1115	Lacticaseibacillus_paracasei_SMN_LBK	Lacticaseibacillus_paracasei_W56	Lacticaseibacillus_paracasei_Zhang	Lacticaseibacillus_rhamnosus_GG	Lactiplantibacillus_plantarum_ST_III	spec_num
1	10	1	1	1	1	1	1	1	1	1	1	0	10
2	11	1	1	1	1	1	1	1	1	1	1	1	11
3	20	2	2	2	2	3	2	2	2	0	2	1	10
4	3	0	0	0	0	0	0	0	0	0	0	3	1
5	12	1	1	1	1	1	1	1	1	1	1	2	11
6	11	1	1	1	1	1	1	1	1	1	1	1	11
7	11	1	1	1	1	1	1	1	1	1	1	1	11
8	12	1	1	1	1	1	1	2	1	1	1	1	11
9	11	1	1	1	1	1	1	1	1	1	1	1	11
10	11	1	1	1	1	1	1	1	1	1	1	1	11
11	143	13	10	14	14	14	10	15	14	13	10	16	11
12	9	1	1	1	1	1	1	1	1	1	0	0	9
13	11	1	1	1	1	1	1	1	1	1	1	1	11
14	11	1	1	1	1	1	1	1	1	1	1	1	11
15	11	2	1	1	1	1	2	1	1	0	1	0	9
16	11	1	1	1	1	1	1	1	1	1	1	1	11
17	11	1	1	1	1	1	1	1	1	1	1	1	11
18	11	1	1	1	1	1	1	1	1	1	1	1	11
19	25	3	2	2	2	3	3	2	2	2	3	1	11
20	10	1	1	1	1	1	1	1	1	1	1	0	10
21	11	1	1	1	1	1	1	1	1	1	1	1	11
22	11	1	1	1	1	1	1	1	1	1	1	1	11
23	11	1	1	1	1	1	1	1	1	1	1	1	11
24	16	2	2	1	1	2	1	2	1	2	2	0	10
25	9	0	1	1	1	1	1	1	1	1	1	0	9
26	6	1	0	0	0	2	1	0	0	1	1	0	5
27	11	2	1	1	1	1	1	1	1	1	1	0	10
28	11	1	1	1	1	1	1	1	1	1	1	1	11
29	15	2	0	1	1	2	1	1	1	2	2	2	10
30	11	1	1	1	1	1	1	1	1	1	1	1	11
31	11	1	1	1	1	1	1	1	1	1	1	1	11
32	22	2	2	2	2	2	2	2	2	2	2	2	11
33	20	2	2	2	2	2	2	2	2	2	2	0	10
34	49	3	4	5	5	3	4	4	5	3	4	9	11
35	12	1	1	1	1	1	1	1	2	1	1	1	11
36	11	1	1	1	1	1	1	1	1	1	1	1	11
37	22	2	2	2	2	2	2	2	2	2	2	2	11
38	7	1	0	1	1	1	0	0	1	1	0	1	7
39	46	4	4	4	4	4	4	4	4	4	4	6	11
40	10	1	1	1	1	1	1	1	1	1	1	0	10
41	22	2	2	2	2	2	2	2	2	2	2	2	11
42	11	1	1	1	1	1	1	1	1	1	1	1	11
43	19	2	1	2	2	2	2	2	2	2	1	1	11
44	7	1	0	1	1	1	1	1	0	1	0	0	7
45	71	6	5	7	7	6	6	6	8	6	6	8	11
46	10	1	1	1	1	1	1	1	1	1	1	0	10
47	6	0	0	1	1	0	0	1	1	0	0	2	5
48	33	3	3	3	3	3	3	3	3	3	3	3	11
49	9	1	1	1	1	1	1	1	1	0	1	0	9
50	29	2	2	2	2	2	2	2	2	2	2	9	11
51	31	3	3	3	3	3	3	3	3	3	3	1	11
52	7	0	1	1	1	0	1	2	1	0	0	0	6
53	32	3	3	3	4	3	3	3	3	3	3	1	11
54	11	1	1	1	1	1	1	1	1	1	1	1	11
55	34	3	3	3	3	3	3	3	3	3	3	4	11
56	113	11	10	11	11	11	11	9	11	11	11	6	11
57	12	1	1	1	1	1	1	1	1	1	1	2	11
58	33	3	3	3	3	4	3	3	3	3	3	2	11
59	28	3	2	2	2	4	3	3	2	3	2	2	11
60	16	2	1	1	1	2	1	2	1	2	2	1	11
61	20	2	2	2	2	2	2	2	2	2	0	2	10
62	8	1	0	1	1	1	1	0	1	1	1	0	8
63	15	2	2	1	1	2	1	1	1	2	2	0	10
64	84	8	7	8	8	8	8	9	8	8	7	5	11
65	48	4	4	4	4	4	5	6	5	4	4	4	11
66	11	1	1	1	1	1	1	1	1	1	1	1	11
67	170	16	17	16	16	15	16	15	16	15	15	13	11
68	10	1	1	1	1	1	1	1	1	1	1	0	10
69	29	4	2	2	2	3	3	3	2	3	5	0	10
70	10	1	1	1	1	1	1	1	1	1	1	0	10
71	455	43	40	41	41	46	42	43	41	45	39	34	11
72	250	21	23	23	23	22	24	24	23	22	26	19	11
73	8	0	0	2	2	0	1	1	2	0	0	0	5
74	13	1	1	1	1	1	1	1	1	1	1	3	11
75	11	1	1	1	1	1	1	1	1	1	1	1	11
76	4	0	0	0	0	0	1	1	0	0	2	0	3
77	2	0	1	0	0	0	1	0	0	0	0	0	2
78	20	2	1	2	2	2	1	2	2	2	2	2	11
79	8	1	1	1	1	1	0	1	1	1	0	0	8
80	3	0	0	1	1	0	0	0	1	0	0	0	3
81	10	1	1	1	1	1	1	1	1	1	1	0	10
82	10	1	1	1	1	1	1	1	1	1	1	0	10
83	9	1	1	1	1	1	1	1	1	1	0	0	9
84	11	1	1	1	1	1	1	1	1	1	1	1	11
85	24	2	2	2	2	2	2	2	2	2	2	4	11
86	55	5	5	5	5	5	5	5	5	5	5	5	11
87	10	1	1	1	1	1	1	1	1	1	1	0	10
88	22	2	2	2	2	2	2	2	2	2	2	2	11
89	33	3	3	3	3	3	3	3	3	3	3	3	11
90	31	3	3	3	3	3	2	3	3	3	2	3	11
91	13	1	1	1	1	1	1	1	1	1	3	1	11
92	10	1	1	1	1	1	1	1	1	1	1	0	10
93	20	2	2	2	2	2	2	2	2	2	2	0	10
94	9	1	1	1	1	1	1	1	1	1	0	0	9
95	11	1	1	1	1	1	1	1	1	1	1	1	11
96	10	1	1	1	1	1	1	1	1	1	0	1	10
97	14	1	1	1	1	1	1	2	1	1	2	2	11
98	16	2	0	2	2	2	0	2	2	2	2	0	8
99	4	1	1	0	0	0	0	0	0	1	1	0	4
100	12	1	1	1	1	1	1	1	1	1	1	2	11
101	11	1	1	1	1	1	1	1	1	1	1	1	11
102	8	1	1	1	1	1	0	1	1	1	0	0	8
103	11	1	1	1	1	1	1	1	1	1	1	1	11
104	32	3	3	3	3	3	3	3	3	3	3	2	11
105	98	8	8	8	8	8	8	8	8	8	10	16	11
106	8	1	0	0	0	1	1	1	0	1	2	1	7
107	12	1	1	1	1	1	1	1	1	1	1	2	11
108	14	1	1	2	2	1	1	1	2	1	2	0	10
109	4	1	0	0	0	1	0	0	0	1	0	1	4
110	13	2	1	1	1	2	1	1	1	2	1	0	10
111	10	1	1	1	1	1	1	1	1	1	1	0	10
112	22	2	2	2	2	2	2	2	2	2	2	2	11
113	62	7	4	6	6	7	5	5	6	6	3	7	11
114	3	0	0	0	0	0	1	1	1	0	0	0	3
115	10	1	1	1	1	1	1	1	1	1	1	0	10
116	17	1	1	1	1	1	2	2	1	1	1	5	11
117	22	2	2	2	2	2	2	2	2	2	2	2	11
118	33	3	3	3	3	3	3	3	3	3	3	3	11
119	10	1	1	1	1	1	1	1	1	1	1	0	10
120	4	1	0	0	0	2	0	0	0	1	0	0	3
121	35	2	1	6	6	3	2	4	6	2	2	1	11
122	3	0	0	1	1	0	0	0	1	0	0	0	3
123	4	0	0	1	1	0	0	1	1	0	0	0	4
124	81	6	4	11	11	8	5	9	11	6	6	4	11
125	13	1	1	2	2	1	1	1	3	1	0	0	9
126	11	1	1	1	1	1	1	1	1	1	1	1	11
127	11	1	1	1	1	1	1	1	1	1	1	1	11
128	9	1	1	1	1	1	1	1	1	1	0	0	9
129	44	4	4	4	4	4	4	4	4	4	4	4	11
130	10	1	1	1	1	1	1	1	1	1	1	0	10
131	10	1	1	1	1	1	1	1	1	1	1	0	10
132	11	1	1	1	1	1	1	1	1	1	1	1	11
133	10	1	1	1	1	1	1	1	1	1	1	0	10
134	10	1	1	1	1	1	1	1	1	1	1	0	10
135	11	1	1	1	1	1	1	1	1	1	1	1	11
136	11	1	1	1	1	1	1	1	1	1	1	1	11
137	9	1	1	1	1	1	1	1	1	1	0	0	9
138	11	1	1	1	1	1	1	1	1	1	1	1	11
139	22	2	2	2	2	2	2	2	2	2	2	2	11
140	11	1	1	1	1	1	1	1	1	1	1	1	11
141	11	1	1	1	1	1	1	1	1	1	1	1	11
142	34	3	3	3	3	3	3	3	3	3	3	4	11
143	11	1	1	1	1	1	1	1	1	1	1	1	11
144	12	1	1	1	1	1	1	1	1	1	2	1	11
145	9	1	1	1	1	1	1	1	1	0	1	0	9
146	11	1	1	1	1	1	1	1	1	1	1	1	11
147	22	2	2	2	2	2	2	2	2	2	2	2	11
148	11	1	1	1	1	1	1	1	1	1	1	1	11
149	11	1	1	1	1	1	1	1	1	1	1	1	11
150	25	2	2	2	2	2	2	2	2	2	2	5	11
151	39	4	4	3	3	3	3	3	3	3	4	6	11
152	9	1	1	1	1	1	0	1	1	1	1	0	9
153	10	1	1	1	1	1	1	1	1	1	1	0	10
154	10	1	1	1	1	1	1	1	1	1	1	0	10
155	3	0	1	0	0	0	1	0	1	0	0	0	3
156	11	1	1	1	1	1	1	1	1	1	1	1	11
157	11	1	1	1	1	1	1	1	1	1	1	1	11
158	11	1	1	1	1	1	1	1	1	1	1	1	11
159	20	2	2	2	2	2	2	2	2	2	2	0	10
160	10	1	1	1	1	1	1	1	1	1	1	0	10
161	11	1	1	1	1	1	1	1	1	1	1	1	11
162	9	1	1	1	1	1	1	1	1	1	0	0	9
163	11	1	1	1	1	1	1	1	1	1	1	1	11
164	2	1	0	0	0	0	0	1	0	0	0	0	2
165	12	1	1	1	1	1	1	1	2	1	1	1	11
166	21	2	2	2	2	2	2	2	2	2	2	1	11
167	30	4	2	3	3	3	2	3	4	3	2	1	11
168	67	6	6	6	6	6	6	6	6	6	6	7	11
169	22	2	2	2	2	2	2	2	2	2	2	2	11
170	11	1	1	1	1	1	1	1	1	1	1	1	11
171	11	1	1	1	1	1	1	1	1	1	1	1	11
172	11	1	1	1	1	1	1	1	1	1	1	1	11
173	11	1	1	1	1	1	1	1	1	1	1	1	11
174	10	1	1	1	1	1	1	1	1	1	1	0	10
175	11	1	1	1	1	1	1	1	1	1	1	1	11
176	11	1	1	1	1	1	1	1	1	1	1	1	11
177	11	1	1	1	1	1	1	1	1	1	1	1	11
178	11	1	1	1	1	1	1	1	1	1	1	1	11
179	3	0	0	0	0	0	0	1	0	0	1	1	3
180	12	1	1	1	1	1	1	1	1	1	2	1	11
181	20	2	2	2	2	2	2	2	2	2	2	0	10
182	10	1	1	1	1	1	1	1	1	1	1	0	10
183	10	1	1	1	1	1	1	1	1	1	1	0	10
184	11	1	1	1	1	1	1	1	1	1	1	1	11
185	11	1	1	1	1	1	1	1	1	1	1	1	11
186	5	1	0	1	1	0	0	1	1	0	0	0	5
187	11	1	1	1	1	1	1	1	1	1	1	1	11
188	5	1	0	0	0	1	1	0	0	1	1	0	5
189	11	1	1	1	1	1	1	1	1	1	1	1	11
190	6	2	0	0	0	1	2	1	0	0	0	0	4
191	11	1	1	1	1	1	1	1	1	1	1	1	11
192	9	1	1	1	1	1	1	1	1	1	0	0	9
193	10	1	1	1	1	1	1	1	1	1	1	0	10
194	10	1	1	1	1	1	1	1	1	1	1	0	10
195	47	4	4	4	4	5	6	5	4	4	2	5	11
196	43	4	3	3	3	4	3	4	3	4	4	8	11
197	36	3	3	4	4	3	3	3	4	3	3	3	11
198	10	1	1	1	1	1	1	1	1	1	1	0	10
199	11	1	1	1	1	1	1	1	1	1	1	1	11
200	22	2	2	2	2	2	2	2	2	2	2	2	11
201	7	1	1	1	1	1	0	1	1	0	0	0	7
202	11	1	1	1	1	1	1	1	1	1	1	1	11
203	11	1	1	1	1	1	1	1	1	1	1	1	11
204	10	1	1	1	1	1	1	1	1	1	1	0	10
205	10	1	1	1	1	1	0	2	1	1	1	0	9
206	4	1	0	0	0	1	0	0	0	1	0	1	4
207	13	1	1	2	2	1	2	1	2	1	0	0	9
208	17	2	1	1	2	3	0	2	2	2	1	1	10
209	48	6	3	4	4	7	4	5	4	6	4	1	11
210	18	2	1	2	2	2	0	2	2	1	3	1	10
211	4	0	0	1	1	0	0	1	1	0	0	0	4
212	11	1	1	1	1	1	1	1	1	1	1	1	11
213	3	1	0	0	0	1	0	0	0	1	0	0	3
214	34	3	3	3	3	3	3	3	4	3	3	3	11
215	31	3	3	3	3	3	3	3	3	3	3	1	11
216	10	1	1	1	1	1	1	1	1	1	1	0	10
217	11	1	1	1	1	1	1	1	1	1	1	1	11
218	11	1	1	1	1	1	1	1	1	1	1	1	11
219	20	2	2	2	2	2	2	2	2	2	2	0	10
220	12	2	1	1	1	1	1	1	1	1	2	0	10
221	13	1	2	1	1	2	2	1	1	1	0	1	10
222	9	1	1	1	1	1	1	1	1	1	0	0	9
223	23	2	2	2	2	2	2	2	2	2	2	3	11
224	10	1	1	1	1	1	1	1	1	1	1	0	10
225	22	2	2	2	2	2	2	2	2	2	2	2	11
226	4	1	0	0	0	0	0	0	0	1	2	0	3
227	6	2	1	0	0	1	0	0	0	1	1	0	5
228	22	2	2	2	2	2	2	2	2	2	2	2	11
229	9	1	1	1	1	1	1	1	1	1	0	0	9
230	9	1	1	1	1	1	0	1	1	1	1	0	9
231	9	1	1	1	1	1	0	1	1	1	1	0	9
232	10	1	1	1	1	1	1	1	1	1	1	0	10
233	11	1	1	1	1	1	1	1	1	1	1	1	11
234	22	2	2	2	2	2	2	2	2	2	2	2	11
235	11	1	1	1	1	1	1	1	1	1	1	1	11
236	11	1	1	1	1	1	1	1	1	1	1	1	11
237	10	1	1	1	1	1	1	1	1	1	1	0	10
238	126	12	12	12	12	12	11	12	12	12	12	7	11
239	10	1	1	1	1	1	1	1	1	1	1	0	10
240	21	2	2	2	2	2	2	2	2	2	2	1	11
241	2	0	0	0	0	0	1	0	0	0	0	1	2
242	11	1	1	1	1	1	1	1	1	1	1	1	11
243	11	1	1	1	1	1	1	1	1	1	1	1	11
244	46	4	4	4	4	4	4	4	4	4	4	6	11
245	8	1	0	1	1	1	0	1	1	1	1	0	8
246	11	1	1	1	1	1	1	1	1	1	1	1	11
247	9	1	1	1	1	1	1	1	1	1	0	0	9
248	11	1	1	1	1	1	1	1	1	1	1	1	11
249	21	3	1	1	1	3	1	3	1	3	3	1	11
250	9	1	0	1	1	1	2	1	1	1	0	0	8
251	16	1	1	2	2	1	1	2	2	1	1	2	11
252	12	1	1	1	1	1	1	1	1	1	1	2	11
253	10	1	1	1	1	1	1	1	1	1	1	0	10
254	14	1	1	1	1	1	1	2	1	1	3	1	11
255	11	1	1	1	1	1	1	1	1	1	1	1	11
256	10	1	1	1	1	1	1	1	1	1	1	0	10
257	22	2	2	2	2	2	2	2	2	2	2	2	11
258	20	2	1	2	2	2	1	2	2	2	3	1	11
259	4	0	0	0	0	0	0	0	0	0	1	3	2
260	19	1	3	3	3	1	1	1	3	1	1	1	11
261	2	0	0	0	0	0	0	0	0	0	2	0	1
262	3	1	0	0	0	1	0	0	0	1	0	0	3
263	10	1	1	1	1	1	1	1	1	1	1	0	10
264	21	2	2	2	2	2	1	2	2	2	1	3	11
265	10	1	1	1	1	1	1	1	1	1	1	0	10
266	11	1	1	1	1	1	1	1	1	1	1	1	11
267	11	1	1	1	1	1	1	1	1	1	1	1	11
268	13	2	1	1	1	2	1	1	1	2	1	0	10
269	10	1	1	1	1	1	0	1	1	1	1	1	10
270	3	0	0	0	0	0	1	1	0	0	0	1	3
271	22	2	2	2	2	2	2	2	2	2	2	2	11
272	2	0	0	0	0	0	0	0	0	0	0	2	1
273	4	1	0	0	0	1	1	0	0	1	0	0	4
274	11	1	1	1	1	1	1	1	1	1	1	1	11
275	22	2	2	2	2	2	2	2	2	2	2	2	11
276	10	1	1	1	1	1	1	1	1	1	1	0	10
277	10	1	1	1	1	1	1	1	1	1	1	0	10
278	21	3	1	2	2	2	2	2	2	2	2	1	11
279	21	2	2	2	2	2	2	2	2	2	2	1	11
280	24	2	2	2	2	2	3	3	2	2	2	2	11
281	12	1	2	1	1	1	1	1	1	1	1	1	11
282	21	2	2	2	2	2	2	2	2	2	2	1	11
283	11	1	1	1	1	1	1	1	1	1	1	1	11
284	20	2	1	2	2	2	2	2	2	2	2	1	11
285	7	1	1	1	1	1	1	0	0	1	0	0	7
286	3	1	0	0	0	1	0	0	0	1	0	0	3
287	12	1	1	1	1	1	1	1	1	1	1	2	11
288	10	1	1	1	1	1	1	1	1	1	1	0	10
289	11	1	1	1	1	1	1	1	1	1	1	1	11
290	2	1	1	0	0	0	0	0	0	0	0	0	2
291	2	1	0	0	0	0	1	0	0	0	0	0	2
292	11	1	1	1	1	1	1	1	1	1	1	1	11
293	13	1	1	1	1	1	1	1	1	1	1	3	11
294	27	2	2	2	2	2	2	2	2	2	2	7	11
295	20	2	2	2	2	2	2	2	2	2	1	1	11
296	9	1	1	1	1	1	0	1	1	1	1	0	9
297	11	1	1	1	1	1	1	1	1	1	1	1	11
298	41	4	4	4	4	4	4	4	4	4	2	3	11
299	11	1	1	1	1	1	1	1	1	1	1	1	11
300	35	3	3	3	3	3	3	3	3	3	2	6	11
301	69	6	6	6	6	7	5	6	6	6	6	9	11
302	11	1	1	1	1	1	1	1	1	1	1	1	11
303	10	1	1	1	1	1	1	1	1	1	1	0	10
304	10	1	1	1	1	1	1	1	1	1	1	0	10
305	89	9	5	9	9	10	6	10	9	9	8	5	11
306	11	1	1	1	1	1	1	1	1	1	1	1	11
307	11	1	1	1	1	1	1	1	1	1	1	1	11
308	11	1	1	1	1	1	1	1	1	1	2	0	10
309	10	1	1	1	1	1	1	1	1	1	1	0	10
310	100	9	9	10	10	9	8	10	10	9	9	7	11
311	69	6	6	6	6	6	6	6	6	6	7	8	11
312	9	1	1	1	1	1	1	1	1	1	0	0	9
313	10	1	1	1	1	1	1	1	1	1	1	0	10
314	10	1	1	1	1	1	1	1	1	1	1	0	10
315	9	1	1	1	1	1	1	1	1	1	0	0	9
316	10	1	1	1	1	1	1	1	1	1	1	0	10
317	11	1	1	1	1	1	1	1	1	1	1	1	11
318	9	1	1	1	1	1	0	1	1	1	1	0	9
319	70	6	7	6	6	8	6	6	6	6	5	8	11
320	17	1	1	2	2	1	1	2	2	1	1	3	11
321	3	0	0	0	0	0	0	0	0	0	0	3	1
322	11	1	1	1	1	1	1	1	1	1	1	1	11
323	76	7	5	8	8	8	9	7	8	7	7	2	11
324	11	1	1	1	1	1	2	1	1	1	1	0	10
325	37	4	3	3	3	4	4	4	3	4	2	3	11
326	23	2	2	2	2	2	2	2	2	2	2	3	11
327	11	1	1	1	1	1	1	1	1	1	1	1	11
328	11	1	1	1	1	1	1	1	1	1	1	1	11
329	11	1	1	1	1	1	1	1	1	1	1	1	11
330	11	1	1	1	1	1	1	1	1	1	1	1	11
331	11	1	1	1	1	1	1	1	1	1	1	1	11
332	10	1	1	1	1	1	1	1	1	1	1	0	10
333	22	2	2	2	2	2	2	2	2	2	2	2	11
334	10	1	1	1	1	1	1	1	1	1	1	0	10
335	10	1	1	1	1	1	1	1	1	1	1	0	10
336	10	1	1	1	1	1	1	1	1	1	1	0	10
337	11	1	1	1	1	1	1	1	1	1	1	1	11
338	11	1	1	1	1	1	1	1	1	1	1	1	11
339	10	1	1	1	1	1	1	1	1	1	1	0	10
340	10	1	1	1	1	1	1	1	1	1	1	0	10
341	31	4	2	2	3	5	1	3	3	4	3	1	11
342	10	1	1	1	1	1	1	1	1	1	1	0	10
343	11	1	1	1	1	1	1	1	1	1	1	1	11
344	19	2	2	2	2	2	2	2	2	2	1	0	10
345	10	1	1	1	1	1	1	1	1	1	1	0	10
346	11	1	1	1	1	1	1	1	1	1	1	1	11
347	21	2	2	2	2	2	2	3	2	3	1	0	10
348	10	1	1	1	1	1	1	1	1	1	1	0	10
349	7	1	1	0	1	1	0	1	1	0	1	0	7
350	11	1	1	1	1	1	1	1	1	1	1	1	11
351	45	4	4	4	4	4	4	5	4	4	4	4	11
352	13	1	1	2	2	1	1	1	2	1	1	0	10
353	10	1	1	1	1	1	1	1	1	1	1	0	10
354	20	2	2	2	2	2	2	2	2	2	2	0	10
355	11	1	1	1	1	1	1	2	1	1	1	0	10
356	10	1	1	1	1	1	1	1	1	1	1	0	10
357	10	1	1	1	1	1	1	1	1	1	1	0	10
358	10	1	1	1	1	1	1	1	1	1	1	0	10
359	11	1	1	1	1	1	1	1	1	1	1	1	11
360	28	4	1	2	2	6	2	3	2	4	2	0	10
361	9	1	0	1	1	1	0	1	1	1	2	0	8
362	11	1	1	1	1	1	1	1	1	1	1	1	11
363	11	1	1	1	1	1	1	1	1	1	1	1	11
364	11	1	1	1	1	1	1	1	1	1	1	1	11
365	10	1	1	1	1	1	1	1	1	1	1	0	10
366	16	2	1	1	1	2	1	2	1	2	1	2	11
367	22	2	2	2	2	2	2	2	2	2	2	2	11
368	11	1	1	1	1	1	1	1	1	1	1	1	11
369	11	1	1	1	1	1	1	1	1	1	1	1	11
370	11	1	1	1	1	1	1	1	1	1	1	1	11
371	11	1	1	1	1	1	1	1	1	1	1	1	11
372	34	3	3	3	3	3	3	3	4	3	3	3	11
373	8	1	1	1	1	1	1	0	1	0	1	0	8
374	67	5	4	6	6	6	7	5	6	4	7	11	11
375	11	1	1	1	1	1	1	1	1	1	1	1	11
376	10	1	1	1	1	1	1	1	1	1	1	0	10
377	11	1	1	1	1	1	1	1	1	1	1	1	11
378	2	1	1	0	0	0	0	0	0	0	0	0	2
379	13	1	2	1	1	1	0	2	1	1	1	2	10
380	59	4	6	4	4	7	5	6	4	5	5	9	11
381	18	1	2	2	2	1	0	4	2	1	1	2	10
382	11	1	1	1	1	1	1	1	1	1	0	2	10
383	14	1	1	1	1	1	1	1	1	1	1	4	11
384	11	1	1	1	1	1	1	1	1	1	1	1	11
385	10	1	1	1	1	1	1	1	1	1	0	1	10
386	14	1	1	2	2	1	1	1	2	1	1	1	11
387	2	1	0	0	0	0	0	0	0	0	1	0	2
388	11	1	1	1	1	1	1	1	1	1	2	0	10
389	10	1	1	1	1	1	1	1	1	1	1	0	10
390	10	1	1	1	1	1	2	1	1	1	0	0	9
391	8	1	1	1	1	1	0	1	1	1	0	0	8
392	12	1	1	1	1	1	1	1	1	1	1	2	11
393	10	1	1	0	0	2	1	2	0	2	1	0	7
394	21	3	2	2	2	2	2	2	2	2	2	0	10
395	9	2	1	0	0	2	1	0	0	1	2	0	6
396	11	1	1	1	1	1	1	1	1	1	1	1	11
397	11	1	1	1	1	1	1	1	1	1	1	1	11
398	11	1	1	1	1	1	1	1	1	1	1	1	11
399	8	1	1	1	1	1	0	1	1	1	0	0	8
400	11	1	1	1	1	1	2	1	1	1	1	0	10
401	11	1	0	1	1	1	2	1	1	1	1	1	10
402	11	1	1	1	1	1	1	1	1	1	1	1	11
403	10	1	1	1	1	1	1	1	1	1	1	0	10
404	11	1	1	1	1	1	1	1	1	1	1	1	11
405	11	1	1	1	1	1	1	1	1	1	1	1	11
406	11	1	1	1	1	1	1	1	1	1	1	1	11
407	8	1	0	1	1	2	2	0	1	0	0	0	6
408	12	2	1	1	1	1	1	1	1	1	1	1	11
409	35	4	4	3	3	3	3	3	3	3	4	2	11
410	12	1	2	1	1	2	1	1	1	1	0	1	10
411	23	3	2	2	2	2	2	2	2	2	2	2	11
412	20	2	2	2	2	2	2	2	2	2	1	1	11
413	23	2	3	2	2	3	3	3	2	2	1	0	10
414	26	3	2	2	2	3	3	3	2	3	2	1	11
415	8	0	1	1	1	1	0	0	2	0	2	0	6
416	2	0	0	0	0	0	0	0	0	0	0	2	1
417	11	1	1	1	1	1	1	1	1	1	1	1	11
418	40	3	4	4	4	3	3	3	4	3	4	5	11
419	11	1	1	1	1	1	1	1	1	1	1	1	11
420	10	1	1	1	1	1	1	1	1	1	1	0	10
421	11	1	1	1	1	1	1	1	1	1	1	1	11
422	13	1	1	1	1	1	1	1	1	1	1	3	11
423	9	1	1	1	1	1	1	1	1	0	1	0	9
424	11	1	1	1	1	2	1	1	1	0	1	1	10
425	11	1	1	1	1	1	1	1	1	1	1	1	11
426	11	1	1	1	1	1	1	1	1	1	1	1	11
427	92	14	11	2	2	8	17	9	2	16	0	11	10
428	12	1	3	2	2	1	0	0	2	0	0	1	7
429	12	1	1	1	1	1	1	1	1	1	1	2	11
430	15	1	2	2	2	1	1	1	2	1	1	1	11
431	11	1	1	1	1	1	2	1	1	1	1	0	10
432	10	1	1	1	1	1	1	1	1	1	1	0	10
433	12	1	1	1	1	1	1	1	1	1	1	2	11
434	11	1	1	1	1	1	1	1	1	1	1	1	11
435	10	1	1	1	1	1	1	1	1	1	1	0	10
436	10	1	1	1	1	1	1	1	1	1	1	0	10
437	22	2	2	2	2	2	2	2	2	2	2	2	11
438	33	3	3	3	3	3	3	3	3	3	3	3	11
439	11	1	1	1	1	1	1	1	1	1	1	1	11
440	11	1	1	1	1	1	1	1	1	1	1	1	11
441	9	0	0	2	2	1	1	0	2	0	0	1	6
442	33	3	3	3	3	3	3	3	3	3	3	3	11
443	11	1	1	1	1	1	1	1	1	1	1	1	11
444	35	3	3	3	3	3	3	3	3	3	4	4	11
445	14	1	1	1	1	1	1	1	1	1	1	4	11
446	11	1	1	1	1	1	1	1	1	1	1	1	11
447	10	1	1	1	1	1	1	1	1	1	1	0	10
448	11	1	1	1	1	1	1	2	1	1	1	0	10
449	9	1	1	1	1	1	1	1	1	1	0	0	9
450	11	1	1	1	1	1	1	1	1	1	1	1	11
451	11	1	1	1	1	1	1	1	1	1	1	1	11
452	3	0	0	0	0	0	0	0	0	0	0	3	1
453	11	1	1	1	1	1	1	1	1	1	1	1	11
454	11	1	1	1	1	1	1	1	1	1	1	1	11
455	11	1	1	1	1	1	1	1	1	1	1	1	11
456	26	2	2	2	2	2	2	2	2	2	2	6	11
457	38	3	4	4	4	3	4	3	4	3	3	3	11
458	12	1	1	2	1	1	1	1	1	1	1	1	11
459	11	1	1	1	1	1	1	1	1	1	1	1	11
460	11	1	1	1	1	1	1	1	1	1	1	1	11
461	33	3	3	3	3	3	3	3	3	3	3	3	11
462	22	2	2	2	2	2	2	2	2	2	2	2	11
463	10	1	1	1	1	1	1	1	1	1	1	0	10
464	10	1	1	1	1	1	1	1	1	1	1	0	10
465	72	3	7	7	7	9	9	10	7	5	7	1	11
466	6	1	3	0	0	0	2	0	0	0	0	0	3
467	4	0	4	0	0	0	0	0	0	0	0	0	1
468	7	1	1	1	1	1	1	0	1	0	0	0	7
469	11	1	1	1	1	1	1	1	1	1	1	1	11
470	11	1	1	1	1	1	1	1	1	1	1	1	11
471	11	1	1	1	1	1	1	1	1	1	1	1	11
472	11	1	1	1	1	1	1	1	1	1	1	1	11
473	20	2	1	2	2	2	2	2	2	2	2	1	11
474	9	1	1	1	1	1	1	1	1	1	0	0	9
475	11	1	1	1	1	1	1	1	1	1	1	1	11
476	9	1	1	1	1	1	1	1	1	1	0	0	9
477	88	7	5	10	10	8	6	8	10	7	8	9	11
478	3	0	0	1	1	0	0	0	1	0	0	0	3
479	6	0	0	1	1	0	0	1	1	0	1	1	6
480	11	1	1	1	1	1	1	1	1	1	1	1	11
481	11	1	1	1	1	1	1	1	2	1	1	0	10
482	22	2	2	2	2	2	2	2	2	2	2	2	11
483	10	1	1	1	1	1	1	1	1	1	1	0	10
484	24	2	2	3	3	1	2	3	3	1	3	1	11
485	31	2	2	4	4	5	2	2	4	2	1	3	11
486	21	2	2	2	2	2	2	2	2	2	2	1	11
487	13	1	1	1	1	1	1	1	1	1	1	3	11
488	5	1	0	0	0	1	1	1	0	1	0	0	5
489	10	1	1	1	1	1	1	1	1	1	1	0	10
490	13	1	1	1	1	2	1	1	1	2	1	1	11
491	21	2	2	2	2	2	2	2	2	2	2	1	11
492	10	1	1	1	1	1	1	1	1	1	1	0	10
493	23	2	3	2	2	2	2	2	2	2	2	2	11
494	4	1	0	1	1	0	0	0	1	0	0	0	4
495	11	1	1	1	1	1	1	1	1	1	1	1	11
496	11	1	1	1	1	1	1	1	1	1	1	1	11
497	9	1	1	1	1	1	1	1	1	1	0	0	9
498	2	1	0	0	0	0	0	1	0	0	0	0	2
499	11	1	1	1	1	1	1	1	1	1	1	1	11
500	10	1	1	1	1	1	1	1	1	1	1	0	10
501	11	1	1	1	1	1	1	1	1	1	1	1	11
502	6	1	0	0	0	1	2	1	0	1	0	0	5
503	10	1	1	1	1	1	1	1	1	1	1	0	10
504	11	1	1	1	1	1	1	1	1	1	1	1	11
505	10	1	1	1	1	1	1	1	1	1	1	0	10
506	11	1	1	1	1	1	1	1	1	1	1	1	11
507	22	2	2	2	2	2	2	3	2	2	2	1	11
508	11	1	1	1	1	1	1	1	1	1	1	1	11
509	13	1	1	1	1	1	1	1	1	1	2	2	11
510	11	1	1	1	1	1	1	1	1	1	1	1	11
511	11	1	1	1	1	1	1	1	1	1	1	1	11
512	10	1	1	1	1	1	1	1	1	1	1	0	10
513	11	1	1	1	1	1	1	1	1	1	1	1	11
514	11	1	1	1	1	1	1	1	1	1	1	1	11
515	10	1	1	1	1	1	1	1	1	1	1	0	10
516	11	1	1	1	1	1	1	1	1	1	1	1	11
517	4	1	1	0	0	0	0	0	0	0	1	1	4
518	11	1	1	1	1	1	1	1	1	1	1	1	11
519	11	1	1	1	1	1	1	1	1	1	1	1	11
520	18	2	2	2	2	3	2	2	2	0	1	0	9
521	35	4	3	3	3	4	3	3	3	4	4	1	11
522	11	1	1	1	1	1	1	1	1	1	1	1	11
523	12	1	1	1	1	1	1	1	1	1	1	2	11
524	9	1	1	1	1	1	0	1	1	1	1	0	9
525	65	7	3	8	8	8	2	7	8	6	7	1	11
526	9	1	1	1	1	1	1	1	1	0	1	0	9
527	11	1	1	1	1	1	1	1	1	1	1	1	11
528	11	1	1	1	1	1	1	1	1	1	1	1	11
529	11	1	1	1	1	1	1	1	1	1	1	1	11
530	31	3	3	3	3	3	3	3	3	3	3	1	11
531	39	5	2	3	3	6	3	4	3	5	4	1	11
532	11	1	1	1	1	1	1	1	1	1	1	1	11
533	11	1	1	1	1	1	1	1	1	1	1	1	11
534	21	2	2	2	2	2	2	2	2	2	2	1	11
535	11	1	1	1	1	1	1	1	1	1	1	1	11
536	11	1	1	1	1	1	1	1	1	1	1	1	11
537	9	1	1	1	1	1	1	1	1	1	0	0	9
538	42	4	4	4	4	5	4	4	4	4	2	3	11
539	11	1	1	1	1	1	1	1	1	1	1	1	11
540	23	2	2	2	2	2	2	2	2	2	2	3	11
541	10	1	1	1	1	1	1	1	1	1	1	0	10
542	11	1	1	1	1	1	1	1	1	1	1	1	11
543	15	1	1	1	1	1	1	1	1	1	1	5	11
544	22	2	2	2	2	2	2	2	2	2	2	2	11
545	10	1	1	1	1	1	1	1	1	1	1	0	10
546	10	1	1	1	1	1	1	1	1	1	1	0	10
547	11	1	1	1	1	1	1	1	1	1	1	1	11
548	10	1	1	1	1	1	1	1	1	1	1	0	10
549	11	1	1	1	1	1	1	1	1	1	1	1	11
550	10	1	1	1	1	1	1	1	1	1	1	0	10
551	11	1	1	1	1	1	1	1	1	1	1	1	11
552	11	1	1	1	1	1	1	1	1	1	1	1	11
553	21	2	2	2	2	2	2	2	2	2	2	1	11
554	9	1	1	1	1	1	1	1	1	1	0	0	9
555	13	1	1	1	1	1	1	1	1	1	1	3	11
556	10	1	1	1	1	1	1	1	1	1	1	0	10
557	10	1	1	1	1	1	1	1	1	1	1	0	10
558	11	1	1	1	1	1	1	1	1	1	1	1	11
559	16	1	2	2	2	1	2	1	2	1	1	1	11
560	22	2	2	2	2	2	2	2	2	2	2	2	11
561	11	1	1	1	1	1	1	1	1	1	1	1	11
562	11	1	1	1	1	1	1	1	1	1	1	1	11
563	10	1	1	1	1	1	1	1	1	1	1	0	10
564	6	1	0	1	1	1	0	1	1	0	0	0	6
565	37	3	5	4	4	4	3	3	4	3	2	2	11
566	3	0	1	0	0	1	0	0	0	0	1	0	3
567	11	1	1	1	1	1	1	1	1	1	1	1	11
568	10	1	1	1	1	1	1	1	1	1	1	0	10
569	10	1	1	1	1	1	0	1	1	1	1	1	10
570	11	1	1	1	1	1	1	1	1	1	1	1	11
571	19	2	1	2	2	2	2	2	2	2	0	2	10
572	20	2	2	2	2	2	2	2	2	2	1	1	11
573	13	1	1	2	2	1	1	1	2	0	0	2	9
574	9	1	2	1	1	0	2	1	1	0	0	0	7
575	10	1	1	1	1	1	1	1	1	1	1	0	10
576	11	1	1	1	1	1	1	1	1	1	1	1	11
577	6	0	1	1	1	1	0	1	1	0	0	0	6
578	11	1	1	1	1	1	1	1	1	1	1	1	11
579	238	0	59	20	20	3	66	30	20	8	6	6	10
580	10	1	1	1	1	1	1	1	1	1	1	0	10
581	23	2	2	2	2	2	2	2	2	2	2	3	11
582	11	1	1	1	1	1	1	1	1	1	1	1	11
583	9	1	1	1	1	1	1	1	1	1	0	0	9
584	9	1	1	1	1	1	1	1	1	1	0	0	9
585	9	1	1	1	1	1	1	1	1	1	0	0	9
586	7	0	1	1	1	1	1	1	1	0	0	0	7
587	11	1	1	1	1	1	1	1	1	1	1	1	11
588	11	1	1	1	1	1	1	1	1	1	1	1	11
589	43	2	7	5	5	2	8	9	4	0	1	0	9
590	11	1	1	1	1	1	1	1	1	1	1	1	11
591	10	1	1	1	1	1	1	1	1	1	0	1	10
592	10	1	1	1	1	1	1	1	1	1	1	0	10
593	22	2	2	2	2	2	2	2	2	2	2	2	11
594	97	7	6	14	14	9	6	11	14	7	6	3	11
595	91	6	5	14	14	7	6	11	14	6	5	3	11
596	10	1	1	1	1	1	1	1	1	1	1	0	10
597	10	1	1	1	1	1	1	1	1	1	1	0	10
598	23	2	2	2	2	2	2	2	2	2	2	3	11
599	11	1	1	1	1	1	1	1	1	1	1	1	11
600	32	2	2	2	2	2	2	4	2	2	6	6	11
601	2	0	1	0	0	0	0	1	0	0	0	0	2
602	11	1	1	1	1	1	1	1	1	1	1	1	11
603	14	1	1	2	1	1	2	2	2	1	1	0	10
604	10	1	1	1	1	1	1	1	1	1	1	0	10
605	11	1	1	1	1	1	1	1	1	1	1	1	11
606	11	1	1	1	1	1	1	1	1	1	1	1	11
607	45	4	3	5	5	4	3	4	5	4	5	3	11
608	4	0	0	1	1	0	0	0	1	0	1	0	4
609	14	1	2	2	2	1	1	1	2	1	1	0	10
610	9	1	1	1	1	1	1	1	1	1	0	0	9
611	11	1	1	1	1	1	1	1	1	1	1	1	11
612	10	1	1	1	1	1	1	1	1	1	1	0	10
613	20	2	2	2	2	2	2	2	2	2	2	0	10
614	10	1	1	1	1	1	1	1	1	1	1	0	10
615	10	1	1	1	1	1	1	1	1	1	1	0	10
616	11	1	1	1	1	1	1	1	1	1	1	1	11
617	28	2	2	2	2	2	2	3	2	2	3	6	11
618	10	1	1	1	1	1	1	1	1	1	1	0	10
619	3	0	0	0	0	0	0	0	0	0	0	3	1
620	10	1	1	1	1	1	1	1	1	1	1	0	10
621	11	1	1	1	1	1	1	1	1	1	1	1	11
622	11	1	1	1	1	1	1	1	1	1	1	1	11
623	10	1	1	1	1	1	1	1	1	1	1	0	10
624	21	2	2	2	2	2	2	2	2	2	1	2	11
625	27	3	2	3	3	2	2	3	3	2	2	2	11
626	31	3	3	3	3	3	3	3	3	3	2	2	11
627	16	1	1	1	1	1	1	1	1	1	1	6	11
628	11	1	1	1	1	1	1	1	1	1	1	1	11
629	7	1	0	0	0	1	0	1	0	1	1	2	6
630	3	0	0	0	0	0	0	0	0	0	1	2	2
631	11	1	1	1	1	1	1	1	1	1	1	1	11
632	9	1	1	1	1	1	0	1	1	1	1	0	9
633	10	1	1	1	1	1	1	1	1	1	1	0	10
634	11	1	1	1	1	1	1	1	1	1	1	1	11
635	37	3	3	3	3	3	3	3	3	3	1	9	11
636	10	1	1	1	1	1	1	1	1	1	1	0	10
637	13	2	1	1	1	2	1	1	1	2	1	0	10
638	12	1	1	1	1	1	1	1	1	1	1	2	11
639	9	1	1	1	1	1	1	1	1	0	0	1	9
640	11	1	1	1	1	1	1	1	1	1	1	1	11
641	13	1	1	1	1	1	1	1	1	1	1	3	11
642	63	5	3	6	6	6	7	6	6	5	6	7	11
643	8	1	1	1	1	1	1	0	1	1	0	0	8
644	15	1	1	2	2	1	0	2	2	1	2	1	10
645	11	1	1	1	1	1	1	1	1	1	1	1	11
646	8	1	1	1	1	1	0	1	1	1	0	0	8
647	11	1	1	1	1	1	1	1	1	1	1	1	11
648	9	1	1	1	1	1	1	1	1	1	0	0	9
649	11	1	1	1	1	1	1	1	1	1	1	1	11
650	22	0	4	3	3	1	6	0	3	1	1	0	8
651	10	1	1	1	1	1	1	1	1	1	1	0	10
652	10	1	1	1	1	1	1	1	1	1	1	0	10
653	11	1	1	1	1	1	1	1	1	1	1	1	11
654	35	3	3	3	3	3	3	3	3	3	3	5	11
655	11	1	1	1	1	1	1	1	1	1	1	1	11
656	31	3	3	3	3	3	3	3	3	3	3	1	11
657	12	1	1	1	1	1	1	1	1	1	1	2	11
658	12	1	1	1	1	1	1	2	1	1	1	1	11
659	21	2	2	2	2	2	2	2	2	2	2	1	11
660	8	1	1	1	1	1	0	1	1	1	0	0	8
661	9	1	1	1	1	1	1	1	1	1	0	0	9
662	11	1	1	1	1	1	1	1	1	1	1	1	11
663	12	1	1	1	1	1	1	1	1	1	1	2	11
664	9	1	1	1	1	1	1	1	1	1	0	0	9
665	11	1	1	1	1	1	1	1	1	1	1	1	11
666	10	1	1	1	1	1	1	1	1	1	1	0	10
667	12	1	1	1	1	1	1	1	1	1	1	2	11
668	11	1	1	1	1	1	1	1	1	1	1	1	11
669	11	1	1	1	1	1	1	1	1	1	1	1	11
670	10	1	1	1	1	1	1	1	1	1	1	0	10
671	11	1	1	1	1	1	1	1	1	1	1	1	11
672	5	1	1	0	0	1	0	1	0	1	0	0	5
673	67	0	11	5	7	0	5	10	5	0	24	0	7
674	2	0	0	0	0	0	1	1	0	0	0	0	2
675	11	1	1	1	1	1	1	1	1	1	1	1	11
676	11	1	1	1	1	1	1	1	1	1	1	1	11
677	35	3	4	3	3	3	4	3	3	3	4	2	11
678	10	1	1	1	1	1	1	1	1	1	1	0	10
679	5	1	1	0	0	1	0	1	0	1	0	0	5
680	7	1	0	1	1	2	0	0	1	1	0	0	6
681	6	0	1	1	1	1	0	1	1	0	0	0	6
682	2	0	0	0	0	0	0	0	0	0	0	2	1
683	2	0	0	0	0	0	0	0	0	0	0	2	1
684	3	0	0	1	1	0	0	0	1	0	0	0	3
685	11	1	1	1	1	1	1	1	1	1	1	1	11
686	5	0	1	1	1	1	0	0	1	0	0	0	5
687	11	1	1	1	1	1	1	1	1	1	1	1	11
688	35	3	3	3	3	3	3	3	3	3	3	5	11
689	9	1	1	1	1	1	1	1	1	1	0	0	9
690	10	1	1	1	1	1	1	1	1	1	1	0	10
691	6	1	2	0	0	1	0	0	0	1	0	1	5
692	10	1	1	1	1	1	1	1	1	1	1	0	10
693	10	1	1	1	1	1	1	1	1	1	1	0	10
694	22	2	2	2	2	2	2	2	2	2	2	2	11
695	22	2	2	2	2	2	2	2	2	2	2	2	11
696	11	1	1	1	1	1	1	1	1	1	1	1	11
697	11	1	1	1	1	1	1	1	1	1	1	1	11
698	10	1	1	1	1	1	1	1	1	1	1	0	10
699	25	3	3	2	2	4	1	2	2	3	2	1	11
700	3	0	0	0	0	0	0	0	0	0	0	3	1
701	39	4	4	3	3	5	4	4	3	4	3	2	11
702	2	1	0	0	0	0	0	0	0	0	1	0	2
703	10	1	1	1	1	1	1	1	1	1	1	0	10
704	11	1	1	1	1	1	1	1	1	1	1	1	11
705	10	1	1	1	1	1	1	1	1	1	1	0	10
706	10	1	1	1	1	1	1	1	1	1	1	0	10
707	11	1	1	1	1	1	1	1	1	1	1	1	11
708	11	1	1	1	1	1	1	1	1	1	1	1	11
709	41	3	3	4	4	3	3	3	4	3	2	9	11
710	3	0	0	0	0	0	1	1	0	0	0	1	3
711	18	2	2	2	2	2	1	2	2	1	1	1	11
712	7	1	1	1	1	1	0	1	1	0	0	0	7
713	11	1	1	1	1	1	1	1	1	1	1	1	11
714	10	1	1	1	1	1	1	1	1	1	1	0	10
715	11	1	1	1	1	1	1	1	1	1	1	1	11
716	12	1	1	1	1	1	1	1	1	1	1	2	11
717	11	1	1	1	1	1	1	1	1	1	1	1	11
718	11	1	1	1	1	1	1	1	1	1	1	1	11
719	9	1	1	1	1	1	0	1	1	1	1	0	9
720	25	3	2	2	2	3	2	2	2	3	2	2	11
721	26	1	4	4	4	0	6	1	4	1	1	0	9
722	11	1	1	1	1	1	1	1	1	1	1	1	11
723	11	1	1	1	1	1	1	1	1	1	1	1	11
724	10	1	1	1	1	1	1	1	1	1	1	0	10
725	11	1	1	1	1	1	1	1	1	1	1	1	11
726	11	1	1	1	1	1	1	1	1	1	1	1	11
727	21	2	2	2	2	2	2	2	2	2	2	1	11
728	11	1	1	1	1	1	1	1	1	1	1	1	11
729	11	1	1	1	1	1	1	1	1	1	1	1	11
730	11	1	1	2	2	1	0	1	2	0	1	0	8
731	11	1	1	1	1	1	1	1	1	1	1	1	11
732	22	2	2	2	2	2	2	2	2	2	2	2	11
733	9	1	1	1	1	1	1	1	1	1	0	0	9
734	11	1	1	1	1	1	1	1	1	1	1	1	11
735	10	1	1	1	1	1	1	1	1	1	1	0	10
736	10	1	1	1	1	1	1	1	1	1	1	0	10
737	8	1	1	1	1	1	1	0	1	1	0	0	8
738	10	1	1	1	1	1	1	1	1	1	1	0	10
739	10	1	1	1	1	1	1	1	1	1	1	0	10
740	2	1	0	0	0	0	0	0	0	0	1	0	2
741	22	2	2	2	2	2	2	2	2	2	2	2	11
742	21	2	2	2	2	2	2	2	3	2	2	0	10
743	10	1	1	1	1	1	1	1	1	1	1	0	10
744	11	1	1	1	1	1	0	2	1	1	1	1	10
745	11	1	1	1	1	1	1	1	1	1	1	1	11
746	10	1	1	1	1	1	1	1	1	1	1	0	10
747	10	1	1	1	1	1	1	1	1	1	1	0	10
748	11	1	1	1	1	1	1	1	1	1	1	1	11
749	11	1	1	1	1	1	1	1	1	1	1	1	11
750	36	3	3	3	3	3	3	3	3	3	4	5	11
751	25	2	1	3	3	2	2	3	3	2	2	2	11
752	13	1	1	1	1	1	1	1	1	1	1	3	11
753	21	2	2	2	2	2	2	2	2	2	2	1	11
754	7	0	3	1	1	1	0	0	1	0	0	0	5
755	23	2	2	2	2	2	2	2	2	2	3	2	11
756	23	2	2	2	2	2	2	3	2	2	2	2	11
757	22	2	2	2	2	2	2	2	2	2	2	2	11
758	10	1	1	1	1	1	1	1	1	1	1	0	10
759	29	2	3	3	3	3	3	3	3	2	3	1	11
760	11	1	1	1	1	1	1	1	1	1	1	1	11
761	11	1	1	1	1	1	1	1	1	1	1	1	11
762	11	1	1	1	1	1	1	1	1	1	1	1	11
763	21	2	2	2	2	2	2	2	2	2	2	1	11
764	11	1	1	1	1	1	1	1	1	1	1	1	11
765	11	1	1	1	1	1	1	1	1	1	1	1	11
766	11	1	1	1	1	1	1	1	1	1	1	1	11
767	10	1	1	1	1	1	1	1	1	1	1	0	10
768	22	2	2	2	2	2	2	2	2	2	2	2	11
769	11	1	1	1	1	1	1	1	1	1	1	1	11
770	32	3	3	3	3	3	3	3	3	3	2	3	11
771	10	1	1	1	1	1	1	1	1	1	1	0	10
772	10	1	2	1	1	1	0	1	1	1	1	0	9
773	22	2	2	2	2	2	2	2	2	2	2	2	11
774	10	1	1	1	1	1	1	1	1	1	1	0	10
775	11	1	1	1	1	1	1	1	1	1	1	1	11
776	12	1	1	1	1	1	1	1	1	1	1	2	11
777	13	1	1	1	1	1	1	1	1	1	1	3	11
778	13	1	1	1	1	1	1	1	1	1	1	3	11
779	12	1	0	2	2	1	0	1	2	1	1	1	9
780	62	5	6	6	6	5	6	5	6	5	4	8	11
781	4	1	0	0	0	1	0	0	0	1	0	1	4
782	2	0	0	0	0	0	0	0	0	0	0	2	1
783	23	2	2	2	2	2	2	2	3	2	2	2	11
784	11	1	1	1	1	1	1	1	1	1	1	1	11
785	10	1	1	1	1	1	1	1	1	1	1	0	10
786	11	1	1	1	1	1	1	1	1	1	1	1	11
787	12	1	1	1	1	1	1	1	1	1	1	2	11
788	10	1	1	1	1	1	1	1	1	1	1	0	10
789	11	1	1	1	1	1	1	1	1	1	1	1	11
790	13	1	1	1	1	1	1	1	1	1	2	2	11
791	11	1	1	1	1	1	1	1	1	1	1	1	11
792	11	1	1	1	1	1	1	1	1	1	1	1	11
793	4	0	1	1	1	0	0	0	1	0	0	0	4
794	13	1	1	1	1	3	1	1	1	3	0	0	9
795	36	4	2	3	3	3	2	3	3	3	4	6	11
796	5	0	0	0	0	1	0	0	0	0	1	3	3
797	11	1	1	1	1	1	1	1	1	1	1	1	11
798	11	1	1	1	1	1	1	1	1	1	1	1	11
799	10	1	1	1	1	1	1	1	1	1	1	0	10
800	10	1	1	1	1	1	1	1	1	1	1	0	10
801	13	1	2	2	2	1	0	2	2	1	0	0	8
802	12	1	1	1	1	1	1	1	1	1	1	2	11
803	3	0	1	0	0	1	0	0	0	0	1	0	3
804	10	1	1	1	1	1	1	1	1	1	1	0	10
805	11	1	1	1	1	1	1	1	1	1	1	1	11
806	22	2	2	2	2	2	2	2	2	2	2	2	11
807	10	1	1	1	1	1	1	1	1	1	1	0	10
808	11	1	1	1	1	1	1	1	1	1	1	1	11
809	29	3	3	3	3	3	2	3	3	3	3	0	10
810	15	1	1	1	1	2	1	1	1	2	2	2	11
811	9	1	1	1	1	1	1	1	1	1	0	0	9
812	10	1	1	1	1	1	1	1	1	1	1	0	10
813	11	1	1	1	1	1	1	1	1	1	1	1	11
814	11	1	1	1	1	1	1	1	1	1	1	1	11
815	10	1	1	1	1	1	1	1	1	1	1	0	10
816	4	0	1	0	0	1	2	0	0	0	0	0	3
817	11	1	1	1	1	1	1	1	1	1	1	1	11
818	11	1	1	1	1	1	1	1	1	1	1	1	11
819	11	1	1	1	1	1	1	1	1	1	1	1	11
820	11	1	1	1	1	1	1	1	1	1	1	1	11
821	11	1	1	1	1	1	1	1	1	1	1	1	11
822	13	1	1	2	2	1	1	1	2	1	1	0	10
823	22	2	2	2	2	2	2	2	2	2	2	2	11
824	15	1	1	2	2	1	1	1	2	1	2	1	11
825	21	2	2	2	2	2	2	2	2	2	2	1	11
826	11	1	1	1	1	1	1	1	1	1	1	1	11
827	11	1	1	1	1	1	1	1	1	1	1	1	11
828	10	1	1	1	1	1	1	1	1	1	1	0	10
829	18	2	2	1	1	2	2	2	1	2	2	1	11
830	11	1	1	1	1	1	1	1	1	1	1	1	11
831	11	1	1	1	1	1	1	1	1	1	1	1	11
832	10	1	1	1	1	1	1	1	1	1	1	0	10
833	16	1	1	2	2	1	1	2	2	1	1	2	11
834	10	1	1	1	1	1	1	1	1	1	1	0	10
835	19	2	1	2	2	2	2	2	2	2	1	1	11
836	22	2	2	2	2	2	2	2	2	2	2	2	11
837	5	0	1	1	1	1	0	0	1	0	0	0	5
838	13	1	1	2	2	1	1	0	2	1	2	0	9
839	10	1	1	1	1	1	1	1	1	1	1	0	10
840	11	1	1	1	1	1	1	1	1	1	1	1	11
841	45	4	3	5	5	5	2	5	5	4	5	2	11
842	13	1	1	2	2	1	1	1	2	1	1	0	10
843	22	2	2	2	2	2	2	2	2	2	2	2	11
844	10	1	1	1	1	1	1	1	1	1	1	0	10
845	10	1	1	1	1	1	1	1	1	1	1	0	10
846	10	1	1	1	1	1	1	1	1	1	1	0	10
847	10	1	1	1	1	1	1	1	1	1	1	0	10
848	2	0	0	0	0	0	0	1	0	0	1	0	2
849	11	1	1	1	1	1	1	1	1	1	1	1	11
850	10	1	1	1	1	1	1	1	1	1	1	0	10
851	21	2	2	2	2	2	1	2	2	2	1	3	11
852	11	1	0	2	2	1	1	1	2	1	0	0	8
853	12	1	2	1	1	1	1	1	1	1	1	1	11
854	11	1	1	1	1	1	1	1	1	1	1	1	11
855	10	1	1	1	1	1	1	1	1	1	1	0	10
856	11	1	1	1	1	1	1	1	1	1	1	1	11
857	4	0	0	1	1	1	0	0	1	0	0	0	4
858	12	1	1	1	1	1	1	2	1	1	1	1	11
859	13	1	1	1	1	1	2	1	1	1	1	2	11
860	10	1	1	1	1	1	1	1	1	1	1	0	10
861	9	1	1	1	1	1	1	1	1	1	0	0	9
862	11	1	1	1	1	1	1	1	1	1	1	1	11
863	9	1	1	1	1	1	1	1	1	1	0	0	9
864	10	1	1	1	1	1	1	1	1	1	1	0	10
865	21	2	2	2	2	2	2	2	2	2	2	1	11
866	9	1	1	1	1	1	1	1	1	1	0	0	9
867	13	1	1	1	1	1	1	1	1	1	1	3	11
868	12	1	1	1	1	1	1	1	1	1	1	2	11
869	4	0	0	1	1	0	0	0	1	1	0	0	4
870	11	1	1	1	1	1	1	1	1	1	1	1	11
871	11	1	1	1	1	1	1	1	1	1	1	1	11
872	21	2	2	2	2	2	2	2	2	2	2	1	11
873	3	0	0	1	1	0	0	0	1	0	0	0	3
874	11	1	1	1	1	1	1	1	1	1	1	1	11
875	17	1	1	2	2	1	2	2	2	1	2	1	11
876	11	1	1	1	1	1	1	1	1	1	1	1	11
877	11	1	1	1	1	1	1	1	1	1	1	1	11
878	13	1	1	1	1	1	1	1	1	1	1	3	11
879	6	0	1	1	1	0	1	0	1	0	0	1	6
880	12	1	1	1	1	1	1	1	1	1	1	2	11
881	4	0	0	1	1	0	1	0	1	0	0	0	4
882	11	1	1	1	1	1	1	1	1	1	1	1	11
883	10	1	1	1	1	1	1	1	1	1	1	0	10
884	12	1	1	1	1	1	0	1	1	1	2	2	10
885	3	0	1	0	0	1	0	0	0	0	1	0	3
886	5	0	1	1	1	0	0	1	1	0	0	0	5
887	11	1	1	1	1	1	1	1	1	1	1	1	11
888	22	2	1	2	2	2	2	2	2	2	2	3	11
889	9	1	1	1	1	1	1	1	1	1	0	0	9
890	11	1	1	1	1	1	1	1	1	1	1	1	11
891	12	0	1	2	2	1	0	0	2	1	3	0	7
892	9	1	1	1	1	1	1	1	1	1	0	0	9
893	10	1	1	1	1	1	1	1	1	1	1	0	10
894	11	1	1	1	1	1	1	1	1	1	1	1	11
895	11	1	1	1	1	1	1	1	1	1	1	1	11
896	10	1	1	1	1	1	1	1	1	1	1	0	10
897	4	0	0	1	1	0	0	1	1	0	0	0	4
898	10	1	1	1	1	1	0	1	1	1	1	1	10
899	10	1	1	1	1	1	1	1	1	1	1	0	10
900	33	3	3	3	3	3	3	3	3	3	3	3	11
901	10	1	1	1	1	1	1	1	1	1	1	0	10
902	4	0	0	1	1	0	1	0	1	0	0	0	4
903	9	1	1	1	1	1	1	1	1	1	0	0	9
904	7	1	1	1	1	1	0	1	1	0	0	0	7
905	9	1	1	1	1	1	1	1	1	0	1	0	9
906	11	1	1	1	1	1	1	1	1	1	1	1	11
907	12	1	1	1	1	1	1	1	1	1	1	2	11
908	8	1	1	1	1	1	1	0	1	1	0	0	8
909	10	1	1	1	1	1	1	1	1	1	1	0	10
910	11	1	1	1	1	1	1	1	2	1	1	0	10
911	10	1	1	1	1	1	0	1	1	1	1	1	10
912	22	2	2	2	2	2	2	2	2	2	2	2	11
913	10	1	1	1	1	1	1	1	1	1	1	0	10
914	11	1	1	1	1	1	1	2	1	1	1	0	10
915	16	1	2	2	2	1	3	1	2	1	1	0	10
916	11	1	1	1	1	1	1	1	1	1	1	1	11
917	12	2	1	1	1	1	2	1	1	0	2	0	9
918	4	1	0	1	1	0	0	0	1	0	0	0	4
919	15	1	1	2	2	1	1	1	2	1	2	1	11
920	3	0	0	1	1	0	0	0	1	0	0	0	3
921	22	2	2	2	2	2	2	2	2	2	2	2	11
922	8	0	0	2	2	1	1	0	2	0	0	0	5
923	10	1	1	1	1	1	1	1	1	1	1	0	10
924	11	1	1	1	1	1	1	1	1	1	1	1	11
925	11	1	1	1	1	1	1	1	1	1	1	1	11
926	3	0	0	1	1	0	0	0	1	0	0	0	3
927	11	1	1	1	1	1	1	1	1	1	1	1	11
928	6	0	1	0	0	2	2	0	0	0	0	1	4
929	11	1	1	1	1	1	1	1	1	1	1	1	11
930	11	1	1	1	1	1	1	1	1	1	1	1	11
931	11	1	1	1	1	1	1	1	1	1	1	1	11
932	11	1	1	1	1	1	1	1	1	1	1	1	11
933	11	1	1	1	1	1	1	1	1	1	1	1	11
934	3	0	0	1	1	0	0	0	1	0	0	0	3
935	10	1	1	1	1	1	1	1	1	1	1	0	10
936	9	1	1	1	1	1	1	1	1	1	0	0	9
937	11	1	1	1	1	1	1	1	1	1	1	1	11
938	11	1	1	1	1	1	1	1	1	1	1	1	11
939	9	0	0	2	2	1	1	0	2	0	1	0	6
940	11	1	1	1	1	1	1	1	1	1	1	1	11
941	8	1	0	1	1	1	1	1	1	1	0	0	8
942	5	0	0	1	1	1	0	0	1	1	0	0	5
943	10	1	1	1	1	1	1	1	1	1	1	0	10
944	9	1	0	1	1	1	1	1	1	1	1	0	9
945	31	3	3	3	3	3	3	3	3	3	3	1	11
946	42	4	3	4	4	4	4	4	4	4	4	3	11
947	11	1	1	1	1	1	1	1	1	1	1	1	11
948	22	2	2	2	2	2	2	2	2	2	2	2	11
949	10	1	1	1	1	1	1	1	1	1	1	0	10
950	6	0	1	1	1	1	0	1	1	0	0	0	6
951	7	1	1	1	1	1	0	1	1	0	0	0	7
952	8	1	1	1	1	1	0	1	1	1	0	0	8
953	2	0	0	0	0	0	1	1	0	0	0	0	2
954	22	2	2	2	2	2	2	2	2	2	2	2	11
955	9	1	1	1	1	1	1	1	1	0	0	1	9
956	2	0	0	0	0	0	1	0	0	0	1	0	2
957	9	1	1	1	1	1	1	1	1	0	0	1	9
958	10	1	1	1	1	1	1	1	1	1	1	0	10
959	11	1	0	1	1	2	2	1	1	0	1	1	9
960	5	0	0	1	1	0	1	1	1	0	0	0	5
961	11	1	1	1	1	1	1	1	1	1	1	1	11
962	3	0	0	1	1	0	0	0	1	0	0	0	3
963	11	1	1	1	1	1	1	1	1	1	1	1	11
964	10	1	1	1	1	1	1	1	1	1	1	0	10
965	12	1	1	1	1	1	1	1	1	1	1	2	11
966	3	0	0	0	0	0	0	0	0	0	0	3	1
967	4	0	1	1	1	0	0	0	1	0	0	0	4
968	22	2	2	2	2	2	2	2	2	2	1	3	11
969	25	2	2	2	2	2	2	2	2	2	2	5	11
970	11	1	1	1	1	1	1	1	1	1	1	1	11
971	3	0	0	1	1	0	0	0	1	0	0	0	3
972	10	1	1	1	1	1	1	1	1	1	1	0	10
973	13	1	1	1	1	2	1	1	1	1	2	1	11
974	10	1	1	1	1	1	1	1	1	1	1	0	10
975	11	1	1	1	1	1	1	1	1	1	1	1	11
976	11	1	1	1	1	1	1	1	1	1	1	1	11
977	11	1	1	1	1	1	1	1	1	1	1	1	11
978	11	1	1	1	1	1	1	1	1	1	1	1	11
979	8	1	0	1	1	1	1	1	1	1	0	0	8
980	3	0	0	1	1	0	0	0	1	0	0	0	3
981	11	1	1	1	1	1	1	1	1	1	1	1	11
982	12	1	1	1	1	1	1	1	1	1	1	2	11
983	4	0	0	1	1	0	1	0	1	0	0	0	4
984	10	1	1	1	1	1	1	1	1	1	1	0	10
985	11	1	1	1	1	1	1	1	1	1	1	1	11
986	10	1	1	1	1	1	1	1	1	1	1	0	10
987	11	1	1	1	1	1	1	1	1	1	1	1	11
988	29	3	2	3	3	3	2	2	3	3	2	3	11
989	12	1	1	1	1	1	1	1	1	1	1	2	11
990	9	1	1	1	1	1	1	1	1	1	0	0	9
991	5	0	1	1	1	1	0	0	1	0	0	0	5
992	22	0	4	3	3	0	7	0	3	1	1	0	7
993	4	1	0	1	1	0	0	0	1	0	0	0	4
994	10	1	1	1	1	1	1	1	1	1	1	0	10
995	11	1	1	1	1	1	1	1	1	1	1	1	11
996	6	1	0	1	1	0	0	1	1	0	1	0	6
997	11	1	1	1	1	1	1	1	1	1	1	1	11
998	13	1	1	1	1	2	1	1	1	1	1	2	11
999	10	1	1	1	1	1	1	1	1	1	1	0	10
1000	11	1	1	1	1	1	1	1	1	1	1	1	11
1001	11	1	1	1	1	1	1	1	1	1	1	1	11
1002	47	4	5	4	4	4	4	4	6	4	4	4	11
1003	11	1	1	1	1	1	1	1	1	1	1	1	11
1004	4	0	0	1	1	0	0	1	1	0	0	0	4
1005	11	1	1	1	1	1	1	1	1	1	1	1	11
1006	3	0	0	1	1	0	0	0	1	0	0	0	3
1007	11	1	1	1	1	1	1	1	1	1	1	1	11
1008	22	2	2	2	2	2	2	2	2	2	2	2	11
1009	12	1	1	1	1	1	1	1	1	1	1	2	11
1010	10	1	1	1	1	1	1	1	1	1	1	0	10
1011	4	0	0	1	1	0	0	1	1	0	0	0	4
1012	10	1	1	1	1	1	1	1	1	1	1	0	10
1013	10	1	1	1	1	1	1	1	1	1	0	1	10
1014	11	1	1	1	1	1	1	1	1	1	1	1	11
1015	11	1	1	1	1	1	1	1	1	1	1	1	11
1016	23	2	2	2	2	2	2	2	2	2	2	3	11
1017	3	0	0	1	1	0	0	1	0	0	0	0	3
1018	10	1	1	1	1	1	1	1	1	1	1	0	10
1019	9	1	1	1	1	1	1	1	1	0	0	1	9
1020	11	1	1	1	1	1	1	1	1	1	1	1	11
1021	12	1	1	1	1	1	1	1	1	1	1	2	11
1022	10	1	1	1	1	1	1	1	1	1	1	0	10
1023	4	0	1	1	1	0	0	0	1	0	0	0	4
1024	10	1	1	1	1	1	1	1	1	1	1	0	10
1025	4	0	0	1	1	1	0	0	1	0	0	0	4
1026	11	1	1	1	1	1	1	1	1	1	1	1	11
1027	2	0	0	1	0	0	0	0	1	0	0	0	2
1028	9	1	1	1	1	1	1	1	1	1	0	0	9
1029	23	2	1	3	3	2	2	3	3	2	1	1	11
1030	22	2	2	3	2	2	2	2	2	2	2	1	11
1031	11	1	1	1	1	1	1	1	1	1	1	1	11
1032	9	1	1	1	1	1	1	1	1	1	0	0	9
1033	3	0	0	1	1	0	0	0	1	0	0	0	3
1034	11	1	2	1	1	1	0	1	1	1	1	1	10
1035	10	1	1	1	1	1	1	1	1	1	1	0	10
1036	11	1	1	1	1	1	1	1	1	1	1	1	11
1037	32	3	3	3	3	3	3	3	3	3	3	2	11
1038	9	1	1	1	1	1	1	1	1	1	0	0	9
1039	5	0	1	1	1	1	0	0	1	0	0	0	5
1040	11	1	1	1	1	1	1	1	1	1	1	1	11
1041	11	1	1	1	1	1	1	1	1	1	1	1	11
1042	8	1	0	1	1	0	1	1	1	1	1	0	8
1043	10	1	1	1	1	1	1	1	1	1	1	0	10
1044	11	1	1	1	1	1	1	1	1	1	1	1	11
1045	11	1	1	1	1	1	1	1	1	1	1	1	11
1046	11	1	1	1	1	1	1	1	1	1	1	1	11
1047	11	1	1	1	1	1	1	1	1	1	1	1	11
1048	11	1	1	1	1	1	1	1	1	1	1	1	11
1049	11	1	1	1	1	1	1	1	1	1	1	1	11
1050	9	1	1	1	1	1	1	1	1	1	0	0	9
1051	10	1	1	1	1	1	1	1	1	1	1	0	10
1052	24	2	2	2	2	2	2	2	2	2	2	4	11
1053	11	1	1	1	1	1	1	1	1	1	1	1	11
1054	3	0	0	1	1	0	0	0	1	0	0	0	3
1055	12	1	1	2	2	2	1	1	2	0	0	0	8
1056	5	0	1	0	0	1	1	1	0	0	0	1	5
1057	10	1	1	1	1	1	1	1	1	1	1	0	10
1058	11	1	1	1	1	1	1	1	1	1	1	1	11
1059	9	1	1	1	1	1	1	1	1	1	0	0	9
1060	8	0	0	2	2	1	1	0	2	0	0	0	5
1061	22	2	2	2	2	2	2	2	2	2	2	2	11
1062	11	1	1	1	1	1	1	1	1	1	1	1	11
1063	11	1	1	1	1	1	1	1	1	1	1	1	11
1064	14	1	1	2	2	1	0	2	2	1	2	0	9
1065	10	1	1	1	1	1	1	1	1	1	1	0	10
1066	9	1	1	1	1	1	1	1	1	1	0	0	9
1067	3	0	0	1	1	0	0	0	1	0	0	0	3
1068	23	2	2	3	3	2	2	2	3	2	2	0	10
1069	11	1	0	1	1	1	1	1	1	1	1	2	10
1070	5	1	0	0	0	1	1	1	0	1	0	0	5
1071	10	1	1	1	1	1	1	1	1	1	1	0	10
1072	8	1	0	1	1	1	0	1	1	1	1	0	8
1073	8	0	0	2	2	1	1	0	2	0	0	0	5
1074	9	2	0	1	1	1	2	0	1	0	1	0	7
1075	11	1	1	1	1	1	1	1	1	1	1	1	11
1076	10	1	1	1	1	1	1	1	1	1	1	0	10
1077	9	1	1	1	1	1	1	1	1	1	0	0	9
1078	22	2	2	2	2	2	2	2	3	2	2	1	11
1079	11	1	1	1	1	1	1	1	1	1	1	1	11
1080	11	1	1	1	1	1	1	1	1	1	1	1	11
1081	11	1	1	1	1	1	1	1	1	1	1	1	11
1082	6	0	0	2	2	0	0	0	2	0	0	0	3
1083	11	1	1	1	1	1	1	1	1	1	1	1	11
1084	10	1	1	1	1	1	1	1	1	1	1	0	10
1085	11	1	1	1	1	1	1	1	1	1	1	1	11
1086	4	0	0	1	1	1	0	0	1	0	0	0	4
1087	10	1	1	1	1	1	1	1	1	1	1	0	10
1088	23	2	2	2	2	2	2	2	2	2	2	3	11
1089	11	1	1	1	1	1	1	1	1	1	1	1	11
1090	11	1	1	2	2	1	0	2	2	0	0	0	7
1091	10	1	1	1	1	1	1	1	1	1	1	0	10
1092	11	1	1	1	1	1	1	1	1	1	1	1	11
1093	10	1	1	1	1	1	1	1	1	1	1	0	10
1094	10	1	1	1	1	1	1	1	1	1	1	0	10
1095	33	2	2	3	3	4	4	4	3	2	2	4	11
1096	11	1	1	1	1	1	1	1	1	1	1	1	11
1097	10	1	1	1	1	1	1	1	1	1	0	1	10
1098	11	1	2	1	1	1	1	1	1	1	1	0	10
1099	10	1	1	1	1	1	1	1	1	1	1	0	10
1100	22	2	2	2	2	2	2	2	2	2	2	2	11
1101	11	1	1	1	1	1	1	1	1	1	1	1	11
1102	5	0	0	1	1	1	1	0	1	0	0	0	5
1103	3	0	0	1	1	0	0	0	1	0	0	0	3
1104	9	1	1	1	1	1	0	1	1	1	1	0	9
1105	11	1	1	1	1	1	1	1	1	1	1	1	11
1106	10	1	1	1	1	1	1	1	1	1	1	0	10
1107	4	1	0	1	1	0	0	0	1	0	0	0	4
1108	6	1	0	1	1	1	0	0	1	1	0	0	6
1109	10	0	1	1	1	1	1	1	2	1	1	0	9
1110	10	1	1	1	1	1	1	1	1	1	1	0	10
1111	30	3	3	3	3	3	3	3	3	3	3	0	10
1112	21	1	3	2	2	2	4	3	2	1	1	0	10
1113	3	0	0	1	1	0	0	0	1	0	0	0	3
1114	10	1	1	1	1	1	1	1	1	1	1	0	10
1115	11	1	1	1	1	1	1	1	1	1	1	1	11
1116	9	1	1	1	1	1	1	1	1	1	0	0	9
1117	17	2	1	1	1	2	1	2	1	2	1	3	11
1118	22	2	2	2	2	2	2	2	2	2	2	2	11
1119	11	1	1	1	1	1	1	1	1	1	1	1	11
1120	11	1	1	1	1	1	1	1	1	1	1	1	11
1121	8	1	0	1	1	1	1	0	1	1	1	0	8
1122	10	1	1	1	1	1	1	1	1	1	1	0	10
1123	16	2	0	1	1	2	2	2	1	2	1	2	10
1124	4	0	0	1	1	0	0	0	1	1	0	0	4
1125	6	1	0	1	1	1	0	1	1	0	0	0	6
1126	3	0	0	1	1	0	0	0	1	0	0	0	3
1127	10	0	0	2	2	1	1	1	2	0	1	0	7
1128	6	0	0	1	1	1	0	0	1	1	1	0	6
1129	11	1	1	1	1	1	1	1	1	1	1	1	11
1130	14	1	1	2	2	1	1	2	2	1	0	1	10
1131	21	2	2	2	2	2	2	2	2	2	2	1	11
1132	13	1	1	1	1	1	2	1	1	2	1	1	11
1133	5	0	0	1	1	0	0	1	1	0	1	0	5
1134	4	0	0	1	1	0	0	1	1	0	0	0	4
1135	3	0	0	1	1	0	0	0	1	0	0	0	3
1136	9	1	1	1	1	1	1	1	1	1	0	0	9
1137	11	1	1	1	1	1	1	1	1	1	1	1	11
1138	27	1	0	3	3	8	1	3	3	0	5	0	8
1139	11	1	1	1	1	1	1	1	1	1	1	1	11
1140	11	1	1	1	1	1	1	1	1	1	1	1	11
1141	16	1	1	1	1	1	1	1	1	1	2	5	11
1142	10	1	1	1	1	1	1	1	1	1	1	0	10
1143	9	1	1	1	1	1	0	1	1	1	1	0	9
1144	5	0	0	1	1	1	1	0	1	0	0	0	5
1145	6	0	1	1	1	1	0	1	1	0	0	0	6
1146	12	1	1	1	1	1	1	1	1	1	1	2	11
1147	11	1	1	1	1	1	1	1	1	1	1	1	11
1148	10	1	1	1	1	1	1	1	1	1	1	0	10
1149	11	1	1	1	1	1	1	1	1	1	1	1	11
1150	5	0	1	1	1	1	0	0	1	0	0	0	5
1151	32	3	4	3	3	3	3	4	3	3	3	0	10
1152	22	2	2	2	2	2	2	2	2	2	2	2	11
1153	9	1	1	1	1	1	0	1	1	1	1	0	9
1154	7	1	1	1	1	1	0	1	1	0	0	0	7
1155	4	0	0	1	1	0	1	0	1	0	0	0	4
1156	11	1	1	1	1	1	1	1	1	1	1	1	11
1157	42	4	4	4	4	4	4	4	4	4	4	2	11
1158	11	1	1	1	1	1	1	1	1	1	1	1	11
1159	12	1	1	1	1	1	1	2	1	1	1	1	11
1160	11	1	1	1	1	1	1	1	1	1	1	1	11
1161	11	1	1	1	1	1	1	1	1	1	1	1	11
1162	8	1	0	1	1	1	0	1	1	1	1	0	8
1163	11	1	1	1	1	1	1	1	1	1	1	1	11
1164	10	1	1	1	1	1	1	1	1	1	1	0	10
1165	12	1	0	2	2	1	1	1	2	1	1	0	9
1166	11	1	1	1	1	1	1	1	1	1	1	1	11
1167	10	1	1	1	1	1	1	1	1	1	1	0	10
1168	5	0	1	1	1	0	0	0	1	0	1	0	5
1169	19	2	0	3	3	1	2	1	3	1	2	1	10
1170	11	1	1	1	1	2	0	1	1	1	1	1	10
1171	11	1	1	1	1	1	1	1	1	1	1	1	11
1172	10	1	1	1	1	2	0	1	1	1	1	0	9
1173	9	1	1	1	1	1	1	1	1	1	0	0	9
1174	11	1	1	1	1	1	1	1	1	1	1	1	11
1175	12	1	1	1	1	1	1	1	1	1	1	2	11
1176	11	1	1	1	1	1	1	1	1	1	1	1	11
1177	11	1	1	1	1	1	1	1	1	1	1	1	11
1178	11	1	1	1	1	1	1	1	1	1	1	1	11
1179	11	1	1	1	1	1	1	1	1	1	1	1	11
1180	20	2	2	2	2	2	1	2	2	2	2	1	11
1181	11	1	1	1	1	1	1	1	1	1	1	1	11
1182	11	1	1	1	1	1	1	1	1	1	1	1	11
1183	11	1	1	1	1	1	1	1	1	1	1	1	11
1184	11	1	1	1	1	1	1	1	1	1	1	1	11
1185	11	1	1	1	1	1	1	1	1	1	1	1	11
1186	10	1	1	1	1	1	1	1	1	1	1	0	10
1187	11	1	1	1	1	1	1	1	1	1	1	1	11
1188	9	1	1	1	1	1	1	1	1	1	0	0	9
1189	9	1	1	1	1	1	1	1	1	1	0	0	9
1190	12	1	1	1	1	1	1	2	1	1	1	1	11
1191	12	1	1	1	1	1	1	1	1	1	1	2	11
1192	3	0	0	1	1	0	0	0	1	0	0	0	3
1193	9	1	0	1	1	1	2	1	1	0	1	0	8
1194	10	1	1	1	1	1	1	1	1	1	1	0	10
1195	11	1	1	1	1	1	1	1	1	1	1	1	11
1196	11	1	1	1	1	1	1	1	1	1	1	1	11
1197	11	1	1	1	1	1	1	1	1	1	1	1	11
1198	10	1	1	1	1	1	1	1	1	1	1	0	10
1199	12	1	1	1	1	1	1	2	1	1	1	1	11
1200	3	0	0	1	1	0	0	0	1	0	0	0	3
1201	11	1	1	1	1	1	1	1	1	1	1	1	11
1202	11	1	1	1	1	1	1	1	1	1	1	1	11
1203	11	1	1	1	1	1	1	1	1	1	1	1	11
1204	3	0	0	1	1	0	0	0	1	0	0	0	3
1205	23	2	2	2	2	3	2	2	2	2	2	2	11
1206	22	2	2	2	2	2	2	2	2	2	2	2	11
1207	11	1	1	1	1	1	1	1	1	1	1	1	11
1208	11	1	1	1	1	1	1	1	1	1	1	1	11
1209	2	0	1	0	0	1	0	0	0	0	0	0	2
1210	17	0	1	3	4	0	1	3	4	0	1	0	7
1211	21	2	2	2	2	2	2	2	2	2	3	0	10
1212	11	1	1	1	1	1	1	1	1	1	1	1	11
1213	3	0	0	1	1	0	0	0	1	0	0	0	3
1214	11	1	1	1	1	1	1	1	1	1	1	1	11
1215	11	1	1	1	1	1	1	1	1	1	1	1	11
1216	9	1	1	1	1	1	1	1	1	1	0	0	9
1217	10	1	1	1	1	1	1	1	1	1	1	0	10
1218	5	0	0	1	1	0	0	1	1	0	0	1	5
1219	11	1	1	1	1	1	1	1	1	1	1	1	11
1220	11	1	1	1	1	1	1	1	1	1	1	1	11
1221	11	1	1	1	1	1	1	1	1	1	1	1	11
1222	11	1	1	1	1	1	1	1	1	1	1	1	11
1223	5	0	1	1	1	1	0	0	1	0	0	0	5
1224	23	2	2	2	2	2	2	2	2	2	2	3	11
1225	11	1	1	1	1	1	1	1	1	1	1	1	11
1226	10	1	1	1	1	0	1	1	1	1	1	1	10
1227	5	0	0	1	1	1	1	0	1	0	0	0	5
1228	11	1	1	1	1	1	1	1	1	1	1	1	11
1229	10	1	1	1	1	1	1	1	1	1	1	0	10
1230	8	1	0	1	1	0	1	1	1	1	1	0	8
1231	11	1	1	1	1	1	1	1	1	1	1	1	11
1232	10	1	1	1	1	1	1	1	1	1	1	0	10
1233	11	1	1	1	1	1	1	1	1	1	1	1	11
1234	22	2	2	2	2	2	2	2	2	2	2	2	11
1235	8	1	0	1	1	1	0	1	1	1	1	0	8
1236	23	2	3	2	2	2	3	2	2	2	2	1	11
1237	25	2	2	2	2	2	2	2	2	2	2	5	11
1238	14	1	1	2	2	1	1	1	2	1	1	1	11
1239	2	0	0	0	0	1	0	0	0	1	0	0	2
1240	10	1	1	1	1	1	1	1	1	1	1	0	10
1241	12	1	1	1	1	1	1	1	1	1	1	2	11
1242	10	1	1	1	1	1	1	1	1	1	1	0	10
1243	22	2	2	2	2	3	1	2	2	2	2	2	11
1244	10	1	1	1	1	1	1	1	1	1	0	1	10
1245	11	1	1	1	1	1	1	1	1	1	1	1	11
1246	11	1	1	1	1	1	1	1	1	1	1	1	11
1247	3	0	0	1	1	0	0	0	1	0	0	0	3
1248	3	0	0	1	1	0	0	0	1	0	0	0	3
1249	10	1	1	1	1	1	1	1	1	1	1	0	10
1250	13	1	1	2	2	0	0	1	2	0	2	2	8
1251	10	1	1	1	1	1	1	1	1	1	1	0	10
1252	11	1	1	1	1	1	1	1	1	1	1	1	11
1253	11	1	1	1	1	1	1	1	1	1	1	1	11
1254	11	1	1	1	1	1	1	1	1	1	1	1	11
1255	9	1	1	1	1	1	1	1	1	1	0	0	9
1256	18	1	1	3	3	2	2	1	3	0	1	1	10
1257	11	1	1	1	1	1	1	1	1	1	1	1	11
1258	11	1	1	1	1	1	1	1	1	1	1	1	11
1259	21	2	1	3	3	2	1	3	3	2	1	0	10
1260	22	2	2	2	2	2	2	2	2	2	2	2	11
1261	23	2	2	2	2	2	2	2	2	2	2	3	11
1262	10	1	1	1	1	1	1	1	1	1	1	0	10
1263	11	1	1	1	1	1	1	1	1	1	1	1	11
1264	8	1	0	1	1	1	0	1	1	1	1	0	8
1265	3	0	0	1	1	0	0	0	1	0	0	0	3
1266	3	0	0	1	1	0	0	0	1	0	0	0	3
1267	9	1	1	1	1	1	1	1	1	1	0	0	9
1268	10	1	1	1	1	1	1	1	1	1	0	1	10
1269	11	1	1	1	1	2	1	1	1	1	1	0	10
1270	11	1	1	1	1	1	1	1	1	1	1	1	11
1271	23	2	2	2	2	2	2	2	2	2	2	3	11
1272	13	1	1	1	1	1	1	1	1	1	1	3	11
1273	10	1	1	1	1	1	1	1	1	1	1	0	10
1274	10	1	1	1	1	1	1	1	1	1	1	0	10
1275	9	1	1	1	1	1	1	1	1	1	0	0	9
1276	10	1	1	1	1	1	1	1	1	1	1	0	10
1277	10	1	1	1	1	1	1	1	1	1	1	0	10
1278	11	1	1	1	1	1	1	1	1	1	1	1	11
1279	11	1	1	1	1	1	1	1	1	1	1	1	11
1280	11	1	1	1	1	1	1	1	1	1	1	1	11
1281	4	0	0	1	1	1	0	0	1	0	0	0	4
1282	15	1	1	3	3	1	1	1	3	0	0	1	9
1283	11	1	1	1	1	1	1	1	1	1	1	1	11
1284	10	1	1	1	1	1	1	1	1	1	1	0	10
1285	10	1	1	1	1	1	1	1	1	1	1	0	10
1286	10	1	1	1	1	2	1	1	1	0	1	0	9
1287	11	1	1	1	1	1	1	1	1	1	1	1	11
1288	9	1	1	1	1	1	1	1	1	1	0	0	9
1289	12	1	1	2	2	2	1	1	2	0	0	0	8
1290	10	1	0	1	1	2	2	1	1	0	1	0	8
1291	12	1	1	1	1	1	1	1	2	1	1	1	11
1292	11	1	1	1	1	1	1	1	1	1	1	1	11
1293	11	1	1	1	1	1	1	1	1	1	1	1	11
1294	12	1	1	1	1	1	1	1	1	1	2	1	11
1295	21	2	2	2	2	2	2	2	2	2	2	1	11
1296	12	1	1	1	1	1	1	1	2	1	1	1	11
1297	10	1	1	1	1	1	1	1	1	1	1	0	10
1298	25	2	2	2	2	2	2	2	2	3	3	3	11
1299	10	1	1	1	1	1	1	1	1	1	1	0	10
1300	8	1	1	1	1	1	0	1	1	1	0	0	8
1301	11	1	1	1	1	1	1	1	1	1	1	1	11
1302	10	1	1	1	1	1	1	1	1	1	1	0	10
1303	11	1	1	1	1	1	1	1	1	1	1	1	11
1304	10	1	1	1	1	1	1	1	1	1	1	0	10
1305	11	1	1	1	1	1	1	1	1	1	1	1	11
1306	9	1	1	1	1	1	1	1	1	1	0	0	9
1307	4	0	0	1	1	0	1	0	1	0	0	0	4
1308	10	1	1	1	1	1	1	1	1	1	1	0	10
1309	11	1	1	1	1	1	1	1	1	1	1	1	11
1310	5	0	0	1	1	0	0	1	1	0	1	0	5
1311	10	1	1	1	1	1	1	1	1	1	1	0	10
1312	10	1	1	1	1	1	1	1	1	1	1	0	10
1313	9	1	0	1	1	1	1	1	1	1	1	0	9
1314	11	1	1	1	1	1	1	1	1	1	1	1	11
1315	5	0	1	1	1	0	0	0	1	0	1	0	5
1316	11	1	1	1	1	1	1	1	1	1	1	1	11
1317	10	1	1	1	1	1	1	1	1	1	1	0	10
1318	55	0	5	3	4	5	17	10	4	0	7	0	8
1319	5	0	0	1	1	0	1	1	1	0	0	0	5
1320	10	2	0	1	1	0	1	1	1	1	2	0	8
1321	8	0	0	2	2	1	1	0	2	0	0	0	5
1322	22	2	2	2	2	2	2	2	2	2	2	2	11
1323	21	2	2	2	2	2	2	2	2	2	2	1	11
1324	6	0	1	1	1	1	0	1	1	0	0	0	6
1325	11	1	1	1	1	1	1	1	1	1	1	1	11
1326	11	1	1	1	1	1	1	1	1	1	1	1	11
1327	10	1	1	1	1	1	1	1	1	1	1	0	10
1328	11	1	1	1	1	1	1	1	1	1	1	1	11
1329	8	1	0	1	1	1	1	1	1	1	0	0	8
1330	10	1	1	1	1	1	1	1	1	1	1	0	10
1331	3	0	0	1	1	0	0	0	1	0	0	0	3
1332	4	0	0	1	1	0	0	0	1	0	1	0	4
1333	10	1	1	1	1	1	1	1	1	1	1	0	10
1334	10	1	1	1	1	1	1	1	1	1	1	0	10
1335	9	1	1	1	1	1	1	1	1	0	1	0	9
1336	3	0	0	1	1	0	0	0	1	0	0	0	3
1337	10	1	1	1	1	1	1	1	1	1	1	0	10
1338	10	1	1	1	1	1	1	0	1	1	1	1	10
1339	11	1	1	1	1	1	1	1	1	1	1	1	11
1340	21	2	2	2	2	2	2	2	2	2	2	1	11
1341	15	1	1	2	2	1	1	2	2	1	1	1	11
1342	11	1	1	1	1	1	1	1	1	1	1	1	11
1343	11	1	1	1	1	1	1	1	1	1	1	1	11
1344	9	1	0	1	1	1	1	1	1	1	1	0	9
1345	11	1	1	1	1	1	1	1	1	1	1	1	11
1346	6	0	1	1	1	1	0	1	1	0	0	0	6
1347	7	0	0	2	2	0	1	0	2	0	0	0	4
1348	11	1	1	1	1	1	1	1	1	1	1	1	11
1349	12	1	1	1	1	1	1	1	1	1	1	2	11
1350	11	1	1	1	1	1	1	1	1	1	1	1	11
1351	11	1	1	1	1	1	1	1	1	1	1	1	11
1352	11	1	1	1	1	1	1	1	1	1	1	1	11
1353	12	1	1	1	1	1	1	1	1	1	1	2	11
1354	9	1	1	1	1	1	1	1	1	1	0	0	9
1355	11	1	1	1	1	1	1	1	1	1	1	1	11
1356	11	1	1	1	1	1	1	1	1	1	1	1	11
1357	10	1	1	1	1	1	1	1	1	1	1	0	10
1358	10	1	1	1	1	1	1	1	1	1	1	0	10
1359	10	1	1	1	1	1	1	1	1	1	1	0	10
1360	10	1	1	1	1	1	1	1	1	1	1	0	10
1361	11	1	1	1	1	1	1	1	1	1	1	1	11
1362	13	1	1	1	1	1	1	1	1	1	1	3	11
1363	11	1	1	1	1	1	1	1	1	1	1	1	11
1364	5	0	0	1	1	1	0	1	1	0	0	0	5
1365	12	1	1	1	1	1	1	1	1	1	1	2	11
1366	10	1	1	1	1	1	1	1	1	1	1	0	10
1367	5	0	0	1	1	0	1	1	1	0	0	0	5
1368	11	1	1	1	1	1	1	1	1	1	1	1	11
1369	12	1	1	1	1	1	1	1	1	1	1	2	11
1370	10	1	1	1	1	1	1	1	1	1	1	0	10
1371	9	1	1	1	1	1	1	1	1	1	0	0	9
1372	11	1	1	1	1	1	1	1	1	1	1	1	11
1373	2	0	0	0	0	0	0	0	0	0	0	2	1
1374	43	4	4	4	4	4	4	4	4	4	3	4	11
1375	6	0	2	1	1	0	1	0	1	0	0	0	5
1376	3	0	0	1	1	0	0	0	1	0	0	0	3
1377	10	1	1	1	1	1	1	1	1	1	1	0	10
1378	8	0	0	2	2	1	1	0	2	0	0	0	5
1379	11	1	1	1	1	1	1	1	1	1	1	1	11
1380	11	1	1	1	1	1	1	1	1	1	1	1	11
1381	9	1	1	1	1	1	1	1	1	1	0	0	9
1382	11	1	1	1	1	1	1	1	1	1	1	1	11
1383	21	2	2	2	2	2	2	2	2	2	1	2	11
1384	11	1	1	1	1	1	1	1	1	1	1	1	11
1385	22	2	2	2	2	2	2	2	2	2	2	2	11
1386	10	1	1	1	1	1	1	1	1	1	1	0	10
1387	12	1	1	1	1	1	1	1	1	1	1	2	11
1388	5	0	1	1	1	1	0	0	1	0	0	0	5
1389	11	1	1	1	1	1	1	1	1	1	1	1	11
1390	12	1	1	2	2	1	1	1	2	1	0	0	9
1391	22	2	2	2	2	2	2	2	2	2	2	2	11
1392	11	1	1	1	1	1	1	1	1	1	1	1	11
1393	11	1	1	1	1	1	1	1	1	1	1	1	11
1394	21	2	3	2	2	2	2	2	2	2	2	0	10
1395	18	2	2	2	2	2	2	2	1	2	1	0	10
1396	11	1	1	1	1	1	1	1	1	1	1	1	11
1397	9	1	1	1	1	1	1	1	1	1	0	0	9
1398	11	1	1	1	1	1	1	1	1	1	1	1	11
1399	7	0	0	1	1	1	1	1	1	1	0	0	7
1400	11	1	1	1	1	1	1	1	1	1	1	1	11
1401	8	0	0	2	2	1	1	0	2	0	0	0	5
1402	10	1	1	1	1	2	1	1	1	0	1	0	9
1403	12	1	1	1	1	1	1	1	1	1	1	2	11
1404	10	1	1	1	1	1	1	1	1	1	1	0	10
1405	11	1	1	1	1	1	1	1	1	1	1	1	11
1406	7	0	1	2	2	0	0	0	2	0	0	0	4
1407	10	1	1	1	1	1	1	1	1	1	1	0	10
1408	12	1	1	1	1	1	1	1	1	1	1	2	11
1409	12	1	1	1	1	1	1	1	1	1	1	2	11
1410	10	1	1	1	1	1	1	1	1	1	1	0	10
1411	20	2	2	2	2	2	2	2	2	2	1	1	11
1412	21	2	2	2	2	2	2	2	2	2	2	1	11
1413	21	2	2	2	2	2	2	2	2	2	2	1	11
1414	11	1	1	1	1	1	1	1	1	1	1	1	11
1415	12	1	1	1	1	1	1	1	1	1	2	1	11
1416	3	0	0	1	1	0	0	0	1	0	0	0	3
1417	11	1	1	1	1	1	1	1	1	1	1	1	11
1418	10	1	1	1	1	1	1	1	1	1	1	0	10
1419	10	1	1	1	1	1	1	1	1	1	1	0	10
1420	10	1	1	1	1	1	1	1	1	1	1	0	10
1421	11	1	1	1	1	1	1	1	1	1	1	1	11
1422	8	0	0	2	2	1	1	0	2	0	0	0	5
1423	11	1	1	1	1	1	1	1	1	1	1	1	11
1424	10	1	1	1	1	1	1	1	1	1	1	0	10
1425	14	1	1	1	1	1	2	1	1	1	1	3	11
1426	9	1	1	1	1	1	1	1	1	1	0	0	9
1427	10	1	1	1	1	1	1	1	1	1	1	0	10
1428	9	1	1	1	1	1	1	1	1	1	0	0	9
1429	11	1	1	1	1	1	1	1	1	1	1	1	11
1430	11	1	1	1	1	1	1	1	1	1	1	1	11
1431	12	0	0	2	2	3	2	1	2	0	0	0	6
1432	8	1	1	1	1	1	1	0	1	1	0	0	8
1433	9	1	1	1	1	1	1	1	1	1	0	0	9
1434	6	0	1	1	1	1	0	1	1	0	0	0	6
1435	9	1	1	1	1	1	1	1	1	1	0	0	9
1436	11	1	1	1	1	1	1	1	1	1	1	1	11
1437	10	1	1	1	1	1	1	1	1	1	1	0	10
1438	3	0	0	1	1	0	0	0	1	0	0	0	3
1439	10	1	1	1	1	1	1	1	1	1	1	0	10
1440	9	1	1	1	1	1	1	1	1	1	0	0	9
1441	10	1	1	1	1	1	1	1	1	1	1	0	10
1442	11	1	1	1	1	1	1	1	1	1	1	1	11
1443	10	1	1	1	1	1	1	1	1	1	1	0	10
1444	3	0	0	1	1	0	0	0	1	0	0	0	3
1445	11	1	1	1	1	1	1	1	1	1	1	1	11
1446	8	0	0	2	2	1	1	0	2	0	0	0	5
1447	11	1	1	1	1	1	1	1	1	1	1	1	11
1448	11	1	1	1	1	1	1	1	1	1	1	1	11
1449	3	0	0	1	1	0	0	0	1	0	0	0	3
1450	11	1	1	1	1	1	1	1	1	1	1	1	11
1451	7	0	0	1	1	1	0	0	1	0	0	3	5
1452	3	0	0	1	1	0	0	0	1	0	0	0	3
1453	10	1	1	1	1	1	1	1	1	1	1	0	10
1454	10	1	1	1	1	1	0	1	1	1	1	1	10
1455	11	1	1	1	1	1	1	1	1	1	1	1	11
1456	8	1	1	1	1	1	0	1	1	1	0	0	8
1457	22	2	2	2	2	2	2	3	2	2	1	2	11
1458	2	0	0	1	0	0	0	0	1	0	0	0	2
1459	12	1	1	1	1	1	1	1	1	1	1	2	11
1460	11	1	1	1	1	1	1	1	1	1	1	1	11
1461	12	1	1	1	1	1	1	1	1	1	1	2	11
1462	10	1	1	1	1	1	1	1	1	1	1	0	10
1463	11	1	1	1	1	1	1	1	1	1	1	1	11
1464	11	1	1	1	1	1	1	1	1	1	1	1	11
1465	12	1	1	1	1	1	1	1	1	1	1	2	11
1466	23	2	3	2	2	2	2	3	2	2	2	1	11
1467	10	1	1	1	1	1	1	1	1	1	1	0	10
1468	24	2	2	2	2	2	2	1	2	2	2	5	11
1469	11	1	1	1	1	1	1	1	1	1	1	1	11
1470	11	1	1	1	1	1	1	1	1	1	1	1	11
1471	11	1	1	1	1	1	1	1	1	1	1	1	11
1472	11	1	1	1	1	1	1	1	1	1	1	1	11
1473	11	1	1	1	1	1	1	1	1	1	1	1	11
1474	11	1	1	1	1	1	1	1	1	1	1	1	11
1475	3	0	0	1	1	0	0	0	1	0	0	0	3
1476	11	1	1	1	1	1	1	1	1	1	1	1	11
1477	11	1	1	1	1	1	1	1	1	1	1	1	11
1478	11	1	1	1	1	1	1	1	1	1	1	1	11
1479	11	1	1	1	1	1	1	1	1	1	1	1	11
1480	11	1	1	1	1	1	1	1	1	1	1	1	11
1481	11	1	1	1	1	1	1	1	1	1	0	2	10
1482	11	1	1	1	1	1	1	1	1	1	1	1	11
1483	6	0	1	1	1	0	1	1	1	0	0	0	6
1484	11	1	1	1	1	1	1	1	1	1	1	1	11
1485	4	0	0	1	1	1	0	1	0	0	0	0	4
1486	7	1	1	1	1	1	0	1	1	0	0	0	7
1487	9	1	1	1	1	1	1	1	1	0	1	0	9
1488	11	1	1	1	1	1	1	1	1	1	1	1	11
1489	7	1	1	1	1	1	0	1	1	0	0	0	7
1490	10	1	1	1	1	1	1	1	1	1	1	0	10
1491	11	1	1	1	1	1	1	1	1	1	1	1	11
1492	12	1	1	1	1	1	1	1	1	1	2	1	11
1493	12	1	1	1	1	1	1	1	1	1	1	2	11
1494	11	1	1	1	1	1	1	1	1	1	1	1	11
1495	8	1	0	1	1	0	1	1	1	1	1	0	8
1496	22	2	2	3	3	2	2	2	3	2	1	0	10
1497	9	1	1	1	1	1	1	1	1	1	0	0	9
1498	3	0	0	1	1	0	0	0	1	0	0	0	3
1499	10	1	1	1	1	1	1	1	1	1	1	0	10
1500	11	1	1	1	1	2	0	1	1	1	1	1	10
1501	8	1	0	1	1	0	1	1	1	1	1	0	8
1502	11	1	1	1	1	1	1	1	1	1	1	1	11
1503	11	1	1	1	1	1	1	1	1	1	1	1	11
1504	10	1	1	1	1	1	1	1	1	1	1	0	10
1505	3	0	0	0	0	0	0	0	0	0	2	1	2
1506	11	1	1	1	1	1	1	1	1	1	1	1	11
1507	8	1	0	1	1	1	1	1	1	1	0	0	8
1508	31	3	2	3	3	3	3	3	3	3	3	2	11
1509	11	1	1	1	1	1	1	1	1	1	1	1	11
1510	6	0	2	1	1	1	0	0	1	0	0	0	5
1511	13	1	1	1	1	1	1	1	1	1	1	3	11
1512	2	0	0	0	0	0	0	0	0	0	1	1	2
1513	11	1	1	1	1	1	1	1	1	1	1	1	11
1514	10	1	1	1	1	1	1	1	1	1	1	0	10
1515	11	1	1	1	1	1	1	1	1	1	1	1	11
1516	10	1	1	1	1	1	1	1	1	1	1	0	10
1517	21	2	2	2	2	2	2	2	2	2	2	1	11
1518	4	0	0	1	1	0	0	1	1	0	0	0	4
1519	22	2	2	2	2	2	2	2	2	2	2	2	11
1520	21	2	2	2	2	2	2	3	2	2	2	0	10
1521	11	1	1	1	1	1	1	1	1	1	1	1	11
1522	9	1	1	1	1	1	1	1	1	1	0	0	9
1523	11	1	1	1	1	1	1	1	1	1	1	1	11
1524	10	1	1	1	1	1	1	1	1	1	1	0	10
1525	4	0	0	1	1	0	0	1	1	0	0	0	4
1526	4	0	0	1	1	0	1	0	1	0	0	0	4
1527	4	0	0	1	0	2	0	1	0	0	0	0	3
1528	8	0	0	2	2	1	1	0	2	0	0	0	5
1529	10	1	1	1	1	1	1	1	1	1	1	0	10
1530	11	1	1	1	1	1	1	1	1	1	1	1	11
1531	17	1	3	2	2	2	1	1	2	1	2	0	10
1532	6	0	1	1	1	1	0	1	1	0	0	0	6
1533	9	0	1	1	1	1	1	1	1	1	1	0	9
1534	3	0	0	1	1	0	0	0	1	0	0	0	3
1535	12	1	2	1	1	1	1	1	1	1	1	1	11
1536	11	1	1	1	1	1	1	1	1	1	1	1	11
1537	13	1	1	1	1	1	1	1	1	1	2	2	11
1538	11	1	1	1	1	1	1	1	1	1	1	1	11
1539	11	1	1	1	1	1	1	1	1	1	1	1	11
1540	9	1	1	1	1	1	0	1	1	1	0	1	9
1541	6	0	0	1	1	0	0	1	1	0	1	1	6
1542	21	2	2	2	2	2	2	2	2	2	2	1	11
1543	27	2	3	3	3	3	2	2	3	2	2	2	11
1544	10	1	1	1	1	1	1	1	1	1	1	0	10
1545	20	2	1	2	2	2	1	2	2	2	2	2	11
1546	10	1	1	1	1	1	1	1	1	1	1	0	10
1547	10	1	1	1	1	1	1	1	1	1	1	0	10
1548	11	1	1	1	1	1	1	1	1	1	1	1	11
1549	10	1	1	1	1	1	1	1	1	1	1	0	10
1550	11	1	1	1	1	1	1	1	1	1	1	1	11
1551	11	1	1	1	1	1	1	1	1	1	1	1	11
1552	20	2	2	2	2	2	2	2	2	2	2	0	10
1553	10	1	1	1	1	1	1	1	1	1	1	0	10
1554	2	0	1	0	0	0	0	1	0	0	0	0	2
1555	5	1	0	1	1	0	0	1	1	0	0	0	5
1556	11	1	1	1	1	1	1	1	1	1	1	1	11
1557	11	1	1	1	1	1	1	1	1	1	1	1	11
1558	10	1	1	1	1	1	1	1	1	1	0	1	10
1559	11	1	1	1	1	1	1	1	1	1	1	1	11
1560	12	1	1	1	1	1	2	1	1	1	1	1	11
1561	12	1	1	1	1	1	1	1	1	1	1	2	11
1562	22	2	2	2	2	2	2	2	2	2	2	2	11
1563	22	2	2	2	2	2	2	2	2	2	2	2	11
1564	10	1	1	1	1	1	1	1	1	1	1	0	10
1565	22	2	2	2	2	2	2	2	2	2	2	2	11
1566	11	1	1	1	1	1	1	1	1	1	1	1	11
1567	3	0	0	1	1	0	0	0	1	0	0	0	3
1568	11	1	1	1	1	1	1	1	1	1	1	1	11
1569	8	1	0	1	1	1	1	1	1	1	0	0	8
1570	9	1	1	1	1	1	0	1	1	1	0	1	9
1571	10	1	1	1	1	1	1	1	1	1	1	0	10
1572	7	0	0	1	2	1	1	0	2	0	0	0	5
1573	11	1	1	1	1	1	1	1	1	1	1	1	11
1574	11	1	1	1	1	1	1	1	1	1	1	1	11
1575	10	1	1	1	1	1	1	1	1	1	1	0	10
1576	4	0	0	1	1	0	0	0	1	0	1	0	4
1577	3	0	0	1	1	0	0	0	1	0	0	0	3
1578	11	1	1	1	1	1	1	1	1	1	1	1	11
1579	4	0	0	1	1	0	1	0	1	0	0	0	4
1580	16	2	1	2	2	1	2	1	2	1	2	0	10
1581	4	0	0	1	1	1	0	0	1	0	0	0	4
1582	11	1	1	1	1	1	1	1	1	1	1	1	11
1583	3	0	0	1	1	0	0	0	1	0	0	0	3
1584	11	1	1	1	1	1	1	1	1	1	1	1	11
1585	5	0	0	1	1	0	0	0	1	0	2	0	4
1586	25	2	4	2	2	3	3	2	2	2	1	2	11
1587	10	2	0	0	0	3	1	1	0	2	1	0	6
1588	10	1	1	1	1	1	1	1	1	1	1	0	10
1589	11	1	1	1	1	1	1	1	1	1	1	1	11
1590	11	1	1	1	1	1	1	1	1	1	1	1	11
1591	10	1	1	1	1	1	1	1	1	1	1	0	10
1592	3	0	0	1	1	0	0	0	1	0	0	0	3
1593	3	0	0	1	1	0	0	0	1	0	0	0	3
1594	9	1	1	1	1	1	0	1	1	1	1	0	9
1595	10	1	1	1	1	1	1	1	1	1	1	0	10
1596	4	0	1	1	1	0	0	0	1	0	0	0	4
1597	11	1	1	1	1	1	1	1	1	1	1	1	11
1598	11	1	1	1	1	1	1	1	1	1	1	1	11
1599	7	0	1	1	1	0	1	1	1	0	1	0	7
1600	12	1	0	2	2	1	1	2	2	1	0	0	8
1601	11	1	1	1	1	1	1	1	1	1	1	1	11
1602	10	1	1	1	1	1	1	1	1	1	1	0	10
1603	3	0	0	1	1	0	0	0	1	0	0	0	3
1604	9	1	1	1	1	1	1	1	1	1	0	0	9
1605	13	1	2	1	1	1	1	1	1	1	3	0	10
1606	11	1	1	1	1	1	1	1	1	1	1	1	11
1607	3	0	0	1	1	0	0	0	1	0	0	0	3
1608	22	2	2	2	2	2	2	2	2	2	2	2	11
1609	11	1	1	1	1	1	1	1	1	1	1	1	11
1610	10	1	1	1	1	1	1	1	1	1	1	0	10
1611	11	1	1	1	1	1	1	1	1	1	1	1	11
1612	6	0	0	1	1	1	0	0	1	1	1	0	6
1613	11	1	1	1	1	1	1	1	1	1	1	1	11
1614	10	1	1	1	1	1	1	1	1	1	1	0	10
1615	7	0	2	1	1	1	0	1	1	0	0	0	6
1616	2	0	0	0	0	0	0	0	0	0	0	2	1
1617	11	1	1	1	1	1	1	1	1	1	1	1	11
1618	11	1	1	1	1	1	1	1	1	1	1	1	11
1619	10	1	1	1	1	1	1	1	1	1	1	0	10
1620	9	1	0	1	1	1	1	1	1	1	1	0	9
1621	11	1	1	1	1	1	1	1	1	1	1	1	11
1622	22	2	2	2	2	2	2	2	2	2	2	2	11
1623	11	1	1	1	1	1	1	1	1	1	1	1	11
1624	8	0	0	2	2	1	1	0	2	0	0	0	5
1625	11	1	1	1	1	1	1	1	1	1	1	1	11
1626	11	1	1	1	1	1	1	1	1	1	1	1	11
1627	21	2	2	2	2	2	2	2	2	2	2	1	11
1628	11	1	1	1	1	1	1	1	1	1	1	1	11
1629	9	1	0	1	1	1	1	1	1	1	1	0	9
1630	11	1	1	1	1	1	1	1	1	1	1	1	11
1631	2	0	0	0	0	0	0	0	0	0	1	1	2
1632	8	1	1	1	1	1	0	1	1	1	0	0	8
1633	10	1	1	1	1	1	1	1	1	1	1	0	10
1634	10	1	1	1	1	1	1	1	1	1	1	0	10
1635	6	0	1	1	1	1	1	0	1	0	0	0	6
1636	11	1	1	1	1	1	1	1	1	1	1	1	11
1637	10	1	1	1	1	1	2	1	1	1	0	0	9
1638	10	1	1	1	1	1	1	1	1	1	1	0	10
1639	10	1	1	1	1	1	1	1	1	1	1	0	10
1640	11	1	1	1	1	1	1	1	1	1	1	1	11
1641	10	1	1	1	1	1	1	1	1	1	1	0	10
1642	6	0	0	1	1	1	1	0	1	0	1	0	6
1643	10	1	1	1	1	1	1	1	1	1	1	0	10
1644	11	1	1	1	1	1	1	1	1	1	1	1	11
1645	11	1	1	1	1	1	1	1	1	1	1	1	11
1646	11	1	1	1	1	1	1	1	1	1	1	1	11
1647	11	1	1	1	1	1	1	1	1	1	1	1	11
1648	5	0	0	1	1	1	0	1	1	0	0	0	5
1649	10	1	1	1	1	1	1	1	1	1	1	0	10
1650	4	0	1	1	1	0	0	0	1	0	0	0	4
1651	10	1	1	1	1	1	1	1	1	1	1	0	10
1652	10	1	1	1	1	1	1	1	1	1	1	0	10
1653	11	1	1	1	1	1	1	1	1	1	1	1	11
1654	11	1	1	1	1	1	1	1	1	1	1	1	11
1655	9	1	1	1	1	1	0	1	1	1	1	0	9
1656	11	1	1	1	1	1	1	1	1	1	1	1	11
1657	7	1	0	1	1	1	0	1	1	1	0	0	7
1658	11	1	1	1	1	1	1	2	1	1	1	0	10
1659	10	1	1	1	1	1	1	1	1	1	1	0	10
1660	11	1	1	1	1	1	1	1	1	1	1	1	11
1661	13	1	1	1	1	1	1	1	1	1	1	3	11
1662	22	2	2	2	2	2	2	2	2	2	2	2	11
1663	22	1	2	3	3	2	1	1	3	2	3	1	11
1664	6	1	0	1	1	0	0	1	1	0	1	0	6
1665	5	0	1	1	1	1	0	0	1	0	0	0	5
1666	8	0	0	2	2	1	1	0	2	0	0	0	5
1667	4	0	0	1	1	0	0	0	1	0	0	1	4
1668	11	1	1	1	1	1	1	1	1	1	1	1	11
1669	12	1	1	1	1	1	1	1	1	1	0	3	10
1670	2	0	0	0	0	0	0	0	0	0	0	2	1
1671	25	2	2	2	2	2	2	2	2	2	2	5	11
1672	8	1	1	1	1	1	0	1	1	1	0	0	8
1673	12	1	1	1	1	1	1	1	2	1	1	1	11
1674	11	1	1	1	1	1	1	1	1	1	1	1	11
1675	8	0	0	2	2	1	1	0	2	0	0	0	5
1676	10	1	1	1	1	1	1	1	1	1	1	0	10
1677	2	0	0	1	0	0	0	0	1	0	0	0	2
1678	3	0	0	1	1	0	0	0	1	0	0	0	3
1679	8	1	0	1	1	1	0	1	1	1	0	1	8
1680	11	1	1	1	1	1	1	1	1	1	1	1	11
1681	7	1	0	1	1	1	0	1	1	1	0	0	7
1682	10	1	1	1	1	1	1	1	1	1	1	0	10
1683	9	1	1	1	1	1	0	1	1	1	1	0	9
1684	2	0	0	1	0	0	0	0	1	0	0	0	2
1685	22	2	2	2	2	2	2	2	2	2	2	2	11
1686	4	0	0	1	1	0	1	0	1	0	0	0	4
1687	14	0	2	2	2	0	2	0	2	0	0	4	6
1688	9	1	1	1	1	1	1	1	1	1	0	0	9
1689	11	1	1	1	1	1	1	1	1	1	1	1	11
1690	11	1	1	1	1	1	1	1	1	1	1	1	11
1691	10	1	1	1	1	1	1	1	1	1	1	0	10
1692	4	0	0	1	1	0	0	1	1	0	0	0	4
1693	8	0	1	1	1	1	1	1	1	0	1	0	8
1694	12	1	1	1	1	1	1	1	1	1	1	2	11
1695	11	1	1	1	1	1	1	1	1	1	1	1	11
1696	3	0	0	1	1	0	0	0	1	0	0	0	3
1697	5	0	1	1	1	1	0	0	1	0	0	0	5
1698	10	1	1	1	1	1	1	1	1	1	0	1	10
1699	4	0	0	1	1	0	1	0	1	0	0	0	4
1700	20	2	2	2	2	2	2	2	2	2	1	1	11
1701	11	1	1	1	1	1	1	1	1	1	1	1	11
1702	10	1	1	1	1	1	1	1	1	1	0	1	10
1703	11	1	1	1	1	1	1	1	1	1	1	1	11
1704	3	0	0	1	1	0	0	0	1	0	0	0	3
1705	7	0	1	2	2	0	0	0	2	0	0	0	4
1706	3	0	0	1	1	0	0	0	1	0	0	0	3
1707	13	1	1	1	1	1	1	1	1	1	1	3	11
1708	11	1	1	1	1	1	1	1	1	1	1	1	11
1709	10	1	1	1	1	1	1	1	1	1	0	1	10
1710	11	1	1	1	1	1	1	1	1	1	1	1	11
1711	11	1	0	1	1	2	0	1	1	1	2	1	9
1712	6	0	0	1	1	1	1	0	1	0	1	0	6
1713	4	1	0	0	0	1	0	1	0	1	0	0	4
1714	11	1	1	1	1	1	1	1	1	1	1	1	11
1715	11	1	1	1	1	1	1	1	1	1	1	1	11
1716	10	1	1	1	1	1	1	1	1	1	1	0	10
1717	8	0	0	2	2	1	1	0	2	0	0	0	5
1718	9	1	1	1	1	1	1	1	1	1	0	0	9
1719	12	1	1	1	1	1	1	1	1	1	1	2	11
1720	12	1	1	1	1	2	2	1	1	0	1	1	10
1721	5	0	0	1	1	0	1	1	1	0	0	0	5
1722	13	1	1	1	1	1	1	1	1	1	1	3	11
1723	3	0	0	1	1	0	0	0	1	0	0	0	3
1724	10	1	1	1	1	1	1	1	1	1	1	0	10
1725	11	1	1	1	1	1	1	1	1	1	1	1	11
1726	9	1	1	1	1	1	1	1	1	0	1	0	9
1727	10	1	1	1	1	1	1	1	1	1	0	1	10
1728	10	1	1	1	1	1	1	1	1	1	1	0	10
1729	10	1	1	1	1	1	1	1	1	1	1	0	10
1730	10	1	1	1	1	1	1	1	1	1	1	0	10
1731	11	1	1	1	1	1	1	1	1	1	1	1	11
1732	10	1	1	1	1	1	1	1	1	1	1	0	10
1733	11	1	1	1	1	1	1	1	1	1	1	1	11
1734	10	1	1	1	1	1	1	1	1	1	1	0	10
1735	22	2	2	2	2	2	2	2	2	2	2	2	11
1736	11	1	1	1	1	1	1	1	1	1	1	1	11
1737	10	1	1	1	1	1	1	1	1	1	1	0	10
1738	10	0	1	1	1	1	1	1	1	0	1	2	9
1739	11	1	1	1	1	1	1	1	1	1	1	1	11
1740	10	1	1	1	1	1	1	1	1	1	1	0	10
1741	11	1	1	1	1	1	1	1	1	1	1	1	11
1742	10	1	1	1	1	1	1	1	1	1	1	0	10
1743	9	1	1	1	1	1	1	1	1	1	0	0	9
1744	7	1	0	1	1	1	0	0	1	1	1	0	7
1745	8	1	1	1	1	1	0	1	1	1	0	0	8
1746	11	1	1	1	1	1	1	1	1	1	1	1	11
1747	10	1	1	1	1	1	1	1	1	1	1	0	10
1748	9	1	1	1	1	1	1	1	1	1	0	0	9
1749	7	1	0	1	1	1	0	1	1	1	0	0	7
1750	3	0	0	1	1	0	0	0	1	0	0	0	3
1751	11	1	1	1	1	1	1	1	1	1	1	1	11
1752	11	1	1	1	1	1	1	1	1	1	1	1	11
1753	11	1	1	1	1	1	1	1	1	1	1	1	11
1754	11	1	1	1	1	1	1	1	1	1	1	1	11
1755	11	1	1	1	1	1	1	1	1	1	1	1	11
1756	16	1	1	1	2	1	1	1	2	1	2	3	11
1757	12	1	1	1	1	1	1	1	1	1	1	2	11
1758	11	1	1	1	1	1	1	1	1	1	1	1	11
1759	8	1	0	1	1	1	1	1	1	1	0	0	8
1760	11	1	1	1	1	1	1	1	1	1	1	1	11
1761	11	1	1	1	1	1	1	1	1	1	1	1	11
1762	11	1	1	1	1	1	1	1	1	1	1	1	11
1763	11	1	1	1	1	1	1	1	1	1	1	1	11
1764	12	1	1	1	1	1	1	1	1	1	1	2	11
1765	9	1	1	1	1	1	1	1	1	1	0	0	9
1766	10	1	1	1	1	1	1	1	1	1	1	0	10
1767	9	1	1	1	1	1	1	1	1	1	0	0	9
1768	21	2	2	2	2	2	2	2	2	2	2	1	11
1769	12	1	0	2	2	1	1	1	2	1	1	0	9
1770	11	1	1	1	1	1	1	1	1	1	1	1	11
1771	11	1	1	1	1	1	1	1	1	1	1	1	11
1772	4	0	0	1	1	0	0	1	1	0	0	0	4
1773	10	1	1	1	1	1	1	1	1	1	1	0	10
1774	9	1	1	1	1	1	0	1	1	1	1	0	9
1775	3	0	0	1	1	0	0	0	1	0	0	0	3
1776	10	1	1	1	1	1	1	1	1	1	1	0	10
1777	10	1	1	1	1	1	1	1	1	1	1	0	10
1778	10	1	1	1	1	1	1	1	1	1	1	0	10
1779	10	1	1	1	1	1	1	1	1	1	1	0	10
1780	4	0	0	1	1	0	0	1	1	0	0	0	4
1781	5	0	0	1	1	1	0	1	1	0	0	0	5
1782	8	1	1	1	1	1	0	1	1	1	0	0	8
1783	11	1	1	1	1	1	1	1	1	1	1	1	11
1784	11	1	1	1	1	1	1	1	1	1	1	1	11
1785	11	1	1	1	1	1	1	1	1	1	1	1	11
1786	10	1	1	1	1	1	1	1	1	1	1	0	10
1787	11	1	1	1	1	1	1	1	1	1	1	1	11
1788	11	1	1	1	1	1	1	1	1	1	1	1	11
1789	9	1	1	1	1	1	1	0	1	1	1	0	9
1790	21	2	2	2	2	2	2	2	2	2	2	1	11
1791	11	1	1	1	1	1	1	1	1	1	1	1	11
1792	5	0	1	1	1	1	0	0	1	0	0	0	5
1793	11	1	1	1	1	1	1	1	1	1	1	1	11
1794	10	1	0	1	1	1	1	1	1	1	1	1	10
1795	11	1	1	1	1	1	1	1	1	1	1	1	11
1796	7	0	0	1	1	2	1	1	1	0	0	0	6
1797	8	1	0	1	1	1	1	1	1	1	0	0	8
1798	11	1	1	1	1	1	1	1	1	1	1	1	11
1799	11	1	1	1	1	1	1	1	1	1	1	1	11
1800	11	1	1	1	1	1	1	1	1	1	1	1	11
1801	3	0	0	1	1	0	0	0	1	0	0	0	3
1802	13	1	1	1	1	1	2	2	1	1	1	1	11
1803	10	1	1	1	1	1	1	1	1	1	1	0	10
1804	11	1	1	1	1	1	1	1	1	1	1	1	11
1805	6	0	1	1	1	0	1	0	1	0	0	1	6
1806	10	1	1	1	1	1	1	1	1	1	1	0	10
1807	11	1	1	1	1	1	1	1	1	1	1	1	11
1808	8	1	0	1	1	0	1	1	1	0	1	1	8
1809	10	1	1	1	1	1	1	1	1	1	1	0	10
1810	13	1	1	1	1	1	1	1	1	1	1	3	11
1811	11	1	1	1	1	1	1	1	1	1	1	1	11
1812	11	1	1	1	1	1	1	1	1	1	1	1	11
1813	10	1	1	1	1	1	1	1	1	1	1	0	10
1814	11	1	1	1	1	1	1	1	1	1	1	1	11
1815	10	1	1	1	1	1	1	1	1	1	1	0	10
1816	11	1	1	1	1	1	1	1	1	1	1	1	11
1817	11	1	1	1	1	1	1	1	1	1	1	1	11
1818	10	1	1	1	1	1	1	1	1	1	1	0	10
1819	11	1	1	1	1	1	1	1	1	1	1	1	11
1820	5	0	0	1	1	0	1	0	1	0	1	0	5
1821	11	1	1	1	1	1	1	1	1	1	1	1	11
1822	11	1	1	1	1	1	1	1	1	1	1	1	11
1823	10	1	1	1	1	1	1	1	1	1	1	0	10
1824	11	1	1	1	1	1	1	1	1	1	1	1	11
1825	11	1	1	1	1	1	1	1	1	1	1	1	11
1826	11	1	1	1	1	1	1	1	1	1	1	1	11
1827	11	1	1	1	1	1	1	1	1	1	1	1	11
1828	11	1	1	1	1	1	1	1	1	1	1	1	11
1829	11	1	1	1	1	1	1	1	1	1	1	1	11
1830	11	1	1	1	1	1	1	1	1	1	1	1	11
1831	9	1	1	1	1	1	1	1	1	1	0	0	9
1832	11	1	1	1	1	1	1	1	1	1	1	1	11
1833	11	1	1	1	1	1	1	1	1	1	1	1	11
1834	11	1	1	1	1	1	1	1	1	1	1	1	11
1835	3	0	0	1	1	0	0	0	1	0	0	0	3
1836	10	1	1	1	1	1	1	1	1	1	1	0	10
1837	11	1	1	1	1	1	1	1	1	1	1	1	11
1838	11	1	1	1	1	1	1	1	1	1	1	1	11
1839	10	1	1	1	1	1	1	1	1	1	1	0	10
1840	23	2	2	2	2	2	2	2	2	2	2	3	11
1841	10	1	1	1	1	1	1	1	1	1	1	0	10
1842	8	1	1	1	1	1	0	1	1	1	0	0	8
1843	3	0	0	1	1	0	0	0	1	0	0	0	3
1844	11	1	1	1	1	1	1	1	1	1	1	1	11
1845	11	1	1	1	1	1	1	1	1	1	1	1	11
1846	11	1	1	1	1	1	1	1	1	1	1	1	11
1847	9	1	1	1	1	1	1	1	1	1	0	0	9
1848	11	1	1	1	1	1	1	1	1	1	1	1	11
1849	9	1	1	1	1	1	1	1	1	1	0	0	9
1850	12	1	1	1	1	1	1	1	1	1	2	1	11
1851	11	1	1	1	1	1	1	1	1	1	1	1	11
1852	7	1	1	1	1	1	0	1	1	0	0	0	7
1853	17	3	1	2	2	2	0	2	2	2	1	0	9
1854	4	0	0	1	1	1	0	0	1	0	0	0	4
1855	2	0	0	1	0	0	0	0	1	0	0	0	2
1856	9	1	1	1	1	1	1	1	1	1	0	0	9
1857	9	1	1	1	1	1	1	1	1	1	0	0	9
1858	12	1	1	1	1	1	1	1	1	1	1	2	11
1859	9	1	1	1	1	1	1	1	1	1	0	0	9
1860	10	1	1	1	1	1	1	1	1	1	1	0	10
1861	8	0	0	2	2	1	1	0	2	0	0	0	5
1862	4	0	0	1	1	1	0	0	1	0	0	0	4
1863	11	1	1	1	1	1	1	1	1	1	1	1	11
1864	9	1	1	1	1	1	1	1	1	0	0	1	9
1865	5	0	0	1	1	1	0	0	1	1	0	0	5
1866	12	1	1	1	1	1	1	1	1	1	1	2	11
1867	3	0	0	1	1	0	0	0	1	0	0	0	3
1868	4	0	1	1	1	0	0	0	1	0	0	0	4
1869	11	1	1	1	1	1	1	1	1	1	1	1	11
1870	3	0	0	1	1	0	0	0	1	0	0	0	3
1871	12	1	1	1	1	1	1	1	1	1	1	2	11
1872	5	0	0	1	1	1	1	0	1	0	0	0	5
1873	10	1	1	1	1	1	1	1	1	1	1	0	10
1874	10	1	1	1	1	1	1	1	1	1	1	0	10
1875	11	1	1	1	1	1	1	1	1	1	1	1	11
1876	11	1	1	1	1	1	1	1	1	1	1	1	11
1877	12	1	1	1	1	1	1	1	1	1	1	2	11
1878	21	2	2	2	2	2	2	2	2	2	2	1	11
1879	6	0	1	1	1	1	0	1	1	0	0	0	6
1880	11	1	1	1	1	1	1	1	1	1	1	1	11
1881	11	1	1	1	1	1	1	1	1	1	1	1	11
1882	11	1	1	1	1	1	1	1	1	1	1	1	11
1883	10	1	1	1	1	1	1	1	1	1	1	0	10
1884	11	1	1	1	1	1	1	1	1	1	1	1	11
1885	11	1	1	1	1	1	1	1	1	1	1	1	11
1886	11	1	1	1	1	1	1	1	1	1	1	1	11
1887	3	0	0	1	1	0	0	0	1	0	0	0	3
1888	11	1	1	1	1	1	1	1	1	1	1	1	11
1889	11	1	1	1	1	1	0	1	1	1	1	2	10
1890	8	0	0	2	2	1	1	0	2	0	0	0	5
1891	11	1	1	1	1	1	1	1	1	1	1	1	11
1892	10	1	1	1	1	1	1	1	1	1	1	0	10
1893	11	1	1	1	1	1	1	1	1	1	1	1	11
1894	2	0	0	0	0	1	0	0	0	1	0	0	2
1895	9	1	1	1	1	1	1	1	1	1	0	0	9
1896	5	0	1	1	1	1	0	0	1	0	0	0	5
1897	11	1	1	1	1	1	1	1	1	1	1	1	11
1898	19	2	2	2	2	2	1	3	2	1	2	0	10
1899	11	1	1	1	1	1	1	1	1	1	1	1	11
1900	11	1	1	1	1	1	1	1	1	1	1	1	11
1901	10	1	1	1	1	1	1	1	1	1	1	0	10
1902	11	1	1	1	1	1	1	1	1	1	1	1	11
1903	11	1	1	1	1	1	1	1	1	1	1	1	11
1904	3	0	0	1	1	0	0	0	1	0	0	0	3
1905	6	0	1	1	1	1	0	1	1	0	0	0	6
1906	11	1	1	1	1	1	1	1	1	1	1	1	11
1907	11	1	1	1	1	1	1	1	1	1	1	1	11
1908	11	1	1	1	1	1	1	1	1	1	1	1	11
1909	11	1	1	1	1	1	1	1	1	1	1	1	11
1910	11	1	1	1	1	1	1	1	1	1	1	1	11
1911	11	1	1	1	1	1	1	1	1	1	1	1	11
1912	5	0	0	1	1	1	1	0	1	0	0	0	5
1913	11	1	1	1	1	1	1	1	1	1	1	1	11
1914	3	0	0	1	1	0	0	0	1	0	0	0	3
1915	10	1	1	1	1	1	1	1	1	1	1	0	10
1916	10	1	1	1	1	1	1	1	1	1	1	0	10
1917	34	3	3	3	3	3	3	3	3	3	3	4	11
1918	11	1	1	1	1	1	1	1	1	1	1	1	11
1919	9	1	1	1	1	1	1	0	1	1	1	0	9
1920	11	1	1	1	1	1	1	1	1	1	1	1	11
1921	13	1	1	1	1	1	1	1	1	1	1	3	11
1922	2	0	0	0	0	0	0	0	0	0	0	2	1
1923	11	1	1	1	1	1	1	1	1	1	1	1	11
1924	11	1	1	1	1	1	1	1	1	1	1	1	11
1925	9	1	0	1	1	1	1	1	1	1	1	0	9
1926	11	1	1	1	1	1	1	1	1	1	1	1	11
1927	10	1	1	1	1	1	1	1	1	1	1	0	10
1928	11	1	1	1	1	1	1	1	1	1	1	1	11
1929	10	1	1	1	1	1	1	1	1	1	1	0	10
1930	5	1	0	0	0	1	1	1	0	1	0	0	5
1931	6	0	1	1	1	1	0	1	1	0	0	0	6
1932	11	1	1	1	1	1	1	1	1	1	1	1	11
1933	10	1	1	1	1	1	1	1	1	1	1	0	10
1934	11	1	1	1	1	1	1	1	1	1	1	1	11
1935	10	1	1	1	1	1	1	1	1	1	1	0	10
1936	5	0	0	1	1	1	1	0	1	0	0	0	5
1937	11	1	1	1	1	1	1	1	1	1	1	1	11
1938	11	1	1	1	1	1	1	1	1	1	1	1	11
1939	10	1	1	1	1	1	1	1	1	1	1	0	10
1940	11	1	1	1	1	1	1	1	1	1	1	1	11
1941	11	1	1	1	1	1	1	1	1	1	1	1	11
1942	11	1	1	1	1	1	1	1	1	1	1	1	11
1943	8	1	1	1	1	1	0	1	1	1	0	0	8
1944	5	0	0	1	1	1	1	0	1	0	0	0	5
1945	11	1	1	1	1	1	1	1	1	1	1	1	11
1946	15	1	1	2	2	1	1	2	2	1	1	1	11
1947	9	1	1	1	1	1	1	1	1	1	0	0	9
1948	10	1	1	1	1	1	1	1	1	1	1	0	10
1949	5	0	1	1	1	1	0	0	1	0	0	0	5
1950	9	1	0	1	1	1	0	1	1	1	1	1	9
1951	8	1	1	1	1	1	0	1	1	1	0	0	8
1952	11	1	1	1	1	1	1	1	1	1	1	1	11
1953	6	0	1	1	1	1	0	1	1	0	0	0	6
1954	11	1	1	1	1	1	1	1	1	1	1	1	11
1955	9	1	1	1	1	1	1	1	1	1	0	0	9
1956	11	1	1	1	1	1	1	1	1	1	1	1	11
1957	11	1	1	1	1	1	1	1	1	1	1	1	11
1958	6	0	0	1	1	1	1	0	1	1	0	0	6
1959	11	1	1	1	1	1	1	1	1	1	1	1	11
1960	9	1	1	1	1	1	1	1	1	1	0	0	9
1961	11	1	1	1	1	1	1	2	1	1	1	0	10
1962	7	1	0	1	1	1	0	1	1	1	0	0	7
1963	2	0	0	0	0	0	0	0	0	0	0	2	1
1964	10	1	1	1	1	1	1	1	1	1	0	1	10
1965	11	1	1	1	1	1	1	1	1	1	1	1	11
1966	11	1	1	1	1	1	1	1	1	1	1	1	11
1967	11	1	1	1	1	1	1	1	1	1	1	1	11
1968	6	0	1	1	1	1	0	1	1	0	0	0	6
1969	11	1	1	1	1	1	1	1	1	1	1	1	11
1970	11	1	1	1	1	1	1	1	1	1	1	1	11
1971	4	0	0	1	1	0	0	0	1	0	1	0	4
1972	11	1	1	1	1	1	1	1	1	1	1	1	11
1973	11	2	0	1	1	0	1	1	1	1	2	1	9
1974	4	0	0	1	1	1	0	0	1	0	0	0	4
1975	11	1	1	1	1	1	1	1	1	1	1	1	11
1976	7	0	0	1	1	0	1	1	1	1	1	0	7
1977	11	1	1	1	1	1	1	1	1	1	1	1	11
1978	10	1	1	1	1	1	1	1	1	1	1	0	10
1979	11	1	1	1	1	1	1	1	1	1	1	1	11
1980	10	1	1	1	1	1	1	1	1	1	1	0	10
1981	8	1	1	1	1	1	0	1	1	1	0	0	8
1982	11	1	1	1	1	1	1	1	1	1	1	1	11
1983	10	1	1	1	1	1	1	1	1	1	1	0	10
1984	12	1	1	1	1	1	1	1	2	1	1	1	11
1985	6	0	0	1	1	2	1	0	1	0	0	0	5
1986	12	1	1	1	1	1	1	1	1	1	1	2	11
1987	11	1	1	1	1	1	1	1	1	1	1	1	11
1988	10	1	1	1	1	1	1	1	1	1	1	0	10
1989	10	1	1	1	1	1	1	1	1	1	1	0	10
1990	11	1	1	1	1	1	1	1	1	1	2	0	10
1991	7	1	1	1	1	1	1	0	1	0	0	0	7
1992	13	1	2	1	1	1	1	2	1	1	1	1	11
1993	11	1	1	1	1	1	1	1	1	1	1	1	11
1994	5	1	0	1	1	0	0	1	1	0	0	0	5
1995	6	0	1	1	1	1	0	1	1	0	0	0	6
1996	10	1	1	1	1	1	1	1	1	1	1	0	10
1997	11	1	1	1	1	1	2	1	1	1	1	0	10
1998	10	1	1	1	1	1	0	1	1	1	1	1	10
[truncated: 496 more rows]
