# Supplementary material for: Comparative genomic analysis of Lacticaseibacillus paracasei SMN-LBK from koumiss
Source: Front Microbiol. 2022 Oct 18;13:1042117. doi: 10.3389/fmicb.2022.1042117 (PMC9622802; doi:10.3389/fmicb.2022.1042117)
Supplement: Supplementary file 7 [file Table_2.XLSX]

## Sheet: Sheet1
Supplementary Table 2. Specific genes of L. paracasei SMN-LBK
Gene	Ko_name	Ko_defi
>Lacticaseibacillus_paracasei_SMN-LBK_GM000026 locus=Chr1:27023:27226:+	ABC.CD.P	putative ABC transport system permease protein
>Lacticaseibacillus_paracasei_SMN-LBK_GM000155 locus=Chr1:173626:173826:+
>Lacticaseibacillus_paracasei_SMN-LBK_GM000334 locus=Chr1:366861:367229:+	ykoE	energy-coupling factor transport system substrate-specific component
>Lacticaseibacillus_paracasei_SMN-LBK_GM000339 locus=Chr1:376451:377131:-	thiM	hydroxyethylthiazole kinase
>Lacticaseibacillus_paracasei_SMN-LBK_GM000343 locus=Chr1:380259:381746:+
>Lacticaseibacillus_paracasei_SMN-LBK_GM000354 locus=Chr1:391498:392157:+
>Lacticaseibacillus_paracasei_SMN-LBK_GM000392 locus=Chr1:429629:430522:-	penP	beta-lactamase class A
>Lacticaseibacillus_paracasei_SMN-LBK_GM000411 locus=Chr1:452768:453547:-	PTS-Ntr-EIIA, ptsN	PTS system, nitrogen regulatory IIA component
>Lacticaseibacillus_paracasei_SMN-LBK_GM000412 locus=Chr1:453756:454559:+	FBA, fbaA	fructose-bisphosphate aldolase, class II
>Lacticaseibacillus_paracasei_SMN-LBK_GM000413 locus=Chr1:454690:456546:+	PTS-Fru-EIIA, fruB	PTS system, fructose-specific IIA component
>Lacticaseibacillus_paracasei_SMN-LBK_GM000414 locus=Chr1:456628:457803:+	PTS-Fru-EIIB, fruA	PTS system, fructose-specific IIB component
>Lacticaseibacillus_paracasei_SMN-LBK_GM000415 locus=Chr1:458639:459283:+	PTS-Fru-EIIC, fruA	PTS system, fructose-specific IIC component
>Lacticaseibacillus_paracasei_SMN-LBK_GM000479 locus=Chr1:529104:532061:-
>Lacticaseibacillus_paracasei_SMN-LBK_GM000480 locus=Chr1:532058:535777:-	ABC.CD.P	putative ABC transport system permease protein
>Lacticaseibacillus_paracasei_SMN-LBK_GM000516 locus=Chr1:575052:576026:+	E1.2.3.3, poxL	pyruvate oxidase
>Lacticaseibacillus_paracasei_SMN-LBK_GM000525 locus=Chr1:580864:582471:+
>Lacticaseibacillus_paracasei_SMN-LBK_GM000526 locus=Chr1:582490:582966:+
>Lacticaseibacillus_paracasei_SMN-LBK_GM000527 locus=Chr1:582966:584867:+	licR	lichenan operon transcriptional antiterminator
>Lacticaseibacillus_paracasei_SMN-LBK_GM000528 locus=Chr1:584915:585091:+
>Lacticaseibacillus_paracasei_SMN-LBK_GM000529 locus=Chr1:585111:585944:+
>Lacticaseibacillus_paracasei_SMN-LBK_GM000530 locus=Chr1:586025:586333:+
>Lacticaseibacillus_paracasei_SMN-LBK_GM000531 locus=Chr1:586341:588737:+
>Lacticaseibacillus_paracasei_SMN-LBK_GM000532 locus=Chr1:588727:591204:+
>Lacticaseibacillus_paracasei_SMN-LBK_GM000533 locus=Chr1:591281:591742:+	ABC-2.A	ABC-2 type transport system ATP-binding protein
>Lacticaseibacillus_paracasei_SMN-LBK_GM000534 locus=Chr1:591760:591990:+
>Lacticaseibacillus_paracasei_SMN-LBK_GM000535 locus=Chr1:591990:593171:+
>Lacticaseibacillus_paracasei_SMN-LBK_GM000536 locus=Chr1:593189:594163:+
>Lacticaseibacillus_paracasei_SMN-LBK_GM000537 locus=Chr1:594251:594526:+
>Lacticaseibacillus_paracasei_SMN-LBK_GM000538 locus=Chr1:594773:595174:+
>Lacticaseibacillus_paracasei_SMN-LBK_GM000539 locus=Chr1:595146:597353:+
>Lacticaseibacillus_paracasei_SMN-LBK_GM000540 locus=Chr1:597398:598789:+
>Lacticaseibacillus_paracasei_SMN-LBK_GM000542 locus=Chr1:600621:601379:+
>Lacticaseibacillus_paracasei_SMN-LBK_GM000543 locus=Chr1:601542:603170:+
>Lacticaseibacillus_paracasei_SMN-LBK_GM000544 locus=Chr1:603183:603953:+	pepN	aminopeptidase N
>Lacticaseibacillus_paracasei_SMN-LBK_GM000545 locus=Chr1:603950:604453:+
>Lacticaseibacillus_paracasei_SMN-LBK_GM000548 locus=Chr1:605983:606942:+
>Lacticaseibacillus_paracasei_SMN-LBK_GM000549 locus=Chr1:607060:607446:-
>Lacticaseibacillus_paracasei_SMN-LBK_GM000550 locus=Chr1:607439:607681:-	aroE	shikimate dehydrogenase
>Lacticaseibacillus_paracasei_SMN-LBK_GM000552 locus=Chr1:609578:610837:-	aroE	shikimate dehydrogenase
>Lacticaseibacillus_paracasei_SMN-LBK_GM000554 locus=Chr1:612464:615631:-	cysK	cysteine synthase
>Lacticaseibacillus_paracasei_SMN-LBK_GM000555 locus=Chr1:616249:616680:+
>Lacticaseibacillus_paracasei_SMN-LBK_GM000556 locus=Chr1:617195:618001:+
>Lacticaseibacillus_paracasei_SMN-LBK_GM000559 locus=Chr1:620409:621440:+
>Lacticaseibacillus_paracasei_SMN-LBK_GM000560 locus=Chr1:621600:621992:-
>Lacticaseibacillus_paracasei_SMN-LBK_GM000566 locus=Chr1:627103:627234:+
>Lacticaseibacillus_paracasei_SMN-LBK_GM000568 locus=Chr1:628588:629175:-
>Lacticaseibacillus_paracasei_SMN-LBK_GM000569 locus=Chr1:629252:629530:+
>Lacticaseibacillus_paracasei_SMN-LBK_GM000570 locus=Chr1:629530:629904:+
>Lacticaseibacillus_paracasei_SMN-LBK_GM000574 locus=Chr1:633472:634680:+
>Lacticaseibacillus_paracasei_SMN-LBK_GM000575 locus=Chr1:634685:635356:+
>Lacticaseibacillus_paracasei_SMN-LBK_GM000576 locus=Chr1:635460:636176:-
>Lacticaseibacillus_paracasei_SMN-LBK_GM000577 locus=Chr1:636577:636705:+	dnaC	DNA replication protein DnaC
>Lacticaseibacillus_paracasei_SMN-LBK_GM000583 locus=Chr1:640861:641142:-
>Lacticaseibacillus_paracasei_SMN-LBK_GM000585 locus=Chr1:642306:642671:+
>Lacticaseibacillus_paracasei_SMN-LBK_GM000587 locus=Chr1:645264:645530:-
>Lacticaseibacillus_paracasei_SMN-LBK_GM000591 locus=Chr1:650145:650816:+
>Lacticaseibacillus_paracasei_SMN-LBK_GM000598 locus=Chr1:659233:659718:+	virD4, lvhD4	type IV secretion system protein VirD4
>Lacticaseibacillus_paracasei_SMN-LBK_GM000599 locus=Chr1:660029:660196:+
>Lacticaseibacillus_paracasei_SMN-LBK_GM000600 locus=Chr1:660685:660966:+
>Lacticaseibacillus_paracasei_SMN-LBK_GM000601 locus=Chr1:661809:662918:-
>Lacticaseibacillus_paracasei_SMN-LBK_GM000602 locus=Chr1:662920:664272:-
>Lacticaseibacillus_paracasei_SMN-LBK_GM000609 locus=Chr1:672389:673036:+
>Lacticaseibacillus_paracasei_SMN-LBK_GM000617 locus=Chr1:681169:681528:-
>Lacticaseibacillus_paracasei_SMN-LBK_GM000619 locus=Chr1:682329:682628:-
>Lacticaseibacillus_paracasei_SMN-LBK_GM000680 locus=Chr1:755369:755530:+	dinJ	DNA-damage-inducible protein J
>Lacticaseibacillus_paracasei_SMN-LBK_GM000681 locus=Chr1:758150:758428:-
>Lacticaseibacillus_paracasei_SMN-LBK_GM000682 locus=Chr1:759415:759534:-
>Lacticaseibacillus_paracasei_SMN-LBK_GM000766 locus=Chr1:848242:848436:-	amt, AMT, MEP	ammonium transporter, Amt family
>Lacticaseibacillus_paracasei_SMN-LBK_GM000777 locus=Chr1:857852:857959:-
>Lacticaseibacillus_paracasei_SMN-LBK_GM000873 locus=Chr1:974257:974637:+	pip	proline iminopeptidase
>Lacticaseibacillus_paracasei_SMN-LBK_GM000936 locus=Chr1:1042379:1042480:+	birA	BirA family transcriptional regulator, biotin operon repressor / biotin---[acetyl-CoA-carboxylase] ligase
>Lacticaseibacillus_paracasei_SMN-LBK_GM000952 locus=Chr1:1059668:1060261:+
>Lacticaseibacillus_paracasei_SMN-LBK_GM000953 locus=Chr1:1060245:1061345:+
>Lacticaseibacillus_paracasei_SMN-LBK_GM000991 locus=Chr1:1102393:1102512:-	tagE	poly(glycerol-phosphate) alpha-glucosyltransferase
>Lacticaseibacillus_paracasei_SMN-LBK_GM001013 locus=Chr1:1121139:1121546:-
>Lacticaseibacillus_paracasei_SMN-LBK_GM001014 locus=Chr1:1121909:1122187:+	trmL, cspR	tRNA (cytidine/uridine-2'-O-)-methyltransferase
>Lacticaseibacillus_paracasei_SMN-LBK_GM001015 locus=Chr1:1122255:1122476:+
>Lacticaseibacillus_paracasei_SMN-LBK_GM001020 locus=Chr1:1125810:1126232:+	fabG	3-oxoacyl-[acyl-carrier protein] reductase
>Lacticaseibacillus_paracasei_SMN-LBK_GM001056 locus=Chr1:1161558:1161788:+
>Lacticaseibacillus_paracasei_SMN-LBK_GM001112 locus=Chr1:1225367:1225738:-	potD	spermidine/putrescine transport system substrate-binding protein
>Lacticaseibacillus_paracasei_SMN-LBK_GM001113 locus=Chr1:1226172:1226396:+
>Lacticaseibacillus_paracasei_SMN-LBK_GM001114 locus=Chr1:1227248:1227763:-
>Lacticaseibacillus_paracasei_SMN-LBK_GM001115 locus=Chr1:1227985:1228671:-
>Lacticaseibacillus_paracasei_SMN-LBK_GM001116 locus=Chr1:1228746:1229141:-
>Lacticaseibacillus_paracasei_SMN-LBK_GM001117 locus=Chr1:1229833:1230264:-	ABC-2.P	ABC-2 type transport system permease protein
>Lacticaseibacillus_paracasei_SMN-LBK_GM001118 locus=Chr1:1230400:1230642:+	ABC-2.A	ABC-2 type transport system ATP-binding protein
>Lacticaseibacillus_paracasei_SMN-LBK_GM001119 locus=Chr1:1230639:1230953:+
>Lacticaseibacillus_paracasei_SMN-LBK_GM001120 locus=Chr1:1231324:1231482:-	dacA	diadenylate cyclase
>Lacticaseibacillus_paracasei_SMN-LBK_GM001121 locus=Chr1:1231846:1232160:-
>Lacticaseibacillus_paracasei_SMN-LBK_GM001122 locus=Chr1:1233299:1233502:+	glmM	phosphoglucosamine mutase
>Lacticaseibacillus_paracasei_SMN-LBK_GM001123 locus=Chr1:1233502:1233849:+	glmS, GFPT	glucosamine---fructose-6-phosphate aminotransferase (isomerizing)
>Lacticaseibacillus_paracasei_SMN-LBK_GM001124 locus=Chr1:1233842:1234567:+
>Lacticaseibacillus_paracasei_SMN-LBK_GM001136 locus=Chr1:1240278:1240388:+
>Lacticaseibacillus_paracasei_SMN-LBK_GM001138 locus=Chr1:1240902:1241039:+
>Lacticaseibacillus_paracasei_SMN-LBK_GM001140 locus=Chr1:1241237:1241482:+
>Lacticaseibacillus_paracasei_SMN-LBK_GM001141 locus=Chr1:1241998:1242087:+
>Lacticaseibacillus_paracasei_SMN-LBK_GM001142 locus=Chr1:1243701:1244918:+	E3.2.1.22B, galA, rafA	alpha-galactosidase
>Lacticaseibacillus_paracasei_SMN-LBK_GM001143 locus=Chr1:1245054:1245638:+
>Lacticaseibacillus_paracasei_SMN-LBK_GM001152 locus=Chr1:1252260:1252358:+
>Lacticaseibacillus_paracasei_SMN-LBK_GM001164 locus=Chr1:1263346:1263489:+
>Lacticaseibacillus_paracasei_SMN-LBK_GM001267 locus=Chr1:1357232:1357339:+
>Lacticaseibacillus_paracasei_SMN-LBK_GM001271 locus=Chr1:1362045:1362401:+
>Lacticaseibacillus_paracasei_SMN-LBK_GM001272 locus=Chr1:1363010:1364764:+
>Lacticaseibacillus_paracasei_SMN-LBK_GM001358 locus=Chr1:1459892:1460059:-	ATPF0C, atpE	F-type H+-transporting ATPase subunit c
>Lacticaseibacillus_paracasei_SMN-LBK_GM001359 locus=Chr1:1460128:1460346:-	ATPF0B, atpF	F-type H+-transporting ATPase subunit b
>Lacticaseibacillus_paracasei_SMN-LBK_GM001360 locus=Chr1:1460545:1460811:-	ATPF1D, atpH	F-type H+-transporting ATPase subunit delta
>Lacticaseibacillus_paracasei_SMN-LBK_GM001361 locus=Chr1:1461082:1461816:-	ATPF1A, atpA	F-type H+-transporting ATPase subunit alpha
>Lacticaseibacillus_paracasei_SMN-LBK_GM001362 locus=Chr1:1461813:1462205:-	ATPF1G, atpG	F-type H+-transporting ATPase subunit gamma
>Lacticaseibacillus_paracasei_SMN-LBK_GM001363 locus=Chr1:1462250:1462633:-	ATPF1B, atpD	F-type H+-transporting ATPase subunit beta
>Lacticaseibacillus_paracasei_SMN-LBK_GM001421 locus=Chr1:1526169:1527884:+	desK	two-component system, NarL family, sensor histidine kinase DesK
>Lacticaseibacillus_paracasei_SMN-LBK_GM001422 locus=Chr1:1527817:1529697:+	ABC-2.P	ABC-2 type transport system permease protein
>Lacticaseibacillus_paracasei_SMN-LBK_GM001423 locus=Chr1:1529666:1531831:+	ABC-2.A	ABC-2 type transport system ATP-binding protein
>Lacticaseibacillus_paracasei_SMN-LBK_GM001424 locus=Chr1:1532036:1532908:-
>Lacticaseibacillus_paracasei_SMN-LBK_GM001462 locus=Chr1:1574204:1574590:-
>Lacticaseibacillus_paracasei_SMN-LBK_GM001463 locus=Chr1:1574612:1574839:-
>Lacticaseibacillus_paracasei_SMN-LBK_GM001549 locus=Chr1:1673209:1673637:-
>Lacticaseibacillus_paracasei_SMN-LBK_GM001566 locus=Chr1:1687909:1689555:-	scpB	segregation and condensation protein B
>Lacticaseibacillus_paracasei_SMN-LBK_GM001567 locus=Chr1:1689997:1690995:+	rluB	23S rRNA pseudouridine2605 synthase
>Lacticaseibacillus_paracasei_SMN-LBK_GM001568 locus=Chr1:1691146:1692657:-
>Lacticaseibacillus_paracasei_SMN-LBK_GM001569 locus=Chr1:1692775:1694277:-	fer	ferredoxin
>Lacticaseibacillus_paracasei_SMN-LBK_GM001570 locus=Chr1:1694358:1695740:-
>Lacticaseibacillus_paracasei_SMN-LBK_GM001571 locus=Chr1:1695885:1697444:-	recQ	ATP-dependent DNA helicase RecQ
>Lacticaseibacillus_paracasei_SMN-LBK_GM001572 locus=Chr1:1697754:1697993:-
>Lacticaseibacillus_paracasei_SMN-LBK_GM001573 locus=Chr1:1698000:1700597:-	cmk	CMP/dCMP kinase
>Lacticaseibacillus_paracasei_SMN-LBK_GM001574 locus=Chr1:1700979:1702334:-	RP-S1, rpsA	small subunit ribosomal protein S1
>Lacticaseibacillus_paracasei_SMN-LBK_GM001575 locus=Chr1:1702309:1710702:-	engA, der	GTPase
>Lacticaseibacillus_paracasei_SMN-LBK_GM001576 locus=Chr1:1711688:1712701:-	hupB	DNA-binding protein HU-beta
>Lacticaseibacillus_paracasei_SMN-LBK_GM001586 locus=Chr1:1721874:1722782:-
>Lacticaseibacillus_paracasei_SMN-LBK_GM001587 locus=Chr1:1722874:1724475:+
>Lacticaseibacillus_paracasei_SMN-LBK_GM001842 locus=Chr1:1995615:1996178:-
>Lacticaseibacillus_paracasei_SMN-LBK_GM001911 locus=Chr1:2070639:2071472:-
>Lacticaseibacillus_paracasei_SMN-LBK_GM001912 locus=Chr1:2071469:2072062:-
>Lacticaseibacillus_paracasei_SMN-LBK_GM001913 locus=Chr1:2072267:2072506:+	PGAM, gpmA	2,3-bisphosphoglycerate-dependent phosphoglycerate mutase
>Lacticaseibacillus_paracasei_SMN-LBK_GM001914 locus=Chr1:2072512:2073042:+	TARS, thrS	threonyl-tRNA synthetase
>Lacticaseibacillus_paracasei_SMN-LBK_GM001915 locus=Chr1:2073242:2073445:+
>Lacticaseibacillus_paracasei_SMN-LBK_GM001918 locus=Chr1:2075990:2077003:+
>Lacticaseibacillus_paracasei_SMN-LBK_GM001919 locus=Chr1:2078936:2079649:-	nrdR	transcriptional repressor NrdR
>Lacticaseibacillus_paracasei_SMN-LBK_GM001920 locus=Chr1:2079683:2080534:-	coaE	dephospho-CoA kinase
>Lacticaseibacillus_paracasei_SMN-LBK_GM001921 locus=Chr1:2080849:2082075:-	mutM, fpg	formamidopyrimidine-DNA glycosylase
>Lacticaseibacillus_paracasei_SMN-LBK_GM001922 locus=Chr1:2082181:2082513:-	polA	DNA polymerase I
>Lacticaseibacillus_paracasei_SMN-LBK_GM001923 locus=Chr1:2082850:2083077:-	K06890	uncharacterized protein
>Lacticaseibacillus_paracasei_SMN-LBK_GM001925 locus=Chr1:2084048:2084287:-	ftsK, spoIIIE	DNA segregation ATPase FtsK/SpoIIIE, S-DNA-T family
>Lacticaseibacillus_paracasei_SMN-LBK_GM001926 locus=Chr1:2084899:2085531:-	K06878	tRNA-binding protein
>Lacticaseibacillus_paracasei_SMN-LBK_GM001927 locus=Chr1:2085609:2090006:-
>Lacticaseibacillus_paracasei_SMN-LBK_GM001928 locus=Chr1:2090086:2091543:-
>Lacticaseibacillus_paracasei_SMN-LBK_GM001990 locus=Chr1:2169339:2170751:+	yydK	GntR family transcriptional regulator, transcriptional regulator of bglA
>Lacticaseibacillus_paracasei_SMN-LBK_GM002000 locus=Chr1:2185923:2186753:-	E2.3.1.9, atoB	acetyl-CoA C-acetyltransferase
>Lacticaseibacillus_paracasei_SMN-LBK_GM002001 locus=Chr1:2188452:2189243:-
>Lacticaseibacillus_paracasei_SMN-LBK_GM002002 locus=Chr1:2190694:2190897:+
>Lacticaseibacillus_paracasei_SMN-LBK_GM002003 locus=Chr1:2191505:2192248:-	mrr	restriction system protein
>Lacticaseibacillus_paracasei_SMN-LBK_GM002004 locus=Chr1:2192439:2192918:-
>Lacticaseibacillus_paracasei_SMN-LBK_GM002024 locus=Chr1:2215344:2216252:-	proC	pyrroline-5-carboxylate reductase
>Lacticaseibacillus_paracasei_SMN-LBK_GM002025 locus=Chr1:2216273:2216827:-
>Lacticaseibacillus_paracasei_SMN-LBK_GM002027 locus=Chr1:2218078:2218467:+	TC.POT	proton-dependent oligopeptide transporter, POT family
>Lacticaseibacillus_paracasei_SMN-LBK_GM002028 locus=Chr1:2218471:2218644:+	ABC.CD.A	putative ABC transport system ATP-binding protein
>Lacticaseibacillus_paracasei_SMN-LBK_GM002031 locus=Chr1:2220154:2220435:-
>Lacticaseibacillus_paracasei_SMN-LBK_GM002055 locus=Chr1:2255950:2256480:-
>Lacticaseibacillus_paracasei_SMN-LBK_GM002105 locus=Chr1:2310656:2310868:-
>Lacticaseibacillus_paracasei_SMN-LBK_GM002115 locus=Chr1:2321091:2321612:-
>Lacticaseibacillus_paracasei_SMN-LBK_GM002116 locus=Chr1:2321609:2323231:-
>Lacticaseibacillus_paracasei_SMN-LBK_GM002126 locus=Chr1:2333311:2333772:-
>Lacticaseibacillus_paracasei_SMN-LBK_GM002128 locus=Chr1:2334807:2335106:-
>Lacticaseibacillus_paracasei_SMN-LBK_GM002140 locus=Chr1:2351369:2351482:-
>Lacticaseibacillus_paracasei_SMN-LBK_GM002149 locus=Chr1:2360765:2362039:-
>Lacticaseibacillus_paracasei_SMN-LBK_GM002150 locus=Chr1:2362316:2363596:-
>Lacticaseibacillus_paracasei_SMN-LBK_GM002152 locus=Chr1:2365559:2366017:-
>Lacticaseibacillus_paracasei_SMN-LBK_GM002153 locus=Chr1:2366590:2367804:-	uvrD, pcrA	DNA helicase II / ATP-dependent DNA helicase PcrA
>Lacticaseibacillus_paracasei_SMN-LBK_GM002154 locus=Chr1:2367797:2369731:-
>Lacticaseibacillus_paracasei_SMN-LBK_GM002155 locus=Chr1:2369739:2372417:-	TC.KEF	monovalent cation:H+ antiporter-2, CPA2 family
>Lacticaseibacillus_paracasei_SMN-LBK_GM002156 locus=Chr1:2372645:2373430:-	pip	proline iminopeptidase
>Lacticaseibacillus_paracasei_SMN-LBK_GM002157 locus=Chr1:2373772:2373918:+
>Lacticaseibacillus_paracasei_SMN-LBK_GM002199 locus=Chr1:2415845:2416042:-	cwlO	peptidoglycan DL-endopeptidase CwlO
>Lacticaseibacillus_paracasei_SMN-LBK_GM002273 locus=Chr1:2494463:2494657:-
>Lacticaseibacillus_paracasei_SMN-LBK_GM002321 locus=Chr1:2550561:2551061:+
>Lacticaseibacillus_paracasei_SMN-LBK_GM002323 locus=Chr1:2552096:2552422:+	abcA, bmrA	ATP-binding cassette, subfamily B, bacterial AbcA/BmrA
>Lacticaseibacillus_paracasei_SMN-LBK_GM002363 locus=Chr1:2592099:2593220:-	ABC-2.A	ABC-2 type transport system ATP-binding protein
>Lacticaseibacillus_paracasei_SMN-LBK_GM002369 locus=Chr1:2598191:2598988:+
>Lacticaseibacillus_paracasei_SMN-LBK_GM002370 locus=Chr1:2599118:2599477:+
>Lacticaseibacillus_paracasei_SMN-LBK_GM002435 locus=Chr1:2649471:2651585:-	maf	septum formation protein
>Lacticaseibacillus_paracasei_SMN-LBK_GM002436 locus=Chr1:2651630:2652721:-	mutL	DNA mismatch repair protein MutL
>Lacticaseibacillus_paracasei_SMN-LBK_GM002437 locus=Chr1:2652718:2657643:-	mutS	DNA mismatch repair protein MutS
>Lacticaseibacillus_paracasei_SMN-LBK_GM002450 locus=Chr1:2684041:2685333:-	ABCF3	ATP-binding cassette, subfamily F, member 3
>Lacticaseibacillus_paracasei_SMN-LBK_GM002463 locus=Chr1:2702109:2702219:+	tmk, DTYMK	dTMP kinase
>Lacticaseibacillus_paracasei_SMN-LBK_GM002599 locus=Chr1:2849659:2849844:+
>Lacticaseibacillus_paracasei_SMN-LBK_GM002601 locus=Chr1:2851053:2851733:+
>Lacticaseibacillus_paracasei_SMN-LBK_GM002616 locus=Chr1:2870628:2871047:-	mntA	manganese/zinc transport system ATP-binding protein
>Lacticaseibacillus_paracasei_SMN-LBK_GM002619 locus=Chr1:2873367:2873693:-	ABC.ZM.S	zinc/manganese transport system substrate-binding protein
>Lacticaseibacillus_paracasei_SMN-LBK_GM002671 locus=Chr1:2924050:2925120:-
>Lacticaseibacillus_paracasei_SMN-LBK_GM002672 locus=Chr1:2925200:2926645:-
>Lacticaseibacillus_paracasei_SMN-LBK_GM002673 locus=Chr1:2926696:2927010:-	RP-L17, MRPL17, rplQ	large subunit ribosomal protein L17
>Lacticaseibacillus_paracasei_SMN-LBK_GM002674 locus=Chr1:2927036:2927506:-	rpoA	DNA-directed RNA polymerase subunit alpha
>Lacticaseibacillus_paracasei_SMN-LBK_GM002676 locus=Chr1:2930537:2931292:-	RP-S13, rpsM	small subunit ribosomal protein S13
>Lacticaseibacillus_paracasei_SMN-LBK_GM002677 locus=Chr1:2931528:2931785:+	infA	translation initiation factor IF-1
>Lacticaseibacillus_paracasei_SMN-LBK_GM002688 locus=Chr1:2943078:2943557:+	RP-L14, MRPL14, rplN	large subunit ribosomal protein L14
>Lacticaseibacillus_paracasei_SMN-LBK_GM002690 locus=Chr1:2944415:2944762:+	RP-L29, rpmC	large subunit ribosomal protein L29
>Lacticaseibacillus_paracasei_SMN-LBK_GM002691 locus=Chr1:2944794:2944910:+	RP-L16, MRPL16, rplP	large subunit ribosomal protein L16
>Lacticaseibacillus_paracasei_SMN-LBK_GM002717 locus=Chr1:2972455:2973390:-
>Lacticaseibacillus_paracasei_SMN-LBK_GM002807 locus=Chr1:3065202:3065681:-
>Lacticaseibacillus_paracasei_SMN-LBK_GM002808 locus=Chr1:3065855:3066742:-	ppx-gppA	exopolyphosphatase / guanosine-5'-triphosphate,3'-diphosphate pyrophosphatase
>Lacticaseibacillus_paracasei_SMN-LBK_GM002842 locus=Plas1:11132:11572:-
>Lacticaseibacillus_paracasei_SMN-LBK_GM002849 locus=Plas1:18505:18885:-	fruK	1-phosphofructokinase
>Lacticaseibacillus_paracasei_SMN-LBK_GM002850 locus=Plas1:19000:19569:-
>Lacticaseibacillus_paracasei_SMN-LBK_GM002851 locus=Plas1:19923:20609:-	glpK, GK	glycerol kinase
>Lacticaseibacillus_paracasei_SMN-LBK_GM002852 locus=Plas1:20643:21221:-
>Lacticaseibacillus_paracasei_SMN-LBK_GM002853 locus=Plas1:21211:22269:-
>Lacticaseibacillus_paracasei_SMN-LBK_GM002854 locus=Plas1:22815:23624:+
>Lacticaseibacillus_paracasei_SMN-LBK_GM002855 locus=Plas1:23626:24024:+	FUCA	alpha-L-fucosidase
>Lacticaseibacillus_paracasei_SMN-LBK_GM002856 locus=Plas1:24157:24390:-	PTS-Man-EIIA, manX	PTS system, mannose-specific IIA component
>Lacticaseibacillus_paracasei_SMN-LBK_GM002857 locus=Plas1:24383:24559:-	PTS-Man-EIIC, manY	PTS system, mannose-specific IIC component
>Lacticaseibacillus_paracasei_SMN-LBK_GM002858 locus=Plas1:24620:24766:-	PTS-Man-EIID, manZ	PTS system, mannose-specific IID component
>Lacticaseibacillus_paracasei_SMN-LBK_GM002859 locus=Plas1:25596:27410:+	PTS-Cel-EIIA, celC, chbA	PTS system, cellobiose-specific IIA component
>Lacticaseibacillus_paracasei_SMN-LBK_GM002870 locus=Plas1:40695:41921:-	PTS-Gat-EIIB, gatB, sgcB	PTS system, galactitol-specific IIB component
>Lacticaseibacillus_paracasei_SMN-LBK_GM002872 locus=Plas1:42854:43039:+	glpR	DeoR family transcriptional regulator, glycerol-3-phosphate regulon repressor
>Lacticaseibacillus_paracasei_SMN-LBK_GM002874 locus=Plas1:44152:44343:+
>Lacticaseibacillus_paracasei_SMN-LBK_GM002875 locus=Plas1:44336:45079:+	IMA, malL	oligo-1,6-glucosidase

## Sheet: Sheet2
Supplementary Table 2. Specific genes of L. paracasei SMN-LBK
Gene	Ko_name	Ko_defi
>Lacticaseibacillus_paracasei_SMN-LBK_GM000026 locus=Chr1:27023:27226:+	ABC.CD.P	putative ABC transport system permease protein
>Lacticaseibacillus_paracasei_SMN-LBK_GM000334 locus=Chr1:366861:367229:+	ykoE	energy-coupling factor transport system substrate-specific component
>Lacticaseibacillus_paracasei_SMN-LBK_GM000339 locus=Chr1:376451:377131:-	thiM	hydroxyethylthiazole kinase
>Lacticaseibacillus_paracasei_SMN-LBK_GM000392 locus=Chr1:429629:430522:-	penP	beta-lactamase class A
>Lacticaseibacillus_paracasei_SMN-LBK_GM000411 locus=Chr1:452768:453547:-	PTS-Ntr-EIIA, ptsN	PTS system, nitrogen regulatory IIA component
>Lacticaseibacillus_paracasei_SMN-LBK_GM000412 locus=Chr1:453756:454559:+	FBA, fbaA	fructose-bisphosphate aldolase, class II
>Lacticaseibacillus_paracasei_SMN-LBK_GM000413 locus=Chr1:454690:456546:+	PTS-Fru-EIIA, fruB	PTS system, fructose-specific IIA component
>Lacticaseibacillus_paracasei_SMN-LBK_GM000414 locus=Chr1:456628:457803:+	PTS-Fru-EIIB, fruA	PTS system, fructose-specific IIB component
>Lacticaseibacillus_paracasei_SMN-LBK_GM000415 locus=Chr1:458639:459283:+	PTS-Fru-EIIC, fruA	PTS system, fructose-specific IIC component
>Lacticaseibacillus_paracasei_SMN-LBK_GM000480 locus=Chr1:532058:535777:-	ABC.CD.P	putative ABC transport system permease protein
>Lacticaseibacillus_paracasei_SMN-LBK_GM000516 locus=Chr1:575052:576026:+	E1.2.3.3, poxL	pyruvate oxidase
>Lacticaseibacillus_paracasei_SMN-LBK_GM000527 locus=Chr1:582966:584867:+	licR	lichenan operon transcriptional antiterminator
>Lacticaseibacillus_paracasei_SMN-LBK_GM000533 locus=Chr1:591281:591742:+	ABC-2.A	ABC-2 type transport system ATP-binding protein
>Lacticaseibacillus_paracasei_SMN-LBK_GM000544 locus=Chr1:603183:603953:+	pepN	aminopeptidase N
>Lacticaseibacillus_paracasei_SMN-LBK_GM000550 locus=Chr1:607439:607681:-	aroE	shikimate dehydrogenase
>Lacticaseibacillus_paracasei_SMN-LBK_GM000552 locus=Chr1:609578:610837:-	aroE	shikimate dehydrogenase
>Lacticaseibacillus_paracasei_SMN-LBK_GM000554 locus=Chr1:612464:615631:-	cysK	cysteine synthase
>Lacticaseibacillus_paracasei_SMN-LBK_GM000577 locus=Chr1:636577:636705:+	dnaC	DNA replication protein DnaC
>Lacticaseibacillus_paracasei_SMN-LBK_GM000598 locus=Chr1:659233:659718:+	virD4, lvhD4	type IV secretion system protein VirD4
>Lacticaseibacillus_paracasei_SMN-LBK_GM000680 locus=Chr1:755369:755530:+	dinJ	DNA-damage-inducible protein J
>Lacticaseibacillus_paracasei_SMN-LBK_GM000766 locus=Chr1:848242:848436:-	amt, AMT, MEP	ammonium transporter, Amt family
>Lacticaseibacillus_paracasei_SMN-LBK_GM000873 locus=Chr1:974257:974637:+	pip	proline iminopeptidase
>Lacticaseibacillus_paracasei_SMN-LBK_GM000936 locus=Chr1:1042379:1042480:+	birA	BirA family transcriptional regulator, biotin operon repressor / biotin---[acetyl-CoA-carboxylase] ligase
>Lacticaseibacillus_paracasei_SMN-LBK_GM000991 locus=Chr1:1102393:1102512:-	tagE	poly(glycerol-phosphate) alpha-glucosyltransferase
>Lacticaseibacillus_paracasei_SMN-LBK_GM001014 locus=Chr1:1121909:1122187:+	trmL, cspR	tRNA (cytidine/uridine-2'-O-)-methyltransferase
>Lacticaseibacillus_paracasei_SMN-LBK_GM001020 locus=Chr1:1125810:1126232:+	fabG	3-oxoacyl-[acyl-carrier protein] reductase
>Lacticaseibacillus_paracasei_SMN-LBK_GM001112 locus=Chr1:1225367:1225738:-	potD	spermidine/putrescine transport system substrate-binding protein
>Lacticaseibacillus_paracasei_SMN-LBK_GM001117 locus=Chr1:1229833:1230264:-	ABC-2.P	ABC-2 type transport system permease protein
>Lacticaseibacillus_paracasei_SMN-LBK_GM001118 locus=Chr1:1230400:1230642:+	ABC-2.A	ABC-2 type transport system ATP-binding protein
>Lacticaseibacillus_paracasei_SMN-LBK_GM001120 locus=Chr1:1231324:1231482:-	dacA	diadenylate cyclase
>Lacticaseibacillus_paracasei_SMN-LBK_GM001122 locus=Chr1:1233299:1233502:+	glmM	phosphoglucosamine mutase
>Lacticaseibacillus_paracasei_SMN-LBK_GM001123 locus=Chr1:1233502:1233849:+	glmS, GFPT	glucosamine---fructose-6-phosphate aminotransferase (isomerizing)
>Lacticaseibacillus_paracasei_SMN-LBK_GM001142 locus=Chr1:1243701:1244918:+	E3.2.1.22B, galA, rafA	alpha-galactosidase
>Lacticaseibacillus_paracasei_SMN-LBK_GM001358 locus=Chr1:1459892:1460059:-	ATPF0C, atpE	F-type H+-transporting ATPase subunit c
>Lacticaseibacillus_paracasei_SMN-LBK_GM001359 locus=Chr1:1460128:1460346:-	ATPF0B, atpF	F-type H+-transporting ATPase subunit b
>Lacticaseibacillus_paracasei_SMN-LBK_GM001360 locus=Chr1:1460545:1460811:-	ATPF1D, atpH	F-type H+-transporting ATPase subunit delta
>Lacticaseibacillus_paracasei_SMN-LBK_GM001361 locus=Chr1:1461082:1461816:-	ATPF1A, atpA	F-type H+-transporting ATPase subunit alpha
>Lacticaseibacillus_paracasei_SMN-LBK_GM001362 locus=Chr1:1461813:1462205:-	ATPF1G, atpG	F-type H+-transporting ATPase subunit gamma
>Lacticaseibacillus_paracasei_SMN-LBK_GM001363 locus=Chr1:1462250:1462633:-	ATPF1B, atpD	F-type H+-transporting ATPase subunit beta
>Lacticaseibacillus_paracasei_SMN-LBK_GM001421 locus=Chr1:1526169:1527884:+	desK	two-component system, NarL family, sensor histidine kinase DesK
>Lacticaseibacillus_paracasei_SMN-LBK_GM001422 locus=Chr1:1527817:1529697:+	ABC-2.P	ABC-2 type transport system permease protein
>Lacticaseibacillus_paracasei_SMN-LBK_GM001423 locus=Chr1:1529666:1531831:+	ABC-2.A	ABC-2 type transport system ATP-binding protein
>Lacticaseibacillus_paracasei_SMN-LBK_GM001566 locus=Chr1:1687909:1689555:-	scpB	segregation and condensation protein B
>Lacticaseibacillus_paracasei_SMN-LBK_GM001567 locus=Chr1:1689997:1690995:+	rluB	23S rRNA pseudouridine2605 synthase
>Lacticaseibacillus_paracasei_SMN-LBK_GM001569 locus=Chr1:1692775:1694277:-	fer	ferredoxin
>Lacticaseibacillus_paracasei_SMN-LBK_GM001571 locus=Chr1:1695885:1697444:-	recQ	ATP-dependent DNA helicase RecQ
>Lacticaseibacillus_paracasei_SMN-LBK_GM001573 locus=Chr1:1698000:1700597:-	cmk	CMP/dCMP kinase
>Lacticaseibacillus_paracasei_SMN-LBK_GM001574 locus=Chr1:1700979:1702334:-	RP-S1, rpsA	small subunit ribosomal protein S1
>Lacticaseibacillus_paracasei_SMN-LBK_GM001575 locus=Chr1:1702309:1710702:-	engA, der	GTPase
>Lacticaseibacillus_paracasei_SMN-LBK_GM001576 locus=Chr1:1711688:1712701:-	hupB	DNA-binding protein HU-beta
>Lacticaseibacillus_paracasei_SMN-LBK_GM001913 locus=Chr1:2072267:2072506:+	PGAM, gpmA	2,3-bisphosphoglycerate-dependent phosphoglycerate mutase
>Lacticaseibacillus_paracasei_SMN-LBK_GM001914 locus=Chr1:2072512:2073042:+	TARS, thrS	threonyl-tRNA synthetase
>Lacticaseibacillus_paracasei_SMN-LBK_GM001919 locus=Chr1:2078936:2079649:-	nrdR	transcriptional repressor NrdR
>Lacticaseibacillus_paracasei_SMN-LBK_GM001920 locus=Chr1:2079683:2080534:-	coaE	dephospho-CoA kinase
>Lacticaseibacillus_paracasei_SMN-LBK_GM001921 locus=Chr1:2080849:2082075:-	mutM, fpg	formamidopyrimidine-DNA glycosylase
>Lacticaseibacillus_paracasei_SMN-LBK_GM001922 locus=Chr1:2082181:2082513:-	polA	DNA polymerase I
>Lacticaseibacillus_paracasei_SMN-LBK_GM001923 locus=Chr1:2082850:2083077:-	K06890	uncharacterized protein
>Lacticaseibacillus_paracasei_SMN-LBK_GM001925 locus=Chr1:2084048:2084287:-	ftsK, spoIIIE	DNA segregation ATPase FtsK/SpoIIIE, S-DNA-T family
>Lacticaseibacillus_paracasei_SMN-LBK_GM001926 locus=Chr1:2084899:2085531:-	K06878	tRNA-binding protein
>Lacticaseibacillus_paracasei_SMN-LBK_GM001990 locus=Chr1:2169339:2170751:+	yydK	GntR family transcriptional regulator, transcriptional regulator of bglA
>Lacticaseibacillus_paracasei_SMN-LBK_GM002000 locus=Chr1:2185923:2186753:-	E2.3.1.9, atoB	acetyl-CoA C-acetyltransferase
>Lacticaseibacillus_paracasei_SMN-LBK_GM002003 locus=Chr1:2191505:2192248:-	mrr	restriction system protein
>Lacticaseibacillus_paracasei_SMN-LBK_GM002024 locus=Chr1:2215344:2216252:-	proC	pyrroline-5-carboxylate reductase
>Lacticaseibacillus_paracasei_SMN-LBK_GM002027 locus=Chr1:2218078:2218467:+	TC.POT	proton-dependent oligopeptide transporter, POT family
>Lacticaseibacillus_paracasei_SMN-LBK_GM002028 locus=Chr1:2218471:2218644:+	ABC.CD.A	putative ABC transport system ATP-binding protein
>Lacticaseibacillus_paracasei_SMN-LBK_GM002153 locus=Chr1:2366590:2367804:-	uvrD, pcrA	DNA helicase II / ATP-dependent DNA helicase PcrA
>Lacticaseibacillus_paracasei_SMN-LBK_GM002155 locus=Chr1:2369739:2372417:-	TC.KEF	monovalent cation:H+ antiporter-2, CPA2 family
>Lacticaseibacillus_paracasei_SMN-LBK_GM002156 locus=Chr1:2372645:2373430:-	pip	proline iminopeptidase
>Lacticaseibacillus_paracasei_SMN-LBK_GM002199 locus=Chr1:2415845:2416042:-	cwlO	peptidoglycan DL-endopeptidase CwlO
>Lacticaseibacillus_paracasei_SMN-LBK_GM002323 locus=Chr1:2552096:2552422:+	abcA, bmrA	ATP-binding cassette, subfamily B, bacterial AbcA/BmrA
>Lacticaseibacillus_paracasei_SMN-LBK_GM002363 locus=Chr1:2592099:2593220:-	ABC-2.A	ABC-2 type transport system ATP-binding protein
>Lacticaseibacillus_paracasei_SMN-LBK_GM002435 locus=Chr1:2649471:2651585:-	maf	septum formation protein
>Lacticaseibacillus_paracasei_SMN-LBK_GM002436 locus=Chr1:2651630:2652721:-	mutL	DNA mismatch repair protein MutL
>Lacticaseibacillus_paracasei_SMN-LBK_GM002437 locus=Chr1:2652718:2657643:-	mutS	DNA mismatch repair protein MutS
>Lacticaseibacillus_paracasei_SMN-LBK_GM002450 locus=Chr1:2684041:2685333:-	ABCF3	ATP-binding cassette, subfamily F, member 3
>Lacticaseibacillus_paracasei_SMN-LBK_GM002463 locus=Chr1:2702109:2702219:+	tmk, DTYMK	dTMP kinase
>Lacticaseibacillus_paracasei_SMN-LBK_GM002616 locus=Chr1:2870628:2871047:-	mntA	manganese/zinc transport system ATP-binding protein
>Lacticaseibacillus_paracasei_SMN-LBK_GM002619 locus=Chr1:2873367:2873693:-	ABC.ZM.S	zinc/manganese transport system substrate-binding protein
>Lacticaseibacillus_paracasei_SMN-LBK_GM002673 locus=Chr1:2926696:2927010:-	RP-L17, MRPL17, rplQ	large subunit ribosomal protein L17
>Lacticaseibacillus_paracasei_SMN-LBK_GM002674 locus=Chr1:2927036:2927506:-	rpoA	DNA-directed RNA polymerase subunit alpha
>Lacticaseibacillus_paracasei_SMN-LBK_GM002676 locus=Chr1:2930537:2931292:-	RP-S13, rpsM	small subunit ribosomal protein S13
>Lacticaseibacillus_paracasei_SMN-LBK_GM002677 locus=Chr1:2931528:2931785:+	infA	translation initiation factor IF-1
>Lacticaseibacillus_paracasei_SMN-LBK_GM002688 locus=Chr1:2943078:2943557:+	RP-L14, MRPL14, rplN	large subunit ribosomal protein L14
>Lacticaseibacillus_paracasei_SMN-LBK_GM002690 locus=Chr1:2944415:2944762:+	RP-L29, rpmC	large subunit ribosomal protein L29
>Lacticaseibacillus_paracasei_SMN-LBK_GM002691 locus=Chr1:2944794:2944910:+	RP-L16, MRPL16, rplP	large subunit ribosomal protein L16
>Lacticaseibacillus_paracasei_SMN-LBK_GM002808 locus=Chr1:3065855:3066742:-	ppx-gppA	exopolyphosphatase / guanosine-5'-triphosphate,3'-diphosphate pyrophosphatase
>Lacticaseibacillus_paracasei_SMN-LBK_GM002849 locus=Plas1:18505:18885:-	fruK	1-phosphofructokinase
>Lacticaseibacillus_paracasei_SMN-LBK_GM002851 locus=Plas1:19923:20609:-	glpK, GK	glycerol kinase
>Lacticaseibacillus_paracasei_SMN-LBK_GM002855 locus=Plas1:23626:24024:+	FUCA	alpha-L-fucosidase
>Lacticaseibacillus_paracasei_SMN-LBK_GM002856 locus=Plas1:24157:24390:-	PTS-Man-EIIA, manX	PTS system, mannose-specific IIA component
>Lacticaseibacillus_paracasei_SMN-LBK_GM002857 locus=Plas1:24383:24559:-	PTS-Man-EIIC, manY	PTS system, mannose-specific IIC component
>Lacticaseibacillus_paracasei_SMN-LBK_GM002858 locus=Plas1:24620:24766:-	PTS-Man-EIID, manZ	PTS system, mannose-specific IID component
>Lacticaseibacillus_paracasei_SMN-LBK_GM002859 locus=Plas1:25596:27410:+	PTS-Cel-EIIA, celC, chbA	PTS system, cellobiose-specific IIA component
>Lacticaseibacillus_paracasei_SMN-LBK_GM002870 locus=Plas1:40695:41921:-	PTS-Gat-EIIB, gatB, sgcB	PTS system, galactitol-specific IIB component
>Lacticaseibacillus_paracasei_SMN-LBK_GM002872 locus=Plas1:42854:43039:+	glpR	DeoR family transcriptional regulator, glycerol-3-phosphate regulon repressor
>Lacticaseibacillus_paracasei_SMN-LBK_GM002875 locus=Plas1:44336:45079:+	IMA, malL	oligo-1,6-glucosidase
