# Supplementary material for: Comparative genomic analysis of Lacticaseibacillus paracasei SMN-LBK from koumiss
Source: Front Microbiol. 2022 Oct 18;13:1042117. doi: 10.3389/fmicb.2022.1042117 (PMC9622802; doi:10.3389/fmicb.2022.1042117)
Supplement: Supplementary file 8 [file Table_3.XLSX]

## Sheet: CRISPR.stat
Supplementary Table 3. CRISPR and cas prediction results for L. paracasei SMN-LBK
CRISPR ID	SeqID	Start	End	Strand	Length	aSPLength	SPnum	aDRLength
CRISPR001	Chr1	674911	676831	+	1921	32	31	28
CRISPR002	Chr1	968866	969152	-	287	82	2	41
CRISPR003	Chr1	1418571	1418983	-	413	83	3	41
CRISPR004	Chr1	1547158	1547437	-	280	78	2	41
CRISPR005	Chr1	1808918	1809208	+	291	85	2	40
CRISPR006	Chr1	2320626	2320916	+	291	84	2	41

## Sheet: Cas.stat
Supplementary Table 3. CRISPR and cas prediction results for L. paracasei SMN-LBK
Gene_id	Identity	E_value	Kegg_geneID	Ko_id	Ko_name	Ko_defi
GM000686	99.8	0	lca:LSEI_0349	K07012	cas3	CRISPR-associated endonuclease/helicase Cas3
GM000687	99.8	0	lca:LSEI_0350	K19123	casA, cse1	CRISPR system Cascade subunit CasA
GM000688	99.5	2e-108	lca:LSEI_0351	K19046	casB, cse2	CRISPR system Cascade subunit CasB
GM000689	99.7	2.4e-200	lca:LSEI_0352	K19124	casC, cse4	CRISPR system Cascade subunit CasC
GM000690	99.6	1.1e-129	lca:LSEI_0353	K19125	casD, cse5	CRISPR system Cascade subunit CasD
GM000691	99.1	1.5e-117	lca:LSEI_0354	K19126	casE, cse3	CRISPR system Cascade subunit CasE
GM000692	99.4	7e-172	lca:LSEI_0355	K15342	cas1	CRISP-associated protein Cas1
GM000693	99.3	7.9e-165	lca:LSEI_0356	K09951	cas2	CRISPR-associated protein Cas2
