# Supplementary material for: Comparative genomic analysis of Lacticaseibacillus paracasei SMN-LBK from koumiss
Source: Front Microbiol. 2022 Oct 18;13:1042117. doi: 10.3389/fmicb.2022.1042117 (PMC9622802; doi:10.3389/fmicb.2022.1042117)
Supplement: Supplementary file 10 [file Table_5.XLSX]

## Sheet: SMN-LBK
Supplementary Table 5. The KEGG database annotation results of SMN-LBK
Gene_id	Identity	E_value	Kegg_geneID	Ko_id	Ko_name	Ko_defi	Ko_EC	Ko_class
GM000001	100	4.2e-255	lpq:AF91_14240	K02313	dnaA	chromosomal replication initiator protein	--	Environmental Information Processing; Signal transduction; Two-component system [PATH:ko02020] Cellular Processes; Cell growth and death; Cell cycle - Caulobacter [PATH:ko04112]
GM000002	100	4e-206	lca:LSEI_0002	K02338	dnaN	DNA polymerase III subunit beta	2.7.7.7	Metabolism; Nucleotide metabolism; Purine metabolism [PATH:ko00230] Metabolism; Nucleotide metabolism; Pyrimidine metabolism [PATH:ko00240] Metabolism; Global and overview maps; Metabolic pathways [PATH:ko01100] Genetic Information Processing; Replication and repair; DNA replication [PATH:ko03030] Genetic Information Processing; Replication and repair; Mismatch repair [PATH:ko03430] Genetic Infor…
GM000003	100	1.6e-31	lcz:LCAZH_0004
GM000004	99.7	8.2e-204	lce:LC2W_0005	K03629	recF	DNA replication and repair protein RecF	--	Genetic Information Processing; Replication and repair; Homologous recombination [PATH:ko03440]
GM000005	100	1.8e-21	lcl:LOCK919_0006
GM000006	99.8	0	lcz:LCAZH_0007	K02470	gyrB	DNA gyrase subunit B	5.99.1.3
GM000007	100	0	lpi:LBPG_01543	K02469	gyrA	DNA gyrase subunit A	5.99.1.3
GM000008	99.6	1.6e-134	lcw:BN194_00080	K01619	deoC, DERA	deoxyribose-phosphate aldolase	4.1.2.4	Metabolism; Carbohydrate metabolism; Pentose phosphate pathway [PATH:ko00030]
GM000009	97.4	1.1e-13	lcz:LCAZH_2919
GM000010	100	4.7e-75	lce:LC2W_0010	K03111	ssb	single-strand DNA-binding protein	--	Genetic Information Processing; Replication and repair; DNA replication [PATH:ko03030] Genetic Information Processing; Replication and repair; Mismatch repair [PATH:ko03430] Genetic Information Processing; Replication and repair; Homologous recombination [PATH:ko03440]
GM000011	100	4e-49	lce:LC2W_0011	K02990	RP-S6, MRPS6, rpsF	small subunit ribosomal protein S6	--	Genetic Information Processing; Translation; Ribosome [PATH:ko03010]
GM000012	99.5	1.1e-109	lcz:LCAZH_0013	K03111	ssb	single-strand DNA-binding protein	--	Genetic Information Processing; Replication and repair; DNA replication [PATH:ko03030] Genetic Information Processing; Replication and repair; Mismatch repair [PATH:ko03430] Genetic Information Processing; Replication and repair; Homologous recombination [PATH:ko03440]
GM000013	100	8.9e-36	lce:LC2W_0013	K02963	RP-S18, MRPS18, rpsR	small subunit ribosomal protein S18	--	Genetic Information Processing; Translation; Ribosome [PATH:ko03010]
GM000014	99.8	1e-286	lcb:LCABL_00140	K00425	cydA	cytochrome bd ubiquinol oxidase subunit I	1.10.3.14	Metabolism; Energy metabolism; Oxidative phosphorylation [PATH:ko00190] Metabolism; Global and overview maps; Metabolic pathways [PATH:ko01100] Environmental Information Processing; Signal transduction; Two-component system [PATH:ko02020]
GM000015	100	5.9e-193	lpi:LBPG_01551	K00426	cydB	cytochrome bd ubiquinol oxidase subunit II	1.10.3.14	Metabolism; Energy metabolism; Oxidative phosphorylation [PATH:ko00190] Metabolism; Global and overview maps; Metabolic pathways [PATH:ko01100] Environmental Information Processing; Signal transduction; Two-component system [PATH:ko02020]
GM000016	100	4.5e-37	lce:LC2W_0018
GM000018	99	9e-109	lca:LSEI_0017
GM000019	98.5	2.5e-67	lce:LC2W_0020
GM000020	99	3.7e-48	lpi:LBPG_01556
GM000021	99.6	6.8e-158	lcx:LCA12A_0634	K07052	K07052	uncharacterized protein	--
GM000022	100	5e-25	lcw:BN194_00220
GM000023	100	8.9e-28	lpi:LBPG_01559
GM000024	100	2.4e-225	lpap:LBPC_0020	K21471	cwlO	peptidoglycan DL-endopeptidase CwlO	3.4.-.-
GM000026	99.8	0	lcz:LCAZH_0025	K02004	ABC.CD.P	putative ABC transport system permease protein	--
GM000027	99.6	2.3e-127	lce:LC2W_0027	K02003	ABC.CD.A	putative ABC transport system ATP-binding protein	--
GM000028	100	1.2e-99	lcl:LOCK919_0028
GM000029	100	1.8e-152	lce:LC2W_0029
GM000030	94.3	2.9e-47	lpq:AF91_14370
GM000031	99.2	1.8e-65	lcx:LCA12A_2812
GM000032	100	2.2e-81	lcx:LCA12A_2813
GM000033	99.9	0	lcz:LCAZH_0032
GM000034	99.6	2.5e-135	lpi:LBPG_01569	K07090	K07090	uncharacterized protein	--
GM000035	99	4.7e-105	lpq:AF91_14380
GM000036	99	3.5e-165	lcb:LCABL_00330
GM000037	99.5	5e-113	lpi:LBPG_01575
GM000038	100	9.9e-252	lpq:AF91_14395	K03322	mntH	manganese transport protein	--
GM000039	98.2	1.6e-57	lcz:LCAZH_0040
GM000040	99.2	2.3e-58	lcs:LCBD_0038
GM000041	99.6	1.3e-286	lca:LSEI_0033	K08659	pepDA, pepDB	dipeptidase	3.4.-.-
GM000042	100	1.3e-121	lce:LC2W_0042
GM000043	100	1.3e-50	lcs:LCBD_0041
GM000044	98.4	2.4e-24	lce:LC2W_0044
GM000045	100	5.4e-109	lce:LC2W_0045
GM000046	100	1.5e-125	lrh:LGG_00464
GM000047	99.3	7.4e-262	lca:LSEI_0041
GM000048	100	5.1e-127	lcl:LOCK919_0050
GM000049	100	7.8e-54	lcz:LCAZH_0053
GM000050	100	4.8e-47	lcb:LCABL_00490
GM000051	91.9	1.2e-30	lcs:LCBD_0049
GM000052	97.2	7.8e-11	lca:LSEI_0048
GM000053	99.6	4.7e-156	lcx:LCA12A_0990	K07052	K07052	uncharacterized protein	--
GM000054	100	1.5e-125	lpap:LBPC_0339
GM000055	100	5.8e-117	lpi:LBPG_01594	K01625	eda	2-dehydro-3-deoxyphosphogluconate aldolase / (4S)-4-hydroxy-2-oxoglutarate aldolase	4.1.2.14 4.1.3.42	Metabolism; Carbohydrate metabolism; Pentose phosphate pathway [PATH:ko00030] Metabolism; Carbohydrate metabolism; Glyoxylate and dicarboxylate metabolism [PATH:ko00630] Metabolism; Global and overview maps; Metabolic pathways [PATH:ko01100] Metabolism; Global and overview maps; Microbial metabolism in diverse environments [PATH:ko01120] Metabolism; Global and overview maps; Carbon metabolism [PA…
GM000056	99.2	3.2e-132	lcw:BN194_00560
GM000057	100	1.7e-30	lcw:BN194_00570
GM000058	100	1.1e-55	lpap:LBPC_0039
GM000059	96.7	6e-165	lcw:BN194_00590
GM000060	98.8	9.2e-39	lpar:FAM21731_02655
GM000061	99.6	1e-158	lbn:LBUCD034_p0039
GM000062	99.1	4.6e-293	lca:LSEI_0057	K06147	ABCB-BAC	ATP-binding cassette, subfamily B, bacterial	--
GM000063	98.7	4.9e-251	lpi:LBPG_01601
GM000064	93.5	1.7e-48	lcs:LCBD_0060
GM000065	82.5	0	lro:LOCK900_0062	K06994	K06994	putative drug exporter of the RND superfamily	--
GM000066	100	1.4e-109	lcz:LCAZH_0070
GM000067	100	2.7e-41	lcz:LCAZH_0071
GM000068	100	3.8e-116	lcx:LCA12A_1000	K05846	opuBD	osmoprotectant transport system permease protein	--	Environmental Information Processing; Membrane transport; ABC transporters [PATH:ko02010]
GM000069	100	1.3e-167	lcx:LCA12A_1001	K05845	opuC	osmoprotectant transport system substrate-binding protein	--	Environmental Information Processing; Membrane transport; ABC transporters [PATH:ko02010]
GM000070	100	1.9e-109	lcb:LCABL_00650	K05846	opuBD	osmoprotectant transport system permease protein	--	Environmental Information Processing; Membrane transport; ABC transporters [PATH:ko02010]
GM000071	99.8	6.5e-234	lcs:LCBD_0067	K05847	opuA	osmoprotectant transport system ATP-binding protein	--	Environmental Information Processing; Membrane transport; ABC transporters [PATH:ko02010]
GM000072	99.5	8.2e-119	lcw:BN194_00690	K07052	K07052	uncharacterized protein	--
GM000073	100	5.4e-35	lca:LSEI_0068
GM000074	100	9.2e-28	lca:LSEI_0069
GM000075	99	0	lpi:LBPG_01614	K01534	zntA	Cd2+/Zn2+-exporting ATPase	3.6.3.3 3.6.3.5
GM000076	100	1.2e-33	lcz:LCAZH_0080
GM000077	100	8.6e-101	lca:LSEI_0072
GM000078	100	3.3e-118	lcw:BN194_00750	K21562	flp	CRP/FNR family transcriptional regulator, anaerobic regulatory protein	--
GM000079	90.7	1.5e-13	lcw:BN194_00760
GM000080	76	1.5e-12	lce:LC2W_2605
GM000081	99.2	1.4e-141	lcb:LCABL_00720	K01695	trpA	tryptophan synthase alpha chain	4.2.1.20	Metabolism; Amino acid metabolism; Glycine, serine and threonine metabolism [PATH:ko00260] Metabolism; Amino acid metabolism; Phenylalanine, tyrosine and tryptophan biosynthesis [PATH:ko00400] Metabolism; Global and overview maps; Metabolic pathways [PATH:ko01100] Metabolism; Global and overview maps; Biosynthesis of secondary metabolites [PATH:ko01110] Metabolism; Global and overview maps; Biosy…
GM000082	98.3	1.3e-226	lcx:LCA12A_1020	K01696	trpB	tryptophan synthase beta chain	4.2.1.20	Metabolism; Amino acid metabolism; Glycine, serine and threonine metabolism [PATH:ko00260] Metabolism; Amino acid metabolism; Phenylalanine, tyrosine and tryptophan biosynthesis [PATH:ko00400] Metabolism; Global and overview maps; Metabolic pathways [PATH:ko01100] Metabolism; Global and overview maps; Biosynthesis of secondary metabolites [PATH:ko01110] Metabolism; Global and overview maps; Biosy…
GM000083	99.5	4.8e-99	lcl:LOCK919_0082	K01817	trpF	phosphoribosylanthranilate isomerase	5.3.1.24	Metabolism; Amino acid metabolism; Phenylalanine, tyrosine and tryptophan biosynthesis [PATH:ko00400] Metabolism; Global and overview maps; Metabolic pathways [PATH:ko01100] Metabolism; Global and overview maps; Biosynthesis of secondary metabolites [PATH:ko01110] Metabolism; Global and overview maps; Biosynthesis of antibiotics [PATH:ko01130] Metabolism; Global and overview maps; Biosynthesis of…
GM000084	99.6	2.9e-139	lca:LSEI_0077	K01609	trpC	indole-3-glycerol phosphate synthase	4.1.1.48	Metabolism; Amino acid metabolism; Phenylalanine, tyrosine and tryptophan biosynthesis [PATH:ko00400] Metabolism; Global and overview maps; Metabolic pathways [PATH:ko01100] Metabolism; Global and overview maps; Biosynthesis of secondary metabolites [PATH:ko01110] Metabolism; Global and overview maps; Biosynthesis of antibiotics [PATH:ko01130] Metabolism; Global and overview maps; Biosynthesis of…
GM000085	100	2.2e-187	lcz:LCAZH_0088	K00766	trpD	anthranilate phosphoribosyltransferase	2.4.2.18	Metabolism; Amino acid metabolism; Phenylalanine, tyrosine and tryptophan biosynthesis [PATH:ko00400] Metabolism; Global and overview maps; Metabolic pathways [PATH:ko01100] Metabolism; Global and overview maps; Biosynthesis of secondary metabolites [PATH:ko01110] Metabolism; Global and overview maps; Biosynthesis of antibiotics [PATH:ko01130] Metabolism; Global and overview maps; Biosynthesis of…
GM000087	100	3.7e-212	lca:LSEI_0079
GM000088	99.3	0	lpi:LBPG_01633
GM000089	99.5	4.1e-106	lpap:LBPC_0068
GM000090	100	2.8e-63	lpq:AF91_14610
GM000091	98.8	2.3e-130	lce:LC2W_0076
GM000092	98.2	3.9e-84	lca:LSEI_0084
GM000093	98.4	2.1e-27	lca:LSEI_0085
GM000094	98.2	4.1e-86	lca:LSEI_0086
GM000095	100	1.5e-140	lcx:LCA12A_1031	K00215	dapB	4-hydroxy-tetrahydrodipicolinate reductase	1.17.1.8	Metabolism; Biosynthesis of other secondary metabolites; Monobactam biosynthesis [PATH:ko00261] Metabolism; Amino acid metabolism; Lysine biosynthesis [PATH:ko00300] Metabolism; Global and overview maps; Metabolic pathways [PATH:ko01100] Metabolism; Global and overview maps; Biosynthesis of secondary metabolites [PATH:ko01110] Metabolism; Global and overview maps; Microbial metabolism in diverse …
GM000096	100	2.9e-167	lca:LSEI_0095	K01714	dapA	4-hydroxy-tetrahydrodipicolinate synthase	4.3.3.7	Metabolism; Biosynthesis of other secondary metabolites; Monobactam biosynthesis [PATH:ko00261] Metabolism; Amino acid metabolism; Lysine biosynthesis [PATH:ko00300] Metabolism; Global and overview maps; Metabolic pathways [PATH:ko01100] Metabolism; Global and overview maps; Biosynthesis of secondary metabolites [PATH:ko01110] Metabolism; Global and overview maps; Microbial metabolism in diverse …
GM000097	99.5	4.2e-219	lce:LC2W_0087	K05823	dapL	N-acetyldiaminopimelate deacetylase	3.5.1.47	Metabolism; Amino acid metabolism; Lysine biosynthesis [PATH:ko00300] Metabolism; Global and overview maps; Metabolic pathways [PATH:ko01100] Metabolism; Global and overview maps; Biosynthesis of secondary metabolites [PATH:ko01110] Metabolism; Global and overview maps; Biosynthesis of amino acids [PATH:ko01230]
GM000098	94.4	7.9e-120	lrh:LGG_00111	K05822	dapH, dapD	tetrahydrodipicolinate N-acetyltransferase	2.3.1.89	Metabolism; Amino acid metabolism; Lysine biosynthesis [PATH:ko00300] Metabolism; Global and overview maps; Metabolic pathways [PATH:ko01100] Metabolism; Global and overview maps; Biosynthesis of secondary metabolites [PATH:ko01110] Metabolism; Global and overview maps; Biosynthesis of amino acids [PATH:ko01230]
GM000099	99.6	2.6e-257	lcz:LCAZH_0108	K01586	lysA	diaminopimelate decarboxylase	4.1.1.20	Metabolism; Amino acid metabolism; Lysine biosynthesis [PATH:ko00300] Metabolism; Global and overview maps; Metabolic pathways [PATH:ko01100] Metabolism; Global and overview maps; Biosynthesis of secondary metabolites [PATH:ko01110] Metabolism; Global and overview maps; Microbial metabolism in diverse environments [PATH:ko01120] Metabolism; Global and overview maps; Biosynthesis of antibiotics [P…
GM000100	99.8	5.8e-260	lcx:LCA12A_1036	K00928	lysC	aspartate kinase	2.7.2.4	Metabolism; Amino acid metabolism; Glycine, serine and threonine metabolism [PATH:ko00260] Metabolism; Biosynthesis of other secondary metabolites; Monobactam biosynthesis [PATH:ko00261] Metabolism; Amino acid metabolism; Cysteine and methionine metabolism [PATH:ko00270] Metabolism; Amino acid metabolism; Lysine biosynthesis [PATH:ko00300] Metabolism; Global and overview maps; Metabolic pathways …
GM000101	99.7	2e-188	lca:LSEI_0100	K01778	dapF	diaminopimelate epimerase	5.1.1.7	Metabolism; Amino acid metabolism; Lysine biosynthesis [PATH:ko00300] Metabolism; Global and overview maps; Metabolic pathways [PATH:ko01100] Metabolism; Global and overview maps; Biosynthesis of secondary metabolites [PATH:ko01110] Metabolism; Global and overview maps; Microbial metabolism in diverse environments [PATH:ko01120] Metabolism; Global and overview maps; Biosynthesis of antibiotics [P…
GM000102	99.1	5.4e-197	lca:LSEI_0101	K00133	asd	aspartate-semialdehyde dehydrogenase	1.2.1.11	Metabolism; Amino acid metabolism; Glycine, serine and threonine metabolism [PATH:ko00260] Metabolism; Biosynthesis of other secondary metabolites; Monobactam biosynthesis [PATH:ko00261] Metabolism; Amino acid metabolism; Cysteine and methionine metabolism [PATH:ko00270] Metabolism; Amino acid metabolism; Lysine biosynthesis [PATH:ko00300] Metabolism; Global and overview maps; Metabolic pathways …
GM000103	91.3	1.1e-14	lce:LC2W_0093
GM000104	100	5.6e-64	lpi:LBPG_01649
GM000105	99.3	4.2e-73	lcs:LCBD_0105
GM000106	99.7	2.4e-155	lca:LSEI_0105
GM000108	100	1.5e-125	lrh:LGG_00464
GM000110	100	7.5e-96	lca:LSEI_0107
GM000111	100	8.4e-47	lca:LSEI_0108
GM000112	99.5	1.7e-116	lca:LSEI_0110
GM000113	99.3	2e-149	lca:LSEI_0111	K01992	ABC-2.P	ABC-2 type transport system permease protein	--
GM000114	78.5	1.6e-102	lra:LRHK_123	K01992	ABC-2.P	ABC-2 type transport system permease protein	--
GM000115	99.4	5e-170	lca:LSEI_0114	K01990	ABC-2.A	ABC-2 type transport system ATP-binding protein	--
GM000116	100	0	lpq:AF91_14765
GM000117	100	7e-77	lce:LC2W_0100	K02939	RP-L9, MRPL9, rplI	large subunit ribosomal protein L9	--	Genetic Information Processing; Translation; Ribosome [PATH:ko03010]
GM000118	99.8	1.5e-260	lcx:LCA12A_1046	K02314	dnaB	replicative DNA helicase	3.6.4.12	Genetic Information Processing; Replication and repair; DNA replication [PATH:ko03030] Cellular Processes; Cell growth and death; Cell cycle - Caulobacter [PATH:ko04112]
GM000119	100	5.5e-219	lpap:LBPC_0096
GM000120	99.5	0	lca:LSEI_0119	K02808	PTS-Scr-EIIA, scrA, ptsS	PTS system, sucrose-specific IIA component	2.7.1.211	Metabolism; Carbohydrate metabolism; Starch and sucrose metabolism [PATH:ko00500] Environmental Information Processing; Membrane transport; Phosphotransferase system (PTS) [PATH:ko02060]
GM000121	100	1.5e-166	lca:LSEI_0120	K07106	murQ	N-acetylmuramic acid 6-phosphate etherase	4.2.1.126	Metabolism; Carbohydrate metabolism; Amino sugar and nucleotide sugar metabolism [PATH:ko00520] Metabolism; Global and overview maps; Metabolic pathways [PATH:ko01100]
GM000122	97.6	2.3e-153	lcx:LCA12A_1050
GM000123	99.5	9.5e-106	lpq:AF91_14800
GM000124	99.6	3.2e-129	lcx:LCA12A_1052	K02003	ABC.CD.A	putative ABC transport system ATP-binding protein	--
GM000125	99.5	0	lcl:LOCK919_0123	K02004	ABC.CD.P	putative ABC transport system permease protein	--
GM000126	100	2.7e-204	lpi:LBPG_01666	K22213	PATG	6-methylsalicylate decarboxylase	4.1.1.52
GM000127	100	2.5e-249	lcx:LCA12A_1055	K01939	purA, ADSS	adenylosuccinate synthase	6.3.4.4	Metabolism; Nucleotide metabolism; Purine metabolism [PATH:ko00230] Metabolism; Amino acid metabolism; Alanine, aspartate and glutamate metabolism [PATH:ko00250] Metabolism; Global and overview maps; Metabolic pathways [PATH:ko01100]
GM000128	100	0	lcx:LCA12A_1056	K01534	zntA	Cd2+/Zn2+-exporting ATPase	3.6.3.3 3.6.3.5
GM000129	99.2	7.4e-64	lpi:LBPG_01669
GM000130	99.6	0	lcl:LOCK919_0128	K01535	PMA1, PMA2	H+-transporting ATPase	7.1.2.1	Metabolism; Energy metabolism; Oxidative phosphorylation [PATH:ko00190]
GM000131	98	2.4e-161	lce:LC2W_0108
GM000132	98.7	9.1e-203	lpap:LBPC_0110
GM000133	98.6	2.6e-34	lcb:LCABL_01190
GM000134	99.4	4.2e-169	lcz:LCAZH_0140	K01990	ABC-2.A	ABC-2 type transport system ATP-binding protein	--
GM000135	99.6	9.1e-138	lce:LC2W_0112	K01992	ABC-2.P	ABC-2 type transport system permease protein	--
GM000137	100	0	lpap:LBPC_0114	K21636	nrdD	ribonucleoside-triphosphate reductase (formate)	1.1.98.6	Metabolism; Nucleotide metabolism; Purine metabolism [PATH:ko00230] Metabolism; Nucleotide metabolism; Pyrimidine metabolism [PATH:ko00240] Metabolism; Global and overview maps; Metabolic pathways [PATH:ko01100]
GM000138	97	2.1e-105	lce:LC2W_0115
GM000139	100	2e-20	lce:LC2W_0116
GM000140	99.3	9.1e-258	lcw:BN194_01280
GM000141	96.5	7.7e-55	lcl:LOCK919_0141
GM000142	100	1.5e-125	lpap:LBPC_0339
GM000143	99.2	9.5e-70	lpq:AF91_14915
GM000144	98.7	1.2e-257	lca:LSEI_0136
GM000145	100	1.2e-27	lcw:BN194_01320
GM000146	100	3.1e-43	lpq:AF91_14945
GM000147	100	2.9e-44	lcw:BN194_01340
GM000148	99.7	1e-186	lpq:AF91_14955
GM000149	100	2.8e-209	lce:LC2W_0125
GM000150	100	6.8e-42	lce:LC2W_0126
GM000151	99.7	5.1e-203	lca:LSEI_0143	K01921	ddl	D-alanine-D-alanine ligase	6.3.2.4	Metabolism; Metabolism of other amino acids; D-Alanine metabolism [PATH:ko00473] Metabolism; Glycan biosynthesis and metabolism; Peptidoglycan biosynthesis [PATH:ko00550] Metabolism; Global and overview maps; Metabolic pathways [PATH:ko01100] Human Diseases; Drug resistance: Antimicrobial; Vancomycin resistance [PATH:ko01502]
GM000152	98.2	2.5e-88	lcx:LCA12A_1078
GM000153	99.7	1.4e-191	lce:LC2W_0129	K03778	ldhA	D-lactate dehydrogenase	1.1.1.28	Metabolism; Carbohydrate metabolism; Pyruvate metabolism [PATH:ko00620] Metabolism; Global and overview maps; Microbial metabolism in diverse environments [PATH:ko01120]
GM000154	99	4.1e-46	lce:LC2W_0130
GM000155	99.4	3.7e-87	lcl:LOCK919_0153
GM000156	99.7	4.5e-171	lcz:LCAZH_0161
GM000157	96.2	5.9e-63	lcw:BN194_01450	K08987	K08987	putative membrane protein	--
GM000158	99.1	2.1e-57	lca:LSEI_0150
GM000159	100	8.9e-267	lcb:LCABL_01430	K06901	pbuG	putative MFS transporter, AGZA family, xanthine/uracil permease	--
GM000160	100	1.1e-55	lca:LSEI_0152	K09004	K09004	uncharacterized protein	--
GM000161	98.3	4.8e-57	lpi:LBPG_01700
GM000162	100	1e-138	lpi:LBPG_01701	K10831	tauB	taurine transport system ATP-binding protein	3.6.3.36	Metabolism; Energy metabolism; Sulfur metabolism [PATH:ko00920] Environmental Information Processing; Membrane transport; ABC transporters [PATH:ko02010]
GM000163	100	1.2e-151	lcz:LCAZH_0168	K15551	tauA	taurine transport system substrate-binding protein	--	Metabolism; Energy metabolism; Sulfur metabolism [PATH:ko00920] Environmental Information Processing; Membrane transport; ABC transporters [PATH:ko02010]
GM000164	100	1.3e-116	lcz:LCAZH_0169	K15552	tauC	taurine transport system permease protein	--	Metabolism; Energy metabolism; Sulfur metabolism [PATH:ko00920] Environmental Information Processing; Membrane transport; ABC transporters [PATH:ko02010]
GM000165	100	0	lcx:LCA12A_1091
GM000166	100	3e-261	lcl:LOCK919_0164	K07112	K07112	uncharacterized protein	--
GM000167	99.7	2.4e-172	lcl:LOCK919_0165
GM000168	98.9	1.5e-39	lpi:LBPG_01707
GM000169	100	1.5e-125	lpap:LBPC_0339
GM000170	98.8	1.3e-189	lca:LSEI_0153	K15975	K15975	glyoxalase family protein	--
GM000171	100	2.3e-45	lpi:LBPG_01710
GM000172	99	1.4e-103	lpq:AF91_00015
GM000173	99.3	0	lcz:LCAZH_0178
GM000174	99.2	7.9e-60	lcw:BN194_01530
GM000175	100	3.9e-144	lpq:AF91_00030
GM000176	100	7e-138	lcl:LOCK919_0173
GM000177	99.7	2.3e-192	lca:LSEI_0160
GM000178	98.7	1.2e-35	lcl:LOCK919_0175
GM000179	99.6	2.4e-280	lcb:LCABL_01560
GM000180	98.1	1.5e-143	lpq:AF91_00055
GM000182	100	4.4e-57	lpap:LBPC_0151
GM000183	100	1.2e-254	lpi:LBPG_01722	K07478	ycaJ	putative ATPase	--
GM000184	99.7	4.9e-223	lpq:AF91_00070	K00925	ackA	acetate kinase	2.7.2.1	Metabolism; Metabolism of other amino acids; Taurine and hypotaurine metabolism [PATH:ko00430] Metabolism; Carbohydrate metabolism; Pyruvate metabolism [PATH:ko00620] Metabolism; Carbohydrate metabolism; Propanoate metabolism [PATH:ko00640] Metabolism; Energy metabolism; Methane metabolism [PATH:ko00680] Metabolism; Energy metabolism; Carbon fixation pathways in prokaryotes [PATH:ko00720] Metabol…
GM000185	99.6	2.7e-159	lpq:AF91_00075	K07313	pphA	serine/threonine protein phosphatase 1	3.1.3.16
GM000186	99.6	6e-139	lpi:LBPG_01729	K07457	K07457	endonuclease III related protein	--
GM000187	100	3.7e-47	lcx:LCA12A_1114
GM000189	100	1.9e-100	lce:LC2W_0155
GM000190	99.6	3.7e-262	lpi:LBPG_01733
GM000191	100	9.4e-20	lca:LSEI_0173
GM000192	99.9	0	lcw:BN194_01710	K01621	xfp, xpk	xylulose-5-phosphate/fructose-6-phosphate phosphoketolase	4.1.2.9 4.1.2.22	Metabolism; Carbohydrate metabolism; Pentose phosphate pathway [PATH:ko00030] Metabolism; Energy metabolism; Carbon fixation in photosynthetic organisms [PATH:ko00710] Metabolism; Global and overview maps; Metabolic pathways [PATH:ko01100] Metabolism; Global and overview maps; Microbial metabolism in diverse environments [PATH:ko01120]
GM000193	100	0	lcb:LCABL_01690	K15580	oppA, mppA	oligopeptide transport system substrate-binding protein	--	Human Diseases; Drug resistance: Antimicrobial; beta-Lactam resistance [PATH:ko01501] Environmental Information Processing; Membrane transport; ABC transporters [PATH:ko02010] Cellular Processes; Cellular community - prokaryotes; Quorum sensing [PATH:ko02024]
GM000194	96.9	6.3e-142	lca:LSEI_0176
GM000195	96.2	2.1e-120	lpap:LBPC_0178
GM000196	95.4	2.7e-114	lpap:LBPC_0179
GM000197	98.2	4.1e-118	lca:LSEI_0178	K01990	ABC-2.A	ABC-2 type transport system ATP-binding protein	--
GM000198	99.4	3.4e-82	lca:LSEI_0179
GM000199	96.8	3.4e-79	lcs:LCBD_0172
GM000200	99.2	1.2e-215	lcz:LCAZH_0205
GM000201	100	8.8e-07	lpq:AF91_00270
GM000202	99.8	3.3e-291	lpq:AF91_00275
GM000203	100	6.6e-164	lcx:LCA12A_1126
GM000204	99.8	0	lpq:AF91_00285
GM000205	100	8e-262	lcl:LOCK919_0202
GM000206	100	6.6e-118	lpi:LBPG_01746
GM000207	100	1.2e-249	lpi:LBPG_01747	K06872	K06872	uncharacterized protein	--
GM000208	100	8.9e-147	lca:LSEI_0189	K07090	K07090	uncharacterized protein	--
GM000209	100	2.8e-60	lcl:LOCK919_0206
GM000210	98.5	1.7e-30	lrc:LOCK908_0217
GM000211	100	5.5e-94	lca:LSEI_0192
GM000212	100	5.2e-52	lcx:LCA12A_1135
GM000213	100	1.1e-82	lce:LC2W_0174
GM000214	100	2.3e-43	lpi:LBPG_03031
GM000215	100	2.1e-27	lce:LC2W_0176
GM000216	100	3.4e-174	lcs:LCBD_0186
GM000217	100	1.7e-71	lcb:LCABL_01870	K07006	K07006	uncharacterized protein	--
GM000218	100	2.6e-41	lcx:LCA12A_1141
GM000219	100	5.9e-91	lcl:LOCK919_0216
GM000220	100	2.4e-28	lcl:LOCK919_0217
GM000221	100	4.8e-69	lpap:LBPC_0203
GM000222	100	7.4e-73	lca:LSEI_0203
GM000223	100	5.4e-118	lcz:LCAZH_0228
GM000224	100	4.4e-163	lcx:LCA12A_1147
GM000225	100	1e-118	lra:LRHK_2605	K01304	pcp	pyroglutamyl-peptidase	3.4.19.3
GM000226	100	4.2e-109	lpap:LBPC_0209	K06988	fno	8-hydroxy-5-deazaflavin:NADPH oxidoreductase	1.5.1.40
GM000227	100	2.8e-127	lpap:LBPC_0210	K07009	K07009	uncharacterized protein	--
GM000228	100	9.9e-69	lcz:LCAZH_0233
GM000229	99.2	1.3e-133	lce:LC2W_0190	K03501	gidB, rsmG	16S rRNA (guanine527-N7)-methyltransferase	2.1.1.170
GM000230	99.6	5.1e-150	lcz:LCAZH_0235	K03497	parB, spo0J	chromosome partitioning protein, ParB family	--
GM000231	100	5.4e-138	lpap:LBPC_0214	K03496	parA, soj	chromosome partitioning protein	--
GM000232	100	4.1e-158	lcz:LCAZH_0237	K03497	parB, spo0J	chromosome partitioning protein, ParB family	--
GM000233	100	2.2e-28	lcx:LCA12A_1156
GM000234	100	2.4e-203	lpi:LBPG_01774	K06942	ychF	ribosome-binding ATPase	--
GM000235	99.6	3.5e-151	lce:LC2W_0196
GM000236	100	7.4e-277	lpi:LBPG_01776	K00088	IMPDH, guaB	IMP dehydrogenase	1.1.1.205	Metabolism; Nucleotide metabolism; Purine metabolism [PATH:ko00230] Metabolism; Xenobiotics biodegradation and metabolism; Drug metabolism - other enzymes [PATH:ko00983] Metabolism; Global and overview maps; Metabolic pathways [PATH:ko01100] Metabolism; Global and overview maps; Biosynthesis of secondary metabolites [PATH:ko01110]
GM000237	100	8e-81	lpq:AF91_00450
GM000238	100	3.7e-122	lpq:AF91_00455
GM000239	100	7.1e-222	lpq:AF91_00460
GM000240	99.8	1.4e-242	lcx:LCA12A_1163	K07258	dacC, dacA, dacD	serine-type D-Ala-D-Ala carboxypeptidase (penicillin-binding protein 5/6)	3.4.16.4	Metabolism; Glycan biosynthesis and metabolism; Peptidoglycan biosynthesis [PATH:ko00550] Metabolism; Global and overview maps; Metabolic pathways [PATH:ko01100]
GM000241	100	2.4e-80	lcz:LCAZH_0246	K03624	greA	transcription elongation factor GreA	--
GM000242	99.8	8.8e-297	lpap:LBPC_0225	K01928	murE	UDP-N-acetylmuramoyl-L-alanyl-D-glutamate--2,6-diaminopimelate ligase	6.3.2.13	Metabolism; Amino acid metabolism; Lysine biosynthesis [PATH:ko00300] Metabolism; Glycan biosynthesis and metabolism; Peptidoglycan biosynthesis [PATH:ko00550]
GM000243	99.2	9.6e-140	lca:LSEI_0224	K01779	racD	aspartate racemase	5.1.1.13	Metabolism; Amino acid metabolism; Alanine, aspartate and glutamate metabolism [PATH:ko00250] Metabolism; Metabolism of terpenoids and polyketides; Nonribosomal peptide structures [PATH:ko01054]
GM000244	99.3	3.2e-163	lpq:AF91_00485
GM000245	99.3	2.4e-144	lce:LC2W_0206	K06608	iolR	DeoR family transcriptional regulator, myo-inositol catabolism operon repressor	--
GM000246	99.8	8.2e-276	lcx:LCA12A_1169
GM000247	100	1.2e-282	lcb:LCABL_02170	K00140	mmsA, iolA, ALDH6A1	malonate-semialdehyde dehydrogenase (acetylating) / methylmalonate-semialdehyde dehydrogenase	1.2.1.18 1.2.1.27	Metabolism; Amino acid metabolism; Valine, leucine and isoleucine degradation [PATH:ko00280] Metabolism; Metabolism of other amino acids; beta-Alanine metabolism [PATH:ko00410] Metabolism; Carbohydrate metabolism; Inositol phosphate metabolism [PATH:ko00562] Metabolism; Carbohydrate metabolism; Propanoate metabolism [PATH:ko00640] Metabolism; Global and overview maps; Metabolic pathways [PATH:ko0…
GM000248	100	5.1e-155	lcb:LCABL_02180	K03337	iolB	5-deoxy-glucuronate isomerase	5.3.1.30	Metabolism; Carbohydrate metabolism; Inositol phosphate metabolism [PATH:ko00562] Metabolism; Global and overview maps; Metabolic pathways [PATH:ko01100] Metabolism; Global and overview maps; Microbial metabolism in diverse environments [PATH:ko01120]
GM000249	100	9.4e-180	lcs:LCBD_0219	K03338	iolC	5-dehydro-2-deoxygluconokinase	2.7.1.92	Metabolism; Carbohydrate metabolism; Inositol phosphate metabolism [PATH:ko00562] Metabolism; Global and overview maps; Metabolic pathways [PATH:ko01100] Metabolism; Global and overview maps; Microbial metabolism in diverse environments [PATH:ko01120]
GM000250	99.8	0	lcz:LCAZH_0255	K03336	iolD	3D-(3,5/4)-trihydroxycyclohexane-1,2-dione acylhydrolase (decyclizing)	3.7.1.22	Metabolism; Carbohydrate metabolism; Inositol phosphate metabolism [PATH:ko00562] Metabolism; Global and overview maps; Metabolic pathways [PATH:ko01100] Metabolism; Global and overview maps; Microbial metabolism in diverse environments [PATH:ko01120]
GM000251	100	7.1e-194	lcb:LCABL_02210	K00010	iolG	myo-inositol 2-dehydrogenase / D-chiro-inositol 1-dehydrogenase	1.1.1.18 1.1.1.369	Metabolism; Biosynthesis of other secondary metabolites; Streptomycin biosynthesis [PATH:ko00521] Metabolism; Carbohydrate metabolism; Inositol phosphate metabolism [PATH:ko00562] Metabolism; Global and overview maps; Metabolic pathways [PATH:ko01100] Metabolism; Global and overview maps; Microbial metabolism in diverse environments [PATH:ko01120] Metabolism; Global and overview maps; Biosynthesi…
GM000252	100	3.2e-194	lcw:BN194_02280	K00010	iolG	myo-inositol 2-dehydrogenase / D-chiro-inositol 1-dehydrogenase	1.1.1.18 1.1.1.369	Metabolism; Biosynthesis of other secondary metabolites; Streptomycin biosynthesis [PATH:ko00521] Metabolism; Carbohydrate metabolism; Inositol phosphate metabolism [PATH:ko00562] Metabolism; Global and overview maps; Metabolic pathways [PATH:ko01100] Metabolism; Global and overview maps; Microbial metabolism in diverse environments [PATH:ko01120] Metabolism; Global and overview maps; Biosynthesi…
GM000253	99.7	2.5e-174	lcb:LCABL_02230	K03335	iolE	inosose dehydratase	4.2.1.44	Metabolism; Carbohydrate metabolism; Inositol phosphate metabolism [PATH:ko00562] Metabolism; Global and overview maps; Metabolic pathways [PATH:ko01100] Metabolism; Global and overview maps; Microbial metabolism in diverse environments [PATH:ko01120]
GM000254	99.7	2.8e-159	lcx:LCA12A_1178	K03339	iolJ	6-phospho-5-dehydro-2-deoxy-D-gluconate aldolase	4.1.2.29	Metabolism; Carbohydrate metabolism; Inositol phosphate metabolism [PATH:ko00562] Metabolism; Global and overview maps; Metabolic pathways [PATH:ko01100] Metabolism; Global and overview maps; Microbial metabolism in diverse environments [PATH:ko01120]
GM000255	100	7.3e-67	lcz:LCAZH_0260
GM000256	100	4.6e-151	lcl:LOCK919_0253
GM000257	100	5e-170	lpi:LBPG_01797	K00033	PGD, gnd, gntZ	6-phosphogluconate dehydrogenase	1.1.1.44 1.1.1.343	Metabolism; Carbohydrate metabolism; Pentose phosphate pathway [PATH:ko00030] Metabolism; Metabolism of other amino acids; Glutathione metabolism [PATH:ko00480] Metabolism; Global and overview maps; Metabolic pathways [PATH:ko01100] Metabolism; Global and overview maps; Biosynthesis of secondary metabolites [PATH:ko01110] Metabolism; Global and overview maps; Microbial metabolism in diverse envir…
GM000258	99.4	7.5e-271	lcb:LCABL_01280
GM000259	100	7.5e-304	lca:LSEI_0228	K00851	E2.7.1.12, gntK, idnK	gluconokinase	2.7.1.12	Metabolism; Carbohydrate metabolism; Pentose phosphate pathway [PATH:ko00030] Metabolism; Global and overview maps; Metabolic pathways [PATH:ko01100] Metabolism; Global and overview maps; Biosynthesis of secondary metabolites [PATH:ko01110] Metabolism; Global and overview maps; Microbial metabolism in diverse environments [PATH:ko01120] Metabolism; Global and overview maps; Biosynthesis of antibi…
GM000260	99.8	1.3e-243	lca:LSEI_0229	K03299	TC.GNTP	gluconate:H+ symporter, GntP family	--
GM000261	100	7.1e-58	lce:LC2W_0230
GM000262	99.6	1.9e-129	lpap:LBPC_0234	K02074	ABC.ZM.A	zinc/manganese transport system ATP-binding protein	--
GM000263	100	5.4e-141	lca:LSEI_0243	K02075	ABC.ZM.P	zinc/manganese transport system permease protein	--
GM000264	99.3	4.4e-165	lca:LSEI_0244
GM000265	98.6	1.4e-161	lcw:BN194_02520	K00020	mmsB, HIBADH	3-hydroxyisobutyrate dehydrogenase	1.1.1.31	Metabolism; Amino acid metabolism; Valine, leucine and isoleucine degradation [PATH:ko00280] Metabolism; Global and overview maps; Metabolic pathways [PATH:ko01100]
GM000266	100	0	lcb:LCABL_02440	K08602	pepF, pepB	oligoendopeptidase F	3.4.24.-
GM000267	98.6	5.2e-203	lpi:LBPG_01807
GM000268	99.6	1.1e-255	lpap:LBPC_0240	K03311	TC.LIVCS	branched-chain amino acid:cation transporter, LIVCS family	--
GM000269	100	6.5e-119	lcl:LOCK919_0267
GM000270	99.6	1.7e-133	lpi:LBPG_01811	K22103	glcR	DeoR family transcriptional regulator, carbon catabolite repression regulator	--
GM000271	100	2.9e-147	lcl:LOCK919_0269
GM000272	99.2	3.9e-141	lce:LC2W_0241
GM000273	100	1.3e-40	lce:LC2W_0242
GM000274	100	1.5e-125	lpap:LBPC_2811
GM000275	100	3.4e-108	lcw:BN194_02610	K03100	lepB	signal peptidase I	3.4.21.89	Cellular Processes; Cellular community - prokaryotes; Quorum sensing [PATH:ko02024] Genetic Information Processing; Folding, sorting and degradation; Protein export [PATH:ko03060]
GM000276	99	1.6e-176	lpap:LBPC_0247
GM000277	95.7	3.9e-15	lcl:LOCK919_0274
GM000278	99.8	4.1e-294	lcw:BN194_02630
GM000279	99.6	5.7e-137	lcx:LCA12A_1200
GM000280	100	1.5e-35	lrh:LGG_00813
GM000281	77.8	1.1e-11	baco:OXB_1053
GM000282	100	2.8e-50	lrl:LC705_00833
GM000283	99.1	9.9e-57	lcx:LCA12A_2499	K03671	trxA	thioredoxin 1	--	Organismal Systems; Immune system; NOD-like receptor signaling pathway [PATH:ko04621] Human Diseases; Cardiovascular diseases; Fluid shear stress and atherosclerosis [PATH:ko05418]
GM000284	100	3.8e-139	lcz:LCAZH_0286
GM000285	99.3	2e-79	lcl:LOCK919_0282
GM000286	91.2	1.3e-31	lca:LSEI_0264
GM000287	100	1.1e-219	lcz:LCAZH_0289	K01999	livK	branched-chain amino acid transport system substrate-binding protein	--	Environmental Information Processing; Membrane transport; ABC transporters [PATH:ko02010] Cellular Processes; Cellular community - prokaryotes; Quorum sensing [PATH:ko02024]
GM000288	99.7	1e-156	lca:LSEI_0266	K01997	livH	branched-chain amino acid transport system permease protein	--	Environmental Information Processing; Membrane transport; ABC transporters [PATH:ko02010] Cellular Processes; Cellular community - prokaryotes; Quorum sensing [PATH:ko02024]
GM000289	100	3e-170	lcx:LCA12A_2504	K01998	livM	branched-chain amino acid transport system permease protein	--	Environmental Information Processing; Membrane transport; ABC transporters [PATH:ko02010] Cellular Processes; Cellular community - prokaryotes; Quorum sensing [PATH:ko02024]
GM000290	100	4.1e-141	lpap:LBPC_0256	K01995	livG	branched-chain amino acid transport system ATP-binding protein	--	Environmental Information Processing; Membrane transport; ABC transporters [PATH:ko02010] Cellular Processes; Cellular community - prokaryotes; Quorum sensing [PATH:ko02024]
GM000291	100	2.2e-125	lcl:LOCK919_0287	K01996	livF	branched-chain amino acid transport system ATP-binding protein	--	Environmental Information Processing; Membrane transport; ABC transporters [PATH:ko02010] Cellular Processes; Cellular community - prokaryotes; Quorum sensing [PATH:ko02024]
GM000292	100	6.2e-170	lpap:LBPC_0258
GM000293	99.8	1.9e-247	lpap:LBPC_0259	K02761	PTS-Cel-EIIC, celB, chbC	PTS system, cellobiose-specific IIC component	--	Metabolism; Carbohydrate metabolism; Starch and sucrose metabolism [PATH:ko00500] Environmental Information Processing; Membrane transport; Phosphotransferase system (PTS) [PATH:ko02060]
GM000294	100	5.3e-121	lcz:LCAZH_0296
GM000295	99.5	1.8e-118	lce:LC2W_0261	K01619	deoC, DERA	deoxyribose-phosphate aldolase	4.1.2.4	Metabolism; Carbohydrate metabolism; Pentose phosphate pathway [PATH:ko00030]
GM000296	100	2.7e-229	lce:LC2W_0262	K01839	deoB	phosphopentomutase	5.4.2.7	Metabolism; Carbohydrate metabolism; Pentose phosphate pathway [PATH:ko00030] Metabolism; Nucleotide metabolism; Purine metabolism [PATH:ko00230]
GM000297	99.6	2.1e-128	lcz:LCAZH_0299	K03784	deoD	purine-nucleoside phosphorylase	2.4.2.1	Metabolism; Nucleotide metabolism; Purine metabolism [PATH:ko00230] Metabolism; Nucleotide metabolism; Pyrimidine metabolism [PATH:ko00240] Metabolism; Metabolism of cofactors and vitamins; Nicotinate and nicotinamide metabolism [PATH:ko00760] Metabolism; Global and overview maps; Metabolic pathways [PATH:ko01100] Metabolism; Global and overview maps; Biosynthesis of secondary metabolites [PATH:k…
GM000298	97.6	4.6e-271	lpq:AF91_00705	K21471	cwlO	peptidoglycan DL-endopeptidase CwlO	3.4.-.-
GM000300	100	1.9e-22	lcl:LOCK919_0295
GM000301	100	3e-26	lcs:LCBD_0276
GM000302	95	9.3e-25	lcl:LOCK919_0298
GM000303	99.1	1.5e-260	lpap:LBPC_0268
GM000304	100	1.5e-162	lpi:LBPG_02449
GM000305	99.6	2.5e-123	lcl:LOCK919_0301
GM000306	99.5	0	lpq:AF91_00740
GM000307	99.5	1.6e-243	lcs:LCBD_0282	K02027	ABC.MS.S	multiple sugar transport system substrate-binding protein	--
GM000308	99.6	5.8e-123	lca:LSEI_0290
GM000309	98.8	0	lpap:LBPC_0274	K12373	HEXA_B	hexosaminidase	3.2.1.52	Metabolism; Glycan biosynthesis and metabolism; Other glycan degradation [PATH:ko00511] Metabolism; Glycan biosynthesis and metabolism; Various types of N-glycan biosynthesis [PATH:ko00513] Metabolism; Carbohydrate metabolism; Amino sugar and nucleotide sugar metabolism [PATH:ko00520] Metabolism; Glycan biosynthesis and metabolism; Glycosaminoglycan degradation [PATH:ko00531] Metabolism; Glycan b…
GM000310	99.7	2.7e-201	lce:LC2W_0276	K01809	manA, MPI	mannose-6-phosphate isomerase	5.3.1.8	Metabolism; Carbohydrate metabolism; Fructose and mannose metabolism [PATH:ko00051] Metabolism; Carbohydrate metabolism; Amino sugar and nucleotide sugar metabolism [PATH:ko00520] Metabolism; Global and overview maps; Metabolic pathways [PATH:ko01100] Metabolism; Global and overview maps; Biosynthesis of secondary metabolites [PATH:ko01110] Metabolism; Global and overview maps; Biosynthesis of an…
GM000311	100	7.7e-131	lcz:LCAZH_0315	K03710	K03710	GntR family transcriptional regulator	--
GM000312	99.2	9.5e-219	lcs:LCBD_0287	K02082	agaS	tagatose-6-phosphate ketose/aldose isomerase	5.-.-.-
GM000313	99.7	3e-225	lcs:LCBD_0288	K01443	nagA, AMDHD2	N-acetylglucosamine-6-phosphate deacetylase	3.5.1.25	Metabolism; Carbohydrate metabolism; Amino sugar and nucleotide sugar metabolism [PATH:ko00520] Metabolism; Global and overview maps; Biosynthesis of antibiotics [PATH:ko01130]
GM000314	99.3	0	lce:LC2W_0280	K12308	bgaB, lacA	beta-galactosidase	3.2.1.23	Metabolism; Carbohydrate metabolism; Galactose metabolism [PATH:ko00052]
GM000315	98.8	9.9e-82	lpq:AF91_00790
GM000316	100	1e-167	lpq:AF91_00795	K02795	PTS-Man-EIIC, manY	PTS system, mannose-specific IIC component	--	Metabolism; Carbohydrate metabolism; Fructose and mannose metabolism [PATH:ko00051] Metabolism; Carbohydrate metabolism; Amino sugar and nucleotide sugar metabolism [PATH:ko00520] Metabolism; Global and overview maps; Metabolic pathways [PATH:ko01100] Environmental Information Processing; Membrane transport; Phosphotransferase system (PTS) [PATH:ko02060]
GM000317	100	1.1e-149	lce:LC2W_0283	K02796	PTS-Man-EIID, manZ	PTS system, mannose-specific IID component	--	Metabolism; Carbohydrate metabolism; Fructose and mannose metabolism [PATH:ko00051] Metabolism; Carbohydrate metabolism; Amino sugar and nucleotide sugar metabolism [PATH:ko00520] Metabolism; Global and overview maps; Metabolic pathways [PATH:ko01100] Environmental Information Processing; Membrane transport; Phosphotransferase system (PTS) [PATH:ko02060]
GM000318	100	2.5e-64	lcx:LCA12A_2532	K02793	PTS-Man-EIIA, manX	PTS system, mannose-specific IIA component	2.7.1.191	Metabolism; Carbohydrate metabolism; Fructose and mannose metabolism [PATH:ko00051] Metabolism; Carbohydrate metabolism; Amino sugar and nucleotide sugar metabolism [PATH:ko00520] Metabolism; Global and overview maps; Metabolic pathways [PATH:ko01100] Environmental Information Processing; Membrane transport; Phosphotransferase system (PTS) [PATH:ko02060]
GM000319	99.5	5.5e-233	lcl:LOCK919_0321
GM000320	99.8	4.1e-233	lpq:AF91_00815	K14155	patB, malY	cysteine-S-conjugate beta-lyase	4.4.1.13	Metabolism; Amino acid metabolism; Cysteine and methionine metabolism [PATH:ko00270] Metabolism; Metabolism of other amino acids; Selenocompound metabolism [PATH:ko00450] Metabolism; Global and overview maps; Metabolic pathways [PATH:ko01100] Metabolism; Global and overview maps; Biosynthesis of secondary metabolites [PATH:ko01110] Metabolism; Global and overview maps; Biosynthesis of amino acids…
GM000321	99.2	1.5e-199	lcz:LCAZH_0331	K01262	pepP	Xaa-Pro aminopeptidase	3.4.11.9
GM000322	99.5	9.3e-255	lcl:LOCK919_0324	K02761	PTS-Cel-EIIC, celB, chbC	PTS system, cellobiose-specific IIC component	--	Metabolism; Carbohydrate metabolism; Starch and sucrose metabolism [PATH:ko00500] Environmental Information Processing; Membrane transport; Phosphotransferase system (PTS) [PATH:ko02060]
GM000323	100	1.6e-50	lcw:BN194_03070	K02760	PTS-Cel-EIIB, celA, chbB	PTS system, cellobiose-specific IIB component	2.7.1.196 2.7.1.205	Metabolism; Carbohydrate metabolism; Starch and sucrose metabolism [PATH:ko00500] Environmental Information Processing; Membrane transport; Phosphotransferase system (PTS) [PATH:ko02060]
GM000324	98.2	1.9e-52	lpq:AF91_00835	K02759	PTS-Cel-EIIA, celC, chbA	PTS system, cellobiose-specific IIA component	2.7.1.196 2.7.1.205	Metabolism; Carbohydrate metabolism; Starch and sucrose metabolism [PATH:ko00500] Environmental Information Processing; Membrane transport; Phosphotransferase system (PTS) [PATH:ko02060]
GM000325	99.7	8.7e-192	lpap:LBPC_0293
GM000326	99.5	0	lpi:LBPG_02477	K03491	licR	lichenan operon transcriptional antiterminator	--
GM000328	99.8	6.6e-239	lcz:LCAZH_0338	K01258	pepT	tripeptide aminopeptidase	3.4.11.4
GM000329	100	0	lcl:LOCK919_0330	K15580	oppA, mppA	oligopeptide transport system substrate-binding protein	--	Human Diseases; Drug resistance: Antimicrobial; beta-Lactam resistance [PATH:ko01501] Environmental Information Processing; Membrane transport; ABC transporters [PATH:ko02010] Cellular Processes; Cellular community - prokaryotes; Quorum sensing [PATH:ko02024]
GM000330	93.4	1.9e-112	lcl:LOCK919_0331
GM000331	100	1.5e-41	lpq:AF91_00865
GM000332	100	7.3e-12	lcl:LOCK919_0332
GM000333	88.2	1.5e-07	lcz:LCAZH_0341
GM000334	100	6.2e-99	lpap:LBPC_0298	K16925	ykoE	energy-coupling factor transport system substrate-specific component	--
GM000335	98.9	1.2e-246	lcl:LOCK919_0334	K16786	ecfA1	energy-coupling factor transport system ATP-binding protein	3.6.3.-	Environmental Information Processing; Membrane transport; ABC transporters [PATH:ko02010]
GM000336	99.5	1.3e-113	lpq:AF91_00880	K16785	ecfT	energy-coupling factor transport system permease protein	--	Environmental Information Processing; Membrane transport; ABC transporters [PATH:ko02010]
GM000337	99.1	1.6e-128	lce:LC2W_0306	K03707	tenA	thiaminase (transcriptional activator TenA)	3.5.99.2	Metabolism; Metabolism of cofactors and vitamins; Thiamine metabolism [PATH:ko00730] Metabolism; Global and overview maps; Metabolic pathways [PATH:ko01100]
GM000338	98	1.4e-80	lca:LSEI_0298
GM000339	98.9	4.6e-151	lce:LC2W_0308	K00878	thiM	hydroxyethylthiazole kinase	2.7.1.50	Metabolism; Metabolism of cofactors and vitamins; Thiamine metabolism [PATH:ko00730] Metabolism; Global and overview maps; Metabolic pathways [PATH:ko01100]
GM000340	98.1	6.7e-110	lcw:BN194_03210	K00788	thiE	thiamine-phosphate pyrophosphorylase	2.5.1.3	Metabolism; Metabolism of cofactors and vitamins; Thiamine metabolism [PATH:ko00730] Metabolism; Global and overview maps; Metabolic pathways [PATH:ko01100]
GM000341	99.3	1.9e-149	lce:LC2W_0310	K00941	thiD	hydroxymethylpyrimidine/phosphomethylpyrimidine kinase	2.7.1.49 2.7.4.7	Metabolism; Metabolism of cofactors and vitamins; Thiamine metabolism [PATH:ko00730] Metabolism; Global and overview maps; Metabolic pathways [PATH:ko01100]
GM000343	100	1.1e-272	lcb:LCABL_03180
GM000344	97.6	2.5e-36	lpap:LBPC_0307
GM000345	100	8.2e-187	lcs:LCBD_0321	K02529	lacI, galR	LacI family transcriptional regulator	--
GM000346	97.7	3.1e-65	lcz:LCAZH_0355	K06726	rbsD	D-ribose pyranase	5.4.99.62	Environmental Information Processing; Membrane transport; ABC transporters [PATH:ko02010]
GM000347	99.8	1e-281	lcs:LCBD_0323	K10441	rbsA	ribose transport system ATP-binding protein	3.6.3.17	Environmental Information Processing; Membrane transport; ABC transporters [PATH:ko02010]
GM000348	99.7	7.2e-172	lce:LC2W_0318	K10440	rbsC	ribose transport system permease protein	--	Environmental Information Processing; Membrane transport; ABC transporters [PATH:ko02010]
GM000349	99.7	2.1e-171	lcz:LCAZH_0358	K10439	rbsB	ribose transport system substrate-binding protein	--	Environmental Information Processing; Membrane transport; ABC transporters [PATH:ko02010] Cellular Processes; Cell motility; Bacterial chemotaxis [PATH:ko02030]
GM000350	100	5.6e-166	lcx:LCA12A_2566	K00852	rbsK, RBKS	ribokinase	2.7.1.15	Metabolism; Carbohydrate metabolism; Pentose phosphate pathway [PATH:ko00030]
GM000351	97.8	5.4e-17	lcz:LCAZH_2925	K19159	yefM	antitoxin YefM	--
GM000352	99.8	0	lcb:LCABL_03280	K21467	pbpC	penicillin-binding protein 3	--
GM000353	98.4	9e-242	lcb:LCABL_03290
GM000354	99.3	9.9e-73	lpq:AF91_00970
GM000355	98.9	4.4e-105	lcx:LCA12A_2576
GM000356	100	3.5e-31	lce:LC2W_0326
GM000357	97.6	1.4e-14	lcz:LCAZH_0371
GM000358	98.3	4.7e-125	lcs:LCBD_0334
GM000359	92.1	6.6e-75	lce:LC2W_0329
GM000360	98.4	4.3e-67	lce:LC2W_0330
GM000361	100	1.1e-94	lcs:LCBD_0337
GM000362	83.3	1.6e-92	lrl:LC705_00377	K01990	ABC-2.A	ABC-2 type transport system ATP-binding protein	--
GM000363	100	1.7e-133	lcs:LCBD_0341
GM000364	100	5.9e-121	lcs:LCBD_0342
GM000365	100	1.5e-125	lrh:LGG_00464
GM000366	98.6	3.4e-149	lcw:BN194_03470
GM000367	99.6	2.8e-287	lcl:LOCK919_0365	K00244	frdA	fumarate reductase flavoprotein subunit	1.3.5.4	Metabolism; Carbohydrate metabolism; Citrate cycle (TCA cycle) [PATH:ko00020] Metabolism; Energy metabolism; Oxidative phosphorylation [PATH:ko00190] Metabolism; Carbohydrate metabolism; Pyruvate metabolism [PATH:ko00620] Metabolism; Carbohydrate metabolism; Butanoate metabolism [PATH:ko00650] Metabolism; Energy metabolism; Carbon fixation pathways in prokaryotes [PATH:ko00720] Metabolism; Global…
GM000368	99.7	0	lpap:LBPC_0325
GM000369	100	3.8e-37	lca:LSEI_0325	K02822	PTS-Ula-EIIB, ulaB, sgaB	PTS system, ascorbate-specific IIB component	2.7.1.194	Metabolism; Carbohydrate metabolism; Ascorbate and aldarate metabolism [PATH:ko00053] Metabolism; Global and overview maps; Metabolic pathways [PATH:ko01100] Metabolism; Global and overview maps; Microbial metabolism in diverse environments [PATH:ko01120] Environmental Information Processing; Membrane transport; Phosphotransferase system (PTS) [PATH:ko02060]
GM000370	100	2e-238	lcl:LOCK919_0368	K03475	PTS-Ula-EIIC, ulaA, sgaT	PTS system, ascorbate-specific IIC component	--	Metabolism; Carbohydrate metabolism; Ascorbate and aldarate metabolism [PATH:ko00053] Metabolism; Global and overview maps; Metabolic pathways [PATH:ko01100] Metabolism; Global and overview maps; Microbial metabolism in diverse environments [PATH:ko01120] Environmental Information Processing; Membrane transport; Phosphotransferase system (PTS) [PATH:ko02060]
GM000371	100	1.4e-71	lcx:LCA12A_2584
GM000372	100	6e-162	lcx:LCA12A_2585	K01624	FBA, fbaA	fructose-bisphosphate aldolase, class II	4.1.2.13	Metabolism; Carbohydrate metabolism; Glycolysis / Gluconeogenesis [PATH:ko00010] Metabolism; Carbohydrate metabolism; Pentose phosphate pathway [PATH:ko00030] Metabolism; Carbohydrate metabolism; Fructose and mannose metabolism [PATH:ko00051] Metabolism; Energy metabolism; Methane metabolism [PATH:ko00680] Metabolism; Energy metabolism; Carbon fixation in photosynthetic organisms [PATH:ko00710] M…
GM000373	99.1	2.8e-116	lpq:AF91_01070
GM000374	100	6e-142	lcw:BN194_03570
GM000375	100	6.5e-156	lpi:LBPG_02524
GM000376	99.4	2.8e-179	lcx:LCA12A_2589
GM000377	100	8.5e-89	lcx:LCA12A_2590
GM000378	100	1.5e-125	lpap:LBPC_2811
GM000380	100	1.8e-30	lcx:LCA12A_2591
GM000381	100	9.7e-15	lce:LC2W_0352
GM000382	95.6	3.8e-15	lcl:LOCK919_0379
GM000383	92.9	1.1e-22	lcw:BN194_03670
GM000384	98.2	1.5e-55	lcw:BN194_03680
GM000385	87.9	1.9e-22	lcs:LCBD_0363
GM000386	100	1.3e-65	lcs:LCBD_0364	K07006	K07006	uncharacterized protein	--
GM000389	90.6	7.6e-25	lcx:LCA12A_2596
GM000390	99.4	7.5e-271	lcs:LCBD_0339
GM000391	88.6	1.8e-11	lcb:LCABL_03640
GM000392	99.6	4.5e-154	lpi:LBPG_02535	K17836	penP	beta-lactamase class A	3.5.2.6	Metabolism; Biosynthesis of other secondary metabolites; Penicillin and cephalosporin biosynthesis [PATH:ko00311] Metabolism; Global and overview maps; Biosynthesis of antibiotics [PATH:ko01130] Human Diseases; Drug resistance: Antimicrobial; beta-Lactam resistance [PATH:ko01501]
GM000393	99.4	2.8e-90	lcw:BN194_03760
GM000394	100	4.3e-180	lcw:BN194_03780	K02529	lacI, galR	LacI family transcriptional regulator	--
GM000395	100	1.1e-147	lce:LC2W_0369	K02795	PTS-Man-EIIC, manY	PTS system, mannose-specific IIC component	--	Metabolism; Carbohydrate metabolism; Fructose and mannose metabolism [PATH:ko00051] Metabolism; Carbohydrate metabolism; Amino sugar and nucleotide sugar metabolism [PATH:ko00520] Metabolism; Global and overview maps; Metabolic pathways [PATH:ko01100] Environmental Information Processing; Membrane transport; Phosphotransferase system (PTS) [PATH:ko02060]
GM000396	99.2	2.1e-132	lcb:LCABL_03710
GM000397	82.5	2.2e-228	lct:BI355_0118
GM000398	97.6	2.5e-168	lcw:BN194_03840
GM000399	98.9	1.1e-138	lcw:BN194_03850	K07090	K07090	uncharacterized protein	--
GM000400	93.1	1.5e-185	lcs:LCBD_0381	K06871	K06871	uncharacterized protein	--
GM000401	98.6	7.3e-131	lcs:LCBD_0387
GM000402	100	2e-154	lcw:BN194_03920	K02796	PTS-Man-EIID, manZ	PTS system, mannose-specific IID component	--	Metabolism; Carbohydrate metabolism; Fructose and mannose metabolism [PATH:ko00051] Metabolism; Carbohydrate metabolism; Amino sugar and nucleotide sugar metabolism [PATH:ko00520] Metabolism; Global and overview maps; Metabolic pathways [PATH:ko01100] Environmental Information Processing; Membrane transport; Phosphotransferase system (PTS) [PATH:ko02060]
GM000403	99.6	2.2e-139	lce:LC2W_0384	K02795	PTS-Man-EIIC, manY	PTS system, mannose-specific IIC component	--	Metabolism; Carbohydrate metabolism; Fructose and mannose metabolism [PATH:ko00051] Metabolism; Carbohydrate metabolism; Amino sugar and nucleotide sugar metabolism [PATH:ko00520] Metabolism; Global and overview maps; Metabolic pathways [PATH:ko01100] Environmental Information Processing; Membrane transport; Phosphotransferase system (PTS) [PATH:ko02060]
GM000404	100	4e-92	lcw:BN194_03940	K02794	PTS-Man-EIIB, manX	PTS system, mannose-specific IIB component	2.7.1.191	Metabolism; Carbohydrate metabolism; Fructose and mannose metabolism [PATH:ko00051] Metabolism; Carbohydrate metabolism; Amino sugar and nucleotide sugar metabolism [PATH:ko00520] Metabolism; Global and overview maps; Metabolic pathways [PATH:ko01100] Environmental Information Processing; Membrane transport; Phosphotransferase system (PTS) [PATH:ko02060]
GM000405	100	4.8e-69	lcb:LCABL_03880	K02793	PTS-Man-EIIA, manX	PTS system, mannose-specific IIA component	2.7.1.191	Metabolism; Carbohydrate metabolism; Fructose and mannose metabolism [PATH:ko00051] Metabolism; Carbohydrate metabolism; Amino sugar and nucleotide sugar metabolism [PATH:ko00520] Metabolism; Global and overview maps; Metabolic pathways [PATH:ko01100] Environmental Information Processing; Membrane transport; Phosphotransferase system (PTS) [PATH:ko02060]
GM000406	99.9	0	lcw:BN194_03960	K19505	gfrR	sigma-54 dependent transcriptional regulator, gfr operon transcriptional activator	--
GM000407	100	1.5e-125	lpap:LBPC_0581
GM000409	99.5	2.7e-246	lcb:LCABL_03900	K03092	rpoN	RNA polymerase sigma-54 factor	--	Environmental Information Processing; Signal transduction; Two-component system [PATH:ko02020] Cellular Processes; Cellular community - prokaryotes; Biofilm formation - Vibrio cholerae [PATH:ko05111]
GM000410	98.8	8.9e-267	lcb:LCABL_03910	K02538	manR	activator of the mannose operon, transcriptional antiterminator	--
GM000411	98.7	2.2e-78	lcs:LCBD_0395	K02806	PTS-Ntr-EIIA, ptsN	PTS system, nitrogen regulatory IIA component	2.7.1.-	Environmental Information Processing; Membrane transport; Phosphotransferase system (PTS) [PATH:ko02060]
GM000412	99.7	1.3e-173	lcw:BN194_04000	K01624	FBA, fbaA	fructose-bisphosphate aldolase, class II	4.1.2.13	Metabolism; Carbohydrate metabolism; Glycolysis / Gluconeogenesis [PATH:ko00010] Metabolism; Carbohydrate metabolism; Pentose phosphate pathway [PATH:ko00030] Metabolism; Carbohydrate metabolism; Fructose and mannose metabolism [PATH:ko00051] Metabolism; Energy metabolism; Methane metabolism [PATH:ko00680] Metabolism; Energy metabolism; Carbon fixation in photosynthetic organisms [PATH:ko00710] M…
GM000413	99.4	5.7e-80	lcw:BN194_04010	K02768	PTS-Fru-EIIA, fruB	PTS system, fructose-specific IIA component	2.7.1.202	Metabolism; Carbohydrate metabolism; Fructose and mannose metabolism [PATH:ko00051] Metabolism; Global and overview maps; Metabolic pathways [PATH:ko01100] Metabolism; Global and overview maps; Microbial metabolism in diverse environments [PATH:ko01120] Environmental Information Processing; Membrane transport; Phosphotransferase system (PTS) [PATH:ko02060]
GM000414	100	8.6e-50	lcw:BN194_04020	K02769	PTS-Fru-EIIB, fruA	PTS system, fructose-specific IIB component	2.7.1.202	Metabolism; Carbohydrate metabolism; Fructose and mannose metabolism [PATH:ko00051] Metabolism; Global and overview maps; Metabolic pathways [PATH:ko01100] Metabolism; Global and overview maps; Microbial metabolism in diverse environments [PATH:ko01120] Environmental Information Processing; Membrane transport; Phosphotransferase system (PTS) [PATH:ko02060]
GM000415	99.7	7e-200	lce:LC2W_0394	K02770	PTS-Fru-EIIC, fruA	PTS system, fructose-specific IIC component	--	Metabolism; Carbohydrate metabolism; Fructose and mannose metabolism [PATH:ko00051] Metabolism; Global and overview maps; Metabolic pathways [PATH:ko01100] Metabolism; Global and overview maps; Microbial metabolism in diverse environments [PATH:ko01120] Environmental Information Processing; Membrane transport; Phosphotransferase system (PTS) [PATH:ko02060]
GM000416	99.4	9.1e-183	lce:LC2W_0395
GM000417	99.1	2.3e-132	lcw:BN194_04050	K09988	lyxA	D-lyxose ketol-isomerase	5.3.1.15	Metabolism; Carbohydrate metabolism; Pentose and glucuronate interconversions [PATH:ko00040]
GM000418	97.7	4.3e-277	lcs:LCBD_0402	K00854	xylB, XYLB	xylulokinase	2.7.1.17	Metabolism; Carbohydrate metabolism; Pentose and glucuronate interconversions [PATH:ko00040] Metabolism; Global and overview maps; Metabolic pathways [PATH:ko01100]
GM000419	98.6	2.4e-74	lcb:LCABL_04010	K11201	PTS-Fru2-EIIA	PTS system, fructose-specific IIA-like component	2.7.1.-
GM000420	100	8.5e-292	lcs:LCBD_0405	K11202	PTS-Fru2-EIIB	PTS system, fructose-specific IIB-like component	2.7.1.-
GM000421	99.5	2.1e-226	lcw:BN194_04100	K14155	patB, malY	cysteine-S-conjugate beta-lyase	4.4.1.13	Metabolism; Amino acid metabolism; Cysteine and methionine metabolism [PATH:ko00270] Metabolism; Metabolism of other amino acids; Selenocompound metabolism [PATH:ko00450] Metabolism; Global and overview maps; Metabolic pathways [PATH:ko01100] Metabolism; Global and overview maps; Biosynthesis of secondary metabolites [PATH:ko01110] Metabolism; Global and overview maps; Biosynthesis of amino acids…
GM000422	99.1	0	lcs:LCBD_0407
GM000423	99	0	lcw:BN194_04120
GM000424	99.7	6.6e-161	lcs:LCBD_0409	K01624	FBA, fbaA	fructose-bisphosphate aldolase, class II	4.1.2.13	Metabolism; Carbohydrate metabolism; Glycolysis / Gluconeogenesis [PATH:ko00010] Metabolism; Carbohydrate metabolism; Pentose phosphate pathway [PATH:ko00030] Metabolism; Carbohydrate metabolism; Fructose and mannose metabolism [PATH:ko00051] Metabolism; Energy metabolism; Methane metabolism [PATH:ko00680] Metabolism; Energy metabolism; Carbon fixation in photosynthetic organisms [PATH:ko00710] M…
GM000425	99.8	0	lcw:BN194_04140	K02768	PTS-Fru-EIIA, fruB	PTS system, fructose-specific IIA component	2.7.1.202	Metabolism; Carbohydrate metabolism; Fructose and mannose metabolism [PATH:ko00051] Metabolism; Global and overview maps; Metabolic pathways [PATH:ko01100] Metabolism; Global and overview maps; Microbial metabolism in diverse environments [PATH:ko01120] Environmental Information Processing; Membrane transport; Phosphotransferase system (PTS) [PATH:ko02060]
GM000426	99.6	3.9e-147	lce:LC2W_0409	K00068	srlD	sorbitol-6-phosphate 2-dehydrogenase	1.1.1.140	Metabolism; Carbohydrate metabolism; Fructose and mannose metabolism [PATH:ko00051]
GM000427	99.4	7.5e-271	lcb:LCABL_01280
GM000428	100	1.2e-58	lcb:LCABL_04120	K17464	PTS-Dga-EIIA, dgaA	PTS system, D-glucosaminate-specific IIA component	2.7.1.203	Metabolism; Carbohydrate metabolism; Pentose phosphate pathway [PATH:ko00030] Metabolism; Global and overview maps; Microbial metabolism in diverse environments [PATH:ko01120] Environmental Information Processing; Membrane transport; Phosphotransferase system (PTS) [PATH:ko02060]
GM000429	99.4	1.7e-84	lcs:LCBD_0416	K17465	PTS-Dga-EIIB, dgaB	PTS system, D-glucosaminate-specific IIB component	2.7.1.203	Metabolism; Carbohydrate metabolism; Pentose phosphate pathway [PATH:ko00030] Metabolism; Global and overview maps; Microbial metabolism in diverse environments [PATH:ko01120] Environmental Information Processing; Membrane transport; Phosphotransferase system (PTS) [PATH:ko02060]
GM000430	100	9.9e-137	lcw:BN194_04220	K17466	PTS-Dga-EIIC, dgaC	PTS system, D-glucosaminate-specific IIC component	--	Metabolism; Carbohydrate metabolism; Pentose phosphate pathway [PATH:ko00030] Metabolism; Global and overview maps; Microbial metabolism in diverse environments [PATH:ko01120] Environmental Information Processing; Membrane transport; Phosphotransferase system (PTS) [PATH:ko02060]
GM000431	100	3.4e-157	lcb:LCABL_04150	K17467	PTS-Dga-EIID, dgaD	PTS system, D-glucosaminate-specific IID component	--	Metabolism; Carbohydrate metabolism; Pentose phosphate pathway [PATH:ko00030] Metabolism; Global and overview maps; Microbial metabolism in diverse environments [PATH:ko01120] Environmental Information Processing; Membrane transport; Phosphotransferase system (PTS) [PATH:ko02060]
GM000432	100	2.1e-221	lce:LC2W_0414
GM000433	100	4.5e-114	lce:LC2W_0415	K05879	dhaL	phosphoenolpyruvate---glycerone phosphotransferase subunit DhaL	2.7.1.121	Metabolism; Lipid metabolism; Glycerolipid metabolism [PATH:ko00561] Metabolism; Global and overview maps; Metabolic pathways [PATH:ko01100]
GM000434	100	8.2e-187	lcw:BN194_04260	K05878	dhaK	phosphoenolpyruvate---glycerone phosphotransferase subunit DhaK	2.7.1.121	Metabolism; Lipid metabolism; Glycerolipid metabolism [PATH:ko00561] Metabolism; Global and overview maps; Metabolic pathways [PATH:ko01100]
GM000435	99.6	5.7e-120	lce:LC2W_0417	K08093	hxlA	3-hexulose-6-phosphate synthase	4.1.2.43	Metabolism; Carbohydrate metabolism; Pentose phosphate pathway [PATH:ko00030] Metabolism; Energy metabolism; Methane metabolism [PATH:ko00680] Metabolism; Global and overview maps; Metabolic pathways [PATH:ko01100] Metabolism; Global and overview maps; Microbial metabolism in diverse environments [PATH:ko01120] Metabolism; Global and overview maps; Carbon metabolism [PATH:ko01200] Metabolism; Glo…
GM000436	100	1.9e-100	lcw:BN194_04280	K08094	hxlB	6-phospho-3-hexuloisomerase	5.3.1.27	Metabolism; Carbohydrate metabolism; Pentose phosphate pathway [PATH:ko00030] Metabolism; Energy metabolism; Methane metabolism [PATH:ko00680] Metabolism; Global and overview maps; Metabolic pathways [PATH:ko01100] Metabolism; Global and overview maps; Microbial metabolism in diverse environments [PATH:ko01120] Metabolism; Global and overview maps; Carbon metabolism [PATH:ko01200] Metabolism; Glo…
GM000437	100	1.9e-132	lcs:LCBD_0424	K03710	K03710	GntR family transcriptional regulator	--
GM000438	99.8	2.2e-245	lcw:BN194_04300	K19956	sorE	L-sorbose 1-phosphate reductase	1.1.1.-	Metabolism; Carbohydrate metabolism; Fructose and mannose metabolism [PATH:ko00051]
GM000439	98.4	1.4e-172	lcs:LCBD_0426
GM000440	100	6.6e-147	lce:LC2W_0422	K00068	srlD	sorbitol-6-phosphate 2-dehydrogenase	1.1.1.140	Metabolism; Carbohydrate metabolism; Fructose and mannose metabolism [PATH:ko00051]
GM000441	99.3	2.2e-69	lcb:LCABL_04250	K02812	PTS-Sor-EIIA, sorF	PTS system, sorbose-specific IIA component	2.7.1.206	Metabolism; Carbohydrate metabolism; Fructose and mannose metabolism [PATH:ko00051] Environmental Information Processing; Membrane transport; Phosphotransferase system (PTS) [PATH:ko02060]
GM000442	100	1.5e-85	lcb:LCABL_04260	K02813	PTS-Sor-EIIB, sorB	PTS system, sorbose-specific IIB component	2.7.1.206	Metabolism; Carbohydrate metabolism; Fructose and mannose metabolism [PATH:ko00051] Environmental Information Processing; Membrane transport; Phosphotransferase system (PTS) [PATH:ko02060]
GM000443	100	6.6e-150	lcs:LCBD_0430	K02814	PTS-Sor-EIIC, sorA	PTS system, sorbose-specific IIC component	--	Metabolism; Carbohydrate metabolism; Fructose and mannose metabolism [PATH:ko00051] Environmental Information Processing; Membrane transport; Phosphotransferase system (PTS) [PATH:ko02060]
GM000444	98.9	4.8e-156	lce:LC2W_0426	K02815	PTS-Sor-EIID, sorM	PTS system, sorbose-specific IID component	--	Metabolism; Carbohydrate metabolism; Fructose and mannose metabolism [PATH:ko00051] Environmental Information Processing; Membrane transport; Phosphotransferase system (PTS) [PATH:ko02060]
GM000445	99.3	5.1e-164	lcb:LCABL_04290	K01624	FBA, fbaA	fructose-bisphosphate aldolase, class II	4.1.2.13	Metabolism; Carbohydrate metabolism; Glycolysis / Gluconeogenesis [PATH:ko00010] Metabolism; Carbohydrate metabolism; Pentose phosphate pathway [PATH:ko00030] Metabolism; Carbohydrate metabolism; Fructose and mannose metabolism [PATH:ko00051] Metabolism; Energy metabolism; Methane metabolism [PATH:ko00680] Metabolism; Energy metabolism; Carbon fixation in photosynthetic organisms [PATH:ko00710] M…
GM000446	99.2	7.6e-274	lcw:BN194_04380	K14445	SLC13A2_3_5	solute carrier family 13 (sodium-dependent dicarboxylate transporter), member 2/3/5	--
GM000447	99.8	1.7e-237	lcs:LCBD_0435
GM000448	99	9.8e-160	lcs:LCBD_0436
GM000449	100	3.9e-158	lcl:LOCK919_0460
GM000450	100	1.7e-100	lcx:LCA12A_2607	K16924	mtsT	energy-coupling factor transport system substrate-specific component	--
GM000451	99.6	0	lcl:LOCK919_0462	K16786	ecfA1	energy-coupling factor transport system ATP-binding protein	3.6.3.-	Environmental Information Processing; Membrane transport; ABC transporters [PATH:ko02010]
GM000452	99.6	7.8e-151	lcl:LOCK919_0463	K16785	ecfT	energy-coupling factor transport system permease protein	--	Environmental Information Processing; Membrane transport; ABC transporters [PATH:ko02010]
GM000453	96.8	3.7e-24	lcs:LCBD_0441
GM000454	99.6	0	lcw:BN194_04470
GM000455	100	9e-74	lcz:LCAZH_0402	K02744	PTS-Aga-EIIA, agaF	PTS system, N-acetylgalactosamine-specific IIA component	2.7.1.-	Metabolism; Carbohydrate metabolism; Galactose metabolism [PATH:ko00052] Environmental Information Processing; Membrane transport; Phosphotransferase system (PTS) [PATH:ko02060]
GM000456	100	1e-89	lpi:LBPG_02555
GM000457	100	5.6e-146	lpq:AF91_01110	K02795	PTS-Man-EIIC, manY	PTS system, mannose-specific IIC component	--	Metabolism; Carbohydrate metabolism; Fructose and mannose metabolism [PATH:ko00051] Metabolism; Carbohydrate metabolism; Amino sugar and nucleotide sugar metabolism [PATH:ko00520] Metabolism; Global and overview maps; Metabolic pathways [PATH:ko01100] Environmental Information Processing; Membrane transport; Phosphotransferase system (PTS) [PATH:ko02060]
GM000458	100	1.2e-159	lpi:LBPG_02557
GM000459	100	9e-58	lpi:LBPG_02558
GM000460	91.3	0	lcl:LOCK919_0471
GM000462	97.7	2.6e-117	lpap:LBPC_0346
GM000463	100	4.5e-137	lcl:LOCK919_0474	K03436	fruR2, fruR	DeoR family transcriptional regulator, fructose operon transcriptional repressor	--
GM000464	99.5	4.5e-114	lce:LC2W_0448	K08093	hxlA	3-hexulose-6-phosphate synthase	4.1.2.43	Metabolism; Carbohydrate metabolism; Pentose phosphate pathway [PATH:ko00030] Metabolism; Energy metabolism; Methane metabolism [PATH:ko00680] Metabolism; Global and overview maps; Metabolic pathways [PATH:ko01100] Metabolism; Global and overview maps; Microbial metabolism in diverse environments [PATH:ko01120] Metabolism; Global and overview maps; Carbon metabolism [PATH:ko01200] Metabolism; Glo…
GM000465	100	4.3e-100	lce:LC2W_0449	K08094	hxlB	6-phospho-3-hexuloisomerase	5.3.1.27	Metabolism; Carbohydrate metabolism; Pentose phosphate pathway [PATH:ko00030] Metabolism; Energy metabolism; Methane metabolism [PATH:ko00680] Metabolism; Global and overview maps; Metabolic pathways [PATH:ko01100] Metabolism; Global and overview maps; Microbial metabolism in diverse environments [PATH:ko01120] Metabolism; Global and overview maps; Carbon metabolism [PATH:ko01200] Metabolism; Glo…
GM000466	48.8	2.2e-62	law:LACWKB8_0174
GM000467	75.3	3e-115	law:LACWKB8_0173	K00068	srlD	sorbitol-6-phosphate 2-dehydrogenase	1.1.1.140	Metabolism; Carbohydrate metabolism; Fructose and mannose metabolism [PATH:ko00051]
GM000468	66.9	4.3e-234	ecas:ECBG_02720	K02798	PTS-Mtl-EIIA, mtlA, cmtB	PTS system, mannitol-specific IIA component	2.7.1.197	Metabolism; Carbohydrate metabolism; Fructose and mannose metabolism [PATH:ko00051] Environmental Information Processing; Membrane transport; Phosphotransferase system (PTS) [PATH:ko02060]
GM000469	66.9	1.3e-146	law:LACWKB8_0171	K00009	mtlD	mannitol-1-phosphate 5-dehydrogenase	1.1.1.17	Metabolism; Carbohydrate metabolism; Fructose and mannose metabolism [PATH:ko00051]
GM000470	60.4	1.8e-08	lrl:LC705_00471
GM000471	67	2.8e-73	lrc:LOCK908_0477
GM000472	99.8	3e-242	lcx:LCA12A_2404	K03761	kgtP	MFS transporter, MHS family, alpha-ketoglutarate permease	--
GM000473	99.4	5.2e-92	lce:LC2W_0458
GM000474	100	4.1e-18	lca:LSEI_0392
GM000475	100	2.9e-144	lpq:AF91_01205
GM000476	100	3.8e-133	lcl:LOCK919_0489
GM000477	100	2.5e-115	lpq:AF91_01215
GM000478	100	1.7e-08	lpq:AF91_01220
GM000479	99.4	1.7e-87	lpap:LBPC_0364
GM000480	100	8.1e-193	lcs:LCBD_0469	K02004	ABC.CD.P	putative ABC transport system permease protein	--
GM000481	99.6	7e-121	lcl:LOCK919_0493	K02003	ABC.CD.A	putative ABC transport system ATP-binding protein	--
GM000482	99.8	2.4e-261	lcw:BN194_04740	K05910	npr	NADH peroxidase	1.11.1.1
GM000483	97.1	2.8e-10	lpq:AF91_01255
GM000484	100	2.6e-151	lca:LSEI_0398
GM000485	100	4.1e-45	lcz:LCAZH_0433	K19157	yafQ	mRNA interferase YafQ	3.1.-.-
GM000486	100	8e-186	lcz:LCAZH_0434
GM000487	99.4	5.1e-87	lce:LC2W_0473
GM000488	100	1.3e-147	lcz:LCAZH_0436	K02795	PTS-Man-EIIC, manY	PTS system, mannose-specific IIC component	--	Metabolism; Carbohydrate metabolism; Fructose and mannose metabolism [PATH:ko00051] Metabolism; Carbohydrate metabolism; Amino sugar and nucleotide sugar metabolism [PATH:ko00520] Metabolism; Global and overview maps; Metabolic pathways [PATH:ko01100] Environmental Information Processing; Membrane transport; Phosphotransferase system (PTS) [PATH:ko02060]
GM000489	100	2.4e-161	lcw:BN194_04800	K02796	PTS-Man-EIID, manZ	PTS system, mannose-specific IID component	--	Metabolism; Carbohydrate metabolism; Fructose and mannose metabolism [PATH:ko00051] Metabolism; Carbohydrate metabolism; Amino sugar and nucleotide sugar metabolism [PATH:ko00520] Metabolism; Global and overview maps; Metabolic pathways [PATH:ko01100] Environmental Information Processing; Membrane transport; Phosphotransferase system (PTS) [PATH:ko02060]
GM000490	99.9	0	lcz:LCAZH_0438
GM000491	100	5.2e-71	lcz:LCAZH_0439	K02793	PTS-Man-EIIA, manX	PTS system, mannose-specific IIA component	2.7.1.191	Metabolism; Carbohydrate metabolism; Fructose and mannose metabolism [PATH:ko00051] Metabolism; Carbohydrate metabolism; Amino sugar and nucleotide sugar metabolism [PATH:ko00520] Metabolism; Global and overview maps; Metabolic pathways [PATH:ko01100] Environmental Information Processing; Membrane transport; Phosphotransferase system (PTS) [PATH:ko02060]
GM000492	100	0	lcx:LCA12A_2422	K01182	IMA, malL	oligo-1,6-glucosidase	3.2.1.10	Metabolism; Carbohydrate metabolism; Galactose metabolism [PATH:ko00052] Metabolism; Carbohydrate metabolism; Starch and sucrose metabolism [PATH:ko00500] Metabolism; Global and overview maps; Metabolic pathways [PATH:ko01100]
GM000493	99.8	0	lcx:LCA12A_2423	K06147	ABCB-BAC	ATP-binding cassette, subfamily B, bacterial	--
GM000494	99.7	0	lcw:BN194_04860
GM000496	100	2.6e-07	lcb:LCABL_04830
GM000497	99.8	0	lcx:LCA12A_2425	K01421	yhgE	putative membrane protein	--
GM000498	100	9.3e-28	lce:LC2W_0484
GM000499	99.3	3.4e-157	lcz:LCAZH_0446	K02073	metQ	D-methionine transport system substrate-binding protein	--	Environmental Information Processing; Membrane transport; ABC transporters [PATH:ko02010]
GM000500	99.4	1.8e-194	lce:LC2W_0486	K01442	E3.5.1.24	choloylglycine hydrolase	3.5.1.24	Metabolism; Lipid metabolism; Primary bile acid biosynthesis [PATH:ko00120] Metabolism; Lipid metabolism; Secondary bile acid biosynthesis [PATH:ko00121] Metabolism; Global and overview maps; Metabolic pathways [PATH:ko01100]
GM000501	99.7	7.5e-185	lcb:LCABL_04880
GM000502	99.6	0	lpq:AF91_01360	K10254	ohyA, sph	oleate hydratase	4.2.1.53
GM000503	100	1.2e-15	lpap:LBPC_0384
GM000504	100	3.8e-101	lca:LSEI_0418
GM000505	100	6.2e-60	lpi:LBPG_02606	K05881	dhaM	phosphoenolpyruvate---glycerone phosphotransferase subunit DhaM	2.7.1.121	Metabolism; Lipid metabolism; Glycerolipid metabolism [PATH:ko00561] Metabolism; Global and overview maps; Metabolic pathways [PATH:ko01100]
GM000506	100	1.5e-103	lcs:LCBD_0490	K05879	dhaL	phosphoenolpyruvate---glycerone phosphotransferase subunit DhaL	2.7.1.121	Metabolism; Lipid metabolism; Glycerolipid metabolism [PATH:ko00561] Metabolism; Global and overview maps; Metabolic pathways [PATH:ko01100]
GM000507	100	6.1e-190	lpap:LBPC_0388	K05878	dhaK	phosphoenolpyruvate---glycerone phosphotransferase subunit DhaK	2.7.1.121	Metabolism; Lipid metabolism; Glycerolipid metabolism [PATH:ko00561] Metabolism; Global and overview maps; Metabolic pathways [PATH:ko01100]
GM000508	100	1.9e-17	lca:LSEI_0422
GM000509	100	6.5e-77	lcl:LOCK919_0518
GM000510	99.4	9.2e-272	lpq:AF91_01400
GM000511	99	9.7e-48	lcz:LCAZH_0460
GM000512	98.4	5.8e-202	lcs:LCBD_0496
GM000513	99.5	5.3e-115	lcz:LCAZH_0462
GM000514	100	2.1e-107	lcx:LCA12A_2443	K01246	tag	DNA-3-methyladenine glycosylase I	3.2.2.20	Genetic Information Processing; Replication and repair; Base excision repair [PATH:ko03410]
GM000515	100	2.4e-166	lpap:LBPC_0398	K01624	FBA, fbaA	fructose-bisphosphate aldolase, class II	4.1.2.13	Metabolism; Carbohydrate metabolism; Glycolysis / Gluconeogenesis [PATH:ko00010] Metabolism; Carbohydrate metabolism; Pentose phosphate pathway [PATH:ko00030] Metabolism; Carbohydrate metabolism; Fructose and mannose metabolism [PATH:ko00051] Metabolism; Energy metabolism; Methane metabolism [PATH:ko00680] Metabolism; Energy metabolism; Carbon fixation in photosynthetic organisms [PATH:ko00710] M…
GM000516	100	0	lcw:BN194_05070	K00158	E1.2.3.3, poxL	pyruvate oxidase	1.2.3.3	Metabolism; Carbohydrate metabolism; Pyruvate metabolism [PATH:ko00620] Metabolism; Global and overview maps; Metabolic pathways [PATH:ko01100]
GM000517	99.4	5.7e-196	lcx:LCA12A_2446
GM000518	100	4.4e-199	lpap:LBPC_0402	K19802	ycjG, ykfB	L-Ala-D/L-Glu epimerase	5.1.1.20
GM000519	100	1.6e-133	lpi:LBPG_02622
GM000520	99.2	1.3e-141	lca:LSEI_0438	K07010	K07010	putative glutamine amidotransferase	--
GM000521	100	3.8e-256	lpq:AF91_01450	K01915	glnA, GLUL	glutamine synthetase	6.3.1.2	Metabolism; Amino acid metabolism; Arginine biosynthesis [PATH:ko00220] Metabolism; Amino acid metabolism; Alanine, aspartate and glutamate metabolism [PATH:ko00250] Metabolism; Carbohydrate metabolism; Glyoxylate and dicarboxylate metabolism [PATH:ko00630] Metabolism; Energy metabolism; Nitrogen metabolism [PATH:ko00910] Metabolism; Global and overview maps; Metabolic pathways [PATH:ko01100] Met…
GM000522	99.2	1.8e-219	lcw:BN194_05130	K07045	K07045	uncharacterized protein	--
GM000523	100	5.9e-246	lcl:LOCK919_0534
GM000524	100	1e-74	lpq:AF91_01465
GM000525	98.4	4.9e-181	lcw:BN194_05160
GM000527	99.6	1.9e-288	lpq:AF91_01510	K03491	licR	lichenan operon transcriptional antiterminator	--
GM000528	100	2e-105	lcz:LCAZH_0483
GM000529	99.3	0	lca:LSEI_0455
GM000530	100	4.2e-129	lcx:LCA12A_2819
GM000531	99.7	1.5e-188	lcs:LCBD_0520
GM000532	98	6.2e-201	lcl:LOCK919_0549	K07284	srtA	sortase A	3.4.22.70
GM000533	100	3.2e-132	lca:LSEI_0458	K01990	ABC-2.A	ABC-2 type transport system ATP-binding protein	--
GM000534	99.4	0	lpq:AF91_01545
GM000536	99	6.4e-113	lca:LSEI_0460
GM000537	99.5	4.5e-210	lcs:LCBD_0525
GM000538	99	4.5e-157	lpap:LBPC_0429
GM000539	98.2	8.4e-212	lca:LSEI_0463
GM000540	97.8	1.1e-92	lcb:LCABL_05310
GM000541	95.9	0	lca:LSEI_0465
GM000542	97.7	0	lpi:LBPG_02646
GM000543	95.1	0	lcw:BN194_05400
GM000544	99.6	0	lpap:LBPC_0434	K01256	pepN	aminopeptidase N	3.4.11.2	Metabolism; Metabolism of other amino acids; Glutathione metabolism [PATH:ko00480] Metabolism; Global and overview maps; Metabolic pathways [PATH:ko01100]
GM000545	99.8	2.6e-279	lce:LC2W_0535
GM000546	100	1e-92	lcl:LOCK919_0561	K08996	yagU	putative membrane protein	--
GM000547	100	1.4e-166	lca:LSEI_0473
GM000548	100	5.6e-168	lcl:LOCK919_0563
GM000549	100	4e-155	lcl:LOCK919_0564
GM000550	99.7	2e-163	lcs:LCBD_0541	K00014	aroE	shikimate dehydrogenase	1.1.1.25	Metabolism; Amino acid metabolism; Phenylalanine, tyrosine and tryptophan biosynthesis [PATH:ko00400] Metabolism; Global and overview maps; Metabolic pathways [PATH:ko01100] Metabolism; Global and overview maps; Biosynthesis of secondary metabolites [PATH:ko01110] Metabolism; Global and overview maps; Biosynthesis of antibiotics [PATH:ko01130] Metabolism; Global and overview maps; Biosynthesis of…
GM000551	99.8	7.3e-222	lca:LSEI_0477
GM000552	99	1.4e-166	lca:LSEI_0478	K00014	aroE	shikimate dehydrogenase	1.1.1.25	Metabolism; Amino acid metabolism; Phenylalanine, tyrosine and tryptophan biosynthesis [PATH:ko00400] Metabolism; Global and overview maps; Metabolic pathways [PATH:ko01100] Metabolism; Global and overview maps; Biosynthesis of secondary metabolites [PATH:ko01110] Metabolism; Global and overview maps; Biosynthesis of antibiotics [PATH:ko01130] Metabolism; Global and overview maps; Biosynthesis of…
GM000553	99.6	6.2e-161	lpap:LBPC_0445	K00651	metA	homoserine O-succinyltransferase/O-acetyltransferase	2.3.1.46 2.3.1.31	Metabolism; Amino acid metabolism; Cysteine and methionine metabolism [PATH:ko00270] Metabolism; Energy metabolism; Sulfur metabolism [PATH:ko00920] Metabolism; Global and overview maps; Metabolic pathways [PATH:ko01100] Metabolism; Global and overview maps; Biosynthesis of secondary metabolites [PATH:ko01110] Metabolism; Global and overview maps; Biosynthesis of antibiotics [PATH:ko01130] Metabo…
GM000554	100	1.1e-172	lcl:LOCK919_0570	K01738	cysK	cysteine synthase	2.5.1.47	Metabolism; Amino acid metabolism; Cysteine and methionine metabolism [PATH:ko00270] Metabolism; Energy metabolism; Sulfur metabolism [PATH:ko00920] Metabolism; Global and overview maps; Metabolic pathways [PATH:ko01100] Metabolism; Global and overview maps; Biosynthesis of secondary metabolites [PATH:ko01110] Metabolism; Global and overview maps; Microbial metabolism in diverse environments [PAT…
GM000555	98.5	3.9e-68	lpq:AF91_01640
GM000556	100	9.7e-224	lpq:AF91_01650
GM000557	98.8	7.8e-41	lcb:LCABL_05490
GM000558	100	1.5e-125	lrh:LGG_00464
GM000559	100	4.4e-114	lca:LSEI_0488
GM000560	100	4.9e-26	lca:LSEI_0489
GM000561	100	1.7e-10	lce:LC2W_0553
GM000562	98.7	3.1e-132	lca:LSEI_0491
GM000563	100	2.6e-78	lcw:BN194_05590
GM000564	100	4e-39	lca:LSEI_0493
GM000565	100	8.2e-40	lcl:LOCK919_0580
GM000566	100	3.8e-27	lcl:LOCK919_0581
GM000567	99.6	2.4e-155	lpap:LBPC_0456
GM000568	100	1.6e-142	lce:LC2W_0560
GM000569	100	5.4e-25	lcl:LOCK919_0584
GM000570	98.8	6.2e-43	lcb:LCABL_05600
GM000571	99.2	1.7e-62	lcl:LOCK919_0586
GM000572	100	8.5e-11	lcs:LCBD_0563
GM000573	98.5	2.6e-28	lcb:LCABL_05620
GM000574	100	3.3e-61	lcs:LCBD_0565
GM000575	99	1.3e-53	lcs:LCBD_0567
GM000576	99.6	1.9e-140	lcl:LOCK919_0590
GM000577	100	1.1e-155	lca:LSEI_0508	K02315	dnaC	DNA replication protein DnaC	--
GM000578	100	2.5e-94	lcs:LCBD_0570
GM000579	100	1.6e-72	lcl:LOCK919_0592
GM000580	100	2.2e-133	lce:LC2W_0572
GM000581	100	4.1e-51	lce:LC2W_0573
GM000582	99.1	4e-54	lcw:BN194_05770
GM000583	99.3	9.6e-79	lcb:LCABL_05720
GM000584	99.5	1.8e-118	lcw:BN194_05790
GM000585	99.6	1.1e-155	lcs:LCBD_1858
GM000586	100	9.5e-32	lca:LSEI_0517
GM000587	97.8	4.1e-183	lrl:LC705_00866
GM000588	100	5.5e-34	lcb:LCABL_05770
GM000589	100	8.2e-59	lca:LSEI_0520
GM000590	100	5.3e-52	lcw:BN194_05860
GM000591	100	5.6e-137	lcs:LCBD_2912
GM000592	100	3.9e-169	lcw:BN194_12290
GM000593	99.6	1.2e-156	lce:LC2W_0585
GM000594	100	4.3e-45	lcs:LCBD_p19
GM000595	100	5e-43	lcw:BN194_P0180
GM000596	82.3	6.8e-244	lcw:BN194_P0170
GM000597	99.4	9.8e-82	lcw:BN194_P0160
GM000598	95.9	0	lcw:BN194_P0150	K03205	virD4, lvhD4	type IV secretion system protein VirD4	--	Environmental Information Processing; Membrane transport; Bacterial secretion system [PATH:ko03070]
GM000599	100	3.8e-30	lcs:LCBD_p14
GM000600	99.3	6.2e-148	lpq:AF91_15540
GM000601	95.1	1.5e-61	lpq:AF91_15545
GM000602	99.6	0	lcw:BN194_P0120
GM000603	97.9	0	lcw:BN194_P0110
GM000604	97.1	3e-92	lcs:LCBD_p10
GM000605	98.7	4.1e-33	lpap:LBPC_0477
GM000606	82.9	8.7e-180	lpap:LBPC_0478
GM000607	98.5	1.2e-182	lcw:BN194_P0070
GM000609	100	7.2e-45	lpap:LBPC_0480
GM000610	93.2	1.6e-64	lpi:LBPG_04245
GM000611	99.9	0	lpap:LBPC_0481
GM000612	100	7.4e-271	lpap:LBPC_0482
GM000613	98.7	2.2e-81	lpap:LBPC_0488
GM000615	99.6	7.6e-137	lpap:LBPC_0487
GM000616	99.4	5.6e-310	lpap:LBPC_0486	K02790	PTS-MalGlc-EIIB, malX	PTS system, maltose/glucose-specific IIB component	2.7.1.199 2.7.1.208	Metabolism; Carbohydrate metabolism; Glycolysis / Gluconeogenesis [PATH:ko00010] Metabolism; Carbohydrate metabolism; Starch and sucrose metabolism [PATH:ko00500] Metabolism; Carbohydrate metabolism; Amino sugar and nucleotide sugar metabolism [PATH:ko00520] Environmental Information Processing; Membrane transport; Phosphotransferase system (PTS) [PATH:ko02060]
GM000617	100	1e-144	lpap:LBPC_0485
GM000618	99.4	1.4e-81	lpap:LBPC_0484
GM000619	99.4	3.3e-82	lpap:LBPC_0483
GM000620	98.9	3.6e-93	lpap:LBPC_0489
GM000621	100	2.2e-181	lpap:LBPC_0490	K00018	hprA	glycerate dehydrogenase	1.1.1.29	Metabolism; Amino acid metabolism; Glycine, serine and threonine metabolism [PATH:ko00260] Metabolism; Carbohydrate metabolism; Glyoxylate and dicarboxylate metabolism [PATH:ko00630] Metabolism; Energy metabolism; Methane metabolism [PATH:ko00680] Metabolism; Global and overview maps; Metabolic pathways [PATH:ko01100] Metabolism; Global and overview maps; Biosynthesis of secondary metabolites [PA…
GM000622	99.2	5e-68	lpap:LBPC_0491
GM000623	100	3.4e-38	pce:PECL_1962
GM000624	100	1e-253	lpap:LBPC_0493	K03502	umuC	DNA polymerase V	--
GM000625	97.2	4e-36	pce:PECL_2031
GM000626	100	2.2e-242	lpap:LBPC_0494	K01154	hsdS	type I restriction enzyme, S subunit	3.1.21.3
GM000627	99.8	1.6e-311	lpap:LBPC_0495	K03427	hsdM	type I restriction enzyme M protein	2.1.1.72
GM000628	100	0	lpap:LBPC_0496	K01153	hsdR	type I restriction enzyme, R subunit	3.1.21.3
GM000629	100	1.1e-169	lpap:LBPC_0497
GM000630	100	3.8e-22	lpap:LBPC_0498
GM000631	99.3	3.1e-152	lpap:LBPC_0499
GM000632	100	3.6e-136	lpap:LBPC_0500
GM000633	91.7	1.2e-100	lpar:FAM21731_02676
GM000634	48.5	1.5e-87	spet:CEP67_07635
GM000636	98.8	9.2e-39	lpar:FAM21731_02655
GM000637	99.6	1e-158	lbn:LBUCD034_p0039
GM000638	99.3	1.1e-74	lpq:AF91_01830	K07483	K07483	transposase	--
GM000639	97.7	2.8e-41	lrh:LGG_00455
GM000640	100	0	lrg:LRHM_0440	K01537	E3.6.3.8	Ca2+-transporting ATPase	3.6.3.8
GM000641	99.1	2.5e-57	lrl:LC705_p00042
GM000642	96.8	4.5e-79	lcb:LCABL_06190
GM000643	92	6.8e-19	pce:PECL_1981
GM000644	98.5	4.1e-106	lpd:AYR62_16355
GM000645	100	1.2e-44	lbh:Lbuc_2452	K19159	yefM	antitoxin YefM	--
GM000646	99.2	2.8e-60	lbh:Lbuc_2453	K19157	yafQ	mRNA interferase YafQ	3.1.-.-
GM000647	93.9	3e-09	pce:PECL_1975
GM000648	99.4	7.5e-271	lcs:LCBD_0129
GM000649	100	2.1e-84	lpr:LBP_cg2552	K04047	dps	starvation-inducible DNA-binding protein	--
GM000650	99.6	2.9e-133	lpt:zj316_2659	K01990	ABC-2.A	ABC-2 type transport system ATP-binding protein	--
GM000651	99.8	1.2e-224	lcn:C270_08036	K01992	ABC-2.P	ABC-2 type transport system permease protein	--
GM000652	99.1	1.6e-117	lcn:C270_08031
GM000653	99.6	1.3e-125	lpz:Lp16_2185	K00763	pncB, NAPRT1	nicotinate phosphoribosyltransferase	6.3.4.21	Metabolism; Metabolism of cofactors and vitamins; Nicotinate and nicotinamide metabolism [PATH:ko00760] Metabolism; Global and overview maps; Metabolic pathways [PATH:ko01100]
GM000656	100	4.8e-107	lrg:LRHM_0429
GM000657	100	7.8e-99	pio:PI20285_10855
GM000658	100	2.8e-23	lpq:AF91_01700
GM000659	99.8	0	lpq:AF91_01695	K01534	zntA	Cd2+/Zn2+-exporting ATPase	3.6.3.3 3.6.3.5
GM000661	100	2.4e-43	lpap:LBPC_0503
GM000662	99.4	3.3e-82	lpap:LBPC_0170
GM000663	99.2	1.5e-61	pio:PI20285_11155
GM000664	93.4	0	lcy:LC20004_14225	K01533	copB	Cu2+-exporting ATPase	3.6.3.4
GM000665	97.7	2e-39	lpr:LBP_p4g001	K08217	mef	MFS transporter, DHA3 family, macrolide efflux protein	--
GM000666	99.1	5e-53	lpi:LBPG_04235
GM000667	99.2	9.3e-283	lpap:LBPC_2576	K05845	opuC	osmoprotectant transport system substrate-binding protein	--	Environmental Information Processing; Membrane transport; ABC transporters [PATH:ko02010]
GM000668	100	1.3e-170	lpq:AF91_13035	K05847	opuA	osmoprotectant transport system ATP-binding protein	--	Environmental Information Processing; Membrane transport; ABC transporters [PATH:ko02010]
GM000669	77.3	4e-152	lca:LSEI_0395	K02004	ABC.CD.P	putative ABC transport system permease protein	--
GM000670	80.2	1.1e-94	lca:LSEI_0396	K02003	ABC.CD.A	putative ABC transport system ATP-binding protein	--
GM000671	99.6	1e-127	lki:LKI_10491	K07498	K07498	putative transposase	--
GM000672	100	4.9e-64	lpq:AF91_01790
GM000673	100	1.5e-125	lpap:LBPC_0339
GM000674	99.8	2e-271	lcb:LCABL_00530
GM000675	99.4	0	lcl:LOCK919_p23	K00525	E1.17.4.1A, nrdA, nrdE	ribonucleoside-diphosphate reductase alpha chain	1.17.4.1	Metabolism; Nucleotide metabolism; Purine metabolism [PATH:ko00230] Metabolism; Nucleotide metabolism; Pyrimidine metabolism [PATH:ko00240] Metabolism; Global and overview maps; Metabolic pathways [PATH:ko01100]
GM000676	99.1	9.8e-193	lcl:LOCK919_p22	K00526	E1.17.4.1B, nrdB, nrdF	ribonucleoside-diphosphate reductase beta chain	1.17.4.1	Metabolism; Nucleotide metabolism; Purine metabolism [PATH:ko00230] Metabolism; Nucleotide metabolism; Pyrimidine metabolism [PATH:ko00240] Metabolism; Global and overview maps; Metabolic pathways [PATH:ko01100]
GM000677	100	3.5e-87	lcl:LOCK919_p21	K03647	nrdI	protein involved in ribonucleotide reduction	--
GM000680	73.4	2.1e-26	lho:LOOC260_108420	K07473	dinJ	DNA-damage-inducible protein J	--
GM000681	86.2	7.9e-39	thl:TEH_05120
GM000682	58.2	8e-37	lct:BI355_0671
GM000683	98.1	1.7e-201	lfe:LAF_0685
GM000684	98.9	3.2e-269	lfr:LC40_0460
GM000685	99.6	2.9e-127	lcw:BN194_21000	K07498	K07498	putative transposase	--
GM000686	99.8	0	lca:LSEI_0349	K07012	cas3	CRISPR-associated endonuclease/helicase Cas3	3.1.-.- 3.6.4.-
GM000687	99.8	0	lca:LSEI_0350	K19123	casA, cse1	CRISPR system Cascade subunit CasA	--
GM000688	99.5	2e-108	lca:LSEI_0351	K19046	casB, cse2	CRISPR system Cascade subunit CasB	--
GM000689	99.7	2.4e-200	lca:LSEI_0352	K19124	casC, cse4	CRISPR system Cascade subunit CasC	--
GM000690	99.6	1.1e-129	lca:LSEI_0353	K19125	casD, cse5	CRISPR system Cascade subunit CasD	--
GM000691	99.1	1.5e-117	lca:LSEI_0354	K19126	casE, cse3	CRISPR system Cascade subunit CasE	--
GM000692	99.4	7e-172	lca:LSEI_0355	K15342	cas1	CRISP-associated protein Cas1	--
GM000693	99.3	7.9e-165	lca:LSEI_0356	K09951	cas2	CRISPR-associated protein Cas2	--
GM000697	100	7.6e-128	lki:LKI_10491	K07498	K07498	putative transposase	--
GM000698	99.3	1.1e-255	lca:LSEI_0578
GM000699	100	1.8e-103	lpi:LBPG_02282
GM000700	98.8	2.9e-38	lpq:AF91_01960
GM000701	98.1	4.8e-81	lce:LC2W_0629
GM000702	99.2	9e-65	lpap:LBPC_0509
GM000703	100	3e-42	lca:LSEI_0588
GM000704	100	4.8e-84	lpap:LBPC_0514
GM000705	100	1.5e-125	lpap:LBPC_2811
GM000706	100	3.2e-39	lpar:FAM21731_02655
GM000707	61.5	1.6e-47	lpg:BB562_16005	K02777	PTS-Glc-EIIA, crr	PTS system, sugar-specific IIA component	2.7.1.-	Metabolism; Carbohydrate metabolism; Glycolysis / Gluconeogenesis [PATH:ko00010] Metabolism; Carbohydrate metabolism; Starch and sucrose metabolism [PATH:ko00500] Metabolism; Carbohydrate metabolism; Amino sugar and nucleotide sugar metabolism [PATH:ko00520] Cellular Processes; Cellular community - prokaryotes; Biofilm formation - Escherichia coli [PATH:ko02026] Environmental Information Processi…
GM000708	95	1.9e-46	lcw:BN194_05860
GM000709	100	3.9e-169	lcw:BN194_12290
GM000710	100	5.6e-137	lcs:LCBD_2912
GM000711	99.6	1.2e-156	lce:LC2W_0585
GM000712	99.1	1.8e-186	lca:LSEI_0599
GM000714	96.9	7.9e-145	lcs:LCBD_0662
GM000715	98.7	3e-209	lca:LSEI_0600	K01760	metC	cysteine-S-conjugate beta-lyase	4.4.1.13	Metabolism; Amino acid metabolism; Cysteine and methionine metabolism [PATH:ko00270] Metabolism; Metabolism of other amino acids; Selenocompound metabolism [PATH:ko00450] Metabolism; Global and overview maps; Metabolic pathways [PATH:ko01100] Metabolism; Global and overview maps; Biosynthesis of secondary metabolites [PATH:ko01110] Metabolism; Global and overview maps; Biosynthesis of amino acids…
GM000716	99.3	1.5e-146	lcs:LCBD_0664	K02424	fliY	cystine transport system substrate-binding protein	--	Environmental Information Processing; Membrane transport; ABC transporters [PATH:ko02010]
GM000717	100	2.3e-127	lca:LSEI_0602	K10009	ABC.CYST.P	cystine transport system permease protein	--	Environmental Information Processing; Membrane transport; ABC transporters [PATH:ko02010]
GM000718	99	1.3e-162	lcx:LCA12A_2487
GM000719	99.8	4.1e-261	lca:LSEI_0604	K03311	TC.LIVCS	branched-chain amino acid:cation transporter, LIVCS family	--
GM000720	95	1.3e-13	lcs:LCBD_0669
GM000721	99.5	7.5e-120	lcs:LCBD_0670
GM000722	98.5	2.6e-188	lca:LSEI_0606
GM000723	99.1	5e-59	lca:LSEI_0607
GM000724	98.4	0	lcb:LCABL_06710
GM000725	97.4	3.7e-11	lpq:AF91_02060
GM000726	100	6.7e-124	lcw:BN194_06790
GM000727	98.3	2.1e-60	lpq:AF91_02075
GM000728	99.1	3.5e-128	lcs:LCBD_0677
GM000729	87.6	0	lcw:BN194_06820
GM000730	99.4	4.4e-188	lcw:BN194_06830
GM000731	99.3	0	lcz:LCAZH_0532
GM000732	100	1.4e-144	lca:LSEI_0620	K01990	ABC-2.A	ABC-2 type transport system ATP-binding protein	--
GM000733	100	1.7e-93	lcb:LCABL_06800
GM000734	98.5	4.2e-149	lcw:BN194_06870	K00868	pdxK, pdxY	pyridoxine kinase	2.7.1.35	Metabolism; Metabolism of cofactors and vitamins; Vitamin B6 metabolism [PATH:ko00750] Metabolism; Global and overview maps; Metabolic pathways [PATH:ko01100]
GM000735	100	3.8e-164	lpi:LBPG_02683	K00297	metF, MTHFR	methylenetetrahydrofolate reductase (NADPH)	1.5.1.20	Metabolism; Metabolism of cofactors and vitamins; One carbon pool by folate [PATH:ko00670] Metabolism; Energy metabolism; Carbon fixation pathways in prokaryotes [PATH:ko00720] Metabolism; Global and overview maps; Metabolic pathways [PATH:ko01100] Metabolism; Global and overview maps; Microbial metabolism in diverse environments [PATH:ko01120] Metabolism; Global and overview maps; Carbon metabol…
GM000736	99.3	0	lcl:LOCK919_0709	K00549	metE	5-methyltetrahydropteroyltriglutamate--homocysteine methyltransferase	2.1.1.14	Metabolism; Amino acid metabolism; Cysteine and methionine metabolism [PATH:ko00270] Metabolism; Metabolism of other amino acids; Selenocompound metabolism [PATH:ko00450] Metabolism; Global and overview maps; Metabolic pathways [PATH:ko01100] Metabolism; Global and overview maps; Biosynthesis of secondary metabolites [PATH:ko01110] Metabolism; Global and overview maps; Biosynthesis of amino acids…
GM000737	100	0	lcb:LCABL_06850	K18891	patA, rscA, lmrC, satA	ATP-binding cassette, subfamily B, multidrug efflux pump	--	Environmental Information Processing; Membrane transport; ABC transporters [PATH:ko02010]
GM000738	100	0	lcb:LCABL_06860	K18892	patB, rscB, lmrC, satB	ATP-binding cassette, subfamily B, multidrug efflux pump	--	Environmental Information Processing; Membrane transport; ABC transporters [PATH:ko02010]
GM000739	100	1.5e-230	lcb:LCABL_06870	K08177	oxlT	MFS transporter, OFA family, oxalate/formate antiporter	--
GM000740	98.8	1.6e-134	lce:LC2W_0693	K03486	treR2, treR	GntR family transcriptional regulator, trehalose operon transcriptional repressor	--
GM000741	99.5	0	lpap:LBPC_0544	K01226	treC	trehalose-6-phosphate hydrolase	3.2.1.93	Metabolism; Carbohydrate metabolism; Starch and sucrose metabolism [PATH:ko00500]
GM000742	99.6	0	lcz:LCAZH_0551	K02755	PTS-Bgl-EIIA, bglF, bglP	PTS system, beta-glucoside-specific IIA component	2.7.1.-	Environmental Information Processing; Membrane transport; Phosphotransferase system (PTS) [PATH:ko02060]
GM000743	100	2.8e-235	lca:LSEI_0632	K07862	sstT	serine/threonine transporter	--
GM000744	99.8	2.1e-276	lca:LSEI_0633	K03294	TC.APA	basic amino acid/polyamine antiporter, APA family	--
GM000745	100	2.8e-173	lcl:LOCK919_0725	K00016	LDH, ldh	L-lactate dehydrogenase	1.1.1.27	Metabolism; Carbohydrate metabolism; Glycolysis / Gluconeogenesis [PATH:ko00010] Metabolism; Amino acid metabolism; Cysteine and methionine metabolism [PATH:ko00270] Metabolism; Carbohydrate metabolism; Pyruvate metabolism [PATH:ko00620] Metabolism; Carbohydrate metabolism; Propanoate metabolism [PATH:ko00640] Metabolism; Global and overview maps; Metabolic pathways [PATH:ko01100] Metabolism; Glo…
GM000746	99.8	3.9e-253	lcw:BN194_06980	K00262	E1.4.1.4, gdhA	glutamate dehydrogenase (NADP+)	1.4.1.4	Metabolism; Amino acid metabolism; Arginine biosynthesis [PATH:ko00220] Metabolism; Amino acid metabolism; Alanine, aspartate and glutamate metabolism [PATH:ko00250] Metabolism; Energy metabolism; Nitrogen metabolism [PATH:ko00910] Metabolism; Global and overview maps; Metabolic pathways [PATH:ko01100] Metabolism; Global and overview maps; Microbial metabolism in diverse environments [PATH:ko0112…
GM000747	100	4.3e-31	lra:LRHK_605	K03704	cspA	cold shock protein (beta-ribbon, CspA family)	--
GM000748	97.2	6.5e-72	lca:LSEI_0637
GM000749	100	4.8e-78	lcw:BN194_07010
GM000750	99.2	1.3e-281	lpi:LBPG_02699	K19350	lsa	lincosamide and streptogramin A transport system ATP-binding/permease protein	--	Environmental Information Processing; Membrane transport; ABC transporters [PATH:ko02010]
GM000752	100	2.6e-114	lcw:BN194_07030
GM000753	100	1.8e-158	lcx:LCA12A_2638
GM000754	99.8	7.4e-263	lcb:LCABL_07020	K03293	TC.AAT	amino acid transporter, AAT family	--
GM000756	99.6	0	lcx:LCA12A_2640
GM000757	99.7	0	lcb:LCABL_07040	K03316	TC.CPA1	monovalent cation:H+ antiporter, CPA1 family	--
GM000758	100	3.1e-68	lcl:LOCK919_0738
GM000759	100	2.2e-75	lcx:LCA12A_2643
GM000760	100	2.7e-112	lce:LC2W_0709	K11051	ABC-2.CYL.P, cylB	multidrug/hemolysin transport system permease protein	--	Environmental Information Processing; Membrane transport; ABC transporters [PATH:ko02010]
GM000761	99.3	4.3e-163	lca:LSEI_0648	K11050	ABC-2.CYL.A, cylA	multidrug/hemolysin transport system ATP-binding protein	--	Environmental Information Processing; Membrane transport; ABC transporters [PATH:ko02010]
GM000762	99.6	3.2e-146	lcz:LCAZH_0572
GM000763	99.5	2.7e-125	lca:LSEI_0650	K01674	cah	carbonic anhydrase	4.2.1.1	Metabolism; Energy metabolism; Nitrogen metabolism [PATH:ko00910]
GM000764	100	1.9e-52	lcs:LCBD_0715
GM000765	99.3	2.7e-165	lcl:LOCK919_0745
GM000766	99.3	4e-261	lcw:BN194_07160	K03320	amt, AMT, MEP	ammonium transporter, Amt family	--
GM000767	100	1.2e-179	lpi:LBPG_02714	K07223	yfeX	porphyrinogen peroxidase	1.11.1.-
GM000768	99.5	2.2e-119	lcw:BN194_07180	K07507	mgtC	putative Mg2+ transporter-C (MgtC) family protein	--
GM000769	98.9	7.4e-154	lpap:LBPC_0571	K15051	endA	DNA-entry nuclease	--
GM000771	73.4	1.7e-19	lpi:LBPG_01610
GM000772	100	5.5e-153	lcx:LCA12A_2655	K01992	ABC-2.P	ABC-2 type transport system permease protein	--
GM000773	100	3.2e-109	lcx:LCA12A_1686	K01990	ABC-2.A	ABC-2 type transport system ATP-binding protein	--
GM000774	100	2.7e-43	lcx:LCA12A_1687
GM000777	100	2.2e-14	lcx:LCA12A_1688
GM000778	99.8	0	lcz:LCAZH_0589
GM000779	99.6	0	lcx:LCA12A_1690
GM000780	99	7.2e-111	lcx:LCA12A_1691
GM000781	100	2.8e-133	lpap:LBPC_0576	K02440	GLPF	glycerol uptake facilitator protein	--
GM000782	100	0	lca:LSEI_0661	K00111	glpA, glpD	glycerol-3-phosphate dehydrogenase	1.1.5.3	Metabolism; Lipid metabolism; Glycerophospholipid metabolism [PATH:ko00564] Metabolism; Global and overview maps; Biosynthesis of secondary metabolites [PATH:ko01110]
GM000783	99.8	2e-293	lcs:LCBD_0729	K00864	glpK, GK	glycerol kinase	2.7.1.30	Metabolism; Lipid metabolism; Glycerolipid metabolism [PATH:ko00561] Metabolism; Global and overview maps; Metabolic pathways [PATH:ko01100] Organismal Systems; Endocrine system; PPAR signaling pathway [PATH:ko03320] Organismal Systems; Environmental adaptation; Plant-pathogen interaction [PATH:ko04626]
GM000784	97.2	7.3e-140	lpap:LBPC_0579
GM000785	99.7	2e-221	lcx:LCA12A_1696	K00849	galK	galactokinase	2.7.1.6	Metabolism; Carbohydrate metabolism; Galactose metabolism [PATH:ko00052] Metabolism; Carbohydrate metabolism; Amino sugar and nucleotide sugar metabolism [PATH:ko00520] Metabolism; Global and overview maps; Metabolic pathways [PATH:ko01100]
GM000786	100	6.4e-192	lcx:LCA12A_1697	K01784	galE, GALE	UDP-glucose 4-epimerase	5.1.3.2	Metabolism; Carbohydrate metabolism; Galactose metabolism [PATH:ko00052] Metabolism; Carbohydrate metabolism; Amino sugar and nucleotide sugar metabolism [PATH:ko00520] Metabolism; Global and overview maps; Metabolic pathways [PATH:ko01100]
GM000787	99.6	6.8e-283	lpi:LBPG_02732	K00965	galT, GALT	UDPglucose--hexose-1-phosphate uridylyltransferase	2.7.7.12	Metabolism; Carbohydrate metabolism; Galactose metabolism [PATH:ko00052] Metabolism; Carbohydrate metabolism; Amino sugar and nucleotide sugar metabolism [PATH:ko00520] Metabolism; Global and overview maps; Metabolic pathways [PATH:ko01100] Organismal Systems; Endocrine system; Prolactin signaling pathway [PATH:ko04917]
GM000788	99.7	7.7e-185	lcx:LCA12A_1699	K02529	lacI, galR	LacI family transcriptional regulator	--
GM000789	98.5	3.3e-196	lcw:BN194_07390	K01785	galM, GALM	aldose 1-epimerase	5.1.3.3	Metabolism; Carbohydrate metabolism; Glycolysis / Gluconeogenesis [PATH:ko00010] Metabolism; Carbohydrate metabolism; Galactose metabolism [PATH:ko00052] Metabolism; Global and overview maps; Metabolic pathways [PATH:ko01100] Metabolism; Global and overview maps; Biosynthesis of secondary metabolites [PATH:ko01110] Metabolism; Global and overview maps; Microbial metabolism in diverse environments…
GM000790	99.2	1.4e-137	lpq:AF91_02380
GM000791	97.5	6.9e-135	lca:LSEI_0670
GM000792	91.5	1.2e-79	lcw:BN194_07420	K20112	PTS-Gal-EIIA	PTS system, galactose-specific IIA component	2.7.1.204	Environmental Information Processing; Membrane transport; Phosphotransferase system (PTS) [PATH:ko02060]
GM000793	99	2.2e-50	lpq:AF91_02395	K20113	PTS-Gal-EIIB	PTS system, galactose-specific IIB component	2.7.1.204	Environmental Information Processing; Membrane transport; Phosphotransferase system (PTS) [PATH:ko02060]
GM000794	99.2	2e-274	lcs:LCBD_0744	K20114	PTS-Gal-EIIC	PTS system, galactose-specific IIC component	--	Environmental Information Processing; Membrane transport; Phosphotransferase system (PTS) [PATH:ko02060]
GM000795	99.1	2.7e-125	lca:LSEI_0676
GM000796	99.7	3.6e-176	lpap:LBPC_0597	K00917	lacC	tagatose 6-phosphate kinase	2.7.1.144	Metabolism; Carbohydrate metabolism; Galactose metabolism [PATH:ko00052] Metabolism; Global and overview maps; Metabolic pathways [PATH:ko01100]
GM000797	99.4	8.1e-187	lpap:LBPC_0598	K01635	lacD	tagatose 1,6-diphosphate aldolase	4.1.2.40	Metabolism; Carbohydrate metabolism; Galactose metabolism [PATH:ko00052] Metabolism; Global and overview maps; Metabolic pathways [PATH:ko01100] Cellular Processes; Cellular community - prokaryotes; Quorum sensing [PATH:ko02024]
GM000798	99.4	8.4e-95	lpi:LBPG_02744	K01819	E5.3.1.26, lacA, lacB	galactose-6-phosphate isomerase	5.3.1.26	Metabolism; Carbohydrate metabolism; Galactose metabolism [PATH:ko00052] Metabolism; Global and overview maps; Metabolic pathways [PATH:ko01100]
GM000799	99.3	2e-73	lpap:LBPC_0600	K01819	E5.3.1.26, lacA, lacB	galactose-6-phosphate isomerase	5.3.1.26	Metabolism; Carbohydrate metabolism; Galactose metabolism [PATH:ko00052] Metabolism; Global and overview maps; Metabolic pathways [PATH:ko01100]
GM000800	100	4e-141	lpq:AF91_02435	K02530	lacR	DeoR family transcriptional regulator, lactose phosphotransferase system repressor	--
GM000801	100	1.4e-115	lca:LSEI_0682
GM000802	99.5	2.2e-212	lcs:LCBD_0753	K03547	sbcD, mre11	DNA repair protein SbcD/Mre11	--
GM000803	99.7	0	lcz:LCAZH_0615	K03546	sbcC, rad50	DNA repair protein SbcC/Rad50	--
GM000804	100	2.5e-17	lcx:LCA12A_1716
GM000805	77.5	2.4e-08	lcl:LOCK919_0786
GM000806	97.4	7e-13	lcs:LCBD_0757
GM000807	100	4.5e-87	lcs:LCBD_0758	K13993	HSP20	HSP20 family protein	--	Genetic Information Processing; Folding, sorting and degradation; Protein processing in endoplasmic reticulum [PATH:ko04141]
GM000808	96.1	3.6e-37	lcs:LCBD_0759
GM000809	99.7	2.1e-212	lcb:LCABL_07540	K03575	mutY	A/G-specific adenine glycosylase	3.2.2.31	Genetic Information Processing; Replication and repair; Base excision repair [PATH:ko03410]
GM000810	99.6	7e-149	lpq:AF91_02475
GM000811	99.5	1.6e-122	lpi:LBPG_02755
GM000812	100	2.2e-26	lcs:LCBD_0764
GM000813	100	1.5e-91	lcs:LCBD_0765
GM000814	99.5	6.7e-118	lpap:LBPC_0613
GM000815	99.6	2.2e-153	lce:LC2W_0767	K00941	thiD	hydroxymethylpyrimidine/phosphomethylpyrimidine kinase	2.7.1.49 2.7.4.7	Metabolism; Metabolism of cofactors and vitamins; Thiamine metabolism [PATH:ko00730] Metabolism; Global and overview maps; Metabolic pathways [PATH:ko01100]
GM000816	100	3.7e-198	lpap:LBPC_0615
GM000817	100	2.1e-156	lpq:AF91_02520
GM000818	100	2.6e-117	lca:LSEI_0698	K07118	K07118	uncharacterized protein	--
GM000819	100	2.5e-16	lcz:LCAZH_0635
GM000821	99.9	0	lce:LC2W_0772	K05349	bglX	beta-glucosidase	3.2.1.21	Metabolism; Metabolism of other amino acids; Cyanoamino acid metabolism [PATH:ko00460] Metabolism; Carbohydrate metabolism; Starch and sucrose metabolism [PATH:ko00500] Metabolism; Biosynthesis of other secondary metabolites; Phenylpropanoid biosynthesis [PATH:ko00940] Metabolism; Global and overview maps; Metabolic pathways [PATH:ko01100] Metabolism; Global and overview maps; Biosynthesis of sec…
GM000822	100	6.7e-16	lcz:LCAZH_0637
GM000823	99.7	3e-170	lcs:LCBD_0775	K01989	ABC.X4.S	putative ABC transport system substrate-binding protein	--
GM000824	98.1	4.3e-169	lpq:AF91_02545	K01989	ABC.X4.S	putative ABC transport system substrate-binding protein	--
GM000825	99.7	7.2e-172	lcz:LCAZH_0641	K05832	ABC.X4.P	putative ABC transport system permease protein	--
GM000826	100	1.1e-144	lpi:LBPG_02771	K05833	ABC.X4.A	putative ABC transport system ATP-binding protein	--
GM000827	100	1.2e-07	lcs:LCBD_0780
GM000828	99.4	4.7e-176	lca:LSEI_0706
GM000829	99.3	0	lpq:AF91_02565
GM000830	100	1.1e-183	lcx:LCA12A_1735	K20534	gtrB, csbB	polyisoprenyl-phosphate glycosyltransferase	2.4.-.-
GM000831	99.4	0	lpap:LBPC_0626
GM000832	100	1.3e-71	lcx:LCA12A_1737
GM000833	100	1.7e-127	lcs:LCBD_0786	K14983	ciaR	two-component system, OmpR family, response regulator CiaR	--	Environmental Information Processing; Signal transduction; Two-component system [PATH:ko02020] Cellular Processes; Cellular community - prokaryotes; Quorum sensing [PATH:ko02024]
GM000834	99.8	9.4e-244	lcx:LCA12A_1739	K14982	ciaH	two-component system, OmpR family, sensor histidine kinase CiaH	2.7.13.3	Environmental Information Processing; Signal transduction; Two-component system [PATH:ko02020] Cellular Processes; Cellular community - prokaryotes; Quorum sensing [PATH:ko02024]
GM000835	100	1.2e-72	lcw:BN194_07820
GM000836	98.8	9e-275	lpi:LBPG_02780
GM000837	99.3	3e-161	lcw:BN194_07840
GM000838	99.3	3.3e-157	lpap:LBPC_0634	K01574	adc	acetoacetate decarboxylase	4.1.1.4	Metabolism; Lipid metabolism; Synthesis and degradation of ketone bodies [PATH:ko00072] Metabolism; Carbohydrate metabolism; Propanoate metabolism [PATH:ko00640] Metabolism; Global and overview maps; Metabolic pathways [PATH:ko01100]
GM000839	100	4.6e-122	lpq:AF91_02615
GM000840	99.5	3e-206	lpi:LBPG_02784
GM000841	95	1.4e-37	lpq:AF91_02635
GM000842	93.1	1.3e-182	lcz:LCAZH_0661
GM000843	99.1	2.6e-54	lpq:AF91_02760
GM000844	100	1e-52	lca:LSEI_0723
GM000845	99	1.2e-48	lpq:AF91_02770
GM000846	98.1	1.1e-206	lcw:BN194_07910
GM000847	98.3	4.4e-58	lpap:LBPC_0654
GM000848	100	3.1e-83	lcs:LCBD_0801
GM000849	99.7	1.3e-206	lca:LSEI_0728
GM000850	100	9.6e-28	lcl:LOCK919_0831
GM000851	100	1.1e-112	lcs:LCBD_0804	K01356	lexA	repressor LexA	3.4.21.88
GM000852	98.1	2e-79	lpq:AF91_02805
GM000853	99.4	9.8e-174	lcw:BN194_07990	K07088	K07088	uncharacterized protein	--
GM000854	98.5	8.8e-107	lpap:LBPC_0661
GM000855	96	1.2e-17	lcw:BN194_08010
GM000856	96	1.6e-160	lcz:LCAZH_0676
GM000857	100	7.7e-102	lca:LSEI_0736	K01934	MTHFS	5-formyltetrahydrofolate cyclo-ligase	6.3.3.2	Metabolism; Metabolism of cofactors and vitamins; One carbon pool by folate [PATH:ko00670] Metabolism; Global and overview maps; Metabolic pathways [PATH:ko01100]
GM000858	100	1.1e-61	lcz:LCAZH_0678
GM000859	100	1.6e-176	lce:LC2W_0813	K03284	corA	magnesium transporter	--
GM000860	99	4.8e-159	lcx:LCA12A_1764
GM000861	99.8	0	lcb:LCABL_08060	K22212	mleA, mleS	malolactic enzyme	4.1.1.101	Metabolism; Carbohydrate metabolism; Pyruvate metabolism [PATH:ko00620] Metabolism; Global and overview maps; Microbial metabolism in diverse environments [PATH:ko01120]
GM000862	99.7	1.5e-177	lpq:AF91_02855	K07088	K07088	uncharacterized protein	--
GM000863	100	9.2e-91	lcw:BN194_08090	K11065	tpx	thiol peroxidase, atypical 2-Cys peroxiredoxin	1.11.1.15
GM000864	100	1.2e-85	lca:LSEI_0743
GM000866	99.8	0	lcl:LOCK919_0849
GM000867	100	2.3e-59	lpap:LBPC_0674
GM000868	100	1.5e-97	lcx:LCA12A_1773
GM000869	99.4	3.3e-82	lrh:LGG_01025
GM000871	99.3	1e-80	lcb:LCABL_08150	K00940	ndk, NME	nucleoside-diphosphate kinase	2.7.4.6	Metabolism; Nucleotide metabolism; Purine metabolism [PATH:ko00230] Metabolism; Nucleotide metabolism; Pyrimidine metabolism [PATH:ko00240] Metabolism; Xenobiotics biodegradation and metabolism; Drug metabolism - other enzymes [PATH:ko00983] Metabolism; Global and overview maps; Metabolic pathways [PATH:ko01100] Metabolism; Global and overview maps; Biosynthesis of secondary metabolites [PATH:ko0…
GM000872	99.6	0	lcw:BN194_08170	K12952	ctpE	cation-transporting P-type ATPase E	3.6.3.-
GM000873	99	3.4e-179	lpap:LBPC_0679	K01259	pip	proline iminopeptidase	3.4.11.5	Metabolism; Amino acid metabolism; Arginine and proline metabolism [PATH:ko00330]
GM000874	100	1.2e-60	lce:LC2W_0828
GM000875	99.4	9.5e-94	lpap:LBPC_0681
GM000876	99.7	1.9e-211	lpi:LBPG_02820
GM000877	100	4.7e-122	lcl:LOCK919_0858	K01091	gph	phosphoglycolate phosphatase	3.1.3.18	Metabolism; Carbohydrate metabolism; Glyoxylate and dicarboxylate metabolism [PATH:ko00630] Metabolism; Global and overview maps; Metabolic pathways [PATH:ko01100] Metabolism; Global and overview maps; Biosynthesis of secondary metabolites [PATH:ko01110] Metabolism; Global and overview maps; Biosynthesis of antibiotics [PATH:ko01130]
GM000878	100	9.8e-79	lcz:LCAZH_0698
GM000879	99.4	3.5e-179	lcz:LCAZH_0699	K06889	K06889	uncharacterized protein	--
GM000880	100	2.1e-84	lca:LSEI_0757	K03647	nrdI	protein involved in ribonucleotide reduction	--
GM000882	99.1	5.8e-131	lce:LC2W_0836
GM000883	99.7	1.7e-162	lcl:LOCK919_0863
GM000884	100	2.6e-162	lcz:LCAZH_0704
GM000885	99.5	8.1e-119	lca:LSEI_0761
GM000886	100	8.3e-78	lcb:LCABL_08290
GM000887	100	8.2e-15	lpap:LBPC_0692
GM000889	100	7.5e-221	lcl:LOCK919_0868
GM000890	100	1.5e-85	lcz:LCAZH_0709	K07173	luxS	S-ribosylhomocysteine lyase	4.4.1.21	Metabolism; Amino acid metabolism; Cysteine and methionine metabolism [PATH:ko00270] Metabolism; Global and overview maps; Metabolic pathways [PATH:ko01100] Metabolism; Global and overview maps; Biosynthesis of amino acids [PATH:ko01230] Cellular Processes; Cellular community - prokaryotes; Quorum sensing [PATH:ko02024] Cellular Processes; Cellular community - prokaryotes; Biofilm formation - Esc…
GM000891	100	4.5e-108	lpap:LBPC_0695
GM000892	99.5	8.7e-104	lcl:LOCK919_0872	K03550	ruvA	holliday junction DNA helicase RuvA	3.6.4.12	Genetic Information Processing; Replication and repair; Homologous recombination [PATH:ko03440]
GM000894	99.7	4e-189	lcz:LCAZH_0713	K03551	ruvB	holliday junction DNA helicase RuvB	3.6.4.12	Genetic Information Processing; Replication and repair; Homologous recombination [PATH:ko03440]
GM000895	99.4	2.4e-208	lcw:BN194_08370	K07568	queA	S-adenosylmethionine:tRNA ribosyltransferase-isomerase	2.4.99.17
GM000896	100	2.3e-225	lpq:AF91_10340	K00773	tgt, QTRT1	queuine tRNA-ribosyltransferase	2.4.2.29
GM000897	98.5	2.4e-68	lce:LC2W_0850	K03210	yajC	preprotein translocase subunit YajC	--	Cellular Processes; Cellular community - prokaryotes; Quorum sensing [PATH:ko02024] Genetic Information Processing; Folding, sorting and degradation; Protein export [PATH:ko03060] Environmental Information Processing; Membrane transport; Bacterial secretion system [PATH:ko03070]
GM000898	100	0	lcl:LOCK919_0877	K04072	adhE	acetaldehyde dehydrogenase / alcohol dehydrogenase	1.2.1.10 1.1.1.1	Metabolism; Carbohydrate metabolism; Glycolysis / Gluconeogenesis [PATH:ko00010] Metabolism; Lipid metabolism; Fatty acid degradation [PATH:ko00071] Metabolism; Amino acid metabolism; Tyrosine metabolism [PATH:ko00350] Metabolism; Carbohydrate metabolism; Pyruvate metabolism [PATH:ko00620] Metabolism; Xenobiotics biodegradation and metabolism; Chloroalkane and chloroalkene degradation [PATH:ko006…
GM000899	100	3.7e-116	lcx:LCA12A_0779	K03709	troR	DtxR family transcriptional regulator, Mn-dependent transcriptional regulator	--
GM000900	99.8	7.6e-290	lce:LC2W_0853	K00036	G6PD, zwf	glucose-6-phosphate 1-dehydrogenase	1.1.1.49 1.1.1.363	Metabolism; Carbohydrate metabolism; Pentose phosphate pathway [PATH:ko00030] Metabolism; Metabolism of other amino acids; Glutathione metabolism [PATH:ko00480] Metabolism; Global and overview maps; Metabolic pathways [PATH:ko01100] Metabolism; Global and overview maps; Biosynthesis of secondary metabolites [PATH:ko01110] Metabolism; Global and overview maps; Microbial metabolism in diverse envir…
GM000901	99.7	1.5e-205	lpq:AF91_10315	K02346	dinB	DNA polymerase IV	2.7.7.7
GM000902	100	4e-242	lca:LSEI_0780
GM000903	100	3.9e-178	lpq:AF91_10305	K06881	nrnA	bifunctional oligoribonuclease and PAP phosphatase NrnA	3.1.3.7 3.1.13.3	Metabolism; Energy metabolism; Sulfur metabolism [PATH:ko00920] Metabolism; Global and overview maps; Metabolic pathways [PATH:ko01100] Metabolism; Global and overview maps; Microbial metabolism in diverse environments [PATH:ko01120]
GM000904	100	5.2e-253	lpap:LBPC_0707	K18692	cshB	ATP-dependent RNA helicase CshB	3.6.4.13
GM000905	100	1.9e-174	lca:LSEI_0783
GM000907	100	0	lca:LSEI_0784	K01872	AARS, alaS	alanyl-tRNA synthetase	6.1.1.7	Genetic Information Processing; Translation; Aminoacyl-tRNA biosynthesis [PATH:ko00970]
GM000908	97.8	1.6e-16	lcw:BN194_08490
GM000909	98.1	6.5e-22	lce:LC2W_0861
GM000910	100	4.9e-43	lro:LOCK900_0714
GM000911	100	3.4e-73	lpap:LBPC_0712	K07447	ruvX	putative holliday junction resolvase	3.1.-.-
GM000912	100	9e-55	lcs:LCBD_0863
GM000913	100	1.4e-36	lcw:BN194_08540	K09888	zapA	cell division protein ZapA	--
GM000914	99.4	1.3e-95	lpi:LBPG_02853
GM000915	100	0	lpq:AF91_10255	K07456	mutS2	DNA mismatch repair protein MutS2	--	Genetic Information Processing; Replication and repair; Mismatch repair [PATH:ko03430]
GM000916	100	6.2e-53	lcl:LOCK919_0893	K03671	trxA	thioredoxin 1	--	Organismal Systems; Immune system; NOD-like receptor signaling pathway [PATH:ko04621] Human Diseases; Cardiovascular diseases; Fluid shear stress and atherosclerosis [PATH:ko05418]
GM000917	100	2.3e-21	lcz:LCAZH_0736
GM000918	100	2.3e-294	lpap:LBPC_0719	K03367	dltA	D-alanine--poly(phosphoribitol) ligase subunit 1	6.1.1.13	Metabolism; Metabolism of other amino acids; D-Alanine metabolism [PATH:ko00473] Human Diseases; Drug resistance: Antimicrobial; Cationic antimicrobial peptide (CAMP) resistance [PATH:ko01503] Environmental Information Processing; Signal transduction; Two-component system [PATH:ko02020] Human Diseases; Infectious diseases: Bacterial; Staphylococcus aureus infection [PATH:ko05150]
GM000919	100	5.2e-244	lce:LC2W_0871	K03739	dltB	membrane protein involved in D-alanine export	--	Human Diseases; Drug resistance: Antimicrobial; Cationic antimicrobial peptide (CAMP) resistance [PATH:ko01503] Environmental Information Processing; Signal transduction; Two-component system [PATH:ko02020] Human Diseases; Infectious diseases: Bacterial; Staphylococcus aureus infection [PATH:ko05150]
GM000920	100	3.8e-37	lce:LC2W_0872	K14188	dltC	D-alanine--poly(phosphoribitol) ligase subunit 2	6.1.1.13	Metabolism; Metabolism of other amino acids; D-Alanine metabolism [PATH:ko00473] Human Diseases; Drug resistance: Antimicrobial; Cationic antimicrobial peptide (CAMP) resistance [PATH:ko01503] Environmental Information Processing; Signal transduction; Two-component system [PATH:ko02020] Human Diseases; Infectious diseases: Bacterial; Staphylococcus aureus infection [PATH:ko05150]
GM000921	99.5	8.3e-245	lcb:LCABL_08580	K03740	dltD	D-alanine transfer protein	--	Human Diseases; Drug resistance: Antimicrobial; Cationic antimicrobial peptide (CAMP) resistance [PATH:ko01503] Environmental Information Processing; Signal transduction; Two-component system [PATH:ko02020] Human Diseases; Infectious diseases: Bacterial; Staphylococcus aureus infection [PATH:ko05150]
GM000922	100	8e-87	lpi:LBPG_02861
GM000923	99.6	9.4e-277	lca:LSEI_0799
GM000924	99.4	1.3e-95	lpap:LBPC_0725	K07095	K07095	uncharacterized protein	--
GM000925	99.6	4.8e-136	lcb:LCABL_08620	K02440	GLPF	glycerol uptake facilitator protein	--
GM000926	100	5.1e-86	lcz:LCAZH_0745
GM000927	98.7	2.8e-162	lcz:LCAZH_0746	K08974	K08974	putative membrane protein	--
GM000928	100	2.4e-158	lca:LSEI_0804	K22044	ybiO	moderate conductance mechanosensitive channel	--
GM000929	100	1.3e-69	lce:LC2W_0882
GM000930	100	3.6e-93	lcl:LOCK919_0910
GM000931	100	4.4e-91	lpi:LBPG_02871	K07105	K07105	uncharacterized protein	--
GM000932	99.7	1.5e-213	lpi:LBPG_02872	K01271	pepQ	Xaa-Pro dipeptidase	3.4.13.9
GM000933	99.7	8.7e-181	lcw:BN194_08750	K02529	lacI, galR	LacI family transcriptional regulator	--
GM000934	97.3	0	lcx:LCA12A_0810	K03693	pbp1b	penicillin-binding protein 1B	--	Metabolism; Glycan biosynthesis and metabolism; Peptidoglycan biosynthesis [PATH:ko00550] Metabolism; Global and overview maps; Metabolic pathways [PATH:ko01100] Human Diseases; Drug resistance: Antimicrobial; beta-Lactam resistance [PATH:ko01501]
GM000935	99.6	3.2e-126	lpi:LBPG_02875	K01560	E3.8.1.2	2-haloacid dehalogenase	3.8.1.2	Metabolism; Xenobiotics biodegradation and metabolism; Chlorocyclohexane and chlorobenzene degradation [PATH:ko00361] Metabolism; Xenobiotics biodegradation and metabolism; Chloroalkane and chloroalkene degradation [PATH:ko00625] Metabolism; Global and overview maps; Metabolic pathways [PATH:ko01100] Metabolism; Global and overview maps; Microbial metabolism in diverse environments [PATH:ko01120]
GM000936	100	6.9e-138	lce:LC2W_0892	K03524	birA	BirA family transcriptional regulator, biotin operon repressor / biotin---[acetyl-CoA-carboxylase] ligase	6.3.4.15	Metabolism; Metabolism of cofactors and vitamins; Biotin metabolism [PATH:ko00780] Metabolism; Global and overview maps; Metabolic pathways [PATH:ko01100]
GM000937	100	6.8e-272	lpap:LBPC_0738
GM000938	99.6	1.6e-259	lpq:AF91_10125	K01126	E3.1.4.46, glpQ, ugpQ	glycerophosphoryl diester phosphodiesterase	3.1.4.46	Metabolism; Lipid metabolism; Glycerophospholipid metabolism [PATH:ko00564]
GM000939	100	2.6e-54	lcz:LCAZH_0760
GM000940	95.9	3.1e-18	lcz:LCAZH_0761
GM000941	99.2	1.9e-194	lcz:LCAZH_0762
GM000942	100	1.1e-127	lpq:AF91_10110
GM000943	100	6.5e-115	lca:LSEI_0818
GM000944	99.8	1.4e-266	lca:LSEI_0819
GM000945	100	7e-123	lpi:LBPG_02885
GM000946	100	7.4e-140	lpi:LBPG_02886	K01101	E3.1.3.41	4-nitrophenyl phosphatase	3.1.3.41	Metabolism; Xenobiotics biodegradation and metabolism; Aminobenzoate degradation [PATH:ko00627] Metabolism; Global and overview maps; Microbial metabolism in diverse environments [PATH:ko01120]
GM000947	99.5	3e-115	lca:LSEI_0822
GM000948	100	4.3e-120	lpap:LBPC_0748	K03975	dedA	membrane-associated protein	--
GM000949	100	4.8e-87	lpq:AF91_10070
GM000950	100	7.5e-185	lpq:AF91_10065	K21567	fnr	ferredoxin/flavodoxin---NADP+ reductase	1.18.1.2 1.19.1.1
GM000951	100	4e-109	lca:LSEI_0827	K03768	PPIB, ppiB	peptidyl-prolyl cis-trans isomerase B (cyclophilin B)	5.2.1.8
GM000952	100	1.1e-67	lcs:LCBD_0906	K07570	GSP13	general stress protein 13	--
GM000954	100	1.5e-35	lrh:LGG_00813
GM000955	77.8	1.1e-11	baco:OXB_1053
GM000956	100	2.8e-50	lrl:LC705_00833
GM000960	99.5	2e-94	lcs:LCBD_0911	K03091	sigH	RNA polymerase sporulation-specific sigma factor	--
GM000961	100	5.5e-299	lpi:LBPG_02974
GM000962	99.5	1.4e-230	lcw:BN194_09040	K19002	mgs, bgsB	1,2-diacylglycerol 3-alpha-glucosyltransferase	2.4.1.337	Metabolism; Lipid metabolism; Glycerolipid metabolism [PATH:ko00561] Metabolism; Global and overview maps; Metabolic pathways [PATH:ko01100]
GM000963	100	6.8e-197	lce:LC2W_0917	K13678	cpoA	1,2-diacylglycerol-3-alpha-glucose alpha-1,2-galactosyltransferase	2.4.1.-
GM000964	100	1.6e-185	lcl:LOCK919_0965	K07027	K07027	glycosyltransferase 2 family protein	--
GM000965	100	6e-60	lcs:LCBD_0916
GM000966	99.5	2.5e-219	lcx:LCA12A_0007	K00841	patA	aminotransferase	2.6.1.-	Metabolism; Amino acid metabolism; Lysine biosynthesis [PATH:ko00300] Metabolism; Global and overview maps; Metabolic pathways [PATH:ko01100] Metabolism; Global and overview maps; Biosynthesis of secondary metabolites [PATH:ko01110] Metabolism; Global and overview maps; Biosynthesis of amino acids [PATH:ko01230]
GM000967	100	5.1e-45	lcz:LCAZH_0809
GM000968	100	2.9e-18	lcx:LCA12A_0009
GM000969	100	0	lca:LSEI_0868	K19005	ltaS	lipoteichoic acid synthase	2.7.8.20	Metabolism; Lipid metabolism; Glycerolipid metabolism [PATH:ko00561] Metabolism; Global and overview maps; Metabolic pathways [PATH:ko01100]
GM000970	100	1.4e-79	lcz:LCAZH_0812	K09825	perR	Fur family transcriptional regulator, peroxide stress response regulator	--
GM000971	100	1.5e-35	lrh:LGG_00813
GM000972	77.8	1.1e-11	baco:OXB_1053
GM000973	100	2.8e-50	lrl:LC705_00833
GM000974	99.5	1.2e-114	lce:LC2W_0927
GM000975	98.2	1.5e-24	lce:LC2W_0928
GM000976	99.7	1e-220	lcx:LCA12A_1202	K00789	metK	S-adenosylmethionine synthetase	2.5.1.6	Metabolism; Amino acid metabolism; Cysteine and methionine metabolism [PATH:ko00270] Metabolism; Global and overview maps; Metabolic pathways [PATH:ko01100] Metabolism; Global and overview maps; Biosynthesis of secondary metabolites [PATH:ko01110] Metabolism; Global and overview maps; Biosynthesis of amino acids [PATH:ko01230]
GM000977	100	1.7e-281	lce:LC2W_0930
GM000978	97.4	1.4e-80	lca:LSEI_0879
GM000979	100	5.3e-275	lcs:LCBD_0927
GM000980	99.6	4.7e-128	lpap:LBPC_0823
GM000981	99.1	8.2e-119	lcl:LOCK919_0985	K19302	bcrC	undecaprenyl-diphosphatase	3.6.1.27	Metabolism; Glycan biosynthesis and metabolism; Peptidoglycan biosynthesis [PATH:ko00550]
GM000982	62.2	6.6e-08	lcl:LOCK919_0900
GM000983	99.9	0	lcs:LCBD_0930	K01869	LARS, leuS	leucyl-tRNA synthetase	6.1.1.4	Genetic Information Processing; Translation; Aminoacyl-tRNA biosynthesis [PATH:ko00970]
GM000984	100	7.1e-305	lce:LC2W_0936
GM000985	99.6	1.2e-128	lce:LC2W_0937	K06183	rsuA	16S rRNA pseudouridine516 synthase	5.4.99.19
GM000986	100	1.2e-34	lcs:LCBD_0934	K07069	K07069	uncharacterized protein	--
GM000987	100	3.5e-09	lpq:AF91_09730
GM000988	100	2.3e-147	lcb:LCABL_09520	K17758	nnr	ADP-dependent NAD(P)H-hydrate dehydratase	4.2.1.136
GM000989	98.3	2.6e-96	lcw:BN194_09260
GM000990	99.2	1.2e-287	lca:LSEI_0891	K00712	tagE	poly(glycerol-phosphate) alpha-glucosyltransferase	2.4.1.52
GM000991	99.6	8.8e-305	lpq:AF91_09450	K00712	tagE	poly(glycerol-phosphate) alpha-glucosyltransferase	2.4.1.52
GM000992	100	2.5e-85	lcx:LCA12A_2182	K00432	gpx	glutathione peroxidase	1.11.1.9	Metabolism; Metabolism of other amino acids; Glutathione metabolism [PATH:ko00480] Metabolism; Lipid metabolism; Arachidonic acid metabolism [PATH:ko00590] Organismal Systems; Endocrine system; Thyroid hormone synthesis [PATH:ko04918]
GM000993	100	5.9e-232	lcs:LCBD_0989	K14155	patB, malY	cysteine-S-conjugate beta-lyase	4.4.1.13	Metabolism; Amino acid metabolism; Cysteine and methionine metabolism [PATH:ko00270] Metabolism; Metabolism of other amino acids; Selenocompound metabolism [PATH:ko00450] Metabolism; Global and overview maps; Metabolic pathways [PATH:ko01100] Metabolism; Global and overview maps; Biosynthesis of secondary metabolites [PATH:ko01110] Metabolism; Global and overview maps; Biosynthesis of amino acids…
GM000994	99.8	4.8e-259	lcz:LCAZH_0838
GM000995	100	6.8e-40	lcw:BN194_09820	K07166	K07166	ACT domain-containing protein	--
GM000996	99.8	3.8e-248	lpq:AF91_09425	K09157	K09157	uncharacterized protein	--
GM000998	98.8	8e-43	lpap:LBPC_0839	K06198	coiA	competence protein CoiA	--
GM000999	100	3e-89	lcz:LCAZH_0842
GM001000	99.5	1.1e-106	lpq:AF91_09410
GM001001	100	2.3e-118	lcs:LCBD_0997	K07816	E2.7.6.5X	putative GTP pyrophosphokinase	2.7.6.5	Metabolism; Nucleotide metabolism; Purine metabolism [PATH:ko00230]
GM001002	100	5.2e-152	lcb:LCABL_10160	K00858	ppnK, NADK	NAD+ kinase	2.7.1.23	Metabolism; Metabolism of cofactors and vitamins; Nicotinate and nicotinamide metabolism [PATH:ko00760] Metabolism; Global and overview maps; Metabolic pathways [PATH:ko01100]
GM001003	99.7	7.4e-171	lcx:LCA12A_2192	K06180	rluD	23S rRNA pseudouridine1911/1915/1917 synthase	5.4.99.23
GM001004	100	7.8e-204	lca:LSEI_0904	K03734	apbE	FAD:protein FMN transferase	2.7.1.180
GM001005	100	2.2e-113	lcs:LCBD_1001	K06201	cutC	copper homeostasis protein	--
GM001006	100	1.4e-149	lpq:AF91_09380	K06153	bacA	undecaprenyl-diphosphatase	3.6.1.27	Metabolism; Glycan biosynthesis and metabolism; Peptidoglycan biosynthesis [PATH:ko00550]
GM001007	99.7	3.7e-198	lpi:LBPG_00077	K07404	pgl	6-phosphogluconolactonase	3.1.1.31	Metabolism; Carbohydrate metabolism; Pentose phosphate pathway [PATH:ko00030] Metabolism; Global and overview maps; Metabolic pathways [PATH:ko01100] Metabolism; Global and overview maps; Biosynthesis of secondary metabolites [PATH:ko01110] Metabolism; Global and overview maps; Microbial metabolism in diverse environments [PATH:ko01120] Metabolism; Global and overview maps; Biosynthesis of antibi…
GM001008	99.2	5.2e-62	lcb:LCABL_10220	K02781	PTS-Gut-EIIA, srlB	PTS system, glucitol/sorbitol-specific IIA component	2.7.1.198	Metabolism; Carbohydrate metabolism; Fructose and mannose metabolism [PATH:ko00051] Environmental Information Processing; Membrane transport; Phosphotransferase system (PTS) [PATH:ko02060]
GM001009	100	1e-43	lcw:BN194_09950	K02954	RP-S14, MRPS14, rpsN	small subunit ribosomal protein S14	--	Genetic Information Processing; Translation; Ribosome [PATH:ko03010]
GM001010	99.7	2.2e-192	lcw:BN194_09960	K00364	E1.7.1.7, guaC	GMP reductase	1.7.1.7	Metabolism; Nucleotide metabolism; Purine metabolism [PATH:ko00230]
GM001011	100	8.8e-175	lpap:LBPC_0852	K03284	corA	magnesium transporter	--
GM001012	100	1.1e-157	lca:LSEI_0913	K00563	rlmA1	23S rRNA (guanine745-N1)-methyltransferase	2.1.1.187
GM001013	100	4.6e-31	lcw:BN194_09980
GM001014	99.4	8.3e-95	lcw:BN194_09990	K03216	trmL, cspR	tRNA (cytidine/uridine-2'-O-)-methyltransferase	2.1.1.207
GM001015	100	5.1e-71	lcb:LCABL_10280
GM001017	100	0	lcl:LOCK919_1060	K03466	ftsK, spoIIIE	DNA segregation ATPase FtsK/SpoIIIE, S-DNA-T family	--
GM001018	99.5	6.6e-234	lca:LSEI_0917
GM001019	99.8	1.9e-244	lcl:LOCK919_1062
GM001020	100	3.2e-132	lca:LSEI_0919	K00059	fabG	3-oxoacyl-[acyl-carrier protein] reductase	1.1.1.100	Metabolism; Lipid metabolism; Fatty acid biosynthesis [PATH:ko00061] Metabolism; Biosynthesis of other secondary metabolites; Prodigiosin biosynthesis [PATH:ko00333] Metabolism; Metabolism of cofactors and vitamins; Biotin metabolism [PATH:ko00780] Metabolism; Lipid metabolism; Biosynthesis of unsaturated fatty acids [PATH:ko01040] Metabolism; Global and overview maps; Metabolic pathways [PATH:ko…
GM001021	100	2.1e-165	lcz:LCAZH_0862
GM001022	100	2.9e-107	lcl:LOCK919_1065	K00995	pgsA, PGS1	CDP-diacylglycerol---glycerol-3-phosphate 3-phosphatidyltransferase	2.7.8.5	Metabolism; Lipid metabolism; Glycerophospholipid metabolism [PATH:ko00564] Metabolism; Global and overview maps; Metabolic pathways [PATH:ko01100]
GM001023	99.3	6.7e-231	lcl:LOCK919_1066	K03742	pncC	nicotinamide-nucleotide amidase	3.5.1.42	Metabolism; Metabolism of cofactors and vitamins; Nicotinate and nicotinamide metabolism [PATH:ko00760]
GM001024	100	6.2e-193	lcl:LOCK919_1067	K03553	recA	recombination protein RecA	--	Genetic Information Processing; Replication and repair; Homologous recombination [PATH:ko03440]
GM001025	100	2.3e-289	lpi:LBPG_00095	K18682	rny	ribonucrease Y	3.1.-.-	Genetic Information Processing; Folding, sorting and degradation; RNA degradation [PATH:ko03018]
GM001026	99.5	1.3e-116	lpi:LBPG_00096
GM001027	99.5	1.5e-238	lpi:LBPG_00097	K02240	comFA	competence protein ComFA	--
GM001028	100	5.6e-82	lpi:LBPG_00098	K02242	comFC	competence protein ComFC	--
GM001029	100	3.9e-98	lcz:LCAZH_0870
GM001030	94.6	1.8e-33	lcw:BN194_10160
GM001031	99.9	0	lca:LSEI_0929	K03070	secA	preprotein translocase subunit SecA	--	Cellular Processes; Cellular community - prokaryotes; Quorum sensing [PATH:ko02024] Genetic Information Processing; Folding, sorting and degradation; Protein export [PATH:ko03060] Environmental Information Processing; Membrane transport; Bacterial secretion system [PATH:ko03070]
GM001032	100	4.6e-190	lpap:LBPC_0870	K02836	prfB	peptide chain release factor 2	--
GM001033	100	2.3e-124	lpi:LBPG_00102	K09812	ftsE	cell division transport system ATP-binding protein	--	Environmental Information Processing; Membrane transport; ABC transporters [PATH:ko02010]
GM001034	100	1e-161	lcb:LCABL_10460	K09811	ftsX	cell division transport system permease protein	--	Environmental Information Processing; Membrane transport; ABC transporters [PATH:ko02010]
GM001035	99.7	2.4e-206	lce:LC2W_1033
GM001036	100	1.4e-129	lcw:BN194_10220	K07658	phoB1, phoP	two-component system, OmpR family, alkaline phosphatase synthesis response regulator PhoP	--	Environmental Information Processing; Signal transduction; Two-component system [PATH:ko02020]
GM001037	100	0	lcs:LCBD_1030	K07636	phoR	two-component system, OmpR family, phosphate regulon sensor histidine kinase PhoR	2.7.13.3	Environmental Information Processing; Signal transduction; Two-component system [PATH:ko02020]
GM001038	99.7	1.3e-156	lcz:LCAZH_0879	K02040	pstS	phosphate transport system substrate-binding protein	--	Environmental Information Processing; Membrane transport; ABC transporters [PATH:ko02010] Environmental Information Processing; Signal transduction; Two-component system [PATH:ko02020] Human Diseases; Infectious diseases: Bacterial; Tuberculosis [PATH:ko05152]
GM001039	99.7	1.1e-166	lpq:AF91_09230	K02037	pstC	phosphate transport system permease protein	--	Environmental Information Processing; Membrane transport; ABC transporters [PATH:ko02010]
GM001040	100	3.4e-160	lpi:LBPG_00109	K02038	pstA	phosphate transport system permease protein	--	Environmental Information Processing; Membrane transport; ABC transporters [PATH:ko02010]
GM001041	100	1.7e-150	lpq:AF91_09220	K02036	pstB	phosphate transport system ATP-binding protein	7.3.2.1	Environmental Information Processing; Membrane transport; ABC transporters [PATH:ko02010]
GM001042	100	9.7e-140	lpi:LBPG_00111	K02036	pstB	phosphate transport system ATP-binding protein	7.3.2.1	Environmental Information Processing; Membrane transport; ABC transporters [PATH:ko02010]
GM001043	100	4e-121	lcw:BN194_10290	K02039	phoU	phosphate transport system protein	--
GM001044	100	1.2e-279	lpi:LBPG_00113
GM001045	100	1.1e-39	lpq:AF91_09200
GM001046	100	8.8e-53	lcx:LCA12A_2232	K08972	K08972	putative membrane protein	--
GM001047	100	2.4e-175	lpap:LBPC_0885	K06023	hprK, ptsK	HPr kinase/phosphorylase	2.7.11.- 2.7.4.-
GM001048	100	8.1e-167	lcb:LCABL_10600	K13292	lgt, umpA	phosphatidylglycerol---prolipoprotein diacylglyceryl transferase	2.5.1.145
GM001049	100	1.8e-192	lce:LC2W_1047	K00057	gpsA	glycerol-3-phosphate dehydrogenase (NAD(P)+)	1.1.1.94	Metabolism; Lipid metabolism; Glycerophospholipid metabolism [PATH:ko00564] Metabolism; Global and overview maps; Biosynthesis of secondary metabolites [PATH:ko01110]
GM001050	100	1e-178	lca:LSEI_0948	K00384	trxB, TRR	thioredoxin reductase (NADPH)	1.8.1.9	Metabolism; Metabolism of other amino acids; Selenocompound metabolism [PATH:ko00450]
GM001051	99.5	0	lcw:BN194_10370	K01835	pgm	phosphoglucomutase	5.4.2.2	Metabolism; Carbohydrate metabolism; Glycolysis / Gluconeogenesis [PATH:ko00010] Metabolism; Carbohydrate metabolism; Pentose phosphate pathway [PATH:ko00030] Metabolism; Carbohydrate metabolism; Galactose metabolism [PATH:ko00052] Metabolism; Nucleotide metabolism; Purine metabolism [PATH:ko00230] Metabolism; Carbohydrate metabolism; Starch and sucrose metabolism [PATH:ko00500] Metabolism; Carbo…
GM001052	100	4.1e-115	lce:LC2W_1050
GM001053	99.4	7.7e-185	lpi:LBPG_00122
GM001054	99.1	2.6e-117	lpi:LBPG_00123	K02003	ABC.CD.A	putative ABC transport system ATP-binding protein	--
GM001055	99.7	0	lca:LSEI_0953	K02004	ABC.CD.P	putative ABC transport system permease protein	--
GM001057	100	1.4e-118	lcx:LCA12A_2242	K07023	K07023	putative hydrolases of HD superfamily	--
GM001058	97.4	2.1e-12	lcs:LCBD_1051
GM001059	99.9	0	lcz:LCAZH_0899	K03702	uvrB	excinuclease ABC subunit B	--	Genetic Information Processing; Replication and repair; Nucleotide excision repair [PATH:ko03420]
GM001060	100	0	lpq:AF91_09130	K03701	uvrA	excinuclease ABC subunit A	--	Genetic Information Processing; Replication and repair; Nucleotide excision repair [PATH:ko03420]
GM001061	99.4	1.4e-92	lcx:LCA12A_2245
GM001062	100	7.2e-166	lca:LSEI_0959	K06958	rapZ	RNase adapter protein RapZ	--
GM001063	100	2.3e-192	lcs:LCBD_1057
GM001064	100	4.4e-174	lcl:LOCK919_1107	K09762	K09762	uncharacterized protein	--
GM001065	100	9.4e-11	lce:LC2W_1064
GM001066	100	3.6e-81	lpq:AF91_09105
GM001067	100	3.6e-102	lcx:LCA12A_2250	K01358	clpP, CLPP	ATP-dependent Clp protease, protease subunit	3.4.21.92	Cellular Processes; Cell growth and death; Cell cycle - Caulobacter [PATH:ko04112] Organismal Systems; Aging; Longevity regulating pathway - worm [PATH:ko04212]
GM001068	100	9e-189	lce:LC2W_1116	K05311	cggR	central glycolytic genes regulator	--
GM001069	100	3.5e-193	lcs:LCBD_1110	K00134	GAPDH, gapA	glyceraldehyde 3-phosphate dehydrogenase	1.2.1.12	Metabolism; Carbohydrate metabolism; Glycolysis / Gluconeogenesis [PATH:ko00010] Metabolism; Energy metabolism; Carbon fixation in photosynthetic organisms [PATH:ko00710] Metabolism; Global and overview maps; Metabolic pathways [PATH:ko01100] Metabolism; Global and overview maps; Biosynthesis of secondary metabolites [PATH:ko01110] Metabolism; Global and overview maps; Microbial metabolism in div…
GM001070	99.7	2.4e-222	lcs:LCBD_1111	K00927	PGK, pgk	phosphoglycerate kinase	2.7.2.3	Metabolism; Carbohydrate metabolism; Glycolysis / Gluconeogenesis [PATH:ko00010] Metabolism; Energy metabolism; Carbon fixation in photosynthetic organisms [PATH:ko00710] Metabolism; Global and overview maps; Metabolic pathways [PATH:ko01100] Metabolism; Global and overview maps; Biosynthesis of secondary metabolites [PATH:ko01110] Metabolism; Global and overview maps; Microbial metabolism in div…
GM001071	100	9.6e-140	lpq:AF91_09070	K01803	TPI, tpiA	triosephosphate isomerase (TIM)	5.3.1.1	Metabolism; Carbohydrate metabolism; Glycolysis / Gluconeogenesis [PATH:ko00010] Metabolism; Carbohydrate metabolism; Fructose and mannose metabolism [PATH:ko00051] Metabolism; Carbohydrate metabolism; Inositol phosphate metabolism [PATH:ko00562] Metabolism; Energy metabolism; Carbon fixation in photosynthetic organisms [PATH:ko00710] Metabolism; Global and overview maps; Metabolic pathways [PATH…
GM001072	100	1.8e-247	lpq:AF91_09065	K01689	ENO, eno	enolase	4.2.1.11	Metabolism; Carbohydrate metabolism; Glycolysis / Gluconeogenesis [PATH:ko00010] Metabolism; Energy metabolism; Methane metabolism [PATH:ko00680] Metabolism; Global and overview maps; Metabolic pathways [PATH:ko01100] Metabolism; Global and overview maps; Biosynthesis of secondary metabolites [PATH:ko01110] Metabolism; Global and overview maps; Microbial metabolism in diverse environments [PATH:k…
GM001073	99.8	8.3e-237	lcx:LCA12A_2258	K08217	mef	MFS transporter, DHA3 family, macrolide efflux protein	--
GM001074	98.3	1.9e-61	lcl:LOCK919_1118
GM001075	100	6.7e-286	lpq:AF91_09050
GM001076	98.7	2.4e-33	lpq:AF91_09045	K03075	secG	preprotein translocase subunit SecG	--	Cellular Processes; Cellular community - prokaryotes; Quorum sensing [PATH:ko02024] Genetic Information Processing; Folding, sorting and degradation; Protein export [PATH:ko03060] Environmental Information Processing; Membrane transport; Bacterial secretion system [PATH:ko03070]
GM001077	100	6.2e-139	lcz:LCAZH_0918	K03928	yvaK	carboxylesterase	3.1.1.1
GM001078	100	0	lca:LSEI_0976	K12573	rnr, vacB	ribonuclease R	3.1.-.-	Genetic Information Processing; Folding, sorting and degradation; RNA degradation [PATH:ko03018]
GM001079	100	9.4e-85	lpi:LBPG_03047	K03664	smpB	SsrA-binding protein	--
GM001080	99.1	3.3e-177	lcx:LCA12A_2265
GM001082	99.2	4.3e-205	lpi:LBPG_00153	K01187	malZ	alpha-glucosidase	3.2.1.20	Metabolism; Carbohydrate metabolism; Galactose metabolism [PATH:ko00052] Metabolism; Carbohydrate metabolism; Starch and sucrose metabolism [PATH:ko00500] Metabolism; Global and overview maps; Metabolic pathways [PATH:ko01100]
GM001083	100	0	lcl:LOCK919_1128	K01208	cd, ma, nplT	cyclomaltodextrinase / maltogenic alpha-amylase / neopullulanase	3.2.1.54 3.2.1.133 3.2.1.135	Metabolism; Carbohydrate metabolism; Starch and sucrose metabolism [PATH:ko00500] Metabolism; Global and overview maps; Metabolic pathways [PATH:ko01100]
GM001084	99.6	0	lca:LSEI_0982	K00691	mapA	maltose phosphorylase	2.4.1.8	Metabolism; Carbohydrate metabolism; Starch and sucrose metabolism [PATH:ko00500] Metabolism; Global and overview maps; Metabolic pathways [PATH:ko01100]
GM001085	98.7	3.2e-121	lca:LSEI_0983	K01838	pgmB	beta-phosphoglucomutase	5.4.2.6	Metabolism; Carbohydrate metabolism; Starch and sucrose metabolism [PATH:ko00500]
GM001086	95.3	6.2e-16	lpq:AF91_08990
GM001087	100	2.8e-50	lca:LSEI_0985
GM001088	98.1	1.6e-20	lpq:AF91_08980	K07729	K07729	putative transcriptional regulator	--
GM001089	100	2.1e-15	lcz:LCAZH_0934
GM001090	99.5	3.5e-240	lcz:LCAZH_0935	K12574	rnj	ribonuclease J	3.1.-.-	Genetic Information Processing; Folding, sorting and degradation; RNA degradation [PATH:ko03018]
GM001091	100	2.6e-249	lpi:LBPG_00166	K02027	ABC.MS.S	multiple sugar transport system substrate-binding protein	--
GM001092	100	2.4e-152	lpap:LBPC_0928	K02026	ABC.MS.P1	multiple sugar transport system permease protein	--
GM001093	100	1.5e-171	lpap:LBPC_0929	K02025	ABC.MS.P	multiple sugar transport system permease protein	--
GM001094	99.7	3.8e-198	lce:LC2W_1145	K10112	msmX, msmK, malK, sugC, ggtA, msiK	multiple sugar transport system ATP-binding protein	--	Environmental Information Processing; Membrane transport; ABC transporters [PATH:ko02010]
GM001095	100	1.3e-124	lce:LC2W_1146
GM001096	100	8.5e-91	lpq:AF91_08945
GM001097	100	8.4e-159	lca:LSEI_0994
GM001098	99.1	4.1e-129	lcl:LOCK919_1147	K03648	UNG, UDG	uracil-DNA glycosylase	3.2.2.27	Genetic Information Processing; Replication and repair; Base excision repair [PATH:ko03410] Human Diseases; Immune diseases; Primary immunodeficiency [PATH:ko05340]
GM001099	99.4	2e-177	lcz:LCAZH_0944	K00625	E2.3.1.8, pta	phosphate acetyltransferase	2.3.1.8	Metabolism; Metabolism of other amino acids; Taurine and hypotaurine metabolism [PATH:ko00430] Metabolism; Carbohydrate metabolism; Pyruvate metabolism [PATH:ko00620] Metabolism; Carbohydrate metabolism; Propanoate metabolism [PATH:ko00640] Metabolism; Energy metabolism; Methane metabolism [PATH:ko00680] Metabolism; Energy metabolism; Carbon fixation pathways in prokaryotes [PATH:ko00720] Metabol…
GM001100	100	3.9e-83	lpq:AF91_08925	K06925	tsaE	tRNA threonylcarbamoyladenosine biosynthesis protein TsaE	--
GM001101	100	1.5e-11	lpq:AF91_08920
GM001102	100	2.2e-167	lpap:LBPC_0937	K01990	ABC-2.A	ABC-2 type transport system ATP-binding protein	--
GM001103	99.8	5.9e-227	lca:LSEI_1000	K01992	ABC-2.P	ABC-2 type transport system permease protein	--
GM001104	99.4	1.7e-98	lca:LSEI_1001	K02342	dnaQ	DNA polymerase III subunit epsilon	2.7.7.7	Metabolism; Nucleotide metabolism; Purine metabolism [PATH:ko00230] Metabolism; Nucleotide metabolism; Pyrimidine metabolism [PATH:ko00240] Metabolism; Global and overview maps; Metabolic pathways [PATH:ko01100] Genetic Information Processing; Replication and repair; DNA replication [PATH:ko03030] Genetic Information Processing; Replication and repair; Mismatch repair [PATH:ko03430] Genetic Infor…
GM001105	100	1e-149	lpq:AF91_08900	K01142	E3.1.11.2, xthA	exodeoxyribonuclease III	3.1.11.2	Genetic Information Processing; Replication and repair; Base excision repair [PATH:ko03410]
GM001106	99	1.1e-169	lce:LC2W_1157	K00075	murB	UDP-N-acetylmuramate dehydrogenase	1.3.1.98	Metabolism; Carbohydrate metabolism; Amino sugar and nucleotide sugar metabolism [PATH:ko00520] Metabolism; Glycan biosynthesis and metabolism; Peptidoglycan biosynthesis [PATH:ko00550] Metabolism; Global and overview maps; Metabolic pathways [PATH:ko01100]
GM001107	99.7	0	lcz:LCAZH_0953	K03316	TC.CPA1	monovalent cation:H+ antiporter, CPA1 family	--
GM001108	100	7.2e-97	lce:LC2W_1160
GM001109	100	3.2e-205	lcb:LCABL_11710	K11072	potA	spermidine/putrescine transport system ATP-binding protein	3.6.3.31	Environmental Information Processing; Membrane transport; ABC transporters [PATH:ko02010]
GM001110	100	2.3e-144	lca:LSEI_1007	K11071	potB	spermidine/putrescine transport system permease protein	--	Environmental Information Processing; Membrane transport; ABC transporters [PATH:ko02010]
GM001111	99.6	2.7e-151	lcz:LCAZH_0957	K11070	potC	spermidine/putrescine transport system permease protein	--	Environmental Information Processing; Membrane transport; ABC transporters [PATH:ko02010]
GM001112	100	7.6e-207	lcs:LCBD_1155	K11069	potD	spermidine/putrescine transport system substrate-binding protein	--	Environmental Information Processing; Membrane transport; ABC transporters [PATH:ko02010]
GM001113	100	6e-11	lcz:LCAZH_0959
GM001114	95.3	1.1e-28	lcz:LCAZH_0960
GM001115	99.8	0	lcx:LCA12A_2303
GM001116	99.5	1.2e-111	lpap:LBPC_0950
GM001117	97.9	2.9e-204	lce:LC2W_1171	K01992	ABC-2.P	ABC-2 type transport system permease protein	--
GM001118	99.6	2.3e-130	lpap:LBPC_0952	K01990	ABC-2.A	ABC-2 type transport system ATP-binding protein	--
GM001119	94.6	1.8e-10	lce:LC2W_1173
GM001120	100	1.1e-155	lcz:LCAZH_0970	K18672	dacA	diadenylate cyclase	2.7.7.85
GM001121	99.7	1e-195	lcl:LOCK919_1172
GM001122	100	4.6e-257	lpi:LBPG_00798	K03431	glmM	phosphoglucosamine mutase	5.4.2.10	Metabolism; Carbohydrate metabolism; Amino sugar and nucleotide sugar metabolism [PATH:ko00520] Metabolism; Global and overview maps; Metabolic pathways [PATH:ko01100] Metabolism; Global and overview maps; Biosynthesis of antibiotics [PATH:ko01130]
GM001123	100	0	lca:LSEI_1019	K00820	glmS, GFPT	glucosamine---fructose-6-phosphate aminotransferase (isomerizing)	2.6.1.16	Metabolism; Amino acid metabolism; Alanine, aspartate and glutamate metabolism [PATH:ko00250] Metabolism; Carbohydrate metabolism; Amino sugar and nucleotide sugar metabolism [PATH:ko00520] Metabolism; Global and overview maps; Metabolic pathways [PATH:ko01100] Metabolism; Global and overview maps; Biosynthesis of antibiotics [PATH:ko01130] Human Diseases; Endocrine and metabolic diseases; Insuli…
GM001124	97.4	3.3e-15	lpq:AF91_08810
GM001125	99.8	0	lpap:LBPC_0957
GM001126	99.4	4.6e-84	lpap:LBPC_0958
GM001127	100	3.7e-136	lpq:AF91_08795
GM001128	100	2.7e-154	lce:LC2W_1182	K02243	comGA	competence protein ComGA	--
GM001129	99.4	1.4e-172	lcw:BN194_11620	K02244	comGB	competence protein ComGB	--
GM001130	100	9.5e-52	lcb:LCABL_11890	K02245	comGC	competence protein ComGC	--
GM001131	96.6	4.4e-76	lcb:LCABL_11900	K02246	comGD	competence protein ComGD	--
GM001132	98.1	1.7e-50	lcw:BN194_11650
GM001133	100	2.3e-68	lcx:LCA12A_2320	K02248	comGF	competence protein ComGF	--
GM001134	100	1e-53	lce:LC2W_1188
GM001135	99.7	7e-186	lce:LC2W_1189	K00571	E2.1.1.72	site-specific DNA-methyltransferase (adenine-specific)	2.1.1.72
GM001136	100	5.4e-77	lcx:LCA12A_2323
GM001137	99.8	1.1e-263	lcx:LCA12A_2324	K03293	TC.AAT	amino acid transporter, AAT family	--
GM001138	100	9.7e-148	lcw:BN194_11710
GM001139	100	3.1e-163	lcx:LCA12A_2326
GM001140	100	1.5e-182	lcx:LCA12A_2327
GM001141	100	5.3e-166	lcz:LCAZH_0991
GM001142	99.6	0	lpq:AF91_08715	K07407	E3.2.1.22B, galA, rafA	alpha-galactosidase	3.2.1.22	Metabolism; Carbohydrate metabolism; Galactose metabolism [PATH:ko00052] Metabolism; Lipid metabolism; Glycerolipid metabolism [PATH:ko00561] Metabolism; Lipid metabolism; Sphingolipid metabolism [PATH:ko00600] Metabolism; Glycan biosynthesis and metabolism; Glycosphingolipid biosynthesis - globo and isoglobo series [PATH:ko00603] Metabolism; Global and overview maps; Metabolic pathways [PATH:ko0…
GM001143	97.5	4.6e-12	lpq:AF91_08710
GM001144	100	2.2e-50	lcs:LCBD_1186
GM001145	98.7	6.2e-215	lrl:LC705_01060
GM001146	83	4.8e-92	lcb:LCABL_30800
GM001147	93.5	8.3e-41	lrl:LC705_01062
GM001148	100	4.3e-32	lpq:AF91_02660
GM001149	97.8	3e-18	lcs:LCBD_3102
GM001150	93.3	5.5e-25	lce:LC2W_3087
GM001151	96.9	5.9e-48	lcs:LCBD_3104
GM001152	95.2	1.8e-23	lcx:LCA12A_0576
GM001153	96.7	3.4e-154	lrl:LC705_00688
GM001154	97	5.6e-274	lrl:LC705_00689
GM001155	95	5.1e-74	lrg:LRHM_2787
GM001156	93.7	7.4e-52	lcs:LCBD_3108
GM001157	78.7	1.6e-19	lcb:LCABL_30900
GM001158	95.5	1.3e-71	lcw:BN194_30280
GM001159	96.2	6.5e-78	lcs:LCBD_3111
GM001160	90.9	6.5e-301	lcx:LCA12A_0583
GM001161	100	1.1e-21	lpi:LBPG_01498
GM001162	98.5	5.6e-219	lce:LC2W_3096
GM001163	97.3	1.5e-288	lcw:BN194_30330	K06904	K06904	uncharacterized protein	--
GM001164	100	6.3e-47	lce:LC2W_3098
GM001166	100	9.4e-17	lpap:LBPC_2820
GM001167	100	2.6e-38	lcb:LCABL_30980
GM001168	99.2	5.3e-67	lpap:LBPC_0977
GM001169	100	4.5e-134	lpq:AF91_08695
GM001170	100	3e-278	lpq:AF91_08690
GM001171	99.4	5.6e-94	lpi:LBPG_00772
GM001172	100	2.3e-35	lpi:LBPG_00771
GM001173	100	3.1e-83	lpi:LBPG_00770	K06209	pheB	chorismate mutase	5.4.99.5	Metabolism; Amino acid metabolism; Phenylalanine, tyrosine and tryptophan biosynthesis [PATH:ko00400] Metabolism; Global and overview maps; Metabolic pathways [PATH:ko01100] Metabolism; Global and overview maps; Biosynthesis of secondary metabolites [PATH:ko01110] Metabolism; Global and overview maps; Biosynthesis of antibiotics [PATH:ko01130] Metabolism; Global and overview maps; Biosynthesis of…
GM001174	100	9.7e-88	lcz:LCAZH_1025
GM001175	100	1.1e-55	lcz:LCAZH_1026
GM001176	99.8	6.1e-251	lpq:AF91_08660	K03502	umuC	DNA polymerase V	--
GM001177	100	3.7e-26	lca:LSEI_1050
GM001178	99.7	6.4e-231	lpap:LBPC_0987
GM001179	99.6	1.8e-144	lcx:LCA12A_2343	K10804	tesA	acyl-CoA thioesterase I	3.1.2.- 3.1.1.5	Metabolism; Lipid metabolism; Biosynthesis of unsaturated fatty acids [PATH:ko01040]
GM001180	100	1.3e-58	lcz:LCAZH_1031
GM001181	99.9	0	lpq:AF91_08635	K03657	uvrD, pcrA	DNA helicase II / ATP-dependent DNA helicase PcrA	3.6.4.12	Genetic Information Processing; Replication and repair; Nucleotide excision repair [PATH:ko03420] Genetic Information Processing; Replication and repair; Mismatch repair [PATH:ko03430]
GM001182	99.7	0	lpi:LBPG_00759	K01972	E6.5.1.2, ligA, ligB	DNA ligase (NAD+)	6.5.1.2	Genetic Information Processing; Replication and repair; DNA replication [PATH:ko03030] Genetic Information Processing; Replication and repair; Base excision repair [PATH:ko03410] Genetic Information Processing; Replication and repair; Nucleotide excision repair [PATH:ko03420] Genetic Information Processing; Replication and repair; Mismatch repair [PATH:ko03430]
GM001183	100	6.7e-217	lcz:LCAZH_1034
GM001184	100	3.2e-46	lcx:LCA12A_2348	K02435	gatC, GATC	aspartyl-tRNA(Asn)/glutamyl-tRNA(Gln) amidotransferase subunit C	6.3.5.6 6.3.5.7	Genetic Information Processing; Translation; Aminoacyl-tRNA biosynthesis [PATH:ko00970] Metabolism; Global and overview maps; Metabolic pathways [PATH:ko01100]
GM001185	99.8	6.3e-273	lcs:LCBD_1197	K02433	gatA, QRSL1	aspartyl-tRNA(Asn)/glutamyl-tRNA(Gln) amidotransferase subunit A	6.3.5.6 6.3.5.7	Genetic Information Processing; Translation; Aminoacyl-tRNA biosynthesis [PATH:ko00970] Metabolism; Global and overview maps; Metabolic pathways [PATH:ko01100]
GM001186	100	8.4e-278	lcs:LCBD_1198	K02434	gatB, PET112	aspartyl-tRNA(Asn)/glutamyl-tRNA(Gln) amidotransferase subunit B	6.3.5.6 6.3.5.7	Genetic Information Processing; Translation; Aminoacyl-tRNA biosynthesis [PATH:ko00970] Metabolism; Global and overview maps; Metabolic pathways [PATH:ko01100]
GM001187	100	1.1e-177	lcl:LOCK919_1217	K07029	dagK	diacylglycerol kinase (ATP)	2.7.1.107	Metabolism; Lipid metabolism; Glycerolipid metabolism [PATH:ko00561] Metabolism; Lipid metabolism; Glycerophospholipid metabolism [PATH:ko00564] Metabolism; Global and overview maps; Metabolic pathways [PATH:ko01100] Metabolism; Global and overview maps; Biosynthesis of secondary metabolites [PATH:ko01110]
GM001188	99.6	1.3e-259	lcb:LCABL_12260	K03215	rumA	23S rRNA (uracil1939-C5)-methyltransferase	2.1.1.190
GM001189	99.8	3.3e-227	lpq:AF91_08595
GM001190	99.6	1.4e-152	lpi:LBPG_00749
GM001191	99.7	1.3e-164	lce:LC2W_1226
GM001192	99.4	0	lcw:BN194_12030	K07386	pepO	putative endopeptidase	3.4.24.-
GM001193	60.3	3.1e-17	lpd:AYR62_15335
GM001194	99.7	1.1e-219	lcx:LCA12A_2357
GM001196	99.2	5.4e-68	lcw:BN194_12050
GM001197	100	7e-149	lpq:AF91_08565
GM001198	100	1.4e-164	lcx:LCA12A_2360
GM001199	100	1.1e-28	lcx:LCA12A_2361
GM001200	99.2	6.7e-138	lpap:LBPC_1008	K07273	acm	lysozyme	--
GM001201	100	1.1e-61	lcl:LOCK919_1230
GM001202	100	1.2e-60	lcx:LCA12A_2364
GM001203	100	4.3e-177	lcx:LCA12A_2365
GM001204	99.5	1.3e-242	lcl:LOCK919_1233
GM001205	100	8.1e-60	lcl:LOCK919_1234	K02759	PTS-Cel-EIIA, celC, chbA	PTS system, cellobiose-specific IIA component	2.7.1.196 2.7.1.205	Metabolism; Carbohydrate metabolism; Starch and sucrose metabolism [PATH:ko00500] Environmental Information Processing; Membrane transport; Phosphotransferase system (PTS) [PATH:ko02060]
GM001206	100	1.4e-71	lcz:LCAZH_1057
GM001207	99.6	1.1e-132	lcx:LCA12A_2369
GM001208	99.8	0	lce:LC2W_1243	K03654	recQ	ATP-dependent DNA helicase RecQ	3.6.4.12	Genetic Information Processing; Folding, sorting and degradation; RNA degradation [PATH:ko03018]
GM001209	99.8	1.3e-239	lcl:LOCK919_1240	K19689	ampS, pepS, ampT	aminopeptidase	3.4.11.-
GM001210	98.2	5.2e-22	lpq:AF91_08480
GM001211	100	7.5e-111	lca:LSEI_1084
GM001213	99.8	2.9e-259	lcb:LCABL_12480
GM001214	100	2.8e-187	lcb:LCABL_12490	K07058	K07058	membrane protein	--
GM001215	100	2.8e-81	lce:LC2W_1250
GM001216	99.6	1.5e-157	lcz:LCAZH_1068	K01265	map	methionyl aminopeptidase	3.4.11.18
GM001217	99.7	2.5e-202	lcx:LCA12A_2377
GM001218	100	6.5e-40	lcz:LCAZH_1070
GM001219	100	1.7e-30	lcz:LCAZH_1071
GM001220	99.7	5.3e-200	lpi:LBPG_00718	K00938	E2.7.4.2, mvaK2	phosphomevalonate kinase	2.7.4.2	Metabolism; Metabolism of terpenoids and polyketides; Terpenoid backbone biosynthesis [PATH:ko00900] Metabolism; Global and overview maps; Metabolic pathways [PATH:ko01100] Metabolism; Global and overview maps; Biosynthesis of secondary metabolites [PATH:ko01110] Metabolism; Global and overview maps; Biosynthesis of antibiotics [PATH:ko01130]
GM001221	98.4	1.7e-167	lcl:LOCK919_1250	K00963	UGP2, galU, galF	UTP--glucose-1-phosphate uridylyltransferase	2.7.7.9	Metabolism; Carbohydrate metabolism; Pentose and glucuronate interconversions [PATH:ko00040] Metabolism; Carbohydrate metabolism; Galactose metabolism [PATH:ko00052] Metabolism; Carbohydrate metabolism; Starch and sucrose metabolism [PATH:ko00500] Metabolism; Carbohydrate metabolism; Amino sugar and nucleotide sugar metabolism [PATH:ko00520] Metabolism; Global and overview maps; Metabolic pathway…
GM001223	100	1.5e-125	lpap:LBPC_2811
GM001225	100	1.5e-125	lpap:LBPC_0581
GM001228	100	1.5e-125	lpap:LBPC_0339
GM001230	82	1.2e-19	lpi:LBPG_00439
GM001231	77.9	5e-43	lcy:LC20004_05815	K07484	K07484	transposase	--
GM001232	77.8	1.3e-116	lcl:LOCK919_1253
GM001233	98.3	3.1e-25	lca:LSEI_1334
GM001234	99.7	1.9e-216	lpq:AF91_07645
GM001235	99	2.7e-284	lca:LSEI_1104	K01223	E3.2.1.86B, bglA	6-phospho-beta-glucosidase	3.2.1.86	Metabolism; Carbohydrate metabolism; Glycolysis / Gluconeogenesis [PATH:ko00010] Metabolism; Carbohydrate metabolism; Starch and sucrose metabolism [PATH:ko00500]
GM001236	99.5	0	lcs:LCBD_1244	K02755	PTS-Bgl-EIIA, bglF, bglP	PTS system, beta-glucoside-specific IIA component	2.7.1.-	Environmental Information Processing; Membrane transport; Phosphotransferase system (PTS) [PATH:ko02060]
GM001237	100	5.4e-152	lcl:LOCK919_1261	K03488	licT, bglG	beta-glucoside operon transcriptional antiterminator	--
GM001238	99.5	0	lpap:LBPC_1035
GM001239	99.1	0	lcz:LCAZH_1089
GM001240	99.4	3.1e-172	lcs:LCBD_1250
GM001241	99.1	5.7e-109	lpap:LBPC_1039
GM001242	100	4.9e-173	lpi:LBPG_00708
GM001243	98.6	2e-31	lca:LSEI_1113
GM001244	100	1.9e-31	lpq:AF91_08315	K03704	cspA	cold shock protein (beta-ribbon, CspA family)	--
GM001245	98.8	1.1e-83	lca:LSEI_1115
GM001246	98.6	1.3e-116	lcb:LCABL_12760
GM001247	100	3.7e-122	lcw:BN194_12490	K03816	xpt	xanthine phosphoribosyltransferase	2.4.2.22	Metabolism; Nucleotide metabolism; Purine metabolism [PATH:ko00230] Metabolism; Global and overview maps; Metabolic pathways [PATH:ko01100] Metabolism; Global and overview maps; Biosynthesis of secondary metabolites [PATH:ko01110]
GM001248	100	2.7e-246	lpap:LBPC_1045	K16169	pbuX	xanthine permease	--
GM001249	99.5	1.8e-203	lca:LSEI_1119	K01589	purK	5-(carboxyamino)imidazole ribonucleotide synthase	6.3.4.18	Metabolism; Nucleotide metabolism; Purine metabolism [PATH:ko00230] Metabolism; Global and overview maps; Metabolic pathways [PATH:ko01100] Metabolism; Global and overview maps; Biosynthesis of secondary metabolites [PATH:ko01110] Metabolism; Global and overview maps; Biosynthesis of antibiotics [PATH:ko01130]
GM001250	100	5.6e-241	lcz:LCAZH_1100	K01756	purB, ADSL	adenylosuccinate lyase	4.3.2.2	Metabolism; Nucleotide metabolism; Purine metabolism [PATH:ko00230] Metabolism; Amino acid metabolism; Alanine, aspartate and glutamate metabolism [PATH:ko00250] Metabolism; Global and overview maps; Metabolic pathways [PATH:ko01100] Metabolism; Global and overview maps; Biosynthesis of secondary metabolites [PATH:ko01110] Metabolism; Global and overview maps; Biosynthesis of antibiotics [PATH:ko…
GM001251	100	9.9e-105	lpi:LBPG_00698
GM001252	99.6	3.5e-134	lcx:LCA12A_0962
GM001253	99.9	0	lpi:LBPG_03057	K19005	ltaS	lipoteichoic acid synthase	2.7.8.20	Metabolism; Lipid metabolism; Glycerolipid metabolism [PATH:ko00561] Metabolism; Global and overview maps; Metabolic pathways [PATH:ko01100]
GM001254	99.5	1.8e-112	lcs:LCBD_1265
GM001255	100	1.4e-155	lca:LSEI_1125	K05340	glcU	glucose uptake protein	--
GM001256	100	5e-256	lcb:LCABL_12870	K01810	GPI, pgi	glucose-6-phosphate isomerase	5.3.1.9	Metabolism; Carbohydrate metabolism; Glycolysis / Gluconeogenesis [PATH:ko00010] Metabolism; Carbohydrate metabolism; Pentose phosphate pathway [PATH:ko00030] Metabolism; Carbohydrate metabolism; Starch and sucrose metabolism [PATH:ko00500] Metabolism; Carbohydrate metabolism; Amino sugar and nucleotide sugar metabolism [PATH:ko00520] Metabolism; Global and overview maps; Metabolic pathways [PATH…
GM001257	99.5	4.7e-226	lcs:LCBD_1269
GM001258	95.5	1.1e-31	lcx:LCA12A_0956
GM001259	98.6	1.3e-72	lpi:LBPG_00192
GM001261	100	3e-33	lrh:LGG_01091
GM001262	100	7.1e-143	lrh:LGG_01092
GM001264	96.1	6.3e-125	lrg:LRHM_1043
GM001267	45.3	4.3e-28	lrr:N134_06430
GM001268	56.1	3.5e-11	lbh:Lbuc_1451
GM001269	92.9	1.9e-41	vg:26624686
GM001273	44	8.9e-09	lpg:BB562_05320
GM001274	42.7	1.4e-10	lpl:lp_0634
GM001277	88.9	2.7e-115	lro:LOCK900_1060	K07741	antB	anti-repressor protein	--
GM001278	99.5	1.3e-99	lcs:LCBD_1283
GM001279	100	5.8e-37	vg:26624690
GM001280	100	3.2e-16	lcl:LOCK919_2498
GM001281	96.4	1.2e-72	vg:29056562
GM001282	97.6	1.6e-159	lcl:LOCK919_2496	K07455	recT	recombination protein RecT	--
GM001283	97.4	1.2e-154	lpq:AF91_04005
GM001284	98.2	3.4e-157	lcl:LOCK919_2494
GM001285	93.8	9.6e-135	lca:LSEI_1954
GM001286	97.2	1.1e-52	lca:LSEI_1953
GM001287	98.8	1.6e-38	lpq:AF91_04025
GM001288	99.2	2.2e-65	vg:26635282
GM001290	63	3.2e-54	lpap:LBPC_0783
GM001291	79.6	1.4e-16	lho:LOOC260_109690
GM001292	91.5	8.2e-26	lcl:LOCK919_2484
GM001293	93.8	1.3e-37	vg:17503459
GM001294	92.5	1.9e-19	vg:17503460
GM001295	94.4	1.8e-22	lpq:AF91_11105
GM001296	96.2	9.1e-21	vg:26624705
GM001297	98.6	2.8e-75	vg:17503465
GM001298	98	2.8e-234	lrl:LC705_00866
GM001300	93.3	5.9e-97	lpi:LBPG_03049	K07474	xtmA	phage terminase small subunit	--
GM001301	99.5	4.4e-246	lcb:LCABL_13240
GM001302	97.7	3e-267	vg:26624654
GM001303	97.6	1.8e-181	lpq:AF91_04135
GM001304	91.7	5.2e-50	vg:26633145
GM001305	80	4.5e-57	lca:LSEI_1930
GM001306	94.8	1.2e-111	lcx:LCA12A_0915
GM001307	96.2	1.2e-48	vg:26633147
GM001308	98.5	1.5e-188	vg:26628984
GM001309	67.7	3.1e-12	lec:LGMK_06900
GM001310	95.9	2.2e-60	lro:LOCK900_1089
GM001311	96	5.3e-49	lrg:LRHM_1077
GM001312	97.5	6.8e-59	lcl:LOCK919_2465
GM001313	97.8	1.6e-69	lpi:LBPG_00243
GM001314	92.5	1.4e-104	lrh:LGG_01134
GM001315	96.4	2.8e-51	lcs:LCBD_1315
GM001316	97.4	5.6e-58	vg:26624667
GM001317	45.7	2.9e-89	lbk:LVISKB_2140
GM001318	81	6.8e-285	lcl:LOCK919_2459
GM001319	72.8	0	lpi:LBPG_03050
GM001320	84.4	1.2e-46	vg:3726164
GM001321	93.6	1.6e-16	vg:3726165
GM001322	88.2	6.2e-45	lrh:LGG_01141
GM001323	96.6	1.3e-70	lpap:LBPC_1740
GM001324	81	4.6e-181	lro:LOCK900_1102
GM001325	76.1	1.1e-28	vg:29056543
GM001326	96.9	1.9e-138	lce:LC2W_1292
GM001327	100	9.5e-48	lce:LC2W_1293
GM001328	98.3	1.9e-89	lcz:LCAZH_1115
GM001329	100	3.6e-159	lpq:AF91_08230	K15051	endA	DNA-entry nuclease	--
GM001330	98.7	3.4e-112	lcz:LCAZH_1117
GM001331	99.5	1.5e-229	lpi:LBPG_00684
GM001332	100	2.8e-173	lcz:LCAZH_1121	K03810	mviM	virulence factor	--
GM001333	100	7.1e-85	lca:LSEI_1136	K01487	E3.5.4.3, guaD	guanine deaminase	3.5.4.3	Metabolism; Nucleotide metabolism; Purine metabolism [PATH:ko00230] Metabolism; Global and overview maps; Metabolic pathways [PATH:ko01100]
GM001334	96.5	1.5e-24	lcz:LCAZH_1124
GM001335	98.8	1.1e-83	lcl:LOCK919_1299	K05770	TSPO, BZRP	translocator protein	--	Environmental Information Processing; Signaling molecules and interaction; Neuroactive ligand-receptor interaction [PATH:ko04080] Cellular Processes; Cell growth and death; Apoptosis - fly [PATH:ko04214] Organismal Systems; Digestive system; Cholesterol metabolism [PATH:ko04979] Human Diseases; Infectious diseases: Viral; Human T-cell leukemia virus 1 infection [PATH:ko05166]
GM001336	100	2.7e-19	lce:LC2W_1306
GM001337	99.5	9.9e-224	lpi:LBPG_00677
GM001338	99.2	8.5e-130	lcw:BN194_13370
GM001339	100	2.4e-285	lcz:LCAZH_1130	K08659	pepDA, pepDB	dipeptidase	3.4.-.-
GM001340	98.4	7e-28	lca:LSEI_1144
GM001341	99.1	6.8e-56	lcz:LCAZH_1133
GM001342	100	1.4e-121	lca:LSEI_1146
GM001343	100	3.3e-120	lpap:LBPC_1071
GM001344	100	0	lcb:LCABL_13700	K06147	ABCB-BAC	ATP-binding cassette, subfamily B, bacterial	--
GM001345	100	0	lce:LC2W_1315	K06147	ABCB-BAC	ATP-binding cassette, subfamily B, bacterial	--
GM001346	99.2	6e-142	lca:LSEI_1150
GM001347	99	1.7e-162	lpq:AF91_08130	K07104	catE	catechol 2,3-dioxygenase	1.13.11.2	Metabolism; Xenobiotics biodegradation and metabolism; Chlorocyclohexane and chlorobenzene degradation [PATH:ko00361] Metabolism; Xenobiotics biodegradation and metabolism; Benzoate degradation [PATH:ko00362] Metabolism; Xenobiotics biodegradation and metabolism; Xylene degradation [PATH:ko00622] Metabolism; Xenobiotics biodegradation and metabolism; Styrene degradation [PATH:ko00643] Metabolism;…
GM001348	99.1	3.2e-202	lcs:LCBD_1351
GM001349	99.8	3.4e-260	lce:LC2W_1320	K01928	murE	UDP-N-acetylmuramoyl-L-alanyl-D-glutamate--2,6-diaminopimelate ligase	6.3.2.13	Metabolism; Amino acid metabolism; Lysine biosynthesis [PATH:ko00300] Metabolism; Glycan biosynthesis and metabolism; Peptidoglycan biosynthesis [PATH:ko00550]
GM001350	100	8.1e-110	lcz:LCAZH_1142	K00857	tdk, TK	thymidine kinase	2.7.1.21	Metabolism; Nucleotide metabolism; Pyrimidine metabolism [PATH:ko00240] Metabolism; Xenobiotics biodegradation and metabolism; Drug metabolism - other enzymes [PATH:ko00983] Metabolism; Global and overview maps; Metabolic pathways [PATH:ko01100]
GM001351	100	5.7e-202	lpi:LBPG_00663	K02835	prfA, MTRF1, MRF1	peptide chain release factor 1	--
GM001352	100	2.2e-153	lcs:LCBD_1355	K02493	hemK, prmC, HEMK	release factor glutamine methyltransferase	2.1.1.297
GM001353	99.1	1.1e-186	lpap:LBPC_1081	K07566	tsaC, rimN, SUA5	L-threonylcarbamoyladenylate synthase	2.7.7.87
GM001354	99.5	4.9e-234	lcb:LCABL_13800	K00600	glyA, SHMT	glycine hydroxymethyltransferase	2.1.2.1	Metabolism; Amino acid metabolism; Glycine, serine and threonine metabolism [PATH:ko00260] Metabolism; Metabolism of other amino acids; Cyanoamino acid metabolism [PATH:ko00460] Metabolism; Carbohydrate metabolism; Glyoxylate and dicarboxylate metabolism [PATH:ko00630] Metabolism; Metabolism of cofactors and vitamins; One carbon pool by folate [PATH:ko00670] Metabolism; Energy metabolism; Methane…
GM001355	100	1.4e-112	lpi:LBPG_00659	K00761	upp, UPRT	uracil phosphoribosyltransferase	2.4.2.9	Metabolism; Nucleotide metabolism; Pyrimidine metabolism [PATH:ko00240] Metabolism; Global and overview maps; Metabolic pathways [PATH:ko01100]
GM001356	96.2	4.2e-21	lcz:LCAZH_1148
GM001357	99.6	2.1e-128	lpi:LBPG_00658	K02108	ATPF0A, atpB	F-type H+-transporting ATPase subunit a	--	Metabolism; Energy metabolism; Oxidative phosphorylation [PATH:ko00190] Metabolism; Energy metabolism; Photosynthesis [PATH:ko00195] Metabolism; Global and overview maps; Metabolic pathways [PATH:ko01100]
GM001358	100	4.3e-29	lpap:LBPC_1086	K02110	ATPF0C, atpE	F-type H+-transporting ATPase subunit c	--	Metabolism; Energy metabolism; Oxidative phosphorylation [PATH:ko00190] Metabolism; Energy metabolism; Photosynthesis [PATH:ko00195] Metabolism; Global and overview maps; Metabolic pathways [PATH:ko01100]
GM001359	100	1.2e-82	lce:LC2W_1330	K02109	ATPF0B, atpF	F-type H+-transporting ATPase subunit b	--	Metabolism; Energy metabolism; Oxidative phosphorylation [PATH:ko00190] Metabolism; Energy metabolism; Photosynthesis [PATH:ko00195] Metabolism; Global and overview maps; Metabolic pathways [PATH:ko01100]
GM001360	100	3.2e-92	lcw:BN194_13590	K02113	ATPF1D, atpH	F-type H+-transporting ATPase subunit delta	--	Metabolism; Energy metabolism; Oxidative phosphorylation [PATH:ko00190] Metabolism; Energy metabolism; Photosynthesis [PATH:ko00195] Metabolism; Global and overview maps; Metabolic pathways [PATH:ko01100]
GM001361	100	4e-286	lpi:LBPG_00654	K02111	ATPF1A, atpA	F-type H+-transporting ATPase subunit alpha	7.1.2.2	Metabolism; Energy metabolism; Oxidative phosphorylation [PATH:ko00190] Metabolism; Energy metabolism; Photosynthesis [PATH:ko00195] Metabolism; Global and overview maps; Metabolic pathways [PATH:ko01100]
GM001362	100	1.1e-166	lcs:LCBD_1365	K02115	ATPF1G, atpG	F-type H+-transporting ATPase subunit gamma	--	Metabolism; Energy metabolism; Oxidative phosphorylation [PATH:ko00190] Metabolism; Energy metabolism; Photosynthesis [PATH:ko00195] Metabolism; Global and overview maps; Metabolic pathways [PATH:ko01100]
GM001363	100	9.5e-277	lcz:LCAZH_1155	K02112	ATPF1B, atpD	F-type H+-transporting ATPase subunit beta	7.1.2.2	Metabolism; Energy metabolism; Oxidative phosphorylation [PATH:ko00190] Metabolism; Energy metabolism; Photosynthesis [PATH:ko00195] Metabolism; Global and overview maps; Metabolic pathways [PATH:ko01100]
GM001364	99.3	2.2e-72	lcz:LCAZH_1156	K02114	ATPF1E, atpC	F-type H+-transporting ATPase subunit epsilon	--	Metabolism; Energy metabolism; Oxidative phosphorylation [PATH:ko00190] Metabolism; Energy metabolism; Photosynthesis [PATH:ko00195] Metabolism; Global and overview maps; Metabolic pathways [PATH:ko01100]
GM001365	100	8.4e-34	lcz:LCAZH_1157
GM001366	100	2.8e-179	lpap:LBPC_1094	K03569	mreB	rod shape-determining protein MreB and related proteins	--
GM001367	100	1.5e-24	lcl:LOCK919_1350
GM001368	100	3.2e-54	lcx:LCA12A_1387	K08998	K08998	uncharacterized protein	--
GM001369	100	1e-33	lcb:LCABL_13940
GM001370	99.8	8.8e-228	lcs:LCBD_1373	K05837	rodA, mrdB	rod shape determining protein RodA	--
GM001371	100	1.2e-48	lcs:LCBD_1374	K02437	gcvH, GCSH	glycine cleavage system H protein	--	Metabolism; Amino acid metabolism; Glycine, serine and threonine metabolism [PATH:ko00260] Metabolism; Carbohydrate metabolism; Glyoxylate and dicarboxylate metabolism [PATH:ko00630] Metabolism; Global and overview maps; Metabolic pathways [PATH:ko01100] Metabolism; Global and overview maps; Biosynthesis of secondary metabolites [PATH:ko01110] Metabolism; Global and overview maps; Biosynthesis of…
GM001372	100	3.7e-212	lcw:BN194_13710	K01439	dapE	succinyl-diaminopimelate desuccinylase	3.5.1.18	Metabolism; Amino acid metabolism; Lysine biosynthesis [PATH:ko00300] Metabolism; Global and overview maps; Metabolic pathways [PATH:ko01100] Metabolism; Global and overview maps; Microbial metabolism in diverse environments [PATH:ko01120] Metabolism; Global and overview maps; Biosynthesis of amino acids [PATH:ko01230]
GM001373	99.6	2.1e-151	lcs:LCBD_1376	K02073	metQ	D-methionine transport system substrate-binding protein	--	Environmental Information Processing; Membrane transport; ABC transporters [PATH:ko02010]
GM001374	100	1.4e-152	lca:LSEI_1177	K02073	metQ	D-methionine transport system substrate-binding protein	--	Environmental Information Processing; Membrane transport; ABC transporters [PATH:ko02010]
GM001375	100	2.6e-191	lpq:AF91_07995	K02071	metN	D-methionine transport system ATP-binding protein	--	Environmental Information Processing; Membrane transport; ABC transporters [PATH:ko02010]
GM001376	99.6	7e-121	lcz:LCAZH_1169	K02072	metI	D-methionine transport system permease protein	--	Environmental Information Processing; Membrane transport; ABC transporters [PATH:ko02010]
GM001377	99.6	4e-141	lce:LC2W_1348	K09013	sufC	Fe-S cluster assembly ATP-binding protein	--
GM001378	99.7	2.1e-190	lcb:LCABL_14030	K09015	sufD	Fe-S cluster assembly protein SufD	--
GM001379	100	2.8e-226	lcl:LOCK919_1364	K11717	sufS	cysteine desulfurase / selenocysteine lyase	2.8.1.7 4.4.1.16	Metabolism; Metabolism of other amino acids; Selenocompound metabolism [PATH:ko00450] Metabolism; Global and overview maps; Metabolic pathways [PATH:ko01100]
GM001380	100	9.5e-79	lpap:LBPC_1109	K04488	iscU, nifU	nitrogen fixation protein NifU and related proteins	--
GM001381	100	5.3e-280	lce:LC2W_1352	K09014	sufB	Fe-S cluster assembly protein SufB	--
GM001382	100	1.3e-26	lce:LC2W_1353
GM001384	100	1.8e-65	lcl:LOCK919_1368
GM001385	99.7	1.1e-180	lpq:AF91_07950
GM001386	99.1	1.7e-116	lpq:AF91_07945
GM001387	100	2.8e-162	lcs:LCBD_1389
GM001388	100	3.8e-84	lcz:LCAZH_1180
GM001389	100	4.6e-41	lca:LSEI_1192
GM001390	98.1	2.2e-21	lce:LC2W_1360
GM001391	100	1.6e-243	lcw:BN194_13900	K07478	ycaJ	putative ATPase	--
GM001392	99.5	0	lce:LC2W_1362	K01919	gshA	glutamate--cysteine ligase	6.3.2.2	Metabolism; Amino acid metabolism; Cysteine and methionine metabolism [PATH:ko00270] Metabolism; Metabolism of other amino acids; Glutathione metabolism [PATH:ko00480] Metabolism; Global and overview maps; Metabolic pathways [PATH:ko01100]
GM001393	99.3	8.8e-77	lcx:LCA12A_1410
GM001394	99.5	8.3e-110	lce:LC2W_1364
GM001395	100	6.1e-122	lcx:LCA12A_1412	K01752	E4.3.1.17, sdaA, sdaB, tdcG	L-serine dehydratase	4.3.1.17	Metabolism; Amino acid metabolism; Glycine, serine and threonine metabolism [PATH:ko00260] Metabolism; Amino acid metabolism; Cysteine and methionine metabolism [PATH:ko00270] Metabolism; Global and overview maps; Metabolic pathways [PATH:ko01100] Metabolism; Global and overview maps; Biosynthesis of secondary metabolites [PATH:ko01110] Metabolism; Global and overview maps; Biosynthesis of antibi…
GM001396	100	9.3e-155	lpap:LBPC_1124	K01752	E4.3.1.17, sdaA, sdaB, tdcG	L-serine dehydratase	4.3.1.17	Metabolism; Amino acid metabolism; Glycine, serine and threonine metabolism [PATH:ko00260] Metabolism; Amino acid metabolism; Cysteine and methionine metabolism [PATH:ko00270] Metabolism; Global and overview maps; Metabolic pathways [PATH:ko01100] Metabolism; Global and overview maps; Biosynthesis of secondary metabolites [PATH:ko01110] Metabolism; Global and overview maps; Biosynthesis of antibi…
GM001397	99.6	3.7e-122	lpi:LBPG_00618
GM001398	98.9	1.1e-155	lca:LSEI_1202	K07304	msrA	peptide-methionine (S)-S-oxide reductase	1.8.4.11
GM001399	99.7	1.9e-166	lcl:LOCK919_1382
GM001400	100	2.3e-132	lcb:LCABL_14230	K03811	pnuC	nicotinamide mononucleotide transporter	--
GM001401	99.6	9.9e-134	lpap:LBPC_1129
GM001402	99.6	4.2e-157	lpap:LBPC_1130	K04486	E3.1.3.15B	histidinol-phosphatase (PHP family)	3.1.3.15	Metabolism; Amino acid metabolism; Histidine metabolism [PATH:ko00340] Metabolism; Global and overview maps; Metabolic pathways [PATH:ko01100] Metabolism; Global and overview maps; Biosynthesis of secondary metabolites [PATH:ko01110] Metabolism; Global and overview maps; Biosynthesis of amino acids [PATH:ko01230]
GM001404	98.7	0	lcw:BN194_14020	K15580	oppA, mppA	oligopeptide transport system substrate-binding protein	--	Human Diseases; Drug resistance: Antimicrobial; beta-Lactam resistance [PATH:ko01501] Environmental Information Processing; Membrane transport; ABC transporters [PATH:ko02010] Cellular Processes; Cellular community - prokaryotes; Quorum sensing [PATH:ko02024]
GM001405	99.3	5.6e-163	lce:LC2W_1374
GM001406	100	6.2e-122	lpi:LBPG_00607
GM001407	100	6.4e-170	lcl:LOCK919_1391	K01990	ABC-2.A	ABC-2 type transport system ATP-binding protein	--
GM001408	99.6	1.5e-135	lcb:LCABL_14300	K01992	ABC-2.P	ABC-2 type transport system permease protein	--
GM001409	99.3	3.7e-159	lpq:AF91_07835
GM001410	100	8.3e-77	lcw:BN194_14080
GM001411	100	2.6e-54	lcw:BN194_14090	K01607	pcaC	4-carboxymuconolactone decarboxylase	4.1.1.44	Metabolism; Xenobiotics biodegradation and metabolism; Benzoate degradation [PATH:ko00362] Metabolism; Global and overview maps; Metabolic pathways [PATH:ko01100] Metabolism; Global and overview maps; Microbial metabolism in diverse environments [PATH:ko01120] Metabolism; Global and overview maps; Degradation of aromatic compounds [PATH:ko01220]
GM001412	100	2.8e-116	lcw:BN194_14100
GM001413	100	5.7e-45	lcb:LCABL_14350
GM001414	100	4.9e-121	lpap:LBPC_1142	K00799	GST, gst	glutathione S-transferase	2.5.1.18	Metabolism; Metabolism of other amino acids; Glutathione metabolism [PATH:ko00480] Metabolism; Xenobiotics biodegradation and metabolism; Metabolism of xenobiotics by cytochrome P450 [PATH:ko00980] Metabolism; Xenobiotics biodegradation and metabolism; Drug metabolism - cytochrome P450 [PATH:ko00982] Metabolism; Xenobiotics biodegradation and metabolism; Drug metabolism - other enzymes [PATH:ko00…
GM001415	96.2	1.8e-111	lpap:LBPC_1143
GM001416	97.6	4.9e-165	lpap:LBPC_1144
GM001417	98.7	5.9e-87	lcx:LCA12A_1435
GM001418	100	2.6e-25	lcb:LCABL_14410
GM001419	98.9	1.3e-153	lcw:BN194_14170
GM001420	100	2.8e-105	lcb:LCABL_14430	K07693	desR	two-component system, NarL family, response regulator DesR	--	Environmental Information Processing; Signal transduction; Two-component system [PATH:ko02020]
GM001421	100	3.2e-194	lcx:LCA12A_1439	K07778	desK	two-component system, NarL family, sensor histidine kinase DesK	2.7.13.3	Environmental Information Processing; Signal transduction; Two-component system [PATH:ko02020]
GM001422	100	4.1e-138	lcb:LCABL_14450	K01992	ABC-2.P	ABC-2 type transport system permease protein	--
GM001423	99	5.3e-161	lcw:BN194_14210	K01990	ABC-2.A	ABC-2 type transport system ATP-binding protein	--
GM001424	96.2	6.8e-245	lcw:BN194_14220
GM001425	96.3	1.2e-64	lca:LSEI_1228
GM001426	98.1	1.4e-50	lpap:LBPC_1158
GM001427	95.7	8.6e-110	lcs:LCBD_1428
GM001428	100	6e-122	lpap:LBPC_1168
GM001429	100	1.1e-42	lcw:BN194_14270	K07473	dinJ	DNA-damage-inducible protein J	--
GM001430	97	3.1e-49	lcw:BN194_14280	K19157	yafQ	mRNA interferase YafQ	3.1.-.-
GM001431	96.2	1.3e-22	lcs:LCBD_1432
GM001432	98.7	4e-124	lpq:AF91_07680
GM001433	98.9	0	lpap:LBPC_1172	K06959	tex	protein Tex	--
GM001434	83.8	5.7e-81	lcz:LCAZH_1224
GM001436	88.4	4.4e-297	lcb:LCABL_14670
GM001437	100	6.2e-26	lca:LSEI_1334
GM001438	99.7	1.9e-216	lpq:AF91_07645
GM001439	100	1.5e-111	lcl:LOCK919_1422	K02986	RP-S4, rpsD	small subunit ribosomal protein S4	--	Genetic Information Processing; Translation; Ribosome [PATH:ko03010]
GM001440	100	8.7e-86	lpi:LBPG_00583	K08968	msrC	L-methionine (R)-S-oxide reductase	1.8.4.14	Metabolism; Amino acid metabolism; Cysteine and methionine metabolism [PATH:ko00270]
GM001441	99.6	0	lcx:LCA12A_1450	K06286	ezrA	septation ring formation regulator	--
GM001442	99.5	6.3e-215	lpap:LBPC_1180	K04487	iscS, NFS1	cysteine desulfurase	2.8.1.7	Metabolism; Metabolism of cofactors and vitamins; Thiamine metabolism [PATH:ko00730] Metabolism; Global and overview maps; Metabolic pathways [PATH:ko01100] Genetic Information Processing; Folding, sorting and degradation; Sulfur relay system [PATH:ko04122]
GM001443	99.5	5.7e-227	lcl:LOCK919_1426	K03151	thiI	tRNA uracil 4-sulfurtransferase	2.8.1.4	Metabolism; Metabolism of cofactors and vitamins; Thiamine metabolism [PATH:ko00730] Metabolism; Global and overview maps; Metabolic pathways [PATH:ko01100] Genetic Information Processing; Folding, sorting and degradation; Sulfur relay system [PATH:ko04122]
GM001444	98	1.2e-19	lpq:AF91_07615
GM001445	99.5	1.9e-115	lca:LSEI_1250	K01926	rex	redox-sensing transcriptional repressor	--
GM001446	100	5.8e-20	lcl:LOCK919_1429
GM001447	99.8	0	lca:LSEI_1251	K01873	VARS, valS	valyl-tRNA synthetase	6.1.1.9	Genetic Information Processing; Translation; Aminoacyl-tRNA biosynthesis [PATH:ko00970]
GM001448	99.3	2.5e-241	lce:LC2W_1429	K11754	folC	dihydrofolate synthase / folylpolyglutamate synthase	6.3.2.12 6.3.2.17	Metabolism; Metabolism of cofactors and vitamins; Folate biosynthesis [PATH:ko00790] Metabolism; Global and overview maps; Metabolic pathways [PATH:ko01100]
GM001449	99.5	8.2e-116	lcl:LOCK919_1432
GM001450	100	1.1e-118	lcs:LCBD_1461	K03630	radC	DNA repair protein RadC	--
GM001451	99.7	1.8e-181	lcx:LCA12A_1458	K03569	mreB	rod shape-determining protein MreB and related proteins	--
GM001452	99.7	2.3e-153	lpi:LBPG_00571	K03570	mreC	rod shape-determining protein MreC	--
GM001453	100	1.3e-95	lca:LSEI_1257	K03571	mreD	rod shape-determining protein MreD	--
GM001454	99.5	2.9e-116	lpq:AF91_07570	K03610	minC	septum site-determining protein MinC	--
GM001455	100	7.5e-143	lcw:BN194_14590	K03609	minD	septum site-determining protein MinD	--
GM001456	100	3.6e-23	lpap:LBPC_1192
GM001457	100	1.6e-114	lcl:LOCK919_1440	K02029	ABC.PA.P	polar amino acid transport system permease protein	--
GM001458	100	5e-113	lcx:LCA12A_1464	K02028	ABC.PA.A	polar amino acid transport system ATP-binding protein	7.4.2.1
GM001459	100	4.5e-151	lcb:LCABL_14920	K02030	ABC.PA.S	polar amino acid transport system substrate-binding protein	--
GM001460	100	9e-272	lpq:AF91_07540	K06131	clsA_B	cardiolipin synthase A/B	2.7.8.-	Metabolism; Lipid metabolism; Glycerophospholipid metabolism [PATH:ko00564] Metabolism; Global and overview maps; Metabolic pathways [PATH:ko01100]
GM001462	100	6.9e-58	lce:LC2W_1442
GM001464	100	3.2e-76	lcs:LCBD_1473	K03925	mraZ	MraZ protein	--
GM001465	100	7e-172	lpq:AF91_07520	K03438	mraW, rsmH	16S rRNA (cytosine1402-N4)-methyltransferase	2.1.1.199
GM001466	100	1.3e-27	lcx:LCA12A_1471
GM001467	100	0	lcl:LOCK919_1449	K08724	pbpB	penicillin-binding protein 2B	--	Metabolism; Glycan biosynthesis and metabolism; Peptidoglycan biosynthesis [PATH:ko00550]
GM001468	100	2.8e-184	lce:LC2W_1447	K01000	mraY	phospho-N-acetylmuramoyl-pentapeptide-transferase	2.7.8.13	Metabolism; Glycan biosynthesis and metabolism; Peptidoglycan biosynthesis [PATH:ko00550] Metabolism; Global and overview maps; Metabolic pathways [PATH:ko01100] Human Diseases; Drug resistance: Antimicrobial; Vancomycin resistance [PATH:ko01502]
GM001469	99.8	3.3e-263	lcx:LCA12A_1474	K01925	murD	UDP-N-acetylmuramoylalanine--D-glutamate ligase	6.3.2.9	Metabolism; Metabolism of other amino acids; D-Glutamine and D-glutamate metabolism [PATH:ko00471] Metabolism; Glycan biosynthesis and metabolism; Peptidoglycan biosynthesis [PATH:ko00550] Metabolism; Global and overview maps; Metabolic pathways [PATH:ko01100]
GM001470	100	2.2e-201	lpap:LBPC_1204	K02563	murG	UDP-N-acetylglucosamine--N-acetylmuramyl-(pentapeptide) pyrophosphoryl-undecaprenol N-acetylglucosamine transferase	2.4.1.227	Metabolism; Glycan biosynthesis and metabolism; Peptidoglycan biosynthesis [PATH:ko00550] Metabolism; Global and overview maps; Metabolic pathways [PATH:ko01100] Human Diseases; Drug resistance: Antimicrobial; Vancomycin resistance [PATH:ko01502] Cellular Processes; Cell growth and death; Cell cycle - Caulobacter [PATH:ko04112]
GM001471	99.3	1.8e-158	lcb:LCABL_15030	K03589	ftsQ	cell division protein FtsQ	--	Cellular Processes; Cell growth and death; Cell cycle - Caulobacter [PATH:ko04112]
GM001472	100	2.9e-248	lcl:LOCK919_1455	K03590	ftsA	cell division protein FtsA	--	Cellular Processes; Cell growth and death; Cell cycle - Caulobacter [PATH:ko04112]
GM001473	100	5.9e-235	lca:LSEI_1275	K03531	ftsZ	cell division protein FtsZ	--	Cellular Processes; Cell growth and death; Cell cycle - Caulobacter [PATH:ko04112]
GM001474	99.3	7.4e-79	lcx:LCA12A_1479	K09772	sepF	cell division inhibitor SepF	--
GM001475	99	2.8e-47	lcl:LOCK919_1458	K02221	yggT	YggT family protein	--
GM001476	100	4.6e-145	lca:LSEI_1278
GM001477	100	2.6e-140	lca:LSEI_1279	K04074	divIVA	cell division initiation protein	--
GM001478	99.7	0	lcs:LCBD_1487	K01870	IARS, ileS	isoleucyl-tRNA synthetase	6.1.1.5	Genetic Information Processing; Translation; Aminoacyl-tRNA biosynthesis [PATH:ko00970]
GM001479	100	2.4e-35	lcw:BN194_14820	K03704	cspA	cold shock protein (beta-ribbon, CspA family)	--
GM001480	100	1.4e-164	lcw:BN194_14830	K02040	pstS	phosphate transport system substrate-binding protein	--	Environmental Information Processing; Membrane transport; ABC transporters [PATH:ko02010] Environmental Information Processing; Signal transduction; Two-component system [PATH:ko02020] Human Diseases; Infectious diseases: Bacterial; Tuberculosis [PATH:ko05152]
GM001481	99.6	9.6e-277	lpi:LBPG_00544
GM001482	99.8	2.3e-220	lce:LC2W_1456
GM001483	100	1.2e-108	lca:LSEI_1285
GM001484	98.3	9.6e-94	lcx:LCA12A_1489	K01515	nudF	ADP-ribose pyrophosphatase	3.6.1.13	Metabolism; Nucleotide metabolism; Purine metabolism [PATH:ko00230]
GM001485	98.8	5.1e-40	lcx:LCA12A_1490
GM001486	99.6	1.3e-119	lpq:AF91_07415	K01243	mtnN, mtn, pfs	adenosylhomocysteine nucleosidase	3.2.2.9	Metabolism; Amino acid metabolism; Cysteine and methionine metabolism [PATH:ko00270] Metabolism; Global and overview maps; Metabolic pathways [PATH:ko01100] Metabolism; Global and overview maps; Biosynthesis of amino acids [PATH:ko01230]
GM001487	99.7	1.6e-218	lpap:LBPC_1221	K04487	iscS, NFS1	cysteine desulfurase	2.8.1.7	Metabolism; Metabolism of cofactors and vitamins; Thiamine metabolism [PATH:ko00730] Metabolism; Global and overview maps; Metabolic pathways [PATH:ko01100] Genetic Information Processing; Folding, sorting and degradation; Sulfur relay system [PATH:ko04122]
GM001488	100	3.5e-57	lpq:AF91_07405
GM001489	99.9	0	lcz:LCAZH_1283
GM001490	99.7	4.4e-221	lcx:LCA12A_1495	K00566	mnmA, trmU	tRNA-uridine 2-sulfurtransferase	2.8.1.13	Genetic Information Processing; Folding, sorting and degradation; Sulfur relay system [PATH:ko04122]
GM001491	99.5	2.1e-122	lcz:LCAZH_1288
GM001492	99.5	4.1e-118	lcb:LCABL_15250
GM001493	99.9	0	lcl:LOCK919_1480	K03581	recD	exodeoxyribonuclease V alpha subunit	3.1.11.5	Genetic Information Processing; Replication and repair; Homologous recombination [PATH:ko03440]
GM001494	99.8	2.6e-243	lcx:LCA12A_1499
GM001495	100	1.3e-181	lpq:AF91_07370
GM001496	100	0	lpap:LBPC_1231	K12574	rnj	ribonuclease J	3.1.-.-	Genetic Information Processing; Folding, sorting and degradation; RNA degradation [PATH:ko03018]
GM001497	100	1.2e-31	lcb:LCABL_15300
GM001498	99.3	2.4e-77	lpq:AF91_07355
GM001499	97.9	1.1e-46	lca:LSEI_1301
GM001500	100	7.7e-99	lcs:LCBD_1511	K01462	PDF, def	peptide deformylase	3.5.1.88
GM001501	100	7.7e-143	lcw:BN194_15070
GM001502	100	4.3e-213	lpi:LBPG_00521	K00161	PDHA, pdhA	pyruvate dehydrogenase E1 component alpha subunit	1.2.4.1	Metabolism; Carbohydrate metabolism; Glycolysis / Gluconeogenesis [PATH:ko00010] Metabolism; Carbohydrate metabolism; Citrate cycle (TCA cycle) [PATH:ko00020] Metabolism; Carbohydrate metabolism; Pyruvate metabolism [PATH:ko00620] Metabolism; Global and overview maps; Metabolic pathways [PATH:ko01100] Metabolism; Global and overview maps; Biosynthesis of secondary metabolites [PATH:ko01110] Metab…
GM001503	100	3.8e-181	lpi:LBPG_00520	K00162	PDHB, pdhB	pyruvate dehydrogenase E1 component beta subunit	1.2.4.1	Metabolism; Carbohydrate metabolism; Glycolysis / Gluconeogenesis [PATH:ko00010] Metabolism; Carbohydrate metabolism; Citrate cycle (TCA cycle) [PATH:ko00020] Metabolism; Carbohydrate metabolism; Pyruvate metabolism [PATH:ko00620] Metabolism; Global and overview maps; Metabolic pathways [PATH:ko01100] Metabolism; Global and overview maps; Biosynthesis of secondary metabolites [PATH:ko01110] Metab…
GM001504	99.8	0	lpap:LBPC_1239	K00627	DLAT, aceF, pdhC	pyruvate dehydrogenase E2 component (dihydrolipoamide acetyltransferase)	2.3.1.12	Metabolism; Carbohydrate metabolism; Glycolysis / Gluconeogenesis [PATH:ko00010] Metabolism; Carbohydrate metabolism; Citrate cycle (TCA cycle) [PATH:ko00020] Metabolism; Carbohydrate metabolism; Pyruvate metabolism [PATH:ko00620] Metabolism; Global and overview maps; Metabolic pathways [PATH:ko01100] Metabolism; Global and overview maps; Biosynthesis of secondary metabolites [PATH:ko01110] Metab…
GM001505	99.8	6.3e-262	lpap:LBPC_1240	K00382	DLD, lpd, pdhD	dihydrolipoamide dehydrogenase	1.8.1.4	Metabolism; Carbohydrate metabolism; Glycolysis / Gluconeogenesis [PATH:ko00010] Metabolism; Carbohydrate metabolism; Citrate cycle (TCA cycle) [PATH:ko00020] Metabolism; Amino acid metabolism; Glycine, serine and threonine metabolism [PATH:ko00260] Metabolism; Amino acid metabolism; Valine, leucine and isoleucine degradation [PATH:ko00280] Metabolism; Carbohydrate metabolism; Pyruvate metabolism…
GM001506	100	1.7e-159	lcx:LCA12A_1511
GM001507	100	3.9e-46	lcz:LCAZH_1304
GM001508	100	1.2e-145	lcs:LCBD_1519	K01092	E3.1.3.25, IMPA, suhB	myo-inositol-1(or 4)-monophosphatase	3.1.3.25	Metabolism; Biosynthesis of other secondary metabolites; Streptomycin biosynthesis [PATH:ko00521] Metabolism; Carbohydrate metabolism; Inositol phosphate metabolism [PATH:ko00562] Metabolism; Global and overview maps; Metabolic pathways [PATH:ko01100] Environmental Information Processing; Signal transduction; Phosphatidylinositol signaling system [PATH:ko04070]
GM001509	99.8	0	lcb:LCABL_15430	K06207	typA, bipA	GTP-binding protein	--
GM001510	99.7	1.9e-216	lpq:AF91_05200
GM001511	100	6.2e-26	lca:LSEI_1334
GM001512	100	2.5e-205	lpi:LBPG_00513	K03588	ftsW, spoVE	cell division protein FtsW	--	Cellular Processes; Cell growth and death; Cell cycle - Caulobacter [PATH:ko04112]
GM001513	99.8	0	lpap:LBPC_1247	K01958	PC, pyc	pyruvate carboxylase	6.4.1.1	Metabolism; Carbohydrate metabolism; Citrate cycle (TCA cycle) [PATH:ko00020] Metabolism; Carbohydrate metabolism; Pyruvate metabolism [PATH:ko00620] Metabolism; Energy metabolism; Carbon fixation pathways in prokaryotes [PATH:ko00720] Metabolism; Global and overview maps; Metabolic pathways [PATH:ko01100] Metabolism; Global and overview maps; Microbial metabolism in diverse environments [PATH:ko…
GM001514	98.4	2.8e-63	lcb:LCABL_15460
GM001515	100	7.3e-100	lca:LSEI_1317
GM001516	99.4	1.4e-86	lpi:LBPG_00509	K00954	E2.7.7.3A, coaD, kdtB	pantetheine-phosphate adenylyltransferase	2.7.7.3	Metabolism; Metabolism of cofactors and vitamins; Pantothenate and CoA biosynthesis [PATH:ko00770] Metabolism; Global and overview maps; Metabolic pathways [PATH:ko01100]
GM001517	99.4	1.2e-199	lpap:LBPC_1251	K07177	K07177	Lon-like protease	--	Cellular Processes; Cellular community - prokaryotes; Quorum sensing [PATH:ko02024]
GM001518	100	3.9e-124	lpi:LBPG_00507	K02237	comEA	competence protein ComEA	--
GM001519	99.5	0	lcx:LCA12A_1522	K02238	comEC	competence protein ComEC	--
GM001520	100	8.8e-192	lcl:LOCK919_1505	K02340	holA	DNA polymerase III subunit delta	2.7.7.7	Metabolism; Nucleotide metabolism; Purine metabolism [PATH:ko00230] Metabolism; Nucleotide metabolism; Pyrimidine metabolism [PATH:ko00240] Metabolism; Global and overview maps; Metabolic pathways [PATH:ko01100] Genetic Information Processing; Replication and repair; DNA replication [PATH:ko03030] Genetic Information Processing; Replication and repair; Mismatch repair [PATH:ko03430] Genetic Infor…
GM001521	100	2.3e-37	lcs:LCBD_1530	K02968	RP-S20, rpsT	small subunit ribosomal protein S20	--	Genetic Information Processing; Translation; Ribosome [PATH:ko03010]
GM001522	100	3.9e-43	lcx:LCA12A_1525	K02956	RP-S15, MRPS15, rpsO	small subunit ribosomal protein S15	--	Genetic Information Processing; Translation; Ribosome [PATH:ko03010]
GM001523	99.6	6.5e-125	lce:LC2W_1498
GM001524	100	0	lcs:LCBD_1533	K12574	rnj	ribonuclease J	3.1.-.-	Genetic Information Processing; Folding, sorting and degradation; RNA degradation [PATH:ko03018]
GM001525	100	6.5e-167	lpap:LBPC_1259
GM001526	100	1.4e-225	lpi:LBPG_00499	K02358	tuf, TUFM	elongation factor Tu	--
GM001528	79.2	1e-22	lrg:LRHM_1289
GM001529	81.2	1.4e-66	lro:LOCK900_1314
GM001530	81.7	1.8e-111	lrh:LGG_01347
GM001531	96	5.1e-60	lro:LOCK900_1316	K01607	pcaC	4-carboxymuconolactone decarboxylase	4.1.1.44	Metabolism; Xenobiotics biodegradation and metabolism; Benzoate degradation [PATH:ko00362] Metabolism; Global and overview maps; Metabolic pathways [PATH:ko01100] Metabolism; Global and overview maps; Microbial metabolism in diverse environments [PATH:ko01120] Metabolism; Global and overview maps; Degradation of aromatic compounds [PATH:ko01220]
GM001532	89.8	1e-57	lrl:LC705_01362
GM001533	95.8	2.4e-303	lcx:LCA12A_1530	K11085	msbA	ATP-binding cassette, subfamily B, bacterial MsbA	3.6.3.-	Environmental Information Processing; Membrane transport; ABC transporters [PATH:ko02010]
GM001534	100	1.1e-250	lpi:LBPG_00497	K03545	tig	trigger factor	--
GM001535	100	9.4e-233	lcb:LCABL_15610	K03544	clpX, CLPX	ATP-dependent Clp protease ATP-binding subunit ClpX	--	Cellular Processes; Cell growth and death; Cell cycle - Caulobacter [PATH:ko04112]
GM001536	99	1.2e-105	lcb:LCABL_15620	K03978	engB	GTP-binding protein	--
GM001537	100	9.6e-48	lcb:LCABL_15630
GM001538	100	7.7e-23	lcl:LOCK919_1518
GM001539	100	2.3e-267	lcb:LCABL_15650	K02029	ABC.PA.P	polar amino acid transport system permease protein	--
GM001540	100	9.2e-135	lpq:AF91_07165	K02028	ABC.PA.A	polar amino acid transport system ATP-binding protein	7.4.2.1
GM001541	100	0	lcl:LOCK919_1521	K03703	uvrC	excinuclease ABC subunit C	--	Genetic Information Processing; Replication and repair; Nucleotide excision repair [PATH:ko03420]
GM001542	100	0	lcb:LCABL_15690	K02768	PTS-Fru-EIIA, fruB	PTS system, fructose-specific IIA component	2.7.1.202	Metabolism; Carbohydrate metabolism; Fructose and mannose metabolism [PATH:ko00051] Metabolism; Global and overview maps; Metabolic pathways [PATH:ko01100] Metabolism; Global and overview maps; Microbial metabolism in diverse environments [PATH:ko01120] Environmental Information Processing; Membrane transport; Phosphotransferase system (PTS) [PATH:ko02060]
GM001543	99.7	6.3e-170	lca:LSEI_1348	K00882	fruK	1-phosphofructokinase	2.7.1.56	Metabolism; Carbohydrate metabolism; Fructose and mannose metabolism [PATH:ko00051]
GM001544	99.6	2.5e-132	lcl:LOCK919_1525	K03436	fruR2, fruR	DeoR family transcriptional regulator, fructose operon transcriptional repressor	--
GM001545	100	6.5e-245	lcx:LCA12A_1542	K03979	obgE, cgtA	GTPase	3.6.5.-
GM001546	100	0	lpq:AF91_07135
GM001547	99.7	1.1e-180	lcs:LCBD_1552	K00784	rnz	ribonuclease Z	3.1.26.11	Genetic Information Processing; Translation; RNA transport [PATH:ko03013]
GM001548	100	4.1e-144	lcs:LCBD_1553	K07124	K07124	uncharacterized protein	--
GM001549	100	3e-53	lce:LC2W_1519
GM001550	100	0	lcl:LOCK919_1531	K03695	clpB	ATP-dependent Clp protease ATP-binding subunit ClpB	--	Organismal Systems; Aging; Longevity regulating pathway - multiple species [PATH:ko04213]
GM001551	100	1.5e-28	lcx:LCA12A_1548	K02911	RP-L32, MRPL32, rpmF	large subunit ribosomal protein L32	--	Genetic Information Processing; Translation; Ribosome [PATH:ko03010]
GM001552	100	1.6e-96	lcs:LCBD_1558
GM001553	100	6.9e-302	lcx:LCA12A_1550	K01119	cpdB	2',3'-cyclic-nucleotide 2'-phosphodiesterase / 3'-nucleotidase	3.1.4.16 3.1.3.6	Metabolism; Nucleotide metabolism; Purine metabolism [PATH:ko00230] Metabolism; Nucleotide metabolism; Pyrimidine metabolism [PATH:ko00240]
GM001554	100	6.3e-162	lpi:LBPG_00475
GM001555	100	6.7e-29	lcx:LCA12A_1552
GM001556	99.9	0	lpq:AF91_07070	K02337	dnaE	DNA polymerase III subunit alpha	2.7.7.7	Metabolism; Nucleotide metabolism; Purine metabolism [PATH:ko00230] Metabolism; Nucleotide metabolism; Pyrimidine metabolism [PATH:ko00240] Metabolism; Global and overview maps; Metabolic pathways [PATH:ko01100] Genetic Information Processing; Replication and repair; DNA replication [PATH:ko03030] Genetic Information Processing; Replication and repair; Mismatch repair [PATH:ko03430] Genetic Infor…
GM001557	100	1.5e-177	lcl:LOCK919_1538	K00850	pfkA, PFK	6-phosphofructokinase 1	2.7.1.11	Metabolism; Carbohydrate metabolism; Glycolysis / Gluconeogenesis [PATH:ko00010] Metabolism; Carbohydrate metabolism; Pentose phosphate pathway [PATH:ko00030] Metabolism; Carbohydrate metabolism; Fructose and mannose metabolism [PATH:ko00051] Metabolism; Carbohydrate metabolism; Galactose metabolism [PATH:ko00052] Metabolism; Energy metabolism; Methane metabolism [PATH:ko00680] Metabolism; Global…
GM001558	100	0	lpi:LBPG_00471	K00873	PK, pyk	pyruvate kinase	2.7.1.40	Metabolism; Carbohydrate metabolism; Glycolysis / Gluconeogenesis [PATH:ko00010] Metabolism; Nucleotide metabolism; Purine metabolism [PATH:ko00230] Metabolism; Carbohydrate metabolism; Pyruvate metabolism [PATH:ko00620] Metabolism; Global and overview maps; Metabolic pathways [PATH:ko01100] Metabolism; Global and overview maps; Biosynthesis of secondary metabolites [PATH:ko01110] Metabolism; Glo…
GM001559	99.7	1.9e-216	lpq:AF91_05200
GM001560	98.3	3.1e-25	lca:LSEI_1334
GM001561	99.3	1.2e-76	lcl:LOCK919_1540
GM001562	100	6.1e-162	lcz:LCAZH_1354	K00243	K00243	uncharacterized protein	--
GM001563	100	3.8e-164	lpq:AF91_07045	K04763	xerD	integrase/recombinase XerD	--
GM001564	100	5.5e-67	lcx:LCA12A_1559	K02859	ribT	riboflavin biosynthesis RibT protein	--
GM001565	99.6	5.6e-129	lca:LSEI_1370	K05896	scpA	segregation and condensation protein A	--
GM001566	100	2.9e-110	lcx:LCA12A_1561	K06024	scpB	segregation and condensation protein B	--
GM001567	100	1.7e-136	lpq:AF91_07025	K06178	rluB	23S rRNA pseudouridine2605 synthase	5.4.99.22
GM001568	100	4.4e-100	lcb:LCABL_15930
GM001569	100	5.1e-32	lcs:LCBD_1573	K05337	fer	ferredoxin	--
GM001570	99.1	1.6e-182	lpap:LBPC_1297
GM001571	99.1	6.8e-264	lca:LSEI_1376	K03654	recQ	ATP-dependent DNA helicase RecQ	3.6.4.12	Genetic Information Processing; Folding, sorting and degradation; RNA degradation [PATH:ko03018]
GM001572	100	3.6e-108	lcx:LCA12A_1567
GM001573	100	1.3e-116	lcw:BN194_15710	K00945	cmk	CMP/dCMP kinase	2.7.4.25	Metabolism; Nucleotide metabolism; Pyrimidine metabolism [PATH:ko00240] Metabolism; Global and overview maps; Metabolic pathways [PATH:ko01100]
GM001574	99.8	1.7e-245	lce:LC2W_1543	K02945	RP-S1, rpsA	small subunit ribosomal protein S1	--	Genetic Information Processing; Translation; Ribosome [PATH:ko03010]
GM001575	100	1.5e-244	lcz:LCAZH_1367	K03977	engA, der	GTPase	--
GM001576	100	2.4e-43	lpi:LBPG_00455	K03530	hupB	DNA-binding protein HU-beta	--
GM001577	100	1.2e-238	lcs:LCBD_1581
GM001578	100	1.3e-156	lce:LC2W_1547
GM001579	100	8.4e-223	lcw:BN194_15770	K00974	cca	tRNA nucleotidyltransferase (CCA-adding enzyme)	2.7.7.72 3.1.3.- 3.1.4.-	Genetic Information Processing; Translation; RNA transport [PATH:ko03013]
GM001580	100	1.3e-83	lcb:LCABL_16050
GM001581	99.8	0	lcw:BN194_15790	K15738	uup	ABC transport system ATP-binding/permease protein	--
GM001582	99.7	2.5e-188	lca:LSEI_1387	K00560	thyA, TYMS	thymidylate synthase	2.1.1.45	Metabolism; Nucleotide metabolism; Pyrimidine metabolism [PATH:ko00240] Metabolism; Metabolism of cofactors and vitamins; One carbon pool by folate [PATH:ko00670] Metabolism; Global and overview maps; Metabolic pathways [PATH:ko01100] Human Diseases; Drug resistance: Antineoplastic; Antifolate resistance [PATH:ko01523]
GM001583	99.4	3.5e-90	lca:LSEI_1388	K00287	DHFR, folA	dihydrofolate reductase	1.5.1.3	Metabolism; Metabolism of cofactors and vitamins; One carbon pool by folate [PATH:ko00670] Metabolism; Metabolism of cofactors and vitamins; Folate biosynthesis [PATH:ko00790] Metabolism; Global and overview maps; Metabolic pathways [PATH:ko01100] Human Diseases; Drug resistance: Antineoplastic; Antifolate resistance [PATH:ko01523]
GM001584	99.5	5.5e-120	lcs:LCBD_1588	K11068	hlyIII	hemolysin III	--
GM001585	100	4.3e-149	lcz:LCAZH_1377
GM001586	100	8.2e-156	lcl:LOCK919_1565
GM001587	99.5	1.2e-114	lcz:LCAZH_1379
GM001588	98.7	2.3e-86	lcx:LCA12A_1583	K07304	msrA	peptide-methionine (S)-S-oxide reductase	1.8.4.11
GM001589	100	4.7e-40	lcz:LCAZH_1381
GM001590	99.6	1.8e-253	lca:LSEI_1395	K03797	E3.4.21.102, prc, ctpA	carboxyl-terminal processing protease	3.4.21.102
GM001591	81	5.4e-44	lcb:LCABL_16160
GM001592	53.2	5e-176	lro:LOCK900_1377
GM001593	53.5	2.2e-177	lro:LOCK900_1377
GM001594	54.3	1e-218	lro:LOCK900_1378
GM001595	45.1	1.3e-31	lrh:LGG_00392
GM001596	99.1	9.5e-191	lcs:LCBD_1597	K00134	GAPDH, gapA	glyceraldehyde 3-phosphate dehydrogenase	1.2.1.12	Metabolism; Carbohydrate metabolism; Glycolysis / Gluconeogenesis [PATH:ko00010] Metabolism; Energy metabolism; Carbon fixation in photosynthetic organisms [PATH:ko00710] Metabolism; Global and overview maps; Metabolic pathways [PATH:ko01100] Metabolism; Global and overview maps; Biosynthesis of secondary metabolites [PATH:ko01110] Metabolism; Global and overview maps; Microbial metabolism in div…
GM001597	94.3	1e-139	lcw:BN194_15920
GM001598	99.7	1.2e-159	lpq:AF91_06900	K14540	rbgA	ribosome biogenesis GTPase A	--
GM001599	99.6	2.8e-139	lpq:AF91_06895	K03470	rnhB	ribonuclease HII	3.1.26.4	Genetic Information Processing; Replication and repair; DNA replication [PATH:ko03030]
GM001600	98.9	1.3e-145	lcl:LOCK919_1573	K04096	smf	DNA processing protein	--
GM001601	97.1	2.5e-09	lpq:AF91_06880
GM001602	100	0	lpq:AF91_06875	K03168	topA	DNA topoisomerase I	5.99.1.2
GM001603	99.5	8.9e-250	lpi:LBPG_00427	K04094	trmFO, gid	methylenetetrahydrofolate--tRNA-(uracil-5-)-methyltransferase	2.1.1.74
GM001604	100	3.1e-169	lcs:LCBD_1605	K03733	xerC	integrase/recombinase XerC	--
GM001605	100	3.1e-92	lcb:LCABL_16280	K01419	hslV, clpQ	ATP-dependent HslUV protease, peptidase subunit HslV	3.4.25.2
GM001606	100	6.4e-262	lcl:LOCK919_1578	K03667	hslU	ATP-dependent HslUV protease ATP-binding subunit HslU	--
GM001607	100	1.9e-171	lcz:LCAZH_1392
GM001608	100	3.5e-102	lcw:BN194_16030	K08591	plsY	glycerol-3-phosphate acyltransferase PlsY	2.3.1.15	Metabolism; Lipid metabolism; Glycerolipid metabolism [PATH:ko00561] Metabolism; Lipid metabolism; Glycerophospholipid metabolism [PATH:ko00564] Metabolism; Global and overview maps; Metabolic pathways [PATH:ko01100] Metabolism; Global and overview maps; Biosynthesis of secondary metabolites [PATH:ko01110]
GM001609	100	0	lcx:LCA12A_1604	K02622	parE	topoisomerase IV subunit B	5.99.1.-
GM001610	99.9	0	lcs:LCBD_1611	K02621	parC	topoisomerase IV subunit A	5.99.1.-
GM001611	100	0	lcw:BN194_16080	K00656	E2.3.1.54, pflD	formate C-acetyltransferase	2.3.1.54	Metabolism; Carbohydrate metabolism; Pyruvate metabolism [PATH:ko00620] Metabolism; Carbohydrate metabolism; Propanoate metabolism [PATH:ko00640] Metabolism; Carbohydrate metabolism; Butanoate metabolism [PATH:ko00650] Metabolism; Global and overview maps; Metabolic pathways [PATH:ko01100] Metabolism; Global and overview maps; Microbial metabolism in diverse environments [PATH:ko01120]
GM001612	99.6	1.8e-166	lcl:LOCK919_1585	K04069	pflA, pflC, pflE	pyruvate formate lyase activating enzyme	1.97.1.4
GM001613	100	1.3e-181	lpap:LBPC_1335
GM001614	100	1.5e-171	lpi:LBPG_00415	K15986	ppaC	manganese-dependent inorganic pyrophosphatase	3.6.1.1	Metabolism; Energy metabolism; Oxidative phosphorylation [PATH:ko00190]
GM001616	98.1	6.4e-22	lcz:LCAZH_1402
GM001617	99.7	9.3e-205	lca:LSEI_1415
GM001618	99.2	1.9e-61	lcw:BN194_16140
GM001619	99.8	0	lcx:LCA12A_1612	K02004	ABC.CD.P	putative ABC transport system permease protein	--
GM001620	100	1.2e-137	lce:LC2W_1588	K02003	ABC.CD.A	putative ABC transport system ATP-binding protein	--
GM001621	99.7	4.6e-179	lcz:LCAZH_1407
GM001622	99.6	2e-123	lca:LSEI_1420
GM001623	99	1.4e-222	lcb:LCABL_16440	K08217	mef	MFS transporter, DHA3 family, macrolide efflux protein	--
GM001624	99.2	2.5e-67	lpap:LBPC_1345
GM001625	93.2	5.3e-65	lpi:LBPG_00406
GM001627	98.6	1.3e-110	lcx:LCA12A_1619
GM001628	99.2	5.3e-203	lca:LSEI_1426	K00817	hisC	histidinol-phosphate aminotransferase	2.6.1.9	Metabolism; Amino acid metabolism; Histidine metabolism [PATH:ko00340] Metabolism; Amino acid metabolism; Tyrosine metabolism [PATH:ko00350] Metabolism; Amino acid metabolism; Phenylalanine metabolism [PATH:ko00360] Metabolism; Amino acid metabolism; Phenylalanine, tyrosine and tryptophan biosynthesis [PATH:ko00400] Metabolism; Biosynthesis of other secondary metabolites; Novobiocin biosynthesis …
GM001629	99.1	5.1e-53	lpi:LBPG_00402	K01523	hisE	phosphoribosyl-ATP pyrophosphohydrolase	3.6.1.31	Metabolism; Amino acid metabolism; Histidine metabolism [PATH:ko00340] Metabolism; Global and overview maps; Metabolic pathways [PATH:ko01100] Metabolism; Global and overview maps; Biosynthesis of secondary metabolites [PATH:ko01110] Metabolism; Global and overview maps; Biosynthesis of amino acids [PATH:ko01230]
GM001630	100	4.8e-59	lpap:LBPC_1351	K01496	hisI	phosphoribosyl-AMP cyclohydrolase	3.5.4.19	Metabolism; Amino acid metabolism; Histidine metabolism [PATH:ko00340] Metabolism; Global and overview maps; Metabolic pathways [PATH:ko01100] Metabolism; Global and overview maps; Biosynthesis of secondary metabolites [PATH:ko01110] Metabolism; Global and overview maps; Biosynthesis of amino acids [PATH:ko01230]
GM001631	100	1.2e-134	lpi:LBPG_00400	K02500	hisF	imidazole glycerol-phosphate synthase subunit HisF	4.3.2.10	Metabolism; Amino acid metabolism; Histidine metabolism [PATH:ko00340] Metabolism; Global and overview maps; Metabolic pathways [PATH:ko01100] Metabolism; Global and overview maps; Biosynthesis of secondary metabolites [PATH:ko01110] Metabolism; Global and overview maps; Biosynthesis of amino acids [PATH:ko01230]
GM001632	100	2e-126	lcl:LOCK919_1605	K01814	hisA	phosphoribosylformimino-5-aminoimidazole carboxamide ribotide isomerase	5.3.1.16	Metabolism; Amino acid metabolism; Histidine metabolism [PATH:ko00340] Metabolism; Global and overview maps; Metabolic pathways [PATH:ko01100] Metabolism; Global and overview maps; Biosynthesis of secondary metabolites [PATH:ko01110] Metabolism; Global and overview maps; Biosynthesis of amino acids [PATH:ko01230]
GM001633	100	4.9e-113	lce:LC2W_1601	K02501	hisH	imidazole glycerol-phosphate synthase subunit HisH	4.3.2.10	Metabolism; Amino acid metabolism; Histidine metabolism [PATH:ko00340] Metabolism; Global and overview maps; Metabolic pathways [PATH:ko01100] Metabolism; Global and overview maps; Biosynthesis of secondary metabolites [PATH:ko01110] Metabolism; Global and overview maps; Biosynthesis of amino acids [PATH:ko01230]
GM001634	100	1.7e-104	lce:LC2W_1602	K01693	hisB	imidazoleglycerol-phosphate dehydratase	4.2.1.19	Metabolism; Amino acid metabolism; Histidine metabolism [PATH:ko00340] Metabolism; Global and overview maps; Metabolic pathways [PATH:ko01100] Metabolism; Global and overview maps; Biosynthesis of secondary metabolites [PATH:ko01110] Metabolism; Global and overview maps; Biosynthesis of amino acids [PATH:ko01230]
GM001635	99.3	1.8e-234	lce:LC2W_1603	K00013	hisD	histidinol dehydrogenase	1.1.1.23	Metabolism; Amino acid metabolism; Histidine metabolism [PATH:ko00340] Metabolism; Global and overview maps; Metabolic pathways [PATH:ko01100] Metabolism; Global and overview maps; Biosynthesis of secondary metabolites [PATH:ko01110] Metabolism; Global and overview maps; Biosynthesis of amino acids [PATH:ko01230]
GM001636	100	3.4e-64	lpq:AF91_06715	K00765	hisG	ATP phosphoribosyltransferase	2.4.2.17	Metabolism; Amino acid metabolism; Histidine metabolism [PATH:ko00340] Metabolism; Global and overview maps; Metabolic pathways [PATH:ko01100] Metabolism; Global and overview maps; Biosynthesis of secondary metabolites [PATH:ko01110] Metabolism; Global and overview maps; Biosynthesis of amino acids [PATH:ko01230]
GM001638	99.7	1.3e-217	lcz:LCAZH_1423	K02502	hisZ	ATP phosphoribosyltransferase regulatory subunit	--	Metabolism; Amino acid metabolism; Histidine metabolism [PATH:ko00340] Metabolism; Global and overview maps; Metabolic pathways [PATH:ko01100] Metabolism; Global and overview maps; Biosynthesis of secondary metabolites [PATH:ko01110] Metabolism; Global and overview maps; Biosynthesis of amino acids [PATH:ko01230]
GM001639	98.7	9.2e-225	lcw:BN194_16310	K00817	hisC	histidinol-phosphate aminotransferase	2.6.1.9	Metabolism; Amino acid metabolism; Histidine metabolism [PATH:ko00340] Metabolism; Amino acid metabolism; Tyrosine metabolism [PATH:ko00350] Metabolism; Amino acid metabolism; Phenylalanine metabolism [PATH:ko00360] Metabolism; Amino acid metabolism; Phenylalanine, tyrosine and tryptophan biosynthesis [PATH:ko00400] Metabolism; Biosynthesis of other secondary metabolites; Novobiocin biosynthesis …
GM001640	99.5	2.5e-100	lpap:LBPC_1360	K01515	nudF	ADP-ribose pyrophosphatase	3.6.1.13	Metabolism; Nucleotide metabolism; Purine metabolism [PATH:ko00230]
GM001641	100	1.9e-160	lcz:LCAZH_1426
GM001642	100	0	lcx:LCA12A_1633
GM001643	99	3.4e-51	lpap:LBPC_1363
GM001644	99.7	6.2e-207	lca:LSEI_1441	K07035	K07035	uncharacterized protein	--
GM001645	99.4	2.9e-178	lce:LC2W_1612	K00077	panE, apbA	2-dehydropantoate 2-reductase	1.1.1.169	Metabolism; Metabolism of cofactors and vitamins; Pantothenate and CoA biosynthesis [PATH:ko00770] Metabolism; Global and overview maps; Metabolic pathways [PATH:ko01100] Metabolism; Global and overview maps; Biosynthesis of secondary metabolites [PATH:ko01110]
GM001646	99.8	7.4e-252	lcw:BN194_16380	K09699	DBT, bkdB	2-oxoisovalerate dehydrogenase E2 component (dihydrolipoyl transacylase)	2.3.1.168	Metabolism; Amino acid metabolism; Valine, leucine and isoleucine degradation [PATH:ko00280] Metabolism; Carbohydrate metabolism; Propanoate metabolism [PATH:ko00640] Metabolism; Global and overview maps; Metabolic pathways [PATH:ko01100] Metabolism; Global and overview maps; Biosynthesis of secondary metabolites [PATH:ko01110] Metabolism; Global and overview maps; Biosynthesis of antibiotics [PA…
GM001647	100	9.2e-183	lca:LSEI_1444	K00167	BCKDHB, bkdA2	2-oxoisovalerate dehydrogenase E1 component beta subunit	1.2.4.4	Metabolism; Amino acid metabolism; Valine, leucine and isoleucine degradation [PATH:ko00280] Metabolism; Carbohydrate metabolism; Propanoate metabolism [PATH:ko00640] Metabolism; Global and overview maps; Metabolic pathways [PATH:ko01100] Metabolism; Global and overview maps; Biosynthesis of secondary metabolites [PATH:ko01110] Metabolism; Global and overview maps; Biosynthesis of antibiotics [PA…
GM001648	100	1.8e-189	lcx:LCA12A_1639	K00166	BCKDHA, bkdA1	2-oxoisovalerate dehydrogenase E1 component alpha subunit	1.2.4.4	Metabolism; Amino acid metabolism; Valine, leucine and isoleucine degradation [PATH:ko00280] Metabolism; Carbohydrate metabolism; Propanoate metabolism [PATH:ko00640] Metabolism; Global and overview maps; Metabolic pathways [PATH:ko01100] Metabolism; Global and overview maps; Biosynthesis of secondary metabolites [PATH:ko01110] Metabolism; Global and overview maps; Biosynthesis of antibiotics [PA…
GM001649	99.8	2.6e-263	lcl:LOCK919_1621	K00382	DLD, lpd, pdhD	dihydrolipoamide dehydrogenase	1.8.1.4	Metabolism; Carbohydrate metabolism; Glycolysis / Gluconeogenesis [PATH:ko00010] Metabolism; Carbohydrate metabolism; Citrate cycle (TCA cycle) [PATH:ko00020] Metabolism; Amino acid metabolism; Glycine, serine and threonine metabolism [PATH:ko00260] Metabolism; Amino acid metabolism; Valine, leucine and isoleucine degradation [PATH:ko00280] Metabolism; Carbohydrate metabolism; Pyruvate metabolism…
GM001650	99.7	3.3e-205	lca:LSEI_1447	K00929	buk	butyrate kinase	2.7.2.7	Metabolism; Carbohydrate metabolism; Butanoate metabolism [PATH:ko00650] Metabolism; Global and overview maps; Metabolic pathways [PATH:ko01100]
GM001651	99.3	6.4e-159	lpi:LBPG_00381	K00634	ptb	phosphate butyryltransferase	2.3.1.19	Metabolism; Carbohydrate metabolism; Butanoate metabolism [PATH:ko00650] Metabolism; Global and overview maps; Metabolic pathways [PATH:ko01100]
GM001652	99.5	1.5e-114	lca:LSEI_1449	K00762	pyrE	orotate phosphoribosyltransferase	2.4.2.10	Metabolism; Nucleotide metabolism; Pyrimidine metabolism [PATH:ko00240] Metabolism; Global and overview maps; Metabolic pathways [PATH:ko01100]
GM001653	100	5.6e-129	lcb:LCABL_16730	K01591	pyrF	orotidine-5'-phosphate decarboxylase	4.1.1.23	Metabolism; Nucleotide metabolism; Pyrimidine metabolism [PATH:ko00240] Metabolism; Global and overview maps; Metabolic pathways [PATH:ko01100]
GM001654	99.7	6.9e-158	lpap:LBPC_1374	K17828	pyrDI	dihydroorotate dehydrogenase (NAD+) catalytic subunit	1.3.1.14	Metabolism; Nucleotide metabolism; Pyrimidine metabolism [PATH:ko00240] Metabolism; Global and overview maps; Metabolic pathways [PATH:ko01100]
GM001655	99.9	0	lcz:LCAZH_1441	K01955	carB, CPA2	carbamoyl-phosphate synthase large subunit	6.3.5.5	Metabolism; Nucleotide metabolism; Pyrimidine metabolism [PATH:ko00240] Metabolism; Amino acid metabolism; Alanine, aspartate and glutamate metabolism [PATH:ko00250] Metabolism; Global and overview maps; Metabolic pathways [PATH:ko01100]
GM001656	100	6.9e-208	lcb:LCABL_16760	K01956	carA, CPA1	carbamoyl-phosphate synthase small subunit	6.3.5.5	Metabolism; Nucleotide metabolism; Pyrimidine metabolism [PATH:ko00240] Metabolism; Amino acid metabolism; Alanine, aspartate and glutamate metabolism [PATH:ko00250] Metabolism; Global and overview maps; Metabolic pathways [PATH:ko01100]
GM001657	99.3	9.8e-238	lcl:LOCK919_1629	K01465	URA4, pyrC	dihydroorotase	3.5.2.3	Metabolism; Nucleotide metabolism; Pyrimidine metabolism [PATH:ko00240] Metabolism; Global and overview maps; Metabolic pathways [PATH:ko01100]
GM001658	100	2.2e-178	lpap:LBPC_1378	K00609	pyrB, PYR2	aspartate carbamoyltransferase catalytic subunit	2.1.3.2	Metabolism; Nucleotide metabolism; Pyrimidine metabolism [PATH:ko00240] Metabolism; Amino acid metabolism; Alanine, aspartate and glutamate metabolism [PATH:ko00250] Metabolism; Global and overview maps; Metabolic pathways [PATH:ko01100]
GM001659	100	4e-242	lcl:LOCK919_1631	K02824	pyrP, uraA	uracil permease	--
GM001660	100	2.1e-96	lce:LC2W_1628	K02825	pyrR	pyrimidine operon attenuation protein / uracil phosphoribosyltransferase	2.4.2.9	Metabolism; Nucleotide metabolism; Pyrimidine metabolism [PATH:ko00240] Metabolism; Global and overview maps; Metabolic pathways [PATH:ko01100]
GM001661	99.7	7.3e-174	lce:LC2W_1629	K06180	rluD	23S rRNA pseudouridine1911/1915/1917 synthase	5.4.99.23
GM001662	99.4	3.3e-82	lcz:LCAZH_1448	K03101	lspA	signal peptidase II	3.4.23.36	Genetic Information Processing; Folding, sorting and degradation; Protein export [PATH:ko03060]
GM001663	100	0	lca:LSEI_1460	K01938	fhs	formate--tetrahydrofolate ligase	6.3.4.3	Metabolism; Metabolism of cofactors and vitamins; One carbon pool by folate [PATH:ko00670] Metabolism; Energy metabolism; Carbon fixation pathways in prokaryotes [PATH:ko00720] Metabolism; Global and overview maps; Metabolic pathways [PATH:ko01100] Metabolism; Global and overview maps; Microbial metabolism in diverse environments [PATH:ko01120] Metabolism; Global and overview maps; Carbon metabol…
GM001664	99.1	6.2e-54	lcs:LCBD_1665
GM001665	100	8e-69	lcz:LCAZH_1451	K03469	rnhA, RNASEH1	ribonuclease HI	3.1.26.4	Genetic Information Processing; Replication and repair; DNA replication [PATH:ko03030]
GM001666	99.5	4.8e-110	lcx:LCA12A_1657	K07078	K07078	uncharacterized protein	--
GM001667	97.6	7.8e-15	lcs:LCBD_1668
GM001668	100	5.2e-283	lpap:LBPC_1388	K06131	clsA_B	cardiolipin synthase A/B	2.7.8.-	Metabolism; Lipid metabolism; Glycerophospholipid metabolism [PATH:ko00564] Metabolism; Global and overview maps; Metabolic pathways [PATH:ko01100]
GM001669	100	6.3e-56	lcx:LCA12A_1659
GM001670	100	6.8e-275	lca:LSEI_1466
GM001672	100	2.6e-27	lce:LC2W_1639	K06191	nrdH	glutaredoxin-like protein NrdH	--
GM001673	99.9	0	lcl:LOCK919_1644	K00525	E1.17.4.1A, nrdA, nrdE	ribonucleoside-diphosphate reductase alpha chain	1.17.4.1	Metabolism; Nucleotide metabolism; Purine metabolism [PATH:ko00230] Metabolism; Nucleotide metabolism; Pyrimidine metabolism [PATH:ko00240] Metabolism; Global and overview maps; Metabolic pathways [PATH:ko01100]
GM001674	100	5.3e-191	lpap:LBPC_1393	K00526	E1.17.4.1B, nrdB, nrdF	ribonucleoside-diphosphate reductase beta chain	1.17.4.1	Metabolism; Nucleotide metabolism; Purine metabolism [PATH:ko00230] Metabolism; Nucleotide metabolism; Pyrimidine metabolism [PATH:ko00240] Metabolism; Global and overview maps; Metabolic pathways [PATH:ko01100]
GM001675	94.6	2.8e-11	lce:LC2W_1642
GM001676	100	1.5e-163	lcl:LOCK919_1647
GM001677	99.8	0	lpi:LBPG_00358	K07386	pepO	putative endopeptidase	3.4.24.-
GM001678	100	6.7e-195	lpq:AF91_06510	K03800	lplA, lplJ	lipoate---protein ligase	6.3.1.20	Metabolism; Metabolism of cofactors and vitamins; Lipoic acid metabolism [PATH:ko00785] Metabolism; Global and overview maps; Metabolic pathways [PATH:ko01100]
GM001679	99.4	3.3e-82	lpap:LBPC_0170
GM001680	100	2.3e-34	lpq:AF91_06505
GM001681	100	3.3e-174	lcw:BN194_16660
GM001682	99.5	8.6e-217	lcs:LCBD_1680	K07444	ypsC	putative N6-adenine-specific DNA methylase	2.1.1.-
GM001683	94.6	6.1e-21	lcw:BN194_16680
GM001684	100	1e-68	lcl:LOCK919_1654
GM001685	99.5	1.4e-106	lcx:LCA12A_0817
GM001686	100	2e-119	lcb:LCABL_17020	K03700	recU	recombination protein U	--
GM001687	99.7	0	lca:LSEI_1481	K05366	mrcA	penicillin-binding protein 1A	2.4.1.129 3.4.16.4	Metabolism; Glycan biosynthesis and metabolism; Peptidoglycan biosynthesis [PATH:ko00550] Metabolism; Global and overview maps; Metabolic pathways [PATH:ko01100] Human Diseases; Drug resistance: Antimicrobial; beta-Lactam resistance [PATH:ko01501]
GM001688	100	2e-84	lce:LC2W_1654	K01493	comEB	dCMP deaminase	3.5.4.12	Metabolism; Nucleotide metabolism; Pyrimidine metabolism [PATH:ko00240] Metabolism; Global and overview maps; Metabolic pathways [PATH:ko01100]
GM001689	100	1.8e-124	lcw:BN194_16740	K10773	NTH	endonuclease III	4.2.99.18	Genetic Information Processing; Replication and repair; Base excision repair [PATH:ko03410]
GM001690	100	5.7e-114	lcl:LOCK919_1660	K02086	dnaD	DNA replication protein	--
GM001691	100	3.7e-256	lpq:AF91_06450	K01893	NARS, asnS	asparaginyl-tRNA synthetase	6.1.1.22	Genetic Information Processing; Translation; Aminoacyl-tRNA biosynthesis [PATH:ko00970]
GM001692	99.7	1.9e-219	lcx:LCA12A_0824
GM001693	100	2.3e-86	lca:LSEI_1487
GM001694	90.9	2.4e-13	lcz:LCAZH_1479
GM001695	99.8	0	lpap:LBPC_1410	K03722	dinG	ATP-dependent DNA helicase DinG	3.6.4.12
GM001696	99.6	0	lpap:LBPC_1411	K16898	addA	ATP-dependent helicase/nuclease subunit A	3.1.-.- 3.6.4.12
GM001697	99.8	0	lcl:LOCK919_1667	K16899	addB	ATP-dependent helicase/nuclease subunit B	3.1.-.- 3.6.4.12
GM001698	99.7	5e-170	lcl:LOCK919_1668	K00869	E2.7.1.36, MVK, mvaK1	mevalonate kinase	2.7.1.36	Metabolism; Metabolism of terpenoids and polyketides; Terpenoid backbone biosynthesis [PATH:ko00900] Metabolism; Global and overview maps; Metabolic pathways [PATH:ko01100] Metabolism; Global and overview maps; Biosynthesis of secondary metabolites [PATH:ko01110] Metabolism; Global and overview maps; Biosynthesis of antibiotics [PATH:ko01130] Cellular Processes; Transport and catabolism; Peroxiso…
GM001699	99.7	2.5e-183	lcx:LCA12A_0830	K01597	MVD, mvaD	diphosphomevalonate decarboxylase	4.1.1.33	Metabolism; Metabolism of terpenoids and polyketides; Terpenoid backbone biosynthesis [PATH:ko00900] Metabolism; Global and overview maps; Metabolic pathways [PATH:ko01100] Metabolism; Global and overview maps; Biosynthesis of secondary metabolites [PATH:ko01110] Metabolism; Global and overview maps; Biosynthesis of antibiotics [PATH:ko01130]
GM001700	99.1	1.6e-193	lca:LSEI_1493	K01823	idi, IDI	isopentenyl-diphosphate Delta-isomerase	5.3.3.2	Metabolism; Metabolism of terpenoids and polyketides; Terpenoid backbone biosynthesis [PATH:ko00900] Metabolism; Global and overview maps; Metabolic pathways [PATH:ko01100] Metabolism; Global and overview maps; Biosynthesis of secondary metabolites [PATH:ko01110] Metabolism; Global and overview maps; Biosynthesis of antibiotics [PATH:ko01130]
GM001701	99.3	6.6e-261	lca:LSEI_1494
GM001702	99.7	1e-178	lcw:BN194_16860
GM001703	100	9.1e-143	lcx:LCA12A_0834
GM001704	99.2	1.5e-67	lcw:BN194_16880
GM001705	100	5.1e-26	lcx:LCA12A_0836	K01821	praC, xylH	4-oxalocrotonate tautomerase	5.3.2.6	Metabolism; Xenobiotics biodegradation and metabolism; Benzoate degradation [PATH:ko00362] Metabolism; Xenobiotics biodegradation and metabolism; Dioxin degradation [PATH:ko00621] Metabolism; Xenobiotics biodegradation and metabolism; Xylene degradation [PATH:ko00622] Metabolism; Global and overview maps; Metabolic pathways [PATH:ko01100] Metabolism; Global and overview maps; Microbial metabolism…
GM001706	100	3.1e-149	lcw:BN194_16900
GM001707	100	3.6e-128	lpi:LBPG_00331	K06967	trmK	tRNA (adenine22-N1)-methyltransferase	2.1.1.217
GM001708	100	1.6e-232	lpap:LBPC_1424	K03086	rpoD	RNA polymerase primary sigma factor	--
GM001709	99.5	0	lcb:LCABL_17250	K02316	dnaG	DNA primase	2.7.7.-	Genetic Information Processing; Replication and repair; DNA replication [PATH:ko03030]
GM001710	99.9	0	lcs:LCBD_1709	K01879	glyS	glycyl-tRNA synthetase beta chain	6.1.1.14	Genetic Information Processing; Translation; Aminoacyl-tRNA biosynthesis [PATH:ko00970]
GM001711	100	6.4e-175	lpq:AF91_06355	K01878	glyQ	glycyl-tRNA synthetase alpha chain	6.1.1.14	Genetic Information Processing; Translation; Aminoacyl-tRNA biosynthesis [PATH:ko00970]
GM001712	99	1.1e-52	lcx:LCA12A_0843
GM001713	100	5.6e-54	lpap:LBPC_1436
GM001714	99.6	2.2e-147	lcl:LOCK919_1685	K03584	recO	DNA repair protein RecO (recombination protein O)	--	Genetic Information Processing; Replication and repair; Homologous recombination [PATH:ko03440]
GM001715	99.7	1.5e-168	lpi:LBPG_00323	K03595	era, ERAL1	GTPase	--
GM001716	100	6.8e-65	lcw:BN194_17000	K01489	cdd, CDA	cytidine deaminase	3.5.4.5	Metabolism; Nucleotide metabolism; Pyrimidine metabolism [PATH:ko00240] Metabolism; Xenobiotics biodegradation and metabolism; Drug metabolism - other enzymes [PATH:ko00983] Metabolism; Global and overview maps; Metabolic pathways [PATH:ko01100]
GM001717	100	1.1e-65	lpi:LBPG_00321	K00887	dgkA	undecaprenol kinase	2.7.1.66	Metabolism; Glycan biosynthesis and metabolism; Peptidoglycan biosynthesis [PATH:ko00550]
GM001718	100	1.9e-82	lpap:LBPC_1441	K07042	ybeY, yqfG	probable rRNA maturation factor	--
GM001719	100	2.2e-170	lpq:AF91_06310	K06217	phoH, phoL	phosphate starvation-inducible protein PhoH and related proteins	--
GM001720	100	9.3e-71	lce:LC2W_1688	K09117	K09117	uncharacterized protein	--
GM001721	98.9	2.3e-46	lcw:BN194_17050	K02970	RP-S21, MRPS21, rpsU	small subunit ribosomal protein S21	--	Genetic Information Processing; Translation; Ribosome [PATH:ko03010]
GM001722	99.6	2.9e-153	lcl:LOCK919_1694	K09773	ppsR	[pyruvate, water dikinase]-phosphate phosphotransferase / [pyruvate, water dikinase] kinase	2.7.4.28 2.7.11.33
GM001723	99.7	7.6e-165	lca:LSEI_1523	K01151	nfo	deoxyribonuclease IV	3.1.21.2	Genetic Information Processing; Replication and repair; Base excision repair [PATH:ko03410]
GM001724	100	8.9e-172	lcw:BN194_17080
GM001725	99.3	3.2e-82	lcz:LCAZH_1512	K07305	msrB	peptide-methionine (R)-S-oxide reductase	1.8.4.12
GM001726	100	0	lca:LSEI_1526	K01876	aspS	aspartyl-tRNA synthetase	6.1.1.12	Genetic Information Processing; Translation; Aminoacyl-tRNA biosynthesis [PATH:ko00970]
GM001727	100	6.4e-245	lcl:LOCK919_1699	K01892	HARS, hisS	histidyl-tRNA synthetase	6.1.1.21	Genetic Information Processing; Translation; Aminoacyl-tRNA biosynthesis [PATH:ko00970]
GM001729	100	4.1e-55	lpq:AF91_06260	K01507	ppa	inorganic pyrophosphatase	3.6.1.1	Metabolism; Energy metabolism; Oxidative phosphorylation [PATH:ko00190]
GM001730	98.6	1.5e-76	lcw:BN194_17130
GM001731	98.4	1.4e-283	lpq:AF91_06240
GM001732	100	6.9e-158	lcb:LCABL_17490
GM001733	99.3	1.2e-81	lcz:LCAZH_1518
GM001734	99.8	1.5e-249	lcl:LOCK919_1704	K01448	amiABC	N-acetylmuramoyl-L-alanine amidase	3.5.1.28	Human Diseases; Drug resistance: Antimicrobial; Cationic antimicrobial peptide (CAMP) resistance [PATH:ko01503]
GM001735	100	6.2e-116	lpap:LBPC_1462
GM001736	100	1.2e-76	lcl:LOCK919_1706	K07560	dtd, DTD	D-aminoacyl-tRNA deacylase	3.1.1.96
GM001737	99.9	0	lpap:LBPC_1464	K00951	relA	GTP pyrophosphokinase	2.7.6.5	Metabolism; Nucleotide metabolism; Purine metabolism [PATH:ko00230]
GM001738	100	8.7e-58	lcw:BN194_17240
GM001739	99.6	1.1e-132	lca:LSEI_1541	K09761	rsmE	16S rRNA (uracil1498-N3)-methyltransferase	2.1.1.193
GM001740	99.7	6.8e-175	lce:LC2W_1709	K02687	prmA	ribosomal protein L11 methyltransferase	2.1.1.-
GM001741	100	1.8e-89	lca:LSEI_1543
GM001742	99	1.8e-112	lcw:BN194_17270	K03652	MPG	DNA-3-methyladenine glycosylase	3.2.2.21	Genetic Information Processing; Replication and repair; Base excision repair [PATH:ko03410]
GM001743	100	3.8e-37	lcs:LCBD_1744
GM001744	99.2	1.5e-67	lce:LC2W_1713
GM001746	98.3	1.5e-27	lcx:LCA12A_0874
GM001747	99.2	2e-64	lpap:LBPC_1473
GM001749	64.9	2.4e-122	lro:LOCK900_1528
GM001750	86.9	2.9e-282	lrc:LOCK908_1622	K00712	tagE	poly(glycerol-phosphate) alpha-glucosyltransferase	2.4.1.52
GM001751	82.8	7.5e-245	lra:LRHK_1557	K00712	tagE	poly(glycerol-phosphate) alpha-glucosyltransferase	2.4.1.52
GM001752	50.4	1.1e-101	lrh:LGG_01588
GM001753	56.3	2.6e-166	lrc:LOCK908_1625
GM001754	64.1	7.2e-17	lrh:LGG_01590
GM001757	66.9	0	lrh:LGG_01592
GM001759	53	1.9e-98	lrl:LC705_01574
GM001760	98.5	1.4e-152	lcz:LCAZH_1538
GM001761	100	5.7e-54	lcx:LCA12A_0880
GM001762	100	3.6e-90	lcl:LOCK919_1725	K03976	ybaK, ebsC	Cys-tRNA(Pro)/Cys-tRNA(Cys) deacylase	3.1.1.-
GM001763	100	2.5e-94	lpap:LBPC_1480	K00759	APRT, apt	adenine phosphoribosyltransferase	2.4.2.7	Metabolism; Nucleotide metabolism; Purine metabolism [PATH:ko00230] Metabolism; Global and overview maps; Metabolic pathways [PATH:ko01100]
GM001764	99.1	0	lcw:BN194_17390	K07462	recJ	single-stranded-DNA-specific exonuclease	3.1.-.-	Genetic Information Processing; Replication and repair; Base excision repair [PATH:ko03410] Genetic Information Processing; Replication and repair; Mismatch repair [PATH:ko03430] Genetic Information Processing; Replication and repair; Homologous recombination [PATH:ko03440]
GM001765	100	2.7e-63	lpi:LBPG_00281
GM001766	99.4	3e-83	lcw:BN194_17420
GM001767	97.5	1.7e-37	lcb:LCABL_17750
GM001768	100	0	lca:LSEI_1562	K03596	lepA	GTP-binding protein LepA	--	Human Diseases; Infectious diseases: Bacterial; Legionellosis [PATH:ko05134]
GM001769	99.7	5.7e-171	lpi:LBPG_03000
GM001770	99.7	2e-179	lpi:LBPG_03067
GM001771	99.7	4.5e-229	lcx:LCA12A_0889	K03686	dnaJ	molecular chaperone DnaJ	--
GM001772	100	4.8e-08	lca:LSEI_1564
GM001773	100	0	lcx:LCA12A_0890	K04043	dnaK, HSPA9	molecular chaperone DnaK	--	Genetic Information Processing; Folding, sorting and degradation; RNA degradation [PATH:ko03018] Organismal Systems; Aging; Longevity regulating pathway - worm [PATH:ko04212] Human Diseases; Infectious diseases: Bacterial; Tuberculosis [PATH:ko05152]
GM001774	100	5.6e-103	lcw:BN194_17470	K03687	GRPE	molecular chaperone GrpE	--
GM001775	100	1.4e-192	lcz:LCAZH_1554	K03705	hrcA	heat-inducible transcriptional repressor	--
GM001776	100	8.6e-225	lcz:LCAZH_1555
GM001777	98.7	4e-175	lcx:LCA12A_0894	K11753	ribF	riboflavin kinase / FMN adenylyltransferase	2.7.1.26 2.7.7.2	Metabolism; Metabolism of cofactors and vitamins; Riboflavin metabolism [PATH:ko00740] Metabolism; Global and overview maps; Metabolic pathways [PATH:ko01100] Metabolism; Global and overview maps; Biosynthesis of secondary metabolites [PATH:ko01110]
GM001778	100	1.4e-169	lcw:BN194_17520	K03177	truB, PUS4, TRUB1	tRNA pseudouridine55 synthase	5.4.99.25
GM001779	100	9.6e-117	lce:LC2W_1738
GM001781	100	5.6e-58	lcl:LOCK919_1742	K02834	rbfA	ribosome-binding factor A	--
GM001782	99.7	0	lca:LSEI_1573	K02519	infB, MTIF2	translation initiation factor IF-2	--
GM001783	99	7.2e-46	lcw:BN194_17560
GM001784	100	3.7e-47	lca:LSEI_1575	K07742	ylxR	uncharacterized protein	--
GM001785	99.8	1e-231	lce:LC2W_1743	K02600	nusA	N utilization substance protein A	--
GM001786	99.4	2.1e-84	lcl:LOCK919_1747	K09748	rimP	ribosome maturation factor RimP	--
GM001787	99.8	0	lpap:LBPC_1500	K03763	polC	DNA polymerase III subunit alpha, Gram-positive type	2.7.7.7	Metabolism; Nucleotide metabolism; Purine metabolism [PATH:ko00230] Metabolism; Nucleotide metabolism; Pyrimidine metabolism [PATH:ko00240] Metabolism; Global and overview maps; Metabolic pathways [PATH:ko01100] Genetic Information Processing; Replication and repair; DNA replication [PATH:ko03030] Genetic Information Processing; Replication and repair; Mismatch repair [PATH:ko03430] Genetic Infor…
GM001788	100	0	lcz:LCAZH_1566	K01881	PARS, proS	prolyl-tRNA synthetase	6.1.1.15	Genetic Information Processing; Translation; Aminoacyl-tRNA biosynthesis [PATH:ko00970]
GM001789	100	1.3e-234	lca:LSEI_1580	K11749	rseP	regulator of sigma E protease	3.4.24.-	Cellular Processes; Cellular community - prokaryotes; Quorum sensing [PATH:ko02024] Cellular Processes; Cell growth and death; Cell cycle - Caulobacter [PATH:ko04112]
GM001790	100	9.7e-143	lcl:LOCK919_1751	K00981	E2.7.7.41, CDS1, CDS2, cdsA	phosphatidate cytidylyltransferase	2.7.7.41	Metabolism; Lipid metabolism; Glycerophospholipid metabolism [PATH:ko00564] Metabolism; Global and overview maps; Metabolic pathways [PATH:ko01100] Metabolism; Global and overview maps; Biosynthesis of secondary metabolites [PATH:ko01110] Environmental Information Processing; Signal transduction; Phosphatidylinositol signaling system [PATH:ko04070]
GM001791	98.9	1.9e-146	lcw:BN194_17640	K00806	uppS	undecaprenyl diphosphate synthase	2.5.1.31	Metabolism; Metabolism of terpenoids and polyketides; Terpenoid backbone biosynthesis [PATH:ko00900] Metabolism; Global and overview maps; Biosynthesis of secondary metabolites [PATH:ko01110]
GM001792	100	2.2e-96	lcz:LCAZH_1570	K02838	frr, MRRF, RRF	ribosome recycling factor	--
GM001793	100	1.1e-129	lcs:LCBD_1783	K09903	pyrH	uridylate kinase	2.7.4.22	Metabolism; Nucleotide metabolism; Pyrimidine metabolism [PATH:ko00240] Metabolism; Global and overview maps; Metabolic pathways [PATH:ko01100]
GM001794	100	9.8e-160	lcw:BN194_17670	K02357	tsf, TSFM	elongation factor Ts	--
GM001795	100	9.5e-143	lcx:LCA12A_2161	K02967	RP-S2, MRPS2, rpsB	small subunit ribosomal protein S2	--	Genetic Information Processing; Translation; Ribosome [PATH:ko03010]
GM001796	98.9	1.3e-46	lcl:LOCK919_1758	K07461	K07461	putative endonuclease	--
GM001797	99.2	3.3e-129	lcs:LCBD_1788
GM001798	100	5.4e-123	lpq:AF91_05950	K00655	plsC	1-acyl-sn-glycerol-3-phosphate acyltransferase	2.3.1.51	Metabolism; Lipid metabolism; Glycerolipid metabolism [PATH:ko00561] Metabolism; Lipid metabolism; Glycerophospholipid metabolism [PATH:ko00564] Metabolism; Global and overview maps; Metabolic pathways [PATH:ko01100] Metabolism; Global and overview maps; Biosynthesis of secondary metabolites [PATH:ko01110]
GM001799	99.6	3.5e-260	lpi:LBPG_00864	K03294	TC.APA	basic amino acid/polyamine antiporter, APA family	--
GM001800	99.6	1.6e-145	lpi:LBPG_03076
GM001801	99.5	0	lcw:BN194_17730	K18890	mdlB, smdB	ATP-binding cassette, subfamily B, multidrug efflux pump	--	Environmental Information Processing; Membrane transport; ABC transporters [PATH:ko02010]
GM001802	99.8	0	lca:LSEI_1593	K18889	mdlA, smdA	ATP-binding cassette, subfamily B, multidrug efflux pump	--	Environmental Information Processing; Membrane transport; ABC transporters [PATH:ko02010]
GM001803	100	1.7e-37	lcw:BN194_17740	K09976	K09976	uncharacterized protein	--
GM001804	100	4.3e-45	lcw:BN194_17750
GM001805	100	6.9e-25	lcx:LCA12A_1287
GM001806	100	5.5e-58	lpq:AF91_05910	K02884	RP-L19, MRPL19, rplS	large subunit ribosomal protein L19	--	Genetic Information Processing; Translation; Ribosome [PATH:ko03010]
GM001807	100	4.5e-145	lcx:LCA12A_1285	K00554	trmD	tRNA (guanine37-N1)-methyltransferase	2.1.1.228
GM001808	100	1.3e-92	lpap:LBPC_1521	K02860	rimM	16S rRNA processing protein RimM	--
GM001809	98.8	4.6e-38	lcs:LCBD_1800	K06960	K06960	uncharacterized protein	--
GM001810	100	1.8e-46	lcw:BN194_17810	K02959	RP-S16, MRPS16, rpsP	small subunit ribosomal protein S16	--	Genetic Information Processing; Translation; Ribosome [PATH:ko03010]
GM001811	99.8	8.7e-267	lcs:LCBD_1802	K03106	SRP54, ffh	signal recognition particle subunit SRP54	3.6.5.4	Cellular Processes; Cellular community - prokaryotes; Quorum sensing [PATH:ko02024] Genetic Information Processing; Folding, sorting and degradation; Protein export [PATH:ko03060] Environmental Information Processing; Membrane transport; Bacterial secretion system [PATH:ko03070]
GM001812	100	2.4e-58	lcw:BN194_17830	K09787	K09787	uncharacterized protein	--
GM001813	100	3e-55	lcw:BN194_17840
GM001814	99.4	1e-181	lpi:LBPG_00880	K03110	ftsY	fused signal recognition particle receptor	--	Cellular Processes; Cellular community - prokaryotes; Quorum sensing [PATH:ko02024] Genetic Information Processing; Folding, sorting and degradation; Protein export [PATH:ko03060] Environmental Information Processing; Membrane transport; Bacterial secretion system [PATH:ko03070]
GM001815	99.8	0	lcw:BN194_17860	K03529	smc	chromosome segregation protein	--
GM001816	100	1.2e-125	lcb:LCABL_18210	K03685	rnc, DROSHA, RNT1	ribonuclease III	3.1.26.3	Genetic Information Processing; Translation; Ribosome biogenesis in eukaryotes [PATH:ko03008] Human Diseases; Cancers: Overview; Proteoglycans in cancer [PATH:ko05205]
GM001817	92	0	lcs:LCBD_1808	K02035	ABC.PE.S	peptide/nickel transport system substrate-binding protein	--	Cellular Processes; Cellular community - prokaryotes; Quorum sensing [PATH:ko02024]
GM001818	98.3	1.3e-162	lcl:LOCK919_1780	K02034	ABC.PE.P1	peptide/nickel transport system permease protein	--	Cellular Processes; Cellular community - prokaryotes; Quorum sensing [PATH:ko02024]
GM001819	100	9.3e-180	lcx:LCA12A_1272	K02033	ABC.PE.P	peptide/nickel transport system permease protein	--	Cellular Processes; Cellular community - prokaryotes; Quorum sensing [PATH:ko02024]
GM001820	100	3.5e-179	lpi:LBPG_00886	K02032	ABC.PE.A1	peptide/nickel transport system ATP-binding protein	--	Cellular Processes; Cellular community - prokaryotes; Quorum sensing [PATH:ko02024]
GM001821	100	3.2e-194	lcw:BN194_17920	K02031	ABC.PE.A	peptide/nickel transport system ATP-binding protein	--	Cellular Processes; Cellular community - prokaryotes; Quorum sensing [PATH:ko02024]
GM001822	100	9.8e-38	lce:LC2W_1785	K02078	acpP	acyl carrier protein	--	Metabolism; Biosynthesis of other secondary metabolites; Biosynthesis of secondary metabolites - unclassified [PATH:ko00999] Metabolism; Global and overview maps; Biosynthesis of antibiotics [PATH:ko01130]
GM001823	99.7	8.9e-189	lcl:LOCK919_1785	K03621	plsX	glycerol-3-phosphate acyltransferase PlsX	2.3.1.15	Metabolism; Lipid metabolism; Glycerolipid metabolism [PATH:ko00561] Metabolism; Lipid metabolism; Glycerophospholipid metabolism [PATH:ko00564] Metabolism; Global and overview maps; Metabolic pathways [PATH:ko01100] Metabolism; Global and overview maps; Biosynthesis of secondary metabolites [PATH:ko01110]
GM001824	99.6	0	lcl:LOCK919_1786	K03655	recG	ATP-dependent DNA helicase RecG	3.6.4.12	Genetic Information Processing; Replication and repair; Homologous recombination [PATH:ko03440]
GM001825	99.6	0	lcw:BN194_17960	K07030	K07030	uncharacterized protein	--
GM001826	100	1.2e-58	lce:LC2W_1789
GM001827	98.4	1.3e-26	lcz:LCAZH_1607	K02902	RP-L28, MRPL28, rpmB	large subunit ribosomal protein L28	--	Genetic Information Processing; Translation; Ribosome [PATH:ko03010]
GM001828	99.7	1.9e-216	lpq:AF91_05200
GM001829	98.3	3.1e-25	lca:LSEI_1334
GM001830	99.1	2.4e-126	lcb:LCABL_18340	K00949	thiN, TPK1, THI80	thiamine pyrophosphokinase	2.7.6.2	Metabolism; Metabolism of cofactors and vitamins; Thiamine metabolism [PATH:ko00730] Metabolism; Global and overview maps; Metabolic pathways [PATH:ko01100]
GM001831	100	2.8e-119	lcw:BN194_18000	K01783	rpe, RPE	ribulose-phosphate 3-epimerase	5.1.3.1	Metabolism; Carbohydrate metabolism; Pentose phosphate pathway [PATH:ko00030] Metabolism; Carbohydrate metabolism; Pentose and glucuronate interconversions [PATH:ko00040] Metabolism; Energy metabolism; Carbon fixation in photosynthetic organisms [PATH:ko00710] Metabolism; Global and overview maps; Metabolic pathways [PATH:ko01100] Metabolism; Global and overview maps; Biosynthesis of secondary me…
GM001832	99.7	5.7e-171	lce:LC2W_1794	K06949	rsgA, engC	ribosome biogenesis GTPase / thiamine phosphate phosphatase	3.6.1.- 3.1.3.100	Metabolism; Metabolism of cofactors and vitamins; Thiamine metabolism [PATH:ko00730] Metabolism; Global and overview maps; Metabolic pathways [PATH:ko01100]
GM001833	98.5	0	lpap:LBPC_1546	K12132	prkC, stkP	eukaryotic-like serine/threonine-protein kinase	2.7.11.1
GM001834	100	6.3e-136	lpap:LBPC_1547	K20074	prpC, phpP	PPM family protein phosphatase	3.1.3.16
GM001835	99.8	6.1e-254	lcx:LCA12A_1258	K03500	rsmB, sun	16S rRNA (cytosine967-C5)-methyltransferase	2.1.1.176
GM001836	100	1.3e-176	lcl:LOCK919_1796	K00604	MTFMT, fmt	methionyl-tRNA formyltransferase	2.1.2.9	Metabolism; Metabolism of cofactors and vitamins; One carbon pool by folate [PATH:ko00670] Genetic Information Processing; Translation; Aminoacyl-tRNA biosynthesis [PATH:ko00970]
GM001837	99.8	0	lcl:LOCK919_1797	K04066	priA	primosomal protein N' (replication factor Y) (superfamily II helicase)	3.6.4.-	Genetic Information Processing; Replication and repair; Homologous recombination [PATH:ko03440]
GM001838	99.7	2.3e-220	lce:LC2W_1800	K13038	coaBC, dfp	phosphopantothenoylcysteine decarboxylase / phosphopantothenate---cysteine ligase	4.1.1.36 6.3.2.5	Metabolism; Metabolism of cofactors and vitamins; Pantothenate and CoA biosynthesis [PATH:ko00770] Metabolism; Global and overview maps; Metabolic pathways [PATH:ko01100]
GM001839	100	6.5e-37	lpq:AF91_05750	K03060	rpoZ	DNA-directed RNA polymerase subunit omega	2.7.7.6	Metabolism; Nucleotide metabolism; Purine metabolism [PATH:ko00230] Metabolism; Nucleotide metabolism; Pyrimidine metabolism [PATH:ko00240] Metabolism; Global and overview maps; Metabolic pathways [PATH:ko01100] Genetic Information Processing; Transcription; RNA polymerase [PATH:ko03020]
GM001840	100	5.8e-111	lcb:LCABL_18440	K00942	E2.7.4.8, gmk	guanylate kinase	2.7.4.8	Metabolism; Nucleotide metabolism; Purine metabolism [PATH:ko00230] Metabolism; Global and overview maps; Metabolic pathways [PATH:ko01100]
GM001841	99.6	4.8e-128	lpq:AF91_05740	K07001	K07001	NTE family protein	--
GM001842	99	1.9e-49	lpap:LBPC_1555
GM001843	97.5	1.3e-14	lcs:LCBD_1834
GM001844	100	0	lpq:AF91_05725	K03631	recN	DNA repair protein RecN (Recombination protein N)	--
GM001845	100	1.5e-76	lpap:LBPC_1557	K03402	argR, ahrC	transcriptional regulator of arginine metabolism	--
GM001846	100	9.8e-154	lcw:BN194_18170	K06442	tlyA	23S rRNA (cytidine1920-2'-O)/16S rRNA (cytidine1409-2'-O)-methyltransferase	2.1.1.226 2.1.1.227
GM001847	99.6	3.8e-153	lpq:AF91_05710	K13789	GGPS	geranylgeranyl diphosphate synthase, type II	2.5.1.1 2.5.1.10 2.5.1.29	Metabolism; Metabolism of terpenoids and polyketides; Terpenoid backbone biosynthesis [PATH:ko00900] Metabolism; Global and overview maps; Metabolic pathways [PATH:ko01100] Metabolism; Global and overview maps; Biosynthesis of secondary metabolites [PATH:ko01110] Metabolism; Global and overview maps; Biosynthesis of antibiotics [PATH:ko01130]
GM001848	100	4.7e-34	lca:LSEI_1637	K03602	xseB	exodeoxyribonuclease VII small subunit	3.1.11.6	Genetic Information Processing; Replication and repair; Mismatch repair [PATH:ko03430]
GM001849	99.8	1.7e-251	lpap:LBPC_1561	K03601	xseA	exodeoxyribonuclease VII large subunit	3.1.11.6	Genetic Information Processing; Replication and repair; Mismatch repair [PATH:ko03430]
GM001850	99.7	3e-153	lcw:BN194_18210	K01491	folD	methylenetetrahydrofolate dehydrogenase (NADP+) / methenyltetrahydrofolate cyclohydrolase	1.5.1.5 3.5.4.9	Metabolism; Metabolism of cofactors and vitamins; One carbon pool by folate [PATH:ko00670] Metabolism; Energy metabolism; Carbon fixation pathways in prokaryotes [PATH:ko00720] Metabolism; Global and overview maps; Metabolic pathways [PATH:ko01100] Metabolism; Global and overview maps; Microbial metabolism in diverse environments [PATH:ko01120] Metabolism; Global and overview maps; Carbon metabol…
GM001851	100	7.1e-68	lpap:LBPC_1563	K03625	nusB	N utilization substance protein B	--
GM001852	100	2.6e-79	lcb:LCABL_18570
GM001853	100	5.9e-102	lcb:LCABL_18580	K02356	efp	elongation factor P	--
GM001854	65.1	1.1e-21	lpi:LBPG_03112
GM001855	99.4	1.6e-201	lpq:AF91_05670	K01262	pepP	Xaa-Pro aminopeptidase	3.4.11.9
GM001856	100	2.5e-48	lcs:LCBD_1846	K02899	RP-L27, MRPL27, rpmA	large subunit ribosomal protein L27	--	Genetic Information Processing; Translation; Ribosome [PATH:ko03010]
GM001857	100	5.6e-58	lpap:LBPC_1568	K07584	ysxB	uncharacterized protein	--
GM001858	99.2	7.2e-61	lcw:BN194_18290	K02888	RP-L21, MRPL21, rplU	large subunit ribosomal protein L21	--	Genetic Information Processing; Translation; Ribosome [PATH:ko03010]
GM001860	100	1.2e-28	lpq:AF91_05650
GM001861	100	1.1e-13	lcl:LOCK919_1819
GM001862	100	6.7e-59	lpq:AF91_05640
GM001863	99.6	0	lce:LC2W_1825	K01281	pepX	X-Pro dipeptidyl-peptidase	3.4.14.11
GM001864	100	3.3e-260	lcx:LCA12A_1231	K01915	glnA, GLUL	glutamine synthetase	6.3.1.2	Metabolism; Amino acid metabolism; Arginine biosynthesis [PATH:ko00220] Metabolism; Amino acid metabolism; Alanine, aspartate and glutamate metabolism [PATH:ko00250] Metabolism; Carbohydrate metabolism; Glyoxylate and dicarboxylate metabolism [PATH:ko00630] Metabolism; Energy metabolism; Nitrogen metabolism [PATH:ko00910] Metabolism; Global and overview maps; Metabolic pathways [PATH:ko01100] Met…
GM001865	100	3.3e-61	lcl:LOCK919_1824	K03713	glnR	MerR family transcriptional regulator, glutamine synthetase repressor	--
GM001866	99.1	0	lcx:LCA12A_1229	K01581	E4.1.1.17, ODC1, speC, speF	ornithine decarboxylase	4.1.1.17	Metabolism; Amino acid metabolism; Arginine and proline metabolism [PATH:ko00330] Metabolism; Metabolism of other amino acids; Glutathione metabolism [PATH:ko00480] Metabolism; Global and overview maps; Metabolic pathways [PATH:ko01100] Metabolism; Global and overview maps; Biosynthesis of secondary metabolites [PATH:ko01110] Metabolism; Global and overview maps; Biosynthesis of antibiotics [PATH…
GM001867	99.5	2e-235	lpap:LBPC_1577
GM001868	99.4	4.8e-173	lpq:AF91_05605	K00791	miaA, TRIT1	tRNA dimethylallyltransferase	2.5.1.75	Metabolism; Metabolism of terpenoids and polyketides; Zeatin biosynthesis [PATH:ko00908] Metabolism; Global and overview maps; Metabolic pathways [PATH:ko01100] Metabolism; Global and overview maps; Biosynthesis of secondary metabolites [PATH:ko01110]
GM001869	100	6.4e-26	lpq:AF91_05600
GM001870	99.3	2.9e-74	lce:LC2W_1832
GM001871	100	2.2e-181	lcb:LCABL_18750	K00845	glk	glucokinase	2.7.1.2	Metabolism; Carbohydrate metabolism; Glycolysis / Gluconeogenesis [PATH:ko00010] Metabolism; Carbohydrate metabolism; Galactose metabolism [PATH:ko00052] Metabolism; Carbohydrate metabolism; Starch and sucrose metabolism [PATH:ko00500] Metabolism; Carbohydrate metabolism; Amino sugar and nucleotide sugar metabolism [PATH:ko00520] Metabolism; Biosynthesis of other secondary metabolites; Streptomyc…
GM001872	100	1.2e-41	lcb:LCABL_18760
GM001873	100	2.7e-125	lca:LSEI_1661	K19225	gluP	rhomboid protease GluP	3.4.21.105
GM001874	99.9	0	lpap:LBPC_1584
GM001875	99.2	0	lpi:LBPG_00938
GM001876	100	4.2e-54	lpi:LBPG_00940
GM001877	100	7.5e-120	lcw:BN194_18490	K11618	liaR	two-component system, NarL family, response regulator LiaR	--	Environmental Information Processing; Signal transduction; Two-component system [PATH:ko02020]
GM001878	99.4	2.9e-187	lpap:LBPC_1588	K11617	liaS	two-component system, NarL family, sensor histidine kinase LiaS	2.7.13.3	Environmental Information Processing; Signal transduction; Two-component system [PATH:ko02020]
GM001879	99.6	5.8e-131	lcl:LOCK919_1839
GM001880	100	6.9e-80	lpq:AF91_05545	K03624	greA	transcription elongation factor GreA	--
GM001881	99.5	1.2e-114	lce:LC2W_1844	K00876	udk, UCK	uridine kinase	2.7.1.48	Metabolism; Nucleotide metabolism; Pyrimidine metabolism [PATH:ko00240] Metabolism; Xenobiotics biodegradation and metabolism; Drug metabolism - other enzymes [PATH:ko00983] Metabolism; Global and overview maps; Metabolic pathways [PATH:ko01100]
GM001882	99.8	3.6e-221	lcz:LCAZH_1660	K07082	K07082	UPF0755 protein	--
GM001883	99.1	0	lca:LSEI_1671	K01890	FARSB, pheT	phenylalanyl-tRNA synthetase beta chain	6.1.1.20	Genetic Information Processing; Translation; Aminoacyl-tRNA biosynthesis [PATH:ko00970]
GM001884	99.7	2.7e-201	lcx:LCA12A_1210	K01889	FARSA, pheS	phenylalanyl-tRNA synthetase alpha chain	6.1.1.20	Genetic Information Processing; Translation; Aminoacyl-tRNA biosynthesis [PATH:ko00970]
GM001885	100	1.3e-65	lcw:BN194_18590
GM001886	100	3.4e-93	lcw:BN194_18600	K06950	K06950	uncharacterized protein	--
GM001887	100	6.3e-139	lcl:LOCK919_1847	K03437	spoU	RNA methyltransferase, TrmH family	--
GM001888	100	5.4e-52	lcw:BN194_18620	K01512	acyP	acylphosphatase	3.6.1.7	Metabolism; Carbohydrate metabolism; Pyruvate metabolism [PATH:ko00620] Metabolism; Xenobiotics biodegradation and metabolism; Aminobenzoate degradation [PATH:ko00627] Metabolism; Global and overview maps; Microbial metabolism in diverse environments [PATH:ko01120]
GM001889	100	5.3e-186	lcs:LCBD_1873	K03217	yidC, spoIIIJ, OXA1, ccfA	YidC/Oxa1 family membrane protein insertase	--	Cellular Processes; Cellular community - prokaryotes; Quorum sensing [PATH:ko02024] Genetic Information Processing; Folding, sorting and degradation; Protein export [PATH:ko03060] Environmental Information Processing; Membrane transport; Bacterial secretion system [PATH:ko03070]
GM001890	99.8	1.9e-294	lcb:LCABL_18970
GM001891	100	4.3e-123	lpq:AF91_05490
GM001892	99.8	1.1e-269	lpap:LBPC_1602	K00033	PGD, gnd, gntZ	6-phosphogluconate dehydrogenase	1.1.1.44 1.1.1.343	Metabolism; Carbohydrate metabolism; Pentose phosphate pathway [PATH:ko00030] Metabolism; Metabolism of other amino acids; Glutathione metabolism [PATH:ko00480] Metabolism; Global and overview maps; Metabolic pathways [PATH:ko01100] Metabolism; Global and overview maps; Biosynthesis of secondary metabolites [PATH:ko01110] Metabolism; Global and overview maps; Microbial metabolism in diverse envir…
GM001893	98.8	7e-39	lpi:LBPG_00959
GM001894	99.5	2.7e-99	lpap:LBPC_1604	K07040	K07040	uncharacterized protein	--
GM001895	99.5	1.8e-211	lcl:LOCK919_1854
GM001896	100	1.2e-139	lca:LSEI_1685
GM001897	100	7.9e-60	lpi:LBPG_00963	K09710	ybeB	ribosome-associated protein	--
GM001898	99.5	1.5e-108	lcb:LCABL_19050
GM001899	100	6.6e-121	lcx:LCA12A_0021	K00969	nadD	nicotinate-nucleotide adenylyltransferase	2.7.7.18	Metabolism; Metabolism of cofactors and vitamins; Nicotinate and nicotinamide metabolism [PATH:ko00760] Metabolism; Global and overview maps; Metabolic pathways [PATH:ko01100]
GM001900	100	7.1e-49	lcz:LCAZH_1678	K07574	yhbY	RNA-binding protein	--
GM001901	100	1.1e-216	lpq:AF91_05440	K06948	yqeH	30S ribosome assembly GTPase	--
GM001902	99.4	5.7e-97	lcl:LOCK919_1861	K07015	K07015	uncharacterized protein	--
GM001903	99.7	5.6e-171	lpap:LBPC_1613
GM001904	99.7	7.6e-190	lpq:AF91_05425	K15975	K15975	glyoxalase family protein	--
GM001905	99.5	1.9e-120	lpi:LBPG_00971	K06999	K06999	phospholipase/carboxylesterase	--
GM001906	99.4	5.5e-180	lcx:LCA12A_0028
GM001907	99.5	5e-101	lpap:LBPC_1617	K06966	ppnN	pyrimidine/purine-5'-nucleotide nucleosidase	3.2.2.10 3.2.2.-	Metabolism; Nucleotide metabolism; Purine metabolism [PATH:ko00230] Metabolism; Nucleotide metabolism; Pyrimidine metabolism [PATH:ko00240]
GM001908	100	6.7e-59	lcx:LCA12A_0030	K02887	RP-L20, MRPL20, rplT	large subunit ribosomal protein L20	--	Genetic Information Processing; Translation; Ribosome [PATH:ko03010]
GM001909	100	1.4e-29	lrh:LGG_01746	K02916	RP-L35, MRPL35, rpmI	large subunit ribosomal protein L35	--	Genetic Information Processing; Translation; Ribosome [PATH:ko03010]
GM001910	100	1.3e-78	lcw:BN194_18820	K02520	infC, MTIF3	translation initiation factor IF-3	--
GM001911	99.1	3.2e-129	lcb:LCABL_19180
GM001912	99.3	7.2e-79	lcs:LCBD_1896
GM001913	97.4	3.6e-102	lca:LSEI_1702	K01834	PGAM, gpmA	2,3-bisphosphoglycerate-dependent phosphoglycerate mutase	5.4.2.11	Metabolism; Carbohydrate metabolism; Glycolysis / Gluconeogenesis [PATH:ko00010] Metabolism; Amino acid metabolism; Glycine, serine and threonine metabolism [PATH:ko00260] Metabolism; Energy metabolism; Methane metabolism [PATH:ko00680] Metabolism; Global and overview maps; Metabolic pathways [PATH:ko01100] Metabolism; Global and overview maps; Biosynthesis of secondary metabolites [PATH:ko01110]…
GM001914	99.9	0	lcw:BN194_18860	K01868	TARS, thrS	threonyl-tRNA synthetase	6.1.1.3	Genetic Information Processing; Translation; Aminoacyl-tRNA biosynthesis [PATH:ko00970]
GM001915	100	5.3e-74	lpq:AF91_05370
GM001916	82.5	1.8e-140	lrc:LOCK908_1789	K11144	dnaI	primosomal protein DnaI	--
GM001917	95.7	5.8e-244	lcs:LCBD_1901	K03346	dnaB	replication initiation and membrane attachment protein	--
GM001918	100	6.6e-50	lcb:LCABL_19250	K07738	nrdR	transcriptional repressor NrdR	--
GM001920	99	3.7e-102	lpap:LBPC_1628	K00859	coaE	dephospho-CoA kinase	2.7.1.24	Metabolism; Metabolism of cofactors and vitamins; Pantothenate and CoA biosynthesis [PATH:ko00770] Metabolism; Global and overview maps; Metabolic pathways [PATH:ko01100]
GM001921	98	4.6e-165	lcw:BN194_18920	K10563	mutM, fpg	formamidopyrimidine-DNA glycosylase	3.2.2.23 4.2.99.18	Genetic Information Processing; Replication and repair; Base excision repair [PATH:ko03410]
GM001922	99.7	0	lpap:LBPC_1630	K02335	polA	DNA polymerase I	2.7.7.7	Metabolism; Nucleotide metabolism; Purine metabolism [PATH:ko00230] Metabolism; Nucleotide metabolism; Pyrimidine metabolism [PATH:ko00240] Metabolism; Global and overview maps; Metabolic pathways [PATH:ko01100] Genetic Information Processing; Replication and repair; DNA replication [PATH:ko03030] Genetic Information Processing; Replication and repair; Base excision repair [PATH:ko03410] Genetic …
GM001923	99.6	1.5e-126	lcw:BN194_18940	K06890	K06890	uncharacterized protein	--
GM001924	99.8	1.7e-253	lpap:LBPC_1632	K01924	murC	UDP-N-acetylmuramate--alanine ligase	6.3.2.8	Metabolism; Metabolism of other amino acids; D-Glutamine and D-glutamate metabolism [PATH:ko00471] Metabolism; Glycan biosynthesis and metabolism; Peptidoglycan biosynthesis [PATH:ko00550] Metabolism; Global and overview maps; Metabolic pathways [PATH:ko01100]
GM001925	98.6	0	lpap:LBPC_1633	K03466	ftsK, spoIIIE	DNA segregation ATPase FtsK/SpoIIIE, S-DNA-T family	--
GM001926	100	2.8e-116	lcl:LOCK919_1884	K06878	K06878	tRNA-binding protein	--
GM001927	100	3.7e-56	lcw:BN194_18980
GM001928	97.3	2.1e-57	lce:LC2W_1890
GM001929	99.1	7.2e-120	lcx:LCA12A_0049	K03439	trmB, METTL1, TRM8	tRNA (guanine-N7-)-methyltransferase	2.1.1.33
GM001930	100	3.7e-147	lcw:BN194_19010
GM001931	99.5	4.7e-229	lcl:LOCK919_1889	K01992	ABC-2.P	ABC-2 type transport system permease protein	--
GM001932	100	1.3e-133	lcx:LCA12A_0052	K01990	ABC-2.A	ABC-2 type transport system ATP-binding protein	--
GM001933	100	3e-77	lcw:BN194_19040	K02503	HINT1, hinT, hit	histidine triad (HIT) family protein	--
GM001934	100	7.9e-63	lca:LSEI_1721
GM001935	100	3.2e-166	lca:LSEI_1722	K07533	prsA	foldase protein PrsA	5.2.1.8
GM001936	99.7	1.4e-183	lcl:LOCK919_1894	K03698	cbf, cbf1	3'-5' exoribonuclease	3.1.-.-
GM001937	97.5	1.9e-13	lcz:LCAZH_1714
GM001938	100	4.6e-57	lpi:LBPG_01002
GM001939	100	0	lcx:LCA12A_0058	K12555	pbp2A	penicillin-binding protein 2A	2.4.1.129 3.4.16.4	Metabolism; Glycan biosynthesis and metabolism; Peptidoglycan biosynthesis [PATH:ko00550] Metabolism; Global and overview maps; Metabolic pathways [PATH:ko01100] Human Diseases; Drug resistance: Antimicrobial; beta-Lactam resistance [PATH:ko01501]
GM001940	99.6	1.8e-155	lcb:LCABL_19460	K06180	rluD	23S rRNA pseudouridine1911/1915/1917 synthase	5.4.99.23
GM001941	100	5.9e-76	lpq:AF91_05245	K03402	argR, ahrC	transcriptional regulator of arginine metabolism	--
GM001942	100	0	lcz:LCAZH_1719	K01887	RARS, argS	arginyl-tRNA synthetase	6.1.1.19	Genetic Information Processing; Translation; Aminoacyl-tRNA biosynthesis [PATH:ko00970]
GM001943	100	3.8e-68	lcs:LCBD_1926
GM001944	100	1.2e-24	lpap:LBPC_1651
GM001945	100	7.2e-177	lpap:LBPC_1652	K00226	pyrD	dihydroorotate dehydrogenase (fumarate)	1.3.98.1	Metabolism; Nucleotide metabolism; Pyrimidine metabolism [PATH:ko00240] Metabolism; Global and overview maps; Metabolic pathways [PATH:ko01100]
GM001946	99.5	0	lpq:AF91_05215	K01126	E3.1.4.46, glpQ, ugpQ	glycerophosphoryl diester phosphodiesterase	3.1.4.46	Metabolism; Lipid metabolism; Glycerophospholipid metabolism [PATH:ko00564]
GM001947	100	1.8e-124	lpq:AF91_05210	K16511	mecA1_2	adapter protein MecA 1/2	--
GM001948	97.9	4.4e-17	lcs:LCBD_1932
GM001949	100	8.6e-56	lca:LSEI_1735	K16509	spxA	regulatory protein spx	--
GM001950	99.6	2.6e-137	lcl:LOCK919_1910
GM001951	100	6.8e-92	lpq:AF91_05185
GM001952	99.7	0	lcb:LCABL_19580	K02004	ABC.CD.P	putative ABC transport system permease protein	--
GM001953	100	2.4e-138	lcl:LOCK919_1913	K02003	ABC.CD.A	putative ABC transport system ATP-binding protein	--
GM001954	100	3.9e-121	lpi:LBPG_01018
GM001955	99.7	1.1e-208	lpap:LBPC_1661	K19168	cptA	toxin CptA	--
GM001956	100	1.5e-108	lcz:LCAZH_1734	K04068	nrdG	anaerobic ribonucleoside-triphosphate reductase activating protein	1.97.1.4
GM001957	95.4	0	lcz:LCAZH_1735	K01533	copB	Cu2+-exporting ATPase	3.6.3.4
GM001958	100	4.7e-78	lcz:LCAZH_1736
GM001959	100	6.2e-26	lca:LSEI_1334
GM001960	99.7	1.9e-216	lpq:AF91_07645
GM001961	100	1.5e-235	lcl:LOCK919_1919	K01945	purD	phosphoribosylamine---glycine ligase	6.3.4.13	Metabolism; Nucleotide metabolism; Purine metabolism [PATH:ko00230] Metabolism; Global and overview maps; Metabolic pathways [PATH:ko01100] Metabolism; Global and overview maps; Biosynthesis of secondary metabolites [PATH:ko01110] Metabolism; Global and overview maps; Biosynthesis of antibiotics [PATH:ko01130]
GM001962	99.6	3e-289	lcx:LCA12A_0079	K00602	purH	phosphoribosylaminoimidazolecarboxamide formyltransferase / IMP cyclohydrolase	2.1.2.3 3.5.4.10	Metabolism; Nucleotide metabolism; Purine metabolism [PATH:ko00230] Metabolism; Metabolism of cofactors and vitamins; One carbon pool by folate [PATH:ko00670] Metabolism; Global and overview maps; Metabolic pathways [PATH:ko01100] Metabolism; Global and overview maps; Biosynthesis of secondary metabolites [PATH:ko01110] Metabolism; Global and overview maps; Biosynthesis of antibiotics [PATH:ko011…
GM001963	99.5	9.6e-100	lcl:LOCK919_1921	K11175	purN	phosphoribosylglycinamide formyltransferase 1	2.1.2.2	Metabolism; Nucleotide metabolism; Purine metabolism [PATH:ko00230] Metabolism; Metabolism of cofactors and vitamins; One carbon pool by folate [PATH:ko00670] Metabolism; Global and overview maps; Metabolic pathways [PATH:ko01100] Metabolism; Global and overview maps; Biosynthesis of secondary metabolites [PATH:ko01110] Metabolism; Global and overview maps; Biosynthesis of antibiotics [PATH:ko011…
GM001964	98.5	1.9e-183	lcs:LCBD_1946	K01933	purM	phosphoribosylformylglycinamidine cyclo-ligase	6.3.3.1	Metabolism; Nucleotide metabolism; Purine metabolism [PATH:ko00230] Metabolism; Global and overview maps; Metabolic pathways [PATH:ko01100] Metabolism; Global and overview maps; Biosynthesis of secondary metabolites [PATH:ko01110] Metabolism; Global and overview maps; Biosynthesis of antibiotics [PATH:ko01130]
GM001965	100	1.6e-276	lcl:LOCK919_1923	K00764	purF, PPAT	amidophosphoribosyltransferase	2.4.2.14	Metabolism; Nucleotide metabolism; Purine metabolism [PATH:ko00230] Metabolism; Amino acid metabolism; Alanine, aspartate and glutamate metabolism [PATH:ko00250] Metabolism; Global and overview maps; Metabolic pathways [PATH:ko01100] Metabolism; Global and overview maps; Biosynthesis of secondary metabolites [PATH:ko01110] Metabolism; Global and overview maps; Biosynthesis of antibiotics [PATH:ko…
GM001966	99.5	0	lpap:LBPC_1670	K01952	purL, PFAS	phosphoribosylformylglycinamidine synthase	6.3.5.3	Metabolism; Nucleotide metabolism; Purine metabolism [PATH:ko00230] Metabolism; Global and overview maps; Metabolic pathways [PATH:ko01100] Metabolism; Global and overview maps; Biosynthesis of secondary metabolites [PATH:ko01110] Metabolism; Global and overview maps; Biosynthesis of antibiotics [PATH:ko01130]
GM001967	99.6	2e-128	lcs:LCBD_1949	K01952	purL, PFAS	phosphoribosylformylglycinamidine synthase	6.3.5.3	Metabolism; Nucleotide metabolism; Purine metabolism [PATH:ko00230] Metabolism; Global and overview maps; Metabolic pathways [PATH:ko01100] Metabolism; Global and overview maps; Biosynthesis of secondary metabolites [PATH:ko01110] Metabolism; Global and overview maps; Biosynthesis of antibiotics [PATH:ko01130]
GM001968	100	2.7e-41	lcs:LCBD_1950	K01952	purL, PFAS	phosphoribosylformylglycinamidine synthase	6.3.5.3	Metabolism; Nucleotide metabolism; Purine metabolism [PATH:ko00230] Metabolism; Global and overview maps; Metabolic pathways [PATH:ko01100] Metabolism; Global and overview maps; Biosynthesis of secondary metabolites [PATH:ko01110] Metabolism; Global and overview maps; Biosynthesis of antibiotics [PATH:ko01130]
GM001969	100	5.8e-134	lce:LC2W_1930	K01923	purC	phosphoribosylaminoimidazole-succinocarboxamide synthase	6.3.2.6	Metabolism; Nucleotide metabolism; Purine metabolism [PATH:ko00230] Metabolism; Global and overview maps; Metabolic pathways [PATH:ko01100] Metabolism; Global and overview maps; Biosynthesis of secondary metabolites [PATH:ko01110] Metabolism; Global and overview maps; Biosynthesis of antibiotics [PATH:ko01130]
GM001970	99.7	2.8e-212	lpi:LBPG_01031	K01589	purK	5-(carboxyamino)imidazole ribonucleotide synthase	6.3.4.18	Metabolism; Nucleotide metabolism; Purine metabolism [PATH:ko00230] Metabolism; Global and overview maps; Metabolic pathways [PATH:ko01100] Metabolism; Global and overview maps; Biosynthesis of secondary metabolites [PATH:ko01110] Metabolism; Global and overview maps; Biosynthesis of antibiotics [PATH:ko01130]
GM001971	100	1e-81	lcx:LCA12A_0088	K01588	purE	5-(carboxyamino)imidazole ribonucleotide mutase	5.4.99.18	Metabolism; Nucleotide metabolism; Purine metabolism [PATH:ko00230] Metabolism; Global and overview maps; Metabolic pathways [PATH:ko01100] Metabolism; Global and overview maps; Biosynthesis of secondary metabolites [PATH:ko01110] Metabolism; Global and overview maps; Biosynthesis of antibiotics [PATH:ko01130]
GM001972	99.5	1.5e-106	lcb:LCABL_19760	K16789	thiT	thiamine transporter	--
GM001973	100	6.8e-264	lcx:LCA12A_0090	K06609	iolT	MFS transporter, SP family, major inositol transporter	--
GM001974	100	0	lcz:LCAZH_1750	K08483	PTS-EI.PTSI, ptsI	phosphotransferase system, enzyme I, PtsI	2.7.3.9	Environmental Information Processing; Membrane transport; Phosphotransferase system (PTS) [PATH:ko02060]
GM001975	100	5.2e-40	lcs:LCBD_1957	K11189	PTS-HPR	phosphocarrier protein	--
GM001976	100	8.6e-29	lcx:LCA12A_0093
GM001977	99	0	lcz:LCAZH_1753	K03697	clpE	ATP-dependent Clp protease ATP-binding subunit ClpE	--
GM001978	100	7.3e-46	lca:LSEI_1763
GM001979	100	4e-305	lpi:LBPG_01040	K02837	prfC	peptide chain release factor 3	--
GM001980	100	2.4e-250	lcs:LCBD_1962	K03699	tlyC	putative hemolysin	--
GM001981	100	2.4e-214	lce:LC2W_1942
GM001982	98.6	4e-74	lcw:BN194_19510
GM001983	100	6.4e-95	lcz:LCAZH_1759
GM001984	100	1.1e-102	lcx:LCA12A_0101	K07586	ygaC	uncharacterized protein	--
GM001985	100	1.4e-144	lcl:LOCK919_1945	K03565	recX	regulatory protein	--
GM001986	99.6	9.6e-296	lcx:LCA12A_0103
GM001987	100	9.1e-58	lcx:LCA12A_0104
GM001988	100	3.6e-262	lcz:LCAZH_1765
GM001989	100	3.1e-80	lcl:LOCK919_1949
GM001990	100	4.4e-140	lcw:BN194_19610	K03489	yydK	GntR family transcriptional regulator, transcriptional regulator of bglA	--
GM001991	99.8	1.1e-288	lcz:LCAZH_1768	K01223	E3.2.1.86B, bglA	6-phospho-beta-glucosidase	3.2.1.86	Metabolism; Carbohydrate metabolism; Glycolysis / Gluconeogenesis [PATH:ko00010] Metabolism; Carbohydrate metabolism; Starch and sucrose metabolism [PATH:ko00500]
GM001992	100	7.5e-260	lpi:LBPG_01053	K02761	PTS-Cel-EIIC, celB, chbC	PTS system, cellobiose-specific IIC component	--	Metabolism; Carbohydrate metabolism; Starch and sucrose metabolism [PATH:ko00500] Environmental Information Processing; Membrane transport; Phosphotransferase system (PTS) [PATH:ko02060]
GM001993	100	3.6e-87	lcb:LCABL_19990
GM001994	100	7.8e-51	lcz:LCAZH_1771	K02759	PTS-Cel-EIIA, celC, chbA	PTS system, cellobiose-specific IIA component	2.7.1.196 2.7.1.205	Metabolism; Carbohydrate metabolism; Starch and sucrose metabolism [PATH:ko00500] Environmental Information Processing; Membrane transport; Phosphotransferase system (PTS) [PATH:ko02060]
GM001995	100	1.7e-50	lcs:LCBD_1977	K02760	PTS-Cel-EIIB, celA, chbB	PTS system, cellobiose-specific IIB component	2.7.1.196 2.7.1.205	Metabolism; Carbohydrate metabolism; Starch and sucrose metabolism [PATH:ko00500] Environmental Information Processing; Membrane transport; Phosphotransferase system (PTS) [PATH:ko02060]
GM001996	99.8	0	lca:LSEI_1784	K00158	E1.2.3.3, poxL	pyruvate oxidase	1.2.3.3	Metabolism; Carbohydrate metabolism; Pyruvate metabolism [PATH:ko00620] Metabolism; Global and overview maps; Metabolic pathways [PATH:ko01100]
GM001997	97.3	1.8e-10	lcl:LOCK919_1956
GM001998	99.7	3.8e-220	lce:LC2W_1960	K01641	E2.3.3.10	hydroxymethylglutaryl-CoA synthase	2.3.3.10	Metabolism; Lipid metabolism; Synthesis and degradation of ketone bodies [PATH:ko00072] Metabolism; Amino acid metabolism; Valine, leucine and isoleucine degradation [PATH:ko00280] Metabolism; Carbohydrate metabolism; Butanoate metabolism [PATH:ko00650] Metabolism; Metabolism of terpenoids and polyketides; Terpenoid backbone biosynthesis [PATH:ko00900] Metabolism; Global and overview maps; Metabo…
GM001999	100	2.3e-234	lpap:LBPC_1702	K00054	mvaA	hydroxymethylglutaryl-CoA reductase	1.1.1.88	Metabolism; Metabolism of terpenoids and polyketides; Terpenoid backbone biosynthesis [PATH:ko00900] Metabolism; Global and overview maps; Biosynthesis of secondary metabolites [PATH:ko01110] Metabolism; Global and overview maps; Biosynthesis of antibiotics [PATH:ko01130]
GM002000	99.7	1.3e-212	lpap:LBPC_1703	K00626	E2.3.1.9, atoB	acetyl-CoA C-acetyltransferase	2.3.1.9	Metabolism; Lipid metabolism; Fatty acid degradation [PATH:ko00071] Metabolism; Lipid metabolism; Synthesis and degradation of ketone bodies [PATH:ko00072] Metabolism; Amino acid metabolism; Valine, leucine and isoleucine degradation [PATH:ko00280] Metabolism; Amino acid metabolism; Lysine degradation [PATH:ko00310] Metabolism; Xenobiotics biodegradation and metabolism; Benzoate degradation [PATH…
GM002001	100	1.2e-48	lce:LC2W_1963
GM002002	99.3	1.2e-159	lpap:LBPC_1705
GM002003	98.9	1.3e-101	lcl:LOCK919_1962	K07448	mrr	restriction system protein	--
GM002004	99.3	2.3e-155	lcl:LOCK919_1963
GM002005	99.7	2e-213	lca:LSEI_1792	K01439	dapE	succinyl-diaminopimelate desuccinylase	3.5.1.18	Metabolism; Amino acid metabolism; Lysine biosynthesis [PATH:ko00300] Metabolism; Global and overview maps; Metabolic pathways [PATH:ko01100] Metabolism; Global and overview maps; Microbial metabolism in diverse environments [PATH:ko01120] Metabolism; Global and overview maps; Biosynthesis of amino acids [PATH:ko01230]
GM002006	100	2.5e-106	lcs:LCBD_1989
GM002008	99.7	1.9e-216	lpq:AF91_05200
GM002009	100	6.2e-26	lca:LSEI_1334
GM002010	100	6.9e-80	lce:LC2W_1970
GM002011	100	1.1e-85	lcs:LCBD_1991	K03095	sprL	SprT-like protein	--
GM002012	100	1.3e-133	lpq:AF91_04895	K05833	ABC.X4.A	putative ABC transport system ATP-binding protein	--
GM002013	100	1.9e-158	lpq:AF91_04890	K05832	ABC.X4.P	putative ABC transport system permease protein	--
GM002014	100	4.3e-180	lpq:AF91_04885	K01989	ABC.X4.S	putative ABC transport system substrate-binding protein	--
GM002015	99.3	4.4e-76	lcw:BN194_19810
GM002016	99.7	0	lpap:LBPC_1716	K01537	E3.6.3.8	Ca2+-transporting ATPase	3.6.3.8
GM002017	99.7	2.7e-218	lcw:BN194_19830
GM002018	100	1.4e-152	lce:LC2W_1980	K01916	nadE	NAD+ synthase	6.3.1.5	Metabolism; Metabolism of cofactors and vitamins; Nicotinate and nicotinamide metabolism [PATH:ko00760] Metabolism; Global and overview maps; Metabolic pathways [PATH:ko01100]
GM002019	99.7	3.7e-201	lpq:AF91_04860
GM002020	99.8	9.8e-282	lpq:AF91_04855	K00763	pncB, NAPRT1	nicotinate phosphoribosyltransferase	6.3.4.21	Metabolism; Metabolism of cofactors and vitamins; Nicotinate and nicotinamide metabolism [PATH:ko00760] Metabolism; Global and overview maps; Metabolic pathways [PATH:ko01100]
GM002021	90.7	3.6e-14	lpq:AF91_05875
GM002022	100	1.2e-125	lpap:LBPC_1722	K03710	K03710	GntR family transcriptional regulator	--
GM002023	100	3.8e-217	lcs:LCBD_2005	K01443	nagA, AMDHD2	N-acetylglucosamine-6-phosphate deacetylase	3.5.1.25	Metabolism; Carbohydrate metabolism; Amino sugar and nucleotide sugar metabolism [PATH:ko00520] Metabolism; Global and overview maps; Biosynthesis of antibiotics [PATH:ko01130]
GM002024	100	5.9e-140	lcs:LCBD_2006	K00286	proC	pyrroline-5-carboxylate reductase	1.5.1.2	Metabolism; Amino acid metabolism; Arginine and proline metabolism [PATH:ko00330] Metabolism; Global and overview maps; Metabolic pathways [PATH:ko01100] Metabolism; Global and overview maps; Biosynthesis of secondary metabolites [PATH:ko01110] Metabolism; Global and overview maps; Biosynthesis of antibiotics [PATH:ko01130] Metabolism; Global and overview maps; Biosynthesis of amino acids [PATH:k…
GM002025	99.8	0	lpap:LBPC_1725
GM002026	99	1.4e-163	lcw:BN194_19920
GM002027	100	7.2e-266	lcl:LOCK919_1985	K03305	TC.POT	proton-dependent oligopeptide transporter, POT family	--
GM002028	100	0	lcw:BN194_19940	K02003	ABC.CD.A	putative ABC transport system ATP-binding protein	--
GM002029	100	4.5e-66	lce:LC2W_1991
GM002030	100	2.1e-75	lcl:LOCK919_1990
GM002031	99.8	1.1e-269	lpap:LBPC_1731
GM002032	98.9	4.1e-230	lcl:LOCK919_1992	K01206	FUCA	alpha-L-fucosidase	3.2.1.51	Metabolism; Glycan biosynthesis and metabolism; Other glycan degradation [PATH:ko00511]
GM002033	100	9.5e-57	lcx:LCA12A_0674
GM002034	99.5	0	lcw:BN194_20000	K01610	E4.1.1.49, pckA	phosphoenolpyruvate carboxykinase (ATP)	4.1.1.49	Metabolism; Carbohydrate metabolism; Glycolysis / Gluconeogenesis [PATH:ko00010] Metabolism; Carbohydrate metabolism; Citrate cycle (TCA cycle) [PATH:ko00020] Metabolism; Carbohydrate metabolism; Pyruvate metabolism [PATH:ko00620] Metabolism; Energy metabolism; Carbon fixation in photosynthetic organisms [PATH:ko00710] Metabolism; Global and overview maps; Metabolic pathways [PATH:ko01100] Metabo…
GM002035	100	5.5e-24	lca:LSEI_1821
GM002036	99.4	0	lca:LSEI_1822	K04759	feoB	ferrous iron transport protein B	--
GM002037	99.4	9.3e-83	lcz:LCAZH_1816	K04758	feoA	ferrous iron transport protein A	--
GM002038	99.6	3.1e-138	lcb:LCABL_20460
GM002039	100	7.4e-117	lcs:LCBD_2023	K07118	K07118	uncharacterized protein	--
GM002040	99.4	7.8e-93	lce:LC2W_2004
GM002041	99.4	7.5e-271	lcs:LCBD_0339
GM002042	99.4	3.3e-92	lpi:LBPG_01098
GM002043	100	2.8e-50	lrh:LGG_00839
GM002044	77.8	1.1e-11	baco:OXB_0462
GM002045	100	1.5e-35	lrh:LGG_00813
GM002046	99.3	7.6e-246	lpq:AF91_04710	K01875	SARS, serS	seryl-tRNA synthetase	6.1.1.11	Genetic Information Processing; Translation; Aminoacyl-tRNA biosynthesis [PATH:ko00970]
GM002047	100	8.3e-303	lca:LSEI_1837
GM002048	99.8	1.3e-297	lpap:LBPC_1795
GM002049	99.6	1.3e-273	lcw:BN194_20120	K11733	lysP	lysine-specific permease	--
GM002050	99.6	4.5e-131	lpap:LBPC_1799	K01575	alsD, budA, aldC	acetolactate decarboxylase	4.1.1.5	Metabolism; Carbohydrate metabolism; Butanoate metabolism [PATH:ko00650] Metabolism; Carbohydrate metabolism; C5-Branched dibasic acid metabolism [PATH:ko00660]
GM002051	100	0	lca:LSEI_1841	K01652	E2.2.1.6L, ilvB, ilvG, ilvI	acetolactate synthase I/II/III large subunit	2.2.1.6	Metabolism; Amino acid metabolism; Valine, leucine and isoleucine biosynthesis [PATH:ko00290] Metabolism; Carbohydrate metabolism; Butanoate metabolism [PATH:ko00650] Metabolism; Carbohydrate metabolism; C5-Branched dibasic acid metabolism [PATH:ko00660] Metabolism; Metabolism of cofactors and vitamins; Pantothenate and CoA biosynthesis [PATH:ko00770] Metabolism; Global and overview maps; Metabol…
GM002052	100	1.7e-98	lpq:AF91_04675
GM002053	99.4	4.1e-97	lcx:LCA12A_2033
GM002054	100	1.5e-125	lpap:LBPC_0339
GM002055	99.4	9.9e-196	lcs:LCBD_2038
GM002056	100	2.7e-102	lcx:LCA12A_2035
GM002057	100	1.3e-19	lcs:LCBD_2040	K02913	RP-L33, MRPL33, rpmG	large subunit ribosomal protein L33	--	Genetic Information Processing; Translation; Ribosome [PATH:ko03010]
GM002058	99.5	1.4e-117	lpq:AF91_04650	K04564	SOD2	superoxide dismutase, Fe-Mn family	1.15.1.1	Environmental Information Processing; Signal transduction; MAPK signaling pathway - fly [PATH:ko04013] Environmental Information Processing; Signal transduction; FoxO signaling pathway [PATH:ko04068] Cellular Processes; Transport and catabolism; Peroxisome [PATH:ko04146] Organismal Systems; Aging; Longevity regulating pathway [PATH:ko04211] Organismal Systems; Aging; Longevity regulating pathway …
GM002059	98	3e-161	lcx:LCA12A_2038	K06180	rluD	23S rRNA pseudouridine1911/1915/1917 synthase	5.4.99.23
GM002060	100	2.8e-156	lpi:LBPG_01832
GM002061	99.5	3.6e-102	lcx:LCA12A_2040
GM002062	100	2.3e-74	lpap:LBPC_1811
GM002063	99.6	1.5e-154	lcl:LOCK919_2031	K05966	citG	triphosphoribosyl-dephospho-CoA synthase	2.4.2.52	Environmental Information Processing; Signal transduction; Two-component system [PATH:ko02020]
GM002064	100	6.1e-125	lpap:LBPC_1813
GM002065	99.8	3.2e-266	lcs:LCBD_2048	K01571	oadA	oxaloacetate decarboxylase, alpha subunit	4.1.1.112	Metabolism; Carbohydrate metabolism; Pyruvate metabolism [PATH:ko00620] Metabolism; Global and overview maps; Metabolic pathways [PATH:ko01100]
GM002066	98.4	5.8e-94	lca:LSEI_1856	K05964	citX	holo-ACP synthase	2.7.7.61	Environmental Information Processing; Signal transduction; Two-component system [PATH:ko02020]
GM002067	99.8	8.7e-289	lpap:LBPC_1816	K01643	citF	citrate lyase subunit alpha / citrate CoA-transferase	2.8.3.10	Environmental Information Processing; Signal transduction; Two-component system [PATH:ko02020]
GM002068	99.3	2.5e-152	lcl:LOCK919_2036	K01644	citE	citrate lyase subunit beta / citryl-CoA lyase	4.1.3.34	Environmental Information Processing; Signal transduction; Two-component system [PATH:ko02020]
GM002069	100	5.4e-49	lpap:LBPC_1818	K01646	citD	citrate lyase subunit gamma (acyl carrier protein)	--	Environmental Information Processing; Signal transduction; Two-component system [PATH:ko02020]
GM002070	99.1	1.3e-181	lcz:LCAZH_1856	K01910	citC	[citrate (pro-3S)-lyase] ligase	6.2.1.22	Environmental Information Processing; Signal transduction; Two-component system [PATH:ko02020]
GM002071	100	9.6e-17	lcs:LCBD_2054
GM002072	100	3.1e-203	lcz:LCAZH_1858	K01572	oadB	oxaloacetate decarboxylase, beta subunit	4.1.1.112	Metabolism; Carbohydrate metabolism; Pyruvate metabolism [PATH:ko00620] Metabolism; Global and overview maps; Metabolic pathways [PATH:ko01100]
GM002073	100	4.8e-69	lce:LC2W_2038
GM002074	100	4.5e-54	lpap:LBPC_1822
GM002075	100	9.1e-250	lpq:AF91_04565	K03300	TC.CITMHS	citrate-Mg2+:H+ or citrate-Ca2+:H+ symporter, CitMHS family	--
GM002076	100	7e-42	lpi:LBPG_01848
GM002077	100	2.2e-104	lcs:LCBD_2060	K07559	kptA	putative RNA 2'-phosphotransferase	2.7.1.-
GM002078	100	3.9e-89	lcx:LCA12A_2057
GM002079	98.5	1e-107	lpap:LBPC_1827	K06988	fno	8-hydroxy-5-deazaflavin:NADPH oxidoreductase	1.5.1.40
GM002080	100	1.7e-57	lcb:LCABL_20940	K10947	padR	PadR family transcriptional regulator, regulatory protein PadR	--
GM002081	94.4	5.6e-152	lpi:LBPG_01853
GM002082	99.6	3.1e-138	lcw:BN194_20460
GM002083	99	8.4e-170	lru:HMPREF0538_22272	K01990	ABC-2.A	ABC-2 type transport system ATP-binding protein	--
GM002084	99.4	7.2e-302	lpap:LBPC_1833	K01992	ABC-2.P	ABC-2 type transport system permease protein	--
GM002085	99.5	4.1e-115	lca:LSEI_1875	K09017	rutR	TetR/AcrR family transcriptional regulator	--
GM002086	98.9	1.2e-265	lpap:LBPC_1835
GM002087	100	5e-133	lpi:LBPG_01859	K07090	K07090	uncharacterized protein	--
GM002088	98.8	1.2e-185	lcl:LOCK919_2056
[truncated: 1,044 more rows]

## Sheet: ATCC334
Supplementary Table 5. The KEGG database annotation results of ATCC334
Gene_id	Identity	E_value	Kegg_geneID	Ko_id	Ko_name	Ko_defi	Ko_EC	Ko_class
Lacticaseibacillus_paracasei_ATCC334_GM000001	100	6.1e-254	lca:LSEI_0001	K02313	dnaA	chromosomal replication initiator protein	--	Environmental Information Processing; Signal transduction; Two-component system [PATH:ko02020] Cellular Processes; Cell growth and death; Cell cycle - Caulobacter [PATH:ko04112]
Lacticaseibacillus_paracasei_ATCC334_GM000002	100	6.4e-204	lca:LSEI_0002	K02338	dnaN	DNA polymerase III subunit beta	2.7.7.7	Metabolism; Nucleotide metabolism; Purine metabolism [PATH:ko00230] Metabolism; Nucleotide metabolism; Pyrimidine metabolism [PATH:ko00240] Metabolism; Global and overview maps; Metabolic pathways [PATH:ko01100] Genetic Information Processing; Replication and repair; DNA replication [PATH:ko03030] Genetic Information Processing; Replication and repair; Mismatch repair [PATH:ko03430] Genetic Infor…
Lacticaseibacillus_paracasei_ATCC334_GM000003	100	2e-31	lcs:LCBD_0003
Lacticaseibacillus_paracasei_ATCC334_GM000004	100	5.3e-203	lpap:LBPC_0004	K03629	recF	DNA replication and repair protein RecF	--	Genetic Information Processing; Replication and repair; Homologous recombination [PATH:ko03440]
Lacticaseibacillus_paracasei_ATCC334_GM000005	99.8	0	lca:LSEI_0005	K02470	gyrB	DNA gyrase subunit B	5.99.1.3
Lacticaseibacillus_paracasei_ATCC334_GM000006	100	0	lca:LSEI_0006	K02469	gyrA	DNA gyrase subunit A	5.99.1.3
Lacticaseibacillus_paracasei_ATCC334_GM000007	100	4.3e-126	lca:LSEI_0007	K01619	deoC, DERA	deoxyribose-phosphate aldolase	4.1.2.4	Metabolism; Carbohydrate metabolism; Pentose phosphate pathway [PATH:ko00030]
Lacticaseibacillus_paracasei_ATCC334_GM000008	100	1.4e-74	lcw:BN194_00090	K03111	ssb	single-strand DNA-binding protein	--	Genetic Information Processing; Replication and repair; DNA replication [PATH:ko03030] Genetic Information Processing; Replication and repair; Mismatch repair [PATH:ko03430] Genetic Information Processing; Replication and repair; Homologous recombination [PATH:ko03440]
Lacticaseibacillus_paracasei_ATCC334_GM000009	100	5.2e-49	lcx:LCA12A_0625	K02990	RP-S6, MRPS6, rpsF	small subunit ribosomal protein S6	--	Genetic Information Processing; Translation; Ribosome [PATH:ko03010]
Lacticaseibacillus_paracasei_ATCC334_GM000010	100	1.4e-88	lpap:LBPC_0011	K03111	ssb	single-strand DNA-binding protein	--	Genetic Information Processing; Replication and repair; DNA replication [PATH:ko03030] Genetic Information Processing; Replication and repair; Mismatch repair [PATH:ko03430] Genetic Information Processing; Replication and repair; Homologous recombination [PATH:ko03440]
Lacticaseibacillus_paracasei_ATCC334_GM000011	100	2e-35	lcl:LOCK919_0014	K02963	RP-S18, MRPS18, rpsR	small subunit ribosomal protein S18	--	Genetic Information Processing; Translation; Ribosome [PATH:ko03010]
Lacticaseibacillus_paracasei_ATCC334_GM000012	100	0	lca:LSEI_0012	K00425	cydA	cytochrome bd ubiquinol oxidase subunit I	1.10.3.14	Metabolism; Energy metabolism; Oxidative phosphorylation [PATH:ko00190] Metabolism; Global and overview maps; Metabolic pathways [PATH:ko01100] Environmental Information Processing; Signal transduction; Two-component system [PATH:ko02020]
Lacticaseibacillus_paracasei_ATCC334_GM000013	100	6.8e-29	lca:LSEI_0013
Lacticaseibacillus_paracasei_ATCC334_GM000014	100	2.1e-105	lpap:LBPC_0018
Lacticaseibacillus_paracasei_ATCC334_GM000015	100	2.9e-124	lca:LSEI_0319
Lacticaseibacillus_paracasei_ATCC334_GM000016	100	3.9e-44	lpq:AF91_14340
Lacticaseibacillus_paracasei_ATCC334_GM000017	100	1.1e-142	lca:LSEI_0020	K21471	cwlO	peptidoglycan DL-endopeptidase CwlO	3.4.-.-
Lacticaseibacillus_paracasei_ATCC334_GM000018	100	0	lca:LSEI_0021	K02004	ABC.CD.P	putative ABC transport system permease protein	--
Lacticaseibacillus_paracasei_ATCC334_GM000019	100	6e-128	lpq:AF91_14355	K02003	ABC.CD.A	putative ABC transport system ATP-binding protein	--
Lacticaseibacillus_paracasei_ATCC334_GM000020	100	1.8e-98	lca:LSEI_0023
Lacticaseibacillus_paracasei_ATCC334_GM000021	100	8.1e-153	lpq:AF91_14365
Lacticaseibacillus_paracasei_ATCC334_GM000022	100	5.6e-49	lpap:LBPC_0025
Lacticaseibacillus_paracasei_ATCC334_GM000023	100	5.1e-128	lca:LSEI_0026	K07090	K07090	uncharacterized protein	--
Lacticaseibacillus_paracasei_ATCC334_GM000024	100	2e-103	lpap:LBPC_0027
Lacticaseibacillus_paracasei_ATCC334_GM000025	100	1e-164	lpq:AF91_14385
Lacticaseibacillus_paracasei_ATCC334_GM000026	100	5e-113	lca:LSEI_0029
Lacticaseibacillus_paracasei_ATCC334_GM000027	100	3.9e-240	lca:LSEI_0030	K03322	mntH	manganese transport protein	--
Lacticaseibacillus_paracasei_ATCC334_GM000028	100	1.9e-58	lpap:LBPC_0031
Lacticaseibacillus_paracasei_ATCC334_GM000029	100	5.2e-59	lcw:BN194_00400
Lacticaseibacillus_paracasei_ATCC334_GM000030	100	1.5e-287	lca:LSEI_0033	K08659	pepDA, pepDB	dipeptidase	3.4.-.-
Lacticaseibacillus_paracasei_ATCC334_GM000031	100	6e-111	lca:LSEI_0034
Lacticaseibacillus_paracasei_ATCC334_GM000032	100	1.3e-102	lcs:LCBD_0043
Lacticaseibacillus_paracasei_ATCC334_GM000034	100	2.4e-261	lca:LSEI_0041
Lacticaseibacillus_paracasei_ATCC334_GM000035	100	3.7e-93	lca:LSEI_0042
Lacticaseibacillus_paracasei_ATCC334_GM000039	100	3e-41	lcl:LOCK919_0051
Lacticaseibacillus_paracasei_ATCC334_GM000040	100	4.3e-82	lca:LSEI_0049	K07052	K07052	uncharacterized protein	--
Lacticaseibacillus_paracasei_ATCC334_GM000042	100	3.7e-116	lcx:LCA12A_0991	K01625	eda	2-dehydro-3-deoxyphosphogluconate aldolase / (4S)-4-hydroxy-2-oxoglutarate aldolase	4.1.2.14 4.1.3.42	Metabolism; Carbohydrate metabolism; Pentose phosphate pathway [PATH:ko00030] Metabolism; Carbohydrate metabolism; Glyoxylate and dicarboxylate metabolism [PATH:ko00630] Metabolism; Global and overview maps; Metabolic pathways [PATH:ko01100] Metabolism; Global and overview maps; Microbial metabolism in diverse environments [PATH:ko01120] Metabolism; Global and overview maps; Carbon metabolism [PA…
Lacticaseibacillus_paracasei_ATCC334_GM000043	100	4.2e-126	lca:LSEI_0052
Lacticaseibacillus_paracasei_ATCC334_GM000044	100	1.8e-55	lca:LSEI_0054
Lacticaseibacillus_paracasei_ATCC334_GM000045	100	4.1e-264	lca:LSEI_0057	K06147	ABCB-BAC	ATP-binding cassette, subfamily B, bacterial	--
Lacticaseibacillus_paracasei_ATCC334_GM000046	100	1.2e-244	lca:LSEI_0058
Lacticaseibacillus_paracasei_ATCC334_GM000047	100	0	lca:LSEI_0060	K06994	K06994	putative drug exporter of the RND superfamily	--
Lacticaseibacillus_paracasei_ATCC334_GM000048	100	4.5e-108	lce:LC2W_0056
Lacticaseibacillus_paracasei_ATCC334_GM000049	100	9.5e-39	lcl:LOCK919_0068
Lacticaseibacillus_paracasei_ATCC334_GM000050	100	9.1e-110	lca:LSEI_0063	K05846	opuBD	osmoprotectant transport system permease protein	--	Environmental Information Processing; Membrane transport; ABC transporters [PATH:ko02010]
Lacticaseibacillus_paracasei_ATCC334_GM000051	100	2.3e-172	lcw:BN194_00670	K05845	opuC	osmoprotectant transport system substrate-binding protein	--	Environmental Information Processing; Membrane transport; ABC transporters [PATH:ko02010]
Lacticaseibacillus_paracasei_ATCC334_GM000052	100	2.9e-105	lce:LC2W_0060	K05846	opuBD	osmoprotectant transport system permease protein	--	Environmental Information Processing; Membrane transport; ABC transporters [PATH:ko02010]
Lacticaseibacillus_paracasei_ATCC334_GM000053	100	1.4e-231	lca:LSEI_0066	K05847	opuA	osmoprotectant transport system ATP-binding protein	--	Environmental Information Processing; Membrane transport; ABC transporters [PATH:ko02010]
Lacticaseibacillus_paracasei_ATCC334_GM000054	100	1e-26	lcx:LCA12A_1005
Lacticaseibacillus_paracasei_ATCC334_GM000055	100	0	lca:LSEI_0070	K01534	zntA	Cd2+/Zn2+-exporting ATPase	3.6.3.3 3.6.3.5
Lacticaseibacillus_paracasei_ATCC334_GM000056	100	1.1e-33	lpq:AF91_14530
Lacticaseibacillus_paracasei_ATCC334_GM000057	100	4.7e-102	lca:LSEI_0072
Lacticaseibacillus_paracasei_ATCC334_GM000058	100	4.9e-116	lca:LSEI_0073	K21562	flp	CRP/FNR family transcriptional regulator, anaerobic regulatory protein	--
Lacticaseibacillus_paracasei_ATCC334_GM000059	100	4.1e-141	lca:LSEI_0074	K01695	trpA	tryptophan synthase alpha chain	4.2.1.20	Metabolism; Amino acid metabolism; Glycine, serine and threonine metabolism [PATH:ko00260] Metabolism; Amino acid metabolism; Phenylalanine, tyrosine and tryptophan biosynthesis [PATH:ko00400] Metabolism; Global and overview maps; Metabolic pathways [PATH:ko01100] Metabolism; Global and overview maps; Biosynthesis of secondary metabolites [PATH:ko01110] Metabolism; Global and overview maps; Biosy…
Lacticaseibacillus_paracasei_ATCC334_GM000060	100	1.6e-229	lca:LSEI_0075	K01696	trpB	tryptophan synthase beta chain	4.2.1.20	Metabolism; Amino acid metabolism; Glycine, serine and threonine metabolism [PATH:ko00260] Metabolism; Amino acid metabolism; Phenylalanine, tyrosine and tryptophan biosynthesis [PATH:ko00400] Metabolism; Global and overview maps; Metabolic pathways [PATH:ko01100] Metabolism; Global and overview maps; Biosynthesis of secondary metabolites [PATH:ko01110] Metabolism; Global and overview maps; Biosy…
Lacticaseibacillus_paracasei_ATCC334_GM000061	100	3.6e-99	lca:LSEI_0076	K01817	trpF	phosphoribosylanthranilate isomerase	5.3.1.24	Metabolism; Amino acid metabolism; Phenylalanine, tyrosine and tryptophan biosynthesis [PATH:ko00400] Metabolism; Global and overview maps; Metabolic pathways [PATH:ko01100] Metabolism; Global and overview maps; Biosynthesis of secondary metabolites [PATH:ko01110] Metabolism; Global and overview maps; Biosynthesis of antibiotics [PATH:ko01130] Metabolism; Global and overview maps; Biosynthesis of…
Lacticaseibacillus_paracasei_ATCC334_GM000062	100	7.1e-138	lca:LSEI_0077	K01609	trpC	indole-3-glycerol phosphate synthase	4.1.1.48	Metabolism; Amino acid metabolism; Phenylalanine, tyrosine and tryptophan biosynthesis [PATH:ko00400] Metabolism; Global and overview maps; Metabolic pathways [PATH:ko01100] Metabolism; Global and overview maps; Biosynthesis of secondary metabolites [PATH:ko01110] Metabolism; Global and overview maps; Biosynthesis of antibiotics [PATH:ko01130] Metabolism; Global and overview maps; Biosynthesis of…
Lacticaseibacillus_paracasei_ATCC334_GM000063	100	3.9e-184	lca:LSEI_0078	K00766	trpD	anthranilate phosphoribosyltransferase	2.4.2.18	Metabolism; Amino acid metabolism; Phenylalanine, tyrosine and tryptophan biosynthesis [PATH:ko00400] Metabolism; Global and overview maps; Metabolic pathways [PATH:ko01100] Metabolism; Global and overview maps; Biosynthesis of secondary metabolites [PATH:ko01110] Metabolism; Global and overview maps; Biosynthesis of antibiotics [PATH:ko01130] Metabolism; Global and overview maps; Biosynthesis of…
Lacticaseibacillus_paracasei_ATCC334_GM000064	100	1.3e-209	lca:LSEI_0079
Lacticaseibacillus_paracasei_ATCC334_GM000065	99.8	0	lpi:LBPG_01633
Lacticaseibacillus_paracasei_ATCC334_GM000066	100	2.2e-107	lcw:BN194_00880
Lacticaseibacillus_paracasei_ATCC334_GM000067	100	2.8e-125	lca:LSEI_0083
Lacticaseibacillus_paracasei_ATCC334_GM000068	100	4e-81	lca:LSEI_0084
Lacticaseibacillus_paracasei_ATCC334_GM000069	100	1.4e-14	lca:LSEI_0085
Lacticaseibacillus_paracasei_ATCC334_GM000070	100	2.8e-57	lca:LSEI_0088
Lacticaseibacillus_paracasei_ATCC334_GM000071	100	7.7e-193	lca:LSEI_1195
Lacticaseibacillus_paracasei_ATCC334_GM000072	100	8.8e-141	lca:LSEI_0094	K00215	dapB	4-hydroxy-tetrahydrodipicolinate reductase	1.17.1.8	Metabolism; Biosynthesis of other secondary metabolites; Monobactam biosynthesis [PATH:ko00261] Metabolism; Amino acid metabolism; Lysine biosynthesis [PATH:ko00300] Metabolism; Global and overview maps; Metabolic pathways [PATH:ko01100] Metabolism; Global and overview maps; Biosynthesis of secondary metabolites [PATH:ko01110] Metabolism; Global and overview maps; Microbial metabolism in diverse …
Lacticaseibacillus_paracasei_ATCC334_GM000073	100	5.9e-168	lca:LSEI_0095	K01714	dapA	4-hydroxy-tetrahydrodipicolinate synthase	4.3.3.7	Metabolism; Biosynthesis of other secondary metabolites; Monobactam biosynthesis [PATH:ko00261] Metabolism; Amino acid metabolism; Lysine biosynthesis [PATH:ko00300] Metabolism; Global and overview maps; Metabolic pathways [PATH:ko01100] Metabolism; Global and overview maps; Biosynthesis of secondary metabolites [PATH:ko01110] Metabolism; Global and overview maps; Microbial metabolism in diverse …
Lacticaseibacillus_paracasei_ATCC334_GM000074	100	9.9e-221	lca:LSEI_0096	K05823	dapL	N-acetyldiaminopimelate deacetylase	3.5.1.47	Metabolism; Amino acid metabolism; Lysine biosynthesis [PATH:ko00300] Metabolism; Global and overview maps; Metabolic pathways [PATH:ko01100] Metabolism; Global and overview maps; Biosynthesis of secondary metabolites [PATH:ko01110] Metabolism; Global and overview maps; Biosynthesis of amino acids [PATH:ko01230]
Lacticaseibacillus_paracasei_ATCC334_GM000075	100	2.9e-90	lca:LSEI_0097	K00674	dapD	2,3,4,5-tetrahydropyridine-2,6-dicarboxylate N-succinyltransferase	2.3.1.117	Metabolism; Amino acid metabolism; Lysine biosynthesis [PATH:ko00300] Metabolism; Global and overview maps; Metabolic pathways [PATH:ko01100] Metabolism; Global and overview maps; Microbial metabolism in diverse environments [PATH:ko01120] Metabolism; Global and overview maps; Biosynthesis of amino acids [PATH:ko01230]
Lacticaseibacillus_paracasei_ATCC334_GM000076	100	3.8e-256	lca:LSEI_0098	K01586	lysA	diaminopimelate decarboxylase	4.1.1.20	Metabolism; Amino acid metabolism; Lysine biosynthesis [PATH:ko00300] Metabolism; Global and overview maps; Metabolic pathways [PATH:ko01100] Metabolism; Global and overview maps; Biosynthesis of secondary metabolites [PATH:ko01110] Metabolism; Global and overview maps; Microbial metabolism in diverse environments [PATH:ko01120] Metabolism; Global and overview maps; Biosynthesis of antibiotics [P…
Lacticaseibacillus_paracasei_ATCC334_GM000077	99.8	1.4e-258	lca:LSEI_0099	K00928	lysC	aspartate kinase	2.7.2.4	Metabolism; Amino acid metabolism; Glycine, serine and threonine metabolism [PATH:ko00260] Metabolism; Biosynthesis of other secondary metabolites; Monobactam biosynthesis [PATH:ko00261] Metabolism; Amino acid metabolism; Cysteine and methionine metabolism [PATH:ko00270] Metabolism; Amino acid metabolism; Lysine biosynthesis [PATH:ko00300] Metabolism; Global and overview maps; Metabolic pathways …
Lacticaseibacillus_paracasei_ATCC334_GM000078	100	3.3e-188	lca:LSEI_0100	K01778	dapF	diaminopimelate epimerase	5.1.1.7	Metabolism; Amino acid metabolism; Lysine biosynthesis [PATH:ko00300] Metabolism; Global and overview maps; Metabolic pathways [PATH:ko01100] Metabolism; Global and overview maps; Biosynthesis of secondary metabolites [PATH:ko01110] Metabolism; Global and overview maps; Microbial metabolism in diverse environments [PATH:ko01120] Metabolism; Global and overview maps; Biosynthesis of antibiotics [P…
Lacticaseibacillus_paracasei_ATCC334_GM000079	100	1.8e-197	lca:LSEI_0101	K00133	asd	aspartate-semialdehyde dehydrogenase	1.2.1.11	Metabolism; Amino acid metabolism; Glycine, serine and threonine metabolism [PATH:ko00260] Metabolism; Biosynthesis of other secondary metabolites; Monobactam biosynthesis [PATH:ko00261] Metabolism; Amino acid metabolism; Cysteine and methionine metabolism [PATH:ko00270] Metabolism; Amino acid metabolism; Lysine biosynthesis [PATH:ko00300] Metabolism; Global and overview maps; Metabolic pathways …
Lacticaseibacillus_paracasei_ATCC334_GM000080	100	6.2e-63	lpi:LBPG_01649
Lacticaseibacillus_paracasei_ATCC334_GM000081	100	1.5e-73	lpap:LBPC_0089
Lacticaseibacillus_paracasei_ATCC334_GM000082	100	4.5e-149	lca:LSEI_0105
Lacticaseibacillus_paracasei_ATCC334_GM000084	100	2e-96	lca:LSEI_0107
Lacticaseibacillus_paracasei_ATCC334_GM000085	100	1.1e-43	lca:LSEI_0108
Lacticaseibacillus_paracasei_ATCC334_GM000086	100	1e-267	lca:LSEI_0230
Lacticaseibacillus_paracasei_ATCC334_GM000087	100	7e-115	lca:LSEI_0110
Lacticaseibacillus_paracasei_ATCC334_GM000088	100	2.1e-163	lca:LSEI_0111	K01992	ABC-2.P	ABC-2 type transport system permease protein	--
Lacticaseibacillus_paracasei_ATCC334_GM000089	100	3.4e-28	lca:LSEI_0112
Lacticaseibacillus_paracasei_ATCC334_GM000090	100	8e-85	lca:LSEI_0113	K01992	ABC-2.P	ABC-2 type transport system permease protein	--
Lacticaseibacillus_paracasei_ATCC334_GM000091	100	3.8e-170	lca:LSEI_0114	K01990	ABC-2.A	ABC-2 type transport system ATP-binding protein	--
Lacticaseibacillus_paracasei_ATCC334_GM000092	100	0	lca:LSEI_0115	K22927	gdpP	cyclic-di-AMP phosphodiesterase GdpP	3.1.4.-
Lacticaseibacillus_paracasei_ATCC334_GM000093	100	1.9e-74	lpi:LBPG_01656	K02939	RP-L9, MRPL9, rplI	large subunit ribosomal protein L9	--	Genetic Information Processing; Translation; Ribosome [PATH:ko03010]
Lacticaseibacillus_paracasei_ATCC334_GM000094	100	9.4e-250	lcx:LCA12A_1046	K02314	dnaB	replicative DNA helicase	3.6.4.12	Genetic Information Processing; Replication and repair; DNA replication [PATH:ko03030] Cellular Processes; Cell growth and death; Cell cycle - Caulobacter [PATH:ko04112]
Lacticaseibacillus_paracasei_ATCC334_GM000095	100	7.9e-218	lca:LSEI_0118
Lacticaseibacillus_paracasei_ATCC334_GM000096	100	0	lca:LSEI_0119	K02808	PTS-Scr-EIIA, scrA, ptsS	PTS system, sucrose-specific IIA component	2.7.1.211	Metabolism; Carbohydrate metabolism; Starch and sucrose metabolism [PATH:ko00500] Environmental Information Processing; Membrane transport; Phosphotransferase system (PTS) [PATH:ko02060]
Lacticaseibacillus_paracasei_ATCC334_GM000097	100	1.1e-161	lca:LSEI_0120	K07106	murQ	N-acetylmuramic acid 6-phosphate etherase	4.2.1.126	Metabolism; Carbohydrate metabolism; Amino sugar and nucleotide sugar metabolism [PATH:ko00520] Metabolism; Global and overview maps; Metabolic pathways [PATH:ko01100]
Lacticaseibacillus_paracasei_ATCC334_GM000098	100	1.9e-155	lca:LSEI_0121
Lacticaseibacillus_paracasei_ATCC334_GM000099	100	9.7e-249	lcz:LCAZH_0130	K01939	purA, ADSS	adenylosuccinate synthase	6.3.4.4	Metabolism; Nucleotide metabolism; Purine metabolism [PATH:ko00230] Metabolism; Amino acid metabolism; Alanine, aspartate and glutamate metabolism [PATH:ko00250] Metabolism; Global and overview maps; Metabolic pathways [PATH:ko01100]
Lacticaseibacillus_paracasei_ATCC334_GM000100	100	0	lca:LSEI_0123	K01534	zntA	Cd2+/Zn2+-exporting ATPase	3.6.3.3 3.6.3.5
Lacticaseibacillus_paracasei_ATCC334_GM000101	100	9.7e-64	lpi:LBPG_01669
Lacticaseibacillus_paracasei_ATCC334_GM000102	100	0	lca:LSEI_0125	K01535	PMA1, PMA2	H+-transporting ATPase	7.1.2.1	Metabolism; Energy metabolism; Oxidative phosphorylation [PATH:ko00190]
Lacticaseibacillus_paracasei_ATCC334_GM000103	98.7	1.5e-163	lce:LC2W_0108
Lacticaseibacillus_paracasei_ATCC334_GM000104	100	1.1e-205	lca:LSEI_0127
Lacticaseibacillus_paracasei_ATCC334_GM000105	100	5.8e-34	lcl:LOCK919_0134
Lacticaseibacillus_paracasei_ATCC334_GM000106	99.7	5.1e-167	lca:LSEI_0129	K01990	ABC-2.A	ABC-2 type transport system ATP-binding protein	--
Lacticaseibacillus_paracasei_ATCC334_GM000107	100	1.1e-132	lca:LSEI_0130	K01992	ABC-2.P	ABC-2 type transport system permease protein	--
Lacticaseibacillus_paracasei_ATCC334_GM000108	100	0	lca:LSEI_0131	K21636	nrdD	ribonucleoside-triphosphate reductase (formate)	1.1.98.6	Metabolism; Nucleotide metabolism; Purine metabolism [PATH:ko00230] Metabolism; Nucleotide metabolism; Pyrimidine metabolism [PATH:ko00240] Metabolism; Global and overview maps; Metabolic pathways [PATH:ko01100]
Lacticaseibacillus_paracasei_ATCC334_GM000109	100	2.3e-104	lca:LSEI_0132
Lacticaseibacillus_paracasei_ATCC334_GM000110	100	1.1e-197	lca:LSEI_0133
Lacticaseibacillus_paracasei_ATCC334_GM000111	100	7.7e-193	lca:LSEI_1195
Lacticaseibacillus_paracasei_ATCC334_GM000112	100	6.4e-259	lca:LSEI_0136
Lacticaseibacillus_paracasei_ATCC334_GM000113	100	1.8e-264	lca:LSEI_0609
Lacticaseibacillus_paracasei_ATCC334_GM000114	100	4.7e-39	lca:LSEI_0138
Lacticaseibacillus_paracasei_ATCC334_GM000115	97.9	4.2e-43	lcw:BN194_01340
Lacticaseibacillus_paracasei_ATCC334_GM000116	100	9.7e-185	lca:LSEI_0140
Lacticaseibacillus_paracasei_ATCC334_GM000117	100	1.6e-209	lca:LSEI_0141
Lacticaseibacillus_paracasei_ATCC334_GM000118	100	4e-42	lce:LC2W_0126
Lacticaseibacillus_paracasei_ATCC334_GM000119	100	7.9e-204	lpq:AF91_14970	K01921	ddl	D-alanine-D-alanine ligase	6.3.2.4	Metabolism; Metabolism of other amino acids; D-Alanine metabolism [PATH:ko00473] Metabolism; Glycan biosynthesis and metabolism; Peptidoglycan biosynthesis [PATH:ko00550] Metabolism; Global and overview maps; Metabolic pathways [PATH:ko01100] Human Diseases; Drug resistance: Antimicrobial; Vancomycin resistance [PATH:ko01502]
Lacticaseibacillus_paracasei_ATCC334_GM000120	100	2.2e-89	lca:LSEI_0144	K00567	ogt, MGMT	methylated-DNA-[protein]-cysteine S-methyltransferase	2.1.1.63
Lacticaseibacillus_paracasei_ATCC334_GM000121	100	3.2e-191	lca:LSEI_0145	K03778	ldhA	D-lactate dehydrogenase	1.1.1.28	Metabolism; Carbohydrate metabolism; Pyruvate metabolism [PATH:ko00620] Metabolism; Global and overview maps; Microbial metabolism in diverse environments [PATH:ko01120]
Lacticaseibacillus_paracasei_ATCC334_GM000122	100	3e-44	lca:LSEI_0146
Lacticaseibacillus_paracasei_ATCC334_GM000123	100	1.2e-85	lca:LSEI_0147
Lacticaseibacillus_paracasei_ATCC334_GM000124	99.7	3.5e-168	lca:LSEI_0148	K00344	qor, CRYZ	NADPH2:quinone reductase	1.6.5.5
Lacticaseibacillus_paracasei_ATCC334_GM000125	100	5e-54	lca:LSEI_0149	K08987	K08987	putative membrane protein	--
Lacticaseibacillus_paracasei_ATCC334_GM000126	100	1.7e-54	lcw:BN194_01460
Lacticaseibacillus_paracasei_ATCC334_GM000127	100	6e-255	lcw:BN194_01470	K06901	pbuG	putative MFS transporter, AGZA family, xanthine/uracil permease	--
Lacticaseibacillus_paracasei_ATCC334_GM000128	100	3.7e-56	lcs:LCBD_0145	K09004	K09004	uncharacterized protein	--
Lacticaseibacillus_paracasei_ATCC334_GM000129	100	8.1e-178	lca:LSEI_0153	K15975	K15975	glyoxalase family protein	--
Lacticaseibacillus_paracasei_ATCC334_GM000130	100	4e-41	lpi:LBPG_01710
Lacticaseibacillus_paracasei_ATCC334_GM000131	100	4.9e-104	lca:LSEI_0155
Lacticaseibacillus_paracasei_ATCC334_GM000132	99.9	0	lca:LSEI_0156
Lacticaseibacillus_paracasei_ATCC334_GM000133	100	3e-56	lpap:LBPC_0143
Lacticaseibacillus_paracasei_ATCC334_GM000134	100	2.2e-131	lpap:LBPC_0144
Lacticaseibacillus_paracasei_ATCC334_GM000135	99.6	5e-133	lcw:BN194_01550
Lacticaseibacillus_paracasei_ATCC334_GM000136	100	1.4e-184	lca:LSEI_0160
Lacticaseibacillus_paracasei_ATCC334_GM000137	98.7	4.4e-35	lcl:LOCK919_0175
Lacticaseibacillus_paracasei_ATCC334_GM000138	99.4	2.5e-277	lcb:LCABL_01560
Lacticaseibacillus_paracasei_ATCC334_GM000139	100	2.5e-180	lca:LSEI_0163
Lacticaseibacillus_paracasei_ATCC334_GM000140	100	1.2e-57	lcb:LCABL_01580
Lacticaseibacillus_paracasei_ATCC334_GM000141	100	1.4e-253	lpi:LBPG_01722	K07478	ycaJ	putative ATPase	--
Lacticaseibacillus_paracasei_ATCC334_GM000142	100	9.3e-222	lca:LSEI_0166	K00925	ackA	acetate kinase	2.7.2.1	Metabolism; Metabolism of other amino acids; Taurine and hypotaurine metabolism [PATH:ko00430] Metabolism; Carbohydrate metabolism; Pyruvate metabolism [PATH:ko00620] Metabolism; Carbohydrate metabolism; Propanoate metabolism [PATH:ko00640] Metabolism; Energy metabolism; Methane metabolism [PATH:ko00680] Metabolism; Energy metabolism; Carbon fixation pathways in prokaryotes [PATH:ko00720] Metabol…
Lacticaseibacillus_paracasei_ATCC334_GM000143	100	1.6e-159	lca:LSEI_0167	K07313	pphA	serine/threonine protein phosphatase 1	3.1.3.16
Lacticaseibacillus_paracasei_ATCC334_GM000144	100	2.3e-138	lca:LSEI_0168	K07457	K07457	endonuclease III related protein	--
Lacticaseibacillus_paracasei_ATCC334_GM000145	100	4.1e-46	lca:LSEI_0169
Lacticaseibacillus_paracasei_ATCC334_GM000146	98.9	9.6e-142	lpi:LBPG_03029	K01421	yhgE	putative membrane protein	--
Lacticaseibacillus_paracasei_ATCC334_GM000147	99.8	6.4e-162	lcw:BN194_01660	K01421	yhgE	putative membrane protein	--
Lacticaseibacillus_paracasei_ATCC334_GM000148	100	5.6e-100	lcb:LCABL_01650
Lacticaseibacillus_paracasei_ATCC334_GM000149	100	1.3e-254	lca:LSEI_0172
Lacticaseibacillus_paracasei_ATCC334_GM000150	100	2.7e-19	lca:LSEI_0173
Lacticaseibacillus_paracasei_ATCC334_GM000151	100	0	lce:LC2W_0159	K01621	xfp, xpk	xylulose-5-phosphate/fructose-6-phosphate phosphoketolase	4.1.2.9 4.1.2.22	Metabolism; Carbohydrate metabolism; Pentose phosphate pathway [PATH:ko00030] Metabolism; Energy metabolism; Carbon fixation in photosynthetic organisms [PATH:ko00710] Metabolism; Global and overview maps; Metabolic pathways [PATH:ko01100] Metabolism; Global and overview maps; Microbial metabolism in diverse environments [PATH:ko01120]
Lacticaseibacillus_paracasei_ATCC334_GM000152	100	1.3e-303	lca:LSEI_0175	K15580	oppA, mppA	oligopeptide transport system substrate-binding protein	--	Human Diseases; Drug resistance: Antimicrobial; beta-Lactam resistance [PATH:ko01501] Environmental Information Processing; Membrane transport; ABC transporters [PATH:ko02010] Cellular Processes; Cellular community - prokaryotes; Quorum sensing [PATH:ko02024]
Lacticaseibacillus_paracasei_ATCC334_GM000153	99.6	5e-139	lca:LSEI_0176
Lacticaseibacillus_paracasei_ATCC334_GM000154	99.5	1.5e-92	lca:LSEI_0177
Lacticaseibacillus_paracasei_ATCC334_GM000155	99.8	8.3e-240	lca:LSEI_0178	K01990	ABC-2.A	ABC-2 type transport system ATP-binding protein	--
Lacticaseibacillus_paracasei_ATCC334_GM000156	100	9.2e-80	lca:LSEI_0179
Lacticaseibacillus_paracasei_ATCC334_GM000157	99.4	1.5e-79	lca:LSEI_0180
Lacticaseibacillus_paracasei_ATCC334_GM000158	100	2.5e-188	lca:LSEI_0181
Lacticaseibacillus_paracasei_ATCC334_GM000159	100	2.3e-284	lca:LSEI_0183	K06148	ABCC-BAC	ATP-binding cassette, subfamily C, bacterial	--
Lacticaseibacillus_paracasei_ATCC334_GM000160	100	6.8e-161	lca:LSEI_0184
Lacticaseibacillus_paracasei_ATCC334_GM000161	100	0	lca:LSEI_0185
Lacticaseibacillus_paracasei_ATCC334_GM000162	100	6.8e-261	lca:LSEI_0186
Lacticaseibacillus_paracasei_ATCC334_GM000163	100	1.4e-115	lpap:LBPC_0188
Lacticaseibacillus_paracasei_ATCC334_GM000164	100	1.6e-227	lca:LSEI_0188	K06872	K06872	uncharacterized protein	--
Lacticaseibacillus_paracasei_ATCC334_GM000165	97.1	6.6e-134	lca:LSEI_0189	K07090	K07090	uncharacterized protein	--
Lacticaseibacillus_paracasei_ATCC334_GM000166	100	7.3e-56	lca:LSEI_0190
Lacticaseibacillus_paracasei_ATCC334_GM000167	98.5	5.1e-30	lca:LSEI_0191
Lacticaseibacillus_paracasei_ATCC334_GM000168	100	1.4e-89	lca:LSEI_0192
Lacticaseibacillus_paracasei_ATCC334_GM000169	100	1e-52	lcs:LCBD_0182
Lacticaseibacillus_paracasei_ATCC334_GM000170	100	1.3e-83	lce:LC2W_0174
Lacticaseibacillus_paracasei_ATCC334_GM000171	100	1.3e-43	lpi:LBPG_03031
Lacticaseibacillus_paracasei_ATCC334_GM000172	100	4e-26	lcs:LCBD_0185
Lacticaseibacillus_paracasei_ATCC334_GM000173	100	6e-171	lcs:LCBD_0186
Lacticaseibacillus_paracasei_ATCC334_GM000174	100	1.3e-71	lcl:LOCK919_0214	K07006	K07006	uncharacterized protein	--
Lacticaseibacillus_paracasei_ATCC334_GM000175	100	3.2e-39	lpq:AF91_00355
Lacticaseibacillus_paracasei_ATCC334_GM000176	100	5.7e-83	lpi:LBPG_01759
Lacticaseibacillus_paracasei_ATCC334_GM000177	100	2.9e-26	lcl:LOCK919_0217
Lacticaseibacillus_paracasei_ATCC334_GM000178	100	3.1e-68	lcw:BN194_01940
Lacticaseibacillus_paracasei_ATCC334_GM000179	100	2.6e-70	lca:LSEI_0203
Lacticaseibacillus_paracasei_ATCC334_GM000180	100	4.8e-114	lca:LSEI_0204
Lacticaseibacillus_paracasei_ATCC334_GM000181	100	1.2e-152	lpi:LBPG_01764
Lacticaseibacillus_paracasei_ATCC334_GM000182	100	4.7e-119	lca:LSEI_0206	K01304	pcp	pyroglutamyl-peptidase	3.4.19.3
Lacticaseibacillus_paracasei_ATCC334_GM000183	100	3e-107	lcx:LCA12A_1149	K06988	fno	8-hydroxy-5-deazaflavin:NADPH oxidoreductase	1.5.1.40
Lacticaseibacillus_paracasei_ATCC334_GM000184	100	1.3e-127	lpap:LBPC_0210	K07009	K07009	uncharacterized protein	--
Lacticaseibacillus_paracasei_ATCC334_GM000185	100	6e-66	lca:LSEI_0209
Lacticaseibacillus_paracasei_ATCC334_GM000186	99.2	5.6e-132	lce:LC2W_0190	K03501	gidB, rsmG	16S rRNA (guanine527-N7)-methyltransferase	2.1.1.170
Lacticaseibacillus_paracasei_ATCC334_GM000187	99.6	5.2e-147	lca:LSEI_0211	K03497	parB, spo0J	chromosome partitioning protein, ParB family	--
Lacticaseibacillus_paracasei_ATCC334_GM000188	100	1.2e-137	lce:LC2W_0192	K03496	parA, soj	chromosome partitioning protein	--
Lacticaseibacillus_paracasei_ATCC334_GM000189	100	7.6e-157	lcz:LCAZH_0237	K03497	parB, spo0J	chromosome partitioning protein, ParB family	--
Lacticaseibacillus_paracasei_ATCC334_GM000190	100	4.8e-29	lpap:LBPC_0216
Lacticaseibacillus_paracasei_ATCC334_GM000191	100	8.4e-201	lca:LSEI_0215	K06942	ychF	ribosome-binding ATPase	--
Lacticaseibacillus_paracasei_ATCC334_GM000192	96.7	1.8e-131	lce:LC2W_0196
Lacticaseibacillus_paracasei_ATCC334_GM000193	100	4.1e-275	lca:LSEI_0217	K00088	IMPDH, guaB	IMP dehydrogenase	1.1.1.205	Metabolism; Nucleotide metabolism; Purine metabolism [PATH:ko00230] Metabolism; Xenobiotics biodegradation and metabolism; Drug metabolism - other enzymes [PATH:ko00983] Metabolism; Global and overview maps; Metabolic pathways [PATH:ko01100] Metabolism; Global and overview maps; Biosynthesis of secondary metabolites [PATH:ko01110]
Lacticaseibacillus_paracasei_ATCC334_GM000194	100	1.4e-77	lpap:LBPC_0220
Lacticaseibacillus_paracasei_ATCC334_GM000195	100	3.1e-121	lca:LSEI_0219
Lacticaseibacillus_paracasei_ATCC334_GM000196	100	1.3e-218	lcs:LCBD_0209
Lacticaseibacillus_paracasei_ATCC334_GM000197	100	2.7e-238	lcx:LCA12A_1163	K07258	dacC, dacA, dacD	serine-type D-Ala-D-Ala carboxypeptidase (penicillin-binding protein 5/6)	3.4.16.4	Metabolism; Glycan biosynthesis and metabolism; Peptidoglycan biosynthesis [PATH:ko00550] Metabolism; Global and overview maps; Metabolic pathways [PATH:ko01100]
Lacticaseibacillus_paracasei_ATCC334_GM000198	100	6.9e-80	lca:LSEI_0222	K03624	greA	transcription elongation factor GreA	--
Lacticaseibacillus_paracasei_ATCC334_GM000199	100	2e-293	lca:LSEI_0223	K01928	murE	UDP-N-acetylmuramoyl-L-alanyl-D-glutamate--2,6-diaminopimelate ligase	6.3.2.13	Metabolism; Amino acid metabolism; Lysine biosynthesis [PATH:ko00300] Metabolism; Glycan biosynthesis and metabolism; Peptidoglycan biosynthesis [PATH:ko00550]
Lacticaseibacillus_paracasei_ATCC334_GM000200	100	3.9e-141	lcx:LCA12A_1166	K01779	racD	aspartate racemase	5.1.1.13	Metabolism; Amino acid metabolism; Alanine, aspartate and glutamate metabolism [PATH:ko00250] Metabolism; Metabolism of terpenoids and polyketides; Nonribosomal peptide structures [PATH:ko01054]
Lacticaseibacillus_paracasei_ATCC334_GM000201	99.7	1.1e-163	lca:LSEI_0225
Lacticaseibacillus_paracasei_ATCC334_GM000202	100	7.7e-146	lca:LSEI_0226
Lacticaseibacillus_paracasei_ATCC334_GM000203	100	1.1e-169	lca:LSEI_0227	K00033	PGD, gnd, gntZ	6-phosphogluconate dehydrogenase	1.1.1.44 1.1.1.343	Metabolism; Carbohydrate metabolism; Pentose phosphate pathway [PATH:ko00030] Metabolism; Metabolism of other amino acids; Glutathione metabolism [PATH:ko00480] Metabolism; Global and overview maps; Metabolic pathways [PATH:ko01100] Metabolism; Global and overview maps; Biosynthesis of secondary metabolites [PATH:ko01110] Metabolism; Global and overview maps; Microbial metabolism in diverse envir…
Lacticaseibacillus_paracasei_ATCC334_GM000204	100	2e-304	lcx:LCA12A_1182	K00851	E2.7.1.12, gntK, idnK	gluconokinase	2.7.1.12	Metabolism; Carbohydrate metabolism; Pentose phosphate pathway [PATH:ko00030] Metabolism; Global and overview maps; Metabolic pathways [PATH:ko01100] Metabolism; Global and overview maps; Biosynthesis of secondary metabolites [PATH:ko01110] Metabolism; Global and overview maps; Microbial metabolism in diverse environments [PATH:ko01120] Metabolism; Global and overview maps; Biosynthesis of antibi…
Lacticaseibacillus_paracasei_ATCC334_GM000205	100	1.2e-212	lpq:AF91_00515	K03299	TC.GNTP	gluconate:H+ symporter, GntP family	--
Lacticaseibacillus_paracasei_ATCC334_GM000206	100	1e-267	lca:LSEI_0230
Lacticaseibacillus_paracasei_ATCC334_GM000207	99.8	6.6e-262	lca:LSEI_0231
Lacticaseibacillus_paracasei_ATCC334_GM000208	100	5.3e-152	lcs:LCBD_0231
Lacticaseibacillus_paracasei_ATCC334_GM000209	100	2.9e-130	lca:LSEI_0233
Lacticaseibacillus_paracasei_ATCC334_GM000210	100	6.1e-162	lca:LSEI_0234
Lacticaseibacillus_paracasei_ATCC334_GM000211	99.6	1.5e-148	lca:LSEI_0235
Lacticaseibacillus_paracasei_ATCC334_GM000212	100	0	lca:LSEI_0236
Lacticaseibacillus_paracasei_ATCC334_GM000213	100	7.1e-241	lpq:AF91_05200
Lacticaseibacillus_paracasei_ATCC334_GM000214	100	3.9e-259	lce:LC2W_0227
Lacticaseibacillus_paracasei_ATCC334_GM000215	99.7	8.6e-161	lcw:BN194_02460
Lacticaseibacillus_paracasei_ATCC334_GM000216	100	6.4e-198	lca:LSEI_0240
Lacticaseibacillus_paracasei_ATCC334_GM000217	100	1.3e-56	lcw:BN194_02480
Lacticaseibacillus_paracasei_ATCC334_GM000218	100	8.6e-130	lpap:LBPC_0234	K02074	ABC.ZM.A	zinc/manganese transport system ATP-binding protein	--
Lacticaseibacillus_paracasei_ATCC334_GM000219	100	3.7e-134	lca:LSEI_0243	K02075	ABC.ZM.P	zinc/manganese transport system permease protein	--
Lacticaseibacillus_paracasei_ATCC334_GM000220	100	2e-165	lca:LSEI_0244
Lacticaseibacillus_paracasei_ATCC334_GM000221	100	1.8e-161	lca:LSEI_0245	K00020	mmsB, HIBADH	3-hydroxyisobutyrate dehydrogenase	1.1.1.31	Metabolism; Amino acid metabolism; Valine, leucine and isoleucine degradation [PATH:ko00280] Metabolism; Global and overview maps; Metabolic pathways [PATH:ko01100]
Lacticaseibacillus_paracasei_ATCC334_GM000222	100	0	lcw:BN194_02530	K08602	pepF, pepB	oligoendopeptidase F	3.4.24.-
Lacticaseibacillus_paracasei_ATCC334_GM000223	100	5.4e-200	lcw:BN194_02540
Lacticaseibacillus_paracasei_ATCC334_GM000224	100	1.3e-237	lcw:BN194_02550	K03311	TC.LIVCS	branched-chain amino acid:cation transporter, LIVCS family	--
Lacticaseibacillus_paracasei_ATCC334_GM000225	100	4.1e-81	lcx:LCA12A_1192
Lacticaseibacillus_paracasei_ATCC334_GM000226	100	1.7e-133	lpi:LBPG_01811	K22103	glcR	DeoR family transcriptional regulator, carbon catabolite repression regulator	--
Lacticaseibacillus_paracasei_ATCC334_GM000227	100	5.4e-146	lcl:LOCK919_0269
Lacticaseibacillus_paracasei_ATCC334_GM000228	100	4.9e-133	lpq:AF91_00585
Lacticaseibacillus_paracasei_ATCC334_GM000229	100	6e-54	lca:LSEI_0253
Lacticaseibacillus_paracasei_ATCC334_GM000230	100	1.3e-107	lca:LSEI_0254	K03100	lepB	signal peptidase I	3.4.21.89	Cellular Processes; Cellular community - prokaryotes; Quorum sensing [PATH:ko02024] Genetic Information Processing; Folding, sorting and degradation; Protein export [PATH:ko03060]
Lacticaseibacillus_paracasei_ATCC334_GM000231	100	3.8e-178	lca:LSEI_0255
Lacticaseibacillus_paracasei_ATCC334_GM000232	100	2.9e-292	lca:LSEI_0256
Lacticaseibacillus_paracasei_ATCC334_GM000233	100	1.4e-135	lca:LSEI_0257
Lacticaseibacillus_paracasei_ATCC334_GM000234	100	2e-57	lcz:LCAZH_0285	K03671	trxA	thioredoxin 1	--	Organismal Systems; Immune system; NOD-like receptor signaling pathway [PATH:ko04621] Human Diseases; Cardiovascular diseases; Fluid shear stress and atherosclerosis [PATH:ko05418]
Lacticaseibacillus_paracasei_ATCC334_GM000235	100	7.8e-137	lpi:LBPG_02429
Lacticaseibacillus_paracasei_ATCC334_GM000236	99.4	8.4e-87	lca:LSEI_0263
Lacticaseibacillus_paracasei_ATCC334_GM000237	100	1.4e-214	lca:LSEI_0265	K01999	livK	branched-chain amino acid transport system substrate-binding protein	--	Environmental Information Processing; Membrane transport; ABC transporters [PATH:ko02010] Cellular Processes; Cellular community - prokaryotes; Quorum sensing [PATH:ko02024]
Lacticaseibacillus_paracasei_ATCC334_GM000238	100	6.4e-148	lpi:LBPG_02433	K01997	livH	branched-chain amino acid transport system permease protein	--	Environmental Information Processing; Membrane transport; ABC transporters [PATH:ko02010] Cellular Processes; Cellular community - prokaryotes; Quorum sensing [PATH:ko02024]
Lacticaseibacillus_paracasei_ATCC334_GM000239	100	1.4e-140	lpi:LBPG_02434	K01998	livM	branched-chain amino acid transport system permease protein	--	Environmental Information Processing; Membrane transport; ABC transporters [PATH:ko02010] Cellular Processes; Cellular community - prokaryotes; Quorum sensing [PATH:ko02024]
Lacticaseibacillus_paracasei_ATCC334_GM000240	100	7.6e-140	lcs:LCBD_0265	K01995	livG	branched-chain amino acid transport system ATP-binding protein	--	Environmental Information Processing; Membrane transport; ABC transporters [PATH:ko02010] Cellular Processes; Cellular community - prokaryotes; Quorum sensing [PATH:ko02024]
Lacticaseibacillus_paracasei_ATCC334_GM000241	100	1.2e-123	lcs:LCBD_0266	K01996	livF	branched-chain amino acid transport system ATP-binding protein	--	Environmental Information Processing; Membrane transport; ABC transporters [PATH:ko02010] Cellular Processes; Cellular community - prokaryotes; Quorum sensing [PATH:ko02024]
Lacticaseibacillus_paracasei_ATCC334_GM000242	100	1.7e-104	lca:LSEI_0270
Lacticaseibacillus_paracasei_ATCC334_GM000243	100	2.7e-78	lca:LSEI_0271
Lacticaseibacillus_paracasei_ATCC334_GM000244	100	3.1e-43	lca:LSEI_0774	K07483	K07483	transposase	--
Lacticaseibacillus_paracasei_ATCC334_GM000245	100	1.1e-67	lct:BI355_2258
Lacticaseibacillus_paracasei_ATCC334_GM000246	100	2.9e-56	lca:LSEI_0274
Lacticaseibacillus_paracasei_ATCC334_GM000247	100	2.5e-166	lcl:LOCK919_0288
Lacticaseibacillus_paracasei_ATCC334_GM000248	100	2.6e-241	lca:LSEI_0276	K02761	PTS-Cel-EIIC, celB, chbC	PTS system, cellobiose-specific IIC component	--	Metabolism; Carbohydrate metabolism; Starch and sucrose metabolism [PATH:ko00500] Environmental Information Processing; Membrane transport; Phosphotransferase system (PTS) [PATH:ko02060]
Lacticaseibacillus_paracasei_ATCC334_GM000249	100	2.1e-117	lca:LSEI_0277
Lacticaseibacillus_paracasei_ATCC334_GM000250	100	1.1e-115	lce:LC2W_0261	K01619	deoC, DERA	deoxyribose-phosphate aldolase	4.1.2.4	Metabolism; Carbohydrate metabolism; Pentose phosphate pathway [PATH:ko00030]
Lacticaseibacillus_paracasei_ATCC334_GM000251	100	1.3e-228	lca:LSEI_0279	K01839	deoB	phosphopentomutase	5.4.2.7	Metabolism; Carbohydrate metabolism; Pentose phosphate pathway [PATH:ko00030] Metabolism; Nucleotide metabolism; Purine metabolism [PATH:ko00230]
Lacticaseibacillus_paracasei_ATCC334_GM000252	100	2.5e-129	lcs:LCBD_0272	K03784	deoD	purine-nucleoside phosphorylase	2.4.2.1	Metabolism; Nucleotide metabolism; Purine metabolism [PATH:ko00230] Metabolism; Nucleotide metabolism; Pyrimidine metabolism [PATH:ko00240] Metabolism; Metabolism of cofactors and vitamins; Nicotinate and nicotinamide metabolism [PATH:ko00760] Metabolism; Global and overview maps; Metabolic pathways [PATH:ko01100] Metabolism; Global and overview maps; Biosynthesis of secondary metabolites [PATH:k…
Lacticaseibacillus_paracasei_ATCC334_GM000253	100	1.4e-182	lca:LSEI_0281	K21471	cwlO	peptidoglycan DL-endopeptidase CwlO	3.4.-.-
Lacticaseibacillus_paracasei_ATCC334_GM000254	100	5e-23	lcl:LOCK919_0295
Lacticaseibacillus_paracasei_ATCC334_GM000255	100	5.1e-26	lcl:LOCK919_0297
Lacticaseibacillus_paracasei_ATCC334_GM000256	100	4.4e-260	lca:LSEI_0285	K17869	nox2	NADH oxidase (H2O-forming)	1.6.3.4
Lacticaseibacillus_paracasei_ATCC334_GM000257	100	1.4e-160	lca:LSEI_0286
Lacticaseibacillus_paracasei_ATCC334_GM000258	100	2.1e-122	lca:LSEI_0287
Lacticaseibacillus_paracasei_ATCC334_GM000259	99.6	0	lcw:BN194_02880
Lacticaseibacillus_paracasei_ATCC334_GM000260	100	4.2e-233	lca:LSEI_0289	K02027	ABC.MS.S	multiple sugar transport system substrate-binding protein	--
Lacticaseibacillus_paracasei_ATCC334_GM000261	100	5.1e-87	lca:LSEI_0290
Lacticaseibacillus_paracasei_ATCC334_GM000262	99.8	0	lca:LSEI_0291	K12373	HEXA_B	hexosaminidase	3.2.1.52	Metabolism; Glycan biosynthesis and metabolism; Other glycan degradation [PATH:ko00511] Metabolism; Glycan biosynthesis and metabolism; Various types of N-glycan biosynthesis [PATH:ko00513] Metabolism; Carbohydrate metabolism; Amino sugar and nucleotide sugar metabolism [PATH:ko00520] Metabolism; Glycan biosynthesis and metabolism; Glycosaminoglycan degradation [PATH:ko00531] Metabolism; Glycan b…
Lacticaseibacillus_paracasei_ATCC334_GM000263	100	2.8e-203	lca:LSEI_0292	K01809	manA, MPI	mannose-6-phosphate isomerase	5.3.1.8	Metabolism; Carbohydrate metabolism; Fructose and mannose metabolism [PATH:ko00051] Metabolism; Carbohydrate metabolism; Amino sugar and nucleotide sugar metabolism [PATH:ko00520] Metabolism; Global and overview maps; Metabolic pathways [PATH:ko01100] Metabolism; Global and overview maps; Biosynthesis of secondary metabolites [PATH:ko01110] Metabolism; Global and overview maps; Biosynthesis of an…
Lacticaseibacillus_paracasei_ATCC334_GM000264	100	2.9e-124	lca:LSEI_0319
Lacticaseibacillus_paracasei_ATCC334_GM000265	100	1.6e-94	lca:LSEI_0294	K16925	ykoE	energy-coupling factor transport system substrate-specific component	--
Lacticaseibacillus_paracasei_ATCC334_GM000266	100	8.5e-248	lca:LSEI_0295	K16786	ecfA1	energy-coupling factor transport system ATP-binding protein	3.6.3.-	Environmental Information Processing; Membrane transport; ABC transporters [PATH:ko02010]
Lacticaseibacillus_paracasei_ATCC334_GM000267	100	8.3e-99	lca:LSEI_0296	K16785	ecfT	energy-coupling factor transport system permease protein	--	Environmental Information Processing; Membrane transport; ABC transporters [PATH:ko02010]
Lacticaseibacillus_paracasei_ATCC334_GM000268	100	1.7e-130	lca:LSEI_0297	K03707	tenA	thiaminase (transcriptional activator TenA)	3.5.99.2	Metabolism; Metabolism of cofactors and vitamins; Thiamine metabolism [PATH:ko00730] Metabolism; Global and overview maps; Metabolic pathways [PATH:ko01100]
Lacticaseibacillus_paracasei_ATCC334_GM000269	100	1.9e-83	lcl:LOCK919_0337
Lacticaseibacillus_paracasei_ATCC334_GM000270	100	4.6e-151	lca:LSEI_0299	K00878	thiM	hydroxyethylthiazole kinase	2.7.1.50	Metabolism; Metabolism of cofactors and vitamins; Thiamine metabolism [PATH:ko00730] Metabolism; Global and overview maps; Metabolic pathways [PATH:ko01100]
Lacticaseibacillus_paracasei_ATCC334_GM000271	100	8.2e-108	lca:LSEI_0300	K00788	thiE	thiamine-phosphate pyrophosphorylase	2.5.1.3	Metabolism; Metabolism of cofactors and vitamins; Thiamine metabolism [PATH:ko00730] Metabolism; Global and overview maps; Metabolic pathways [PATH:ko01100]
Lacticaseibacillus_paracasei_ATCC334_GM000272	100	6.2e-148	lca:LSEI_0301	K00941	thiD	hydroxymethylpyrimidine/phosphomethylpyrimidine kinase	2.7.1.49 2.7.4.7	Metabolism; Metabolism of cofactors and vitamins; Thiamine metabolism [PATH:ko00730] Metabolism; Global and overview maps; Metabolic pathways [PATH:ko01100]
Lacticaseibacillus_paracasei_ATCC334_GM000273	99.8	9.1e-272	lpq:AF91_00915
Lacticaseibacillus_paracasei_ATCC334_GM000274	100	2.2e-187	lca:LSEI_0306	K02529	lacI, galR	LacI family transcriptional regulator	--
Lacticaseibacillus_paracasei_ATCC334_GM000275	99.2	1.1e-65	lcs:LCBD_0322	K06726	rbsD	D-ribose pyranase	5.4.99.62	Environmental Information Processing; Membrane transport; ABC transporters [PATH:ko02010]
Lacticaseibacillus_paracasei_ATCC334_GM000276	100	2.9e-281	lcs:LCBD_0323	K10441	rbsA	ribose transport system ATP-binding protein	3.6.3.17	Environmental Information Processing; Membrane transport; ABC transporters [PATH:ko02010]
Lacticaseibacillus_paracasei_ATCC334_GM000277	100	6.2e-155	lcs:LCBD_0324	K10440	rbsC	ribose transport system permease protein	--	Environmental Information Processing; Membrane transport; ABC transporters [PATH:ko02010]
Lacticaseibacillus_paracasei_ATCC334_GM000278	100	1.3e-162	lca:LSEI_0310	K10439	rbsB	ribose transport system substrate-binding protein	--	Environmental Information Processing; Membrane transport; ABC transporters [PATH:ko02010] Cellular Processes; Cell motility; Bacterial chemotaxis [PATH:ko02030]
Lacticaseibacillus_paracasei_ATCC334_GM000280	100	2.9e-162	lca:LSEI_0312	K00852	rbsK, RBKS	ribokinase	2.7.1.15	Metabolism; Carbohydrate metabolism; Pentose phosphate pathway [PATH:ko00030]
Lacticaseibacillus_paracasei_ATCC334_GM000281	100	0	lca:LSEI_0314	K21467	pbpC	penicillin-binding protein 3	--
Lacticaseibacillus_paracasei_ATCC334_GM000282	100	4.3e-236	lca:LSEI_0315
Lacticaseibacillus_paracasei_ATCC334_GM000283	100	3.4e-73	lcw:BN194_03350
Lacticaseibacillus_paracasei_ATCC334_GM000284	99.5	1.2e-105	lca:LSEI_0317
Lacticaseibacillus_paracasei_ATCC334_GM000285	100	6.7e-30	lce:LC2W_0326
Lacticaseibacillus_paracasei_ATCC334_GM000286	100	2.9e-124	lca:LSEI_0319
Lacticaseibacillus_paracasei_ATCC334_GM000287	100	7.2e-16	lcz:LCAZH_0371
Lacticaseibacillus_paracasei_ATCC334_GM000288	100	1.8e-270	lca:LSEI_0322	K00244	frdA	fumarate reductase flavoprotein subunit	1.3.5.4	Metabolism; Carbohydrate metabolism; Citrate cycle (TCA cycle) [PATH:ko00020] Metabolism; Energy metabolism; Oxidative phosphorylation [PATH:ko00190] Metabolism; Carbohydrate metabolism; Pyruvate metabolism [PATH:ko00620] Metabolism; Carbohydrate metabolism; Butanoate metabolism [PATH:ko00650] Metabolism; Energy metabolism; Carbon fixation pathways in prokaryotes [PATH:ko00720] Metabolism; Global…
Lacticaseibacillus_paracasei_ATCC334_GM000289	100	0	lca:LSEI_0324	K03483	mtlR	mannitol operon transcriptional antiterminator	--
Lacticaseibacillus_paracasei_ATCC334_GM000290	100	1.7e-50	lca:LSEI_0325	K02822	PTS-Ula-EIIB, ulaB, sgaB	PTS system, ascorbate-specific IIB component	2.7.1.194	Metabolism; Carbohydrate metabolism; Ascorbate and aldarate metabolism [PATH:ko00053] Metabolism; Global and overview maps; Metabolic pathways [PATH:ko01100] Metabolism; Global and overview maps; Microbial metabolism in diverse environments [PATH:ko01120] Environmental Information Processing; Membrane transport; Phosphotransferase system (PTS) [PATH:ko02060]
Lacticaseibacillus_paracasei_ATCC334_GM000291	100	1.3e-229	lpap:LBPC_0327	K03475	PTS-Ula-EIIC, ulaA, sgaT	PTS system, ascorbate-specific IIC component	--	Metabolism; Carbohydrate metabolism; Ascorbate and aldarate metabolism [PATH:ko00053] Metabolism; Global and overview maps; Metabolic pathways [PATH:ko01100] Metabolism; Global and overview maps; Microbial metabolism in diverse environments [PATH:ko01120] Environmental Information Processing; Membrane transport; Phosphotransferase system (PTS) [PATH:ko02060]
Lacticaseibacillus_paracasei_ATCC334_GM000292	100	3.1e-71	lca:LSEI_0327
Lacticaseibacillus_paracasei_ATCC334_GM000293	100	1.7e-161	lcs:LCBD_0351	K01624	FBA, fbaA	fructose-bisphosphate aldolase, class II	4.1.2.13	Metabolism; Carbohydrate metabolism; Glycolysis / Gluconeogenesis [PATH:ko00010] Metabolism; Carbohydrate metabolism; Pentose phosphate pathway [PATH:ko00030] Metabolism; Carbohydrate metabolism; Fructose and mannose metabolism [PATH:ko00051] Metabolism; Energy metabolism; Methane metabolism [PATH:ko00680] Metabolism; Energy metabolism; Carbon fixation in photosynthetic organisms [PATH:ko00710] M…
Lacticaseibacillus_paracasei_ATCC334_GM000294	100	4.3e-117	lpap:LBPC_0330
Lacticaseibacillus_paracasei_ATCC334_GM000295	99.6	1.5e-157	lca:LSEI_0330
Lacticaseibacillus_paracasei_ATCC334_GM000296	99.7	1e-148	lpi:LBPG_02524
Lacticaseibacillus_paracasei_ATCC334_GM000297	100	1.6e-179	lca:LSEI_0332	K01750	E4.3.1.12, ocd	ornithine cyclodeaminase	4.3.1.12	Metabolism; Amino acid metabolism; Arginine and proline metabolism [PATH:ko00330] Metabolism; Global and overview maps; Biosynthesis of secondary metabolites [PATH:ko01110] Metabolism; Global and overview maps; Biosynthesis of antibiotics [PATH:ko01130] Metabolism; Global and overview maps; Biosynthesis of amino acids [PATH:ko01230]
Lacticaseibacillus_paracasei_ATCC334_GM000298	100	3.8e-124	lca:LSEI_0333
Lacticaseibacillus_paracasei_ATCC334_GM000299	99.4	7.4e-82	lce:LC2W_2088
Lacticaseibacillus_paracasei_ATCC334_GM000300	100	7.2e-30	lca:LSEI_0335
Lacticaseibacillus_paracasei_ATCC334_GM000301	100	2.2e-293	lca:LSEI_0336	K01421	yhgE	putative membrane protein	--
Lacticaseibacillus_paracasei_ATCC334_GM000302	99.5	2.5e-100	lca:LSEI_0337
Lacticaseibacillus_paracasei_ATCC334_GM000303	100	2.8e-56	lca:LSEI_0338
Lacticaseibacillus_paracasei_ATCC334_GM000304	99.4	2.8e-81	lca:LSEI_0339
Lacticaseibacillus_paracasei_ATCC334_GM000305	100	6.1e-165	lca:LSEI_0340
Lacticaseibacillus_paracasei_ATCC334_GM000306	97.6	7.2e-36	lce:LC2W_2095	K03322	mntH	manganese transport protein	--
Lacticaseibacillus_paracasei_ATCC334_GM000307	100	3.2e-29	lca:LSEI_0342
Lacticaseibacillus_paracasei_ATCC334_GM000308	100	5.4e-54	lce:LC2W_2093
Lacticaseibacillus_paracasei_ATCC334_GM000309	100	1.1e-98	lca:LSEI_0344
Lacticaseibacillus_paracasei_ATCC334_GM000310	100	2e-145	lca:LSEI_0345
Lacticaseibacillus_paracasei_ATCC334_GM000311	98.4	8.9e-23	lde:LDBND_1448
Lacticaseibacillus_paracasei_ATCC334_GM000312	99.5	7.9e-116	lca:LSEI_0347
Lacticaseibacillus_paracasei_ATCC334_GM000313	100	0	lca:LSEI_0349	K07012	cas3	CRISPR-associated endonuclease/helicase Cas3	3.1.-.- 3.6.4.-
Lacticaseibacillus_paracasei_ATCC334_GM000314	100	0	lca:LSEI_0350	K19123	casA, cse1	CRISPR system Cascade subunit CasA	--
Lacticaseibacillus_paracasei_ATCC334_GM000315	99.5	3.5e-108	lca:LSEI_0351	K19046	casB, cse2	CRISPR system Cascade subunit CasB	--
Lacticaseibacillus_paracasei_ATCC334_GM000316	100	5.9e-199	lca:LSEI_0352	K19124	casC, cse4	CRISPR system Cascade subunit CasC	--
Lacticaseibacillus_paracasei_ATCC334_GM000317	100	1.9e-129	lca:LSEI_0353	K19125	casD, cse5	CRISPR system Cascade subunit CasD	--
Lacticaseibacillus_paracasei_ATCC334_GM000318	100	2.8e-119	lca:LSEI_0354	K19126	casE, cse3	CRISPR system Cascade subunit CasE	--
Lacticaseibacillus_paracasei_ATCC334_GM000319	100	4.1e-172	lca:LSEI_0355	K15342	cas1	CRISP-associated protein Cas1	--
Lacticaseibacillus_paracasei_ATCC334_GM000320	100	1.6e-165	lca:LSEI_0356	K09951	cas2	CRISPR-associated protein Cas2	--
Lacticaseibacillus_paracasei_ATCC334_GM000321	100	1.8e-264	lca:LSEI_0357
Lacticaseibacillus_paracasei_ATCC334_GM000322	100	5.1e-29	lca:LSEI_0358
Lacticaseibacillus_paracasei_ATCC334_GM000323	100	7.1e-241	lpq:AF91_05200
Lacticaseibacillus_paracasei_ATCC334_GM000325	100	1.2e-63	lcl:LOCK919_0383	K07006	K07006	uncharacterized protein	--
Lacticaseibacillus_paracasei_ATCC334_GM000326	100	2.2e-124	lca:LSEI_0365
Lacticaseibacillus_paracasei_ATCC334_GM000327	100	1.5e-291	lca:LSEI_0366	K02795	PTS-Man-EIIC, manY	PTS system, mannose-specific IIC component	--	Metabolism; Carbohydrate metabolism; Fructose and mannose metabolism [PATH:ko00051] Metabolism; Carbohydrate metabolism; Amino sugar and nucleotide sugar metabolism [PATH:ko00520] Metabolism; Global and overview maps; Metabolic pathways [PATH:ko01100] Environmental Information Processing; Membrane transport; Phosphotransferase system (PTS) [PATH:ko02060]
Lacticaseibacillus_paracasei_ATCC334_GM000328	100	1.4e-127	lca:LSEI_0367	K00616	E2.2.1.2, talA, talB	transaldolase	2.2.1.2	Metabolism; Carbohydrate metabolism; Pentose phosphate pathway [PATH:ko00030] Metabolism; Global and overview maps; Metabolic pathways [PATH:ko01100] Metabolism; Global and overview maps; Biosynthesis of secondary metabolites [PATH:ko01110] Metabolism; Global and overview maps; Microbial metabolism in diverse environments [PATH:ko01120] Metabolism; Global and overview maps; Biosynthesis of antibi…
Lacticaseibacillus_paracasei_ATCC334_GM000329	99.7	9.1e-189	lca:LSEI_0368
Lacticaseibacillus_paracasei_ATCC334_GM000330	100	5.1e-261	lca:LSEI_0369	K01232	glvA	maltose-6'-phosphate glucosidase	3.2.1.122	Metabolism; Carbohydrate metabolism; Starch and sucrose metabolism [PATH:ko00500]
Lacticaseibacillus_paracasei_ATCC334_GM000331	100	0	lca:LSEI_0370	K02749	PTS-Glv-EIIB, glvB, malP, aglA	PTS system, alpha-glucoside-specific IIB component	2.7.1.208 2.7.1.-	Metabolism; Carbohydrate metabolism; Starch and sucrose metabolism [PATH:ko00500] Environmental Information Processing; Membrane transport; Phosphotransferase system (PTS) [PATH:ko02060]
Lacticaseibacillus_paracasei_ATCC334_GM000332	99.6	1.5e-146	lca:LSEI_0371	K03481	glvR	RpiR family transcriptional regulator, glv operon transcriptional regulator	--
Lacticaseibacillus_paracasei_ATCC334_GM000333	100	6.6e-54	lca:LSEI_0372
Lacticaseibacillus_paracasei_ATCC334_GM000334	72.1	1e-69	lra:LRHK_454
Lacticaseibacillus_paracasei_ATCC334_GM000335	100	7.4e-85	lca:LSEI_0374	K02777	PTS-Glc-EIIA, crr	PTS system, sugar-specific IIA component	2.7.1.-	Metabolism; Carbohydrate metabolism; Glycolysis / Gluconeogenesis [PATH:ko00010] Metabolism; Carbohydrate metabolism; Starch and sucrose metabolism [PATH:ko00500] Metabolism; Carbohydrate metabolism; Amino sugar and nucleotide sugar metabolism [PATH:ko00520] Cellular Processes; Cellular community - prokaryotes; Biofilm formation - Escherichia coli [PATH:ko02026] Environmental Information Processi…
Lacticaseibacillus_paracasei_ATCC334_GM000336	100	3.8e-122	lca:LSEI_0375
Lacticaseibacillus_paracasei_ATCC334_GM000337	100	8.3e-170	lca:LSEI_0376
Lacticaseibacillus_paracasei_ATCC334_GM000338	98.8	2.6e-38	lca:LSEI_0377
Lacticaseibacillus_paracasei_ATCC334_GM000339	100	4.9e-57	lca:LSEI_0378
Lacticaseibacillus_paracasei_ATCC334_GM000340	100	2.8e-216	lcl:LOCK919_0449
Lacticaseibacillus_paracasei_ATCC334_GM000341	100	2.7e-165	lca:LSEI_0380	K07048	PTER, php	phosphotriesterase-related protein	--
Lacticaseibacillus_paracasei_ATCC334_GM000342	100	1.9e-205	lca:LSEI_0381
Lacticaseibacillus_paracasei_ATCC334_GM000343	100	9.8e-224	lca:LSEI_0382
Lacticaseibacillus_paracasei_ATCC334_GM000344	100	1.5e-238	lca:LSEI_0383
Lacticaseibacillus_paracasei_ATCC334_GM000345	100	0	lca:LSEI_0384	K12111	ebgA	evolved beta-galactosidase subunit alpha	3.2.1.23	Metabolism; Carbohydrate metabolism; Galactose metabolism [PATH:ko00052] Metabolism; Glycan biosynthesis and metabolism; Other glycan degradation [PATH:ko00511] Metabolism; Global and overview maps; Metabolic pathways [PATH:ko01100]
Lacticaseibacillus_paracasei_ATCC334_GM000346	100	1.8e-275	lca:LSEI_0385
Lacticaseibacillus_paracasei_ATCC334_GM000347	100	7e-264	lca:LSEI_0386	K03293	TC.AAT	amino acid transporter, AAT family	--
Lacticaseibacillus_paracasei_ATCC334_GM000350	96.8	8.6e-57	lcw:BN194_04620	K16958	tcyL	L-cystine transport system permease protein	--	Environmental Information Processing; Membrane transport; ABC transporters [PATH:ko02010]
Lacticaseibacillus_paracasei_ATCC334_GM000351	100	8.9e-239	lca:LSEI_0390	K03761	kgtP	MFS transporter, MHS family, alpha-ketoglutarate permease	--
Lacticaseibacillus_paracasei_ATCC334_GM000352	100	1.2e-82	lpap:LBPC_0361
Lacticaseibacillus_paracasei_ATCC334_GM000353	100	7.8e-17	lca:LSEI_0392
Lacticaseibacillus_paracasei_ATCC334_GM000354	100	8.4e-144	lca:LSEI_0393
Lacticaseibacillus_paracasei_ATCC334_GM000355	100	1.4e-86	lpap:LBPC_0364
Lacticaseibacillus_paracasei_ATCC334_GM000356	100	7.3e-186	lca:LSEI_0395	K02004	ABC.CD.P	putative ABC transport system permease protein	--
Lacticaseibacillus_paracasei_ATCC334_GM000357	100	7.7e-120	lca:LSEI_0396	K02003	ABC.CD.A	putative ABC transport system ATP-binding protein	--
Lacticaseibacillus_paracasei_ATCC334_GM000358	99.8	4.7e-262	lcw:BN194_04740	K05910	npr	NADH peroxidase	1.11.1.1
Lacticaseibacillus_paracasei_ATCC334_GM000359	100	4.5e-151	lca:LSEI_0398
Lacticaseibacillus_paracasei_ATCC334_GM000360	100	4.1e-45	lpi:LBPG_02586	K19157	yafQ	mRNA interferase YafQ	3.1.-.-
Lacticaseibacillus_paracasei_ATCC334_GM000361	100	2.6e-185	lpi:LBPG_02588
Lacticaseibacillus_paracasei_ATCC334_GM000362	99.4	7e-86	lce:LC2W_0473
Lacticaseibacillus_paracasei_ATCC334_GM000363	100	7.4e-138	lcz:LCAZH_0436	K02795	PTS-Man-EIIC, manY	PTS system, mannose-specific IIC component	--	Metabolism; Carbohydrate metabolism; Fructose and mannose metabolism [PATH:ko00051] Metabolism; Carbohydrate metabolism; Amino sugar and nucleotide sugar metabolism [PATH:ko00520] Metabolism; Global and overview maps; Metabolic pathways [PATH:ko01100] Environmental Information Processing; Membrane transport; Phosphotransferase system (PTS) [PATH:ko02060]
Lacticaseibacillus_paracasei_ATCC334_GM000364	100	2.3e-156	lcw:BN194_04800	K02796	PTS-Man-EIID, manZ	PTS system, mannose-specific IID component	--	Metabolism; Carbohydrate metabolism; Fructose and mannose metabolism [PATH:ko00051] Metabolism; Carbohydrate metabolism; Amino sugar and nucleotide sugar metabolism [PATH:ko00520] Metabolism; Global and overview maps; Metabolic pathways [PATH:ko01100] Environmental Information Processing; Membrane transport; Phosphotransferase system (PTS) [PATH:ko02060]
Lacticaseibacillus_paracasei_ATCC334_GM000365	99.9	0	lca:LSEI_0404
Lacticaseibacillus_paracasei_ATCC334_GM000366	100	3.7e-69	lca:LSEI_0405	K02793	PTS-Man-EIIA, manX	PTS system, mannose-specific IIA component	2.7.1.191	Metabolism; Carbohydrate metabolism; Fructose and mannose metabolism [PATH:ko00051] Metabolism; Carbohydrate metabolism; Amino sugar and nucleotide sugar metabolism [PATH:ko00520] Metabolism; Global and overview maps; Metabolic pathways [PATH:ko01100] Environmental Information Processing; Membrane transport; Phosphotransferase system (PTS) [PATH:ko02060]
Lacticaseibacillus_paracasei_ATCC334_GM000367	100	0	lca:LSEI_0406	K01182	IMA, malL	oligo-1,6-glucosidase	3.2.1.10	Metabolism; Carbohydrate metabolism; Galactose metabolism [PATH:ko00052] Metabolism; Carbohydrate metabolism; Starch and sucrose metabolism [PATH:ko00500] Metabolism; Global and overview maps; Metabolic pathways [PATH:ko01100]
Lacticaseibacillus_paracasei_ATCC334_GM000368	99.8	0	lca:LSEI_0407	K06147	ABCB-BAC	ATP-binding cassette, subfamily B, bacterial	--
Lacticaseibacillus_paracasei_ATCC334_GM000369	99.8	1.4e-289	lca:LSEI_0408
Lacticaseibacillus_paracasei_ATCC334_GM000370	100	0	lca:LSEI_0410	K01421	yhgE	putative membrane protein	--
Lacticaseibacillus_paracasei_ATCC334_GM000371	100	1.3e-156	lca:LSEI_0411	K02073	metQ	D-methionine transport system substrate-binding protein	--	Environmental Information Processing; Membrane transport; ABC transporters [PATH:ko02010]
Lacticaseibacillus_paracasei_ATCC334_GM000372	100	5.9e-190	lca:LSEI_0412	K01442	E3.5.1.24	choloylglycine hydrolase	3.5.1.24	Metabolism; Lipid metabolism; Primary bile acid biosynthesis [PATH:ko00120] Metabolism; Lipid metabolism; Secondary bile acid biosynthesis [PATH:ko00121] Metabolism; Global and overview maps; Metabolic pathways [PATH:ko01100]
Lacticaseibacillus_paracasei_ATCC334_GM000373	100	1.4e-291	lca:LSEI_0413
Lacticaseibacillus_paracasei_ATCC334_GM000374	96.6	8.7e-07	lca:LSEI_0414
Lacticaseibacillus_paracasei_ATCC334_GM000375	100	2e-182	lpap:LBPC_0382
Lacticaseibacillus_paracasei_ATCC334_GM000376	100	0	lca:LSEI_0416	K10254	ohyA, sph	oleate hydratase	4.2.1.53
Lacticaseibacillus_paracasei_ATCC334_GM000377	100	1.2e-15	lpap:LBPC_0384
Lacticaseibacillus_paracasei_ATCC334_GM000378	100	2.3e-101	lca:LSEI_0418
Lacticaseibacillus_paracasei_ATCC334_GM000379	100	3.1e-59	lcs:LCBD_0489	K05881	dhaM	phosphoenolpyruvate---glycerone phosphotransferase subunit DhaM	2.7.1.121	Metabolism; Lipid metabolism; Glycerolipid metabolism [PATH:ko00561] Metabolism; Global and overview maps; Metabolic pathways [PATH:ko01100]
Lacticaseibacillus_paracasei_ATCC334_GM000380	100	7.2e-103	lca:LSEI_0420	K05879	dhaL	phosphoenolpyruvate---glycerone phosphotransferase subunit DhaL	2.7.1.121	Metabolism; Lipid metabolism; Glycerolipid metabolism [PATH:ko00561] Metabolism; Global and overview maps; Metabolic pathways [PATH:ko01100]
Lacticaseibacillus_paracasei_ATCC334_GM000381	100	3e-189	lpap:LBPC_0388	K05878	dhaK	phosphoenolpyruvate---glycerone phosphotransferase subunit DhaK	2.7.1.121	Metabolism; Lipid metabolism; Glycerolipid metabolism [PATH:ko00561] Metabolism; Global and overview maps; Metabolic pathways [PATH:ko01100]
Lacticaseibacillus_paracasei_ATCC334_GM000382	100	9.4e-17	lcz:LCAZH_0455
Lacticaseibacillus_paracasei_ATCC334_GM000383	100	3.8e-77	lca:LSEI_0423
Lacticaseibacillus_paracasei_ATCC334_GM000385	99.7	3.9e-161	lca:LSEI_0426
Lacticaseibacillus_paracasei_ATCC334_GM000386	100	2.8e-265	lca:LSEI_0427
Lacticaseibacillus_paracasei_ATCC334_GM000387	100	1.5e-48	lca:LSEI_0428
Lacticaseibacillus_paracasei_ATCC334_GM000388	100	2.6e-197	lca:LSEI_0429
Lacticaseibacillus_paracasei_ATCC334_GM000389	99.1	5.9e-114	lce:LC2W_0499
Lacticaseibacillus_paracasei_ATCC334_GM000390	100	1.3e-107	lca:LSEI_0431	K01246	tag	DNA-3-methyladenine glycosylase I	3.2.2.20	Genetic Information Processing; Replication and repair; Base excision repair [PATH:ko03410]
Lacticaseibacillus_paracasei_ATCC334_GM000391	100	2.8e-167	lcz:LCAZH_0464	K01624	FBA, fbaA	fructose-bisphosphate aldolase, class II	4.1.2.13	Metabolism; Carbohydrate metabolism; Glycolysis / Gluconeogenesis [PATH:ko00010] Metabolism; Carbohydrate metabolism; Pentose phosphate pathway [PATH:ko00030] Metabolism; Carbohydrate metabolism; Fructose and mannose metabolism [PATH:ko00051] Metabolism; Energy metabolism; Methane metabolism [PATH:ko00680] Metabolism; Energy metabolism; Carbon fixation in photosynthetic organisms [PATH:ko00710] M…
Lacticaseibacillus_paracasei_ATCC334_GM000392	100	0	lcx:LCA12A_2445	K00158	E1.2.3.3, poxL	pyruvate oxidase	1.2.3.3	Metabolism; Carbohydrate metabolism; Pyruvate metabolism [PATH:ko00620] Metabolism; Global and overview maps; Metabolic pathways [PATH:ko01100]
Lacticaseibacillus_paracasei_ATCC334_GM000393	73.7	1.3e-35	lrh:LGG_00527
Lacticaseibacillus_paracasei_ATCC334_GM000394	99.5	2.3e-118	lca:LSEI_0435
Lacticaseibacillus_paracasei_ATCC334_GM000395	100	1.6e-196	lca:LSEI_0436
Lacticaseibacillus_paracasei_ATCC334_GM000396	100	3.3e-134	lca:LSEI_0437
Lacticaseibacillus_paracasei_ATCC334_GM000397	99.6	1e-141	lca:LSEI_0438	K07010	K07010	putative glutamine amidotransferase	--
Lacticaseibacillus_paracasei_ATCC334_GM000398	100	2.9e-256	lca:LSEI_0439	K01915	glnA, GLUL	glutamine synthetase	6.3.1.2	Metabolism; Amino acid metabolism; Arginine biosynthesis [PATH:ko00220] Metabolism; Amino acid metabolism; Alanine, aspartate and glutamate metabolism [PATH:ko00250] Metabolism; Carbohydrate metabolism; Glyoxylate and dicarboxylate metabolism [PATH:ko00630] Metabolism; Energy metabolism; Nitrogen metabolism [PATH:ko00910] Metabolism; Global and overview maps; Metabolic pathways [PATH:ko01100] Met…
Lacticaseibacillus_paracasei_ATCC334_GM000399	99.7	6.7e-222	lca:LSEI_0440	K07045	K07045	uncharacterized protein	--
Lacticaseibacillus_paracasei_ATCC334_GM000400	100	5.2e-242	lca:LSEI_0441
Lacticaseibacillus_paracasei_ATCC334_GM000401	100	6.1e-75	lce:LC2W_0509
Lacticaseibacillus_paracasei_ATCC334_GM000402	98.8	2.9e-181	lcw:BN194_05160
Lacticaseibacillus_paracasei_ATCC334_GM000403	98.6	5.7e-210	lcw:BN194_05170
Lacticaseibacillus_paracasei_ATCC334_GM000404	100	3.5e-57	lpi:LBPG_02630
Lacticaseibacillus_paracasei_ATCC334_GM000405	100	1.9e-241	lca:LSEI_0446
Lacticaseibacillus_paracasei_ATCC334_GM000406	100	6.8e-96	lpap:LBPC_0412
Lacticaseibacillus_paracasei_ATCC334_GM000407	100	2.1e-289	lca:LSEI_0448	K01223	E3.2.1.86B, bglA	6-phospho-beta-glucosidase	3.2.1.86	Metabolism; Carbohydrate metabolism; Glycolysis / Gluconeogenesis [PATH:ko00010] Metabolism; Carbohydrate metabolism; Starch and sucrose metabolism [PATH:ko00500]
Lacticaseibacillus_paracasei_ATCC334_GM000408	100	4.9e-57	lpq:AF91_01495	K02759	PTS-Cel-EIIA, celC, chbA	PTS system, cellobiose-specific IIA component	2.7.1.196 2.7.1.205	Metabolism; Carbohydrate metabolism; Starch and sucrose metabolism [PATH:ko00500] Environmental Information Processing; Membrane transport; Phosphotransferase system (PTS) [PATH:ko02060]
Lacticaseibacillus_paracasei_ATCC334_GM000409	100	2.4e-211	lca:LSEI_0450	K02761	PTS-Cel-EIIC, celB, chbC	PTS system, cellobiose-specific IIC component	--	Metabolism; Carbohydrate metabolism; Starch and sucrose metabolism [PATH:ko00500] Environmental Information Processing; Membrane transport; Phosphotransferase system (PTS) [PATH:ko02060]
Lacticaseibacillus_paracasei_ATCC334_GM000410	100	4.8e-41	lcw:BN194_05230	K02760	PTS-Cel-EIIB, celA, chbB	PTS system, cellobiose-specific IIB component	2.7.1.196 2.7.1.205	Metabolism; Carbohydrate metabolism; Starch and sucrose metabolism [PATH:ko00500] Environmental Information Processing; Membrane transport; Phosphotransferase system (PTS) [PATH:ko02060]
Lacticaseibacillus_paracasei_ATCC334_GM000411	100	0	lca:LSEI_0453	K03491	licR	lichenan operon transcriptional antiterminator	--
Lacticaseibacillus_paracasei_ATCC334_GM000412	100	6.6e-104	lcl:LOCK919_0545
Lacticaseibacillus_paracasei_ATCC334_GM000413	100	0	lca:LSEI_0455
Lacticaseibacillus_paracasei_ATCC334_GM000414	100	1.5e-126	lcx:LCA12A_2819
Lacticaseibacillus_paracasei_ATCC334_GM000415	100	1.7e-184	lce:LC2W_0522
Lacticaseibacillus_paracasei_ATCC334_GM000416	100	6.2e-201	lca:LSEI_0457	K07284	srtA	sortase A	3.4.22.70
Lacticaseibacillus_paracasei_ATCC334_GM000417	100	8.8e-130	lca:LSEI_0458	K01990	ABC-2.A	ABC-2 type transport system ATP-binding protein	--
Lacticaseibacillus_paracasei_ATCC334_GM000418	100	2.4e-305	lca:LSEI_0459
Lacticaseibacillus_paracasei_ATCC334_GM000419	100	3.1e-115	lca:LSEI_0460
Lacticaseibacillus_paracasei_ATCC334_GM000420	100	9.3e-208	lca:LSEI_0461	K20487	nisK, spaK	two-component system, OmpR family, lantibiotic biosynthesis sensor histidine kinase NisK/SpaK	2.7.13.3	Environmental Information Processing; Signal transduction; Two-component system [PATH:ko02020] Cellular Processes; Cellular community - prokaryotes; Quorum sensing [PATH:ko02024]
Lacticaseibacillus_paracasei_ATCC334_GM000421	100	6.3e-159	lca:LSEI_0462	K01990	ABC-2.A	ABC-2 type transport system ATP-binding protein	--
Lacticaseibacillus_paracasei_ATCC334_GM000422	100	8.4e-212	lca:LSEI_0463
Lacticaseibacillus_paracasei_ATCC334_GM000423	100	1.4e-89	lca:LSEI_0464
Lacticaseibacillus_paracasei_ATCC334_GM000424	99.9	0	lca:LSEI_0465
Lacticaseibacillus_paracasei_ATCC334_GM000427	100	0	lca:LSEI_0468
Lacticaseibacillus_paracasei_ATCC334_GM000428	100	4.6e-85	lca:LSEI_0469
Lacticaseibacillus_paracasei_ATCC334_GM000429	100	0	lca:LSEI_0470	K01256	pepN	aminopeptidase N	3.4.11.2	Metabolism; Metabolism of other amino acids; Glutathione metabolism [PATH:ko00480] Metabolism; Global and overview maps; Metabolic pathways [PATH:ko01100]
Lacticaseibacillus_paracasei_ATCC334_GM000430	100	1.1e-274	lca:LSEI_0471
Lacticaseibacillus_paracasei_ATCC334_GM000431	100	2.1e-90	lcl:LOCK919_0561	K08996	yagU	putative membrane protein	--
Lacticaseibacillus_paracasei_ATCC334_GM000432	100	1.2e-165	lca:LSEI_0473
Lacticaseibacillus_paracasei_ATCC334_GM000433	100	1.2e-167	lca:LSEI_0474
Lacticaseibacillus_paracasei_ATCC334_GM000434	100	8.9e-155	lca:LSEI_0475
Lacticaseibacillus_paracasei_ATCC334_GM000435	100	1.8e-164	lca:LSEI_0476	K00014	aroE	shikimate dehydrogenase	1.1.1.25	Metabolism; Amino acid metabolism; Phenylalanine, tyrosine and tryptophan biosynthesis [PATH:ko00400] Metabolism; Global and overview maps; Metabolic pathways [PATH:ko01100] Metabolism; Global and overview maps; Biosynthesis of secondary metabolites [PATH:ko01110] Metabolism; Global and overview maps; Biosynthesis of antibiotics [PATH:ko01130] Metabolism; Global and overview maps; Biosynthesis of…
Lacticaseibacillus_paracasei_ATCC334_GM000436	100	7.8e-216	lca:LSEI_0477
Lacticaseibacillus_paracasei_ATCC334_GM000437	100	5.8e-168	lca:LSEI_0478	K00014	aroE	shikimate dehydrogenase	1.1.1.25	Metabolism; Amino acid metabolism; Phenylalanine, tyrosine and tryptophan biosynthesis [PATH:ko00400] Metabolism; Global and overview maps; Metabolic pathways [PATH:ko01100] Metabolism; Global and overview maps; Biosynthesis of secondary metabolites [PATH:ko01110] Metabolism; Global and overview maps; Biosynthesis of antibiotics [PATH:ko01130] Metabolism; Global and overview maps; Biosynthesis of…
Lacticaseibacillus_paracasei_ATCC334_GM000438	99.6	3.1e-160	lca:LSEI_0479	K00651	metA	homoserine O-succinyltransferase/O-acetyltransferase	2.3.1.46 2.3.1.31	Metabolism; Amino acid metabolism; Cysteine and methionine metabolism [PATH:ko00270] Metabolism; Energy metabolism; Sulfur metabolism [PATH:ko00920] Metabolism; Global and overview maps; Metabolic pathways [PATH:ko01100] Metabolism; Global and overview maps; Biosynthesis of secondary metabolites [PATH:ko01110] Metabolism; Global and overview maps; Biosynthesis of antibiotics [PATH:ko01130] Metabo…
Lacticaseibacillus_paracasei_ATCC334_GM000439	100	6.3e-173	lcl:LOCK919_0570	K01738	cysK	cysteine synthase	2.5.1.47	Metabolism; Amino acid metabolism; Cysteine and methionine metabolism [PATH:ko00270] Metabolism; Energy metabolism; Sulfur metabolism [PATH:ko00920] Metabolism; Global and overview maps; Metabolic pathways [PATH:ko01100] Metabolism; Global and overview maps; Biosynthesis of secondary metabolites [PATH:ko01110] Metabolism; Global and overview maps; Microbial metabolism in diverse environments [PAT…
Lacticaseibacillus_paracasei_ATCC334_GM000440	100	2.6e-38	lca:LSEI_0481
Lacticaseibacillus_paracasei_ATCC334_GM000441	100	8e-44	lca:LSEI_1926
Lacticaseibacillus_paracasei_ATCC334_GM000442	100	2.6e-154	lca:LSEI_0483
Lacticaseibacillus_paracasei_ATCC334_GM000443	100	2.2e-223	lca:LSEI_0486
Lacticaseibacillus_paracasei_ATCC334_GM000444	100	5.7e-114	lca:LSEI_0488
Lacticaseibacillus_paracasei_ATCC334_GM000445	100	1.2e-78	lcb:LCABL_05540
Lacticaseibacillus_paracasei_ATCC334_GM000446	100	2e-38	lca:LSEI_0493
Lacticaseibacillus_paracasei_ATCC334_GM000447	100	1.2e-38	lcb:LCABL_05560
Lacticaseibacillus_paracasei_ATCC334_GM000448	100	6.4e-27	lcl:LOCK919_0581
Lacticaseibacillus_paracasei_ATCC334_GM000449	100	1.2e-142	lca:LSEI_0497
Lacticaseibacillus_paracasei_ATCC334_GM000450	100	2e-24	lcs:LCBD_0560
Lacticaseibacillus_paracasei_ATCC334_GM000451	100	4.3e-44	lcw:BN194_05660
Lacticaseibacillus_paracasei_ATCC334_GM000452	100	1.5e-63	lcl:LOCK919_0586
Lacticaseibacillus_paracasei_ATCC334_GM000453	100	6e-24	lca:LSEI_0502
Lacticaseibacillus_paracasei_ATCC334_GM000454	100	3.3e-61	lcl:LOCK919_0588
Lacticaseibacillus_paracasei_ATCC334_GM000456	100	7.8e-140	lca:LSEI_0507
Lacticaseibacillus_paracasei_ATCC334_GM000457	100	8.8e-155	lca:LSEI_0508	K02315	dnaC	DNA replication protein DnaC	--
Lacticaseibacillus_paracasei_ATCC334_GM000458	100	8.4e-95	lca:LSEI_0509
Lacticaseibacillus_paracasei_ATCC334_GM000459	100	1.4e-71	lca:LSEI_0510
Lacticaseibacillus_paracasei_ATCC334_GM000460	100	3.8e-133	lce:LC2W_0572
Lacticaseibacillus_paracasei_ATCC334_GM000461	100	2.5e-188	lca:LSEI_2691
Lacticaseibacillus_paracasei_ATCC334_GM000463	100	9.2e-160	lca:LSEI_0518
Lacticaseibacillus_paracasei_ATCC334_GM000464	100	1.4e-34	lcb:LCABL_05770
Lacticaseibacillus_paracasei_ATCC334_GM000465	100	2.2e-25	lcw:BN194_05850
Lacticaseibacillus_paracasei_ATCC334_GM000466	99.4	1.2e-91	lca:LSEI_2689
Lacticaseibacillus_paracasei_ATCC334_GM000467	100	2.9e-86	lpap:LBPC_0148
Lacticaseibacillus_paracasei_ATCC334_GM000468	100	8e-44	lca:LSEI_1926
Lacticaseibacillus_paracasei_ATCC334_GM000469	100	1.1e-155	lca:LSEI_0524
Lacticaseibacillus_paracasei_ATCC334_GM000470	100	4.3e-45	lca:LSEI_0526
Lacticaseibacillus_paracasei_ATCC334_GM000471	100	1.7e-43	lcl:LOCK919_0608
Lacticaseibacillus_paracasei_ATCC334_GM000472	100	5.8e-24	lca:LSEI_0528
Lacticaseibacillus_paracasei_ATCC334_GM000473	100	1.4e-30	lcl:LOCK919_0610
Lacticaseibacillus_paracasei_ATCC334_GM000474	100	4.8e-207	lca:LSEI_0530
Lacticaseibacillus_paracasei_ATCC334_GM000475	100	1.1e-243	lca:LSEI_0531
Lacticaseibacillus_paracasei_ATCC334_GM000476	100	7.3e-73	lca:LSEI_0532
Lacticaseibacillus_paracasei_ATCC334_GM000477	100	8.5e-96	lca:LSEI_0533
Lacticaseibacillus_paracasei_ATCC334_GM000478	100	0	lca:LSEI_0534	K03205	virD4, lvhD4	type IV secretion system protein VirD4	--	Environmental Information Processing; Membrane transport; Bacterial secretion system [PATH:ko03070]
Lacticaseibacillus_paracasei_ATCC334_GM000479	99.9	0	lca:LSEI_0535
Lacticaseibacillus_paracasei_ATCC334_GM000480	100	3.7e-51	lca:LSEI_0536
Lacticaseibacillus_paracasei_ATCC334_GM000481	99.5	5.5e-106	lca:LSEI_0537
Lacticaseibacillus_paracasei_ATCC334_GM000482	99.8	0	lca:LSEI_0538
Lacticaseibacillus_paracasei_ATCC334_GM000483	99.7	6.7e-189	lca:LSEI_0539
Lacticaseibacillus_paracasei_ATCC334_GM000484	100	4.1e-107	lca:LSEI_0540
Lacticaseibacillus_paracasei_ATCC334_GM000485	100	4.8e-69	lca:LSEI_0541
Lacticaseibacillus_paracasei_ATCC334_GM000486	100	3.4e-143	lca:LSEI_0542
Lacticaseibacillus_paracasei_ATCC334_GM000487	100	6e-38	lca:LSEI_0544
Lacticaseibacillus_paracasei_ATCC334_GM000488	100	4e-71	lca:LSEI_0545
Lacticaseibacillus_paracasei_ATCC334_GM000489	100	2.5e-230	lca:LSEI_0546
Lacticaseibacillus_paracasei_ATCC334_GM000490	100	1.8e-39	lca:LSEI_0547
Lacticaseibacillus_paracasei_ATCC334_GM000491	100	0	lca:LSEI_0548
Lacticaseibacillus_paracasei_ATCC334_GM000492	100	2.2e-19	lca:LSEI_0551
Lacticaseibacillus_paracasei_ATCC334_GM000493	98.8	2e-41	lca:LSEI_0552
Lacticaseibacillus_paracasei_ATCC334_GM000494	100	6.5e-164	lca:LSEI_0553
Lacticaseibacillus_paracasei_ATCC334_GM000496	98.1	3.5e-79	lce:LC2W_0620	K07284	srtA	sortase A	3.4.22.70
Lacticaseibacillus_paracasei_ATCC334_GM000497	100	1.4e-33	lca:LSEI_0556
Lacticaseibacillus_paracasei_ATCC334_GM000498	99.9	0	lca:LSEI_0558
Lacticaseibacillus_paracasei_ATCC334_GM000499	100	4.5e-73	lca:LSEI_0559
Lacticaseibacillus_paracasei_ATCC334_GM000500	100	1e-89	lpap:LBPC_0334
Lacticaseibacillus_paracasei_ATCC334_GM000501	100	9.5e-138	lpap:LBPC_0335	K02795	PTS-Man-EIIC, manY	PTS system, mannose-specific IIC component	--	Metabolism; Carbohydrate metabolism; Fructose and mannose metabolism [PATH:ko00051] Metabolism; Carbohydrate metabolism; Amino sugar and nucleotide sugar metabolism [PATH:ko00520] Metabolism; Global and overview maps; Metabolic pathways [PATH:ko01100] Environmental Information Processing; Membrane transport; Phosphotransferase system (PTS) [PATH:ko02060]
Lacticaseibacillus_paracasei_ATCC334_GM000502	100	2.4e-155	lpi:LBPG_02557
Lacticaseibacillus_paracasei_ATCC334_GM000503	100	6.4e-56	lca:LSEI_0563
Lacticaseibacillus_paracasei_ATCC334_GM000504	99.9	0	lca:LSEI_0564
Lacticaseibacillus_paracasei_ATCC334_GM000505	98.3	6.2e-57	lpi:LBPG_03063
Lacticaseibacillus_paracasei_ATCC334_GM000506	98.6	7.6e-160	lpap:LBPC_0675
Lacticaseibacillus_paracasei_ATCC334_GM000507	97.1	2.4e-28	lpap:LBPC_0488
Lacticaseibacillus_paracasei_ATCC334_GM000508	100	1.7e-119	lca:LSEI_0568
Lacticaseibacillus_paracasei_ATCC334_GM000509	100	5.5e-100	lca:LSEI_0570
Lacticaseibacillus_paracasei_ATCC334_GM000511	100	2.9e-124	lca:LSEI_0319
Lacticaseibacillus_paracasei_ATCC334_GM000512	100	9.1e-36	lca:LSEI_0574
Lacticaseibacillus_paracasei_ATCC334_GM000513	99.4	2e-82	lca:LSEI_0575
Lacticaseibacillus_paracasei_ATCC334_GM000514	98.8	2e-34	lpap:LBPC_0507
Lacticaseibacillus_paracasei_ATCC334_GM000515	100	9e-103	lpi:LBPG_02282
Lacticaseibacillus_paracasei_ATCC334_GM000516	99.8	1.9e-247	lca:LSEI_0578
Lacticaseibacillus_paracasei_ATCC334_GM000517	100	7.3e-103	lca:LSEI_0579
Lacticaseibacillus_paracasei_ATCC334_GM000518	100	1.8e-264	lca:LSEI_0609
Lacticaseibacillus_paracasei_ATCC334_GM000519	100	3.4e-134	lca:LSEI_0582
Lacticaseibacillus_paracasei_ATCC334_GM000520	100	1.8e-264	lca:LSEI_0609
Lacticaseibacillus_paracasei_ATCC334_GM000521	100	0	lca:LSEI_0585	K01156	res	type III restriction enzyme	3.1.21.5
Lacticaseibacillus_paracasei_ATCC334_GM000522	100	1e-239	lca:LSEI_0586	K07316	mod	adenine-specific DNA-methyltransferase	2.1.1.72
Lacticaseibacillus_paracasei_ATCC334_GM000524	100	2e-41	lca:LSEI_0588
Lacticaseibacillus_paracasei_ATCC334_GM000525	100	6e-191	lca:LSEI_0589
Lacticaseibacillus_paracasei_ATCC334_GM000526	100	4e-115	lca:LSEI_0590
Lacticaseibacillus_paracasei_ATCC334_GM000527	100	3.5e-69	lca:LSEI_2344
Lacticaseibacillus_paracasei_ATCC334_GM000528	100	3.8e-144	lce:LC2W_0651	K03734	apbE	FAD:protein FMN transferase	2.7.1.180
Lacticaseibacillus_paracasei_ATCC334_GM000529	100	4.6e-108	lcw:BN194_06530
Lacticaseibacillus_paracasei_ATCC334_GM000530	100	5e-242	lca:LSEI_0594
Lacticaseibacillus_paracasei_ATCC334_GM000531	100	1.4e-30	lpap:LBPC_2099
Lacticaseibacillus_paracasei_ATCC334_GM000532	100	8e-44	lca:LSEI_1926
Lacticaseibacillus_paracasei_ATCC334_GM000533	100	1.8e-155	lca:LSEI_1927
Lacticaseibacillus_paracasei_ATCC334_GM000534	100	1.8e-264	lca:LSEI_0609
Lacticaseibacillus_paracasei_ATCC334_GM000535	99.7	4.1e-183	lca:LSEI_0599
Lacticaseibacillus_paracasei_ATCC334_GM000536	100	8.9e-214	lca:LSEI_0600	K01760	metC	cysteine-S-conjugate beta-lyase	4.4.1.13	Metabolism; Amino acid metabolism; Cysteine and methionine metabolism [PATH:ko00270] Metabolism; Metabolism of other amino acids; Selenocompound metabolism [PATH:ko00450] Metabolism; Global and overview maps; Metabolic pathways [PATH:ko01100] Metabolism; Global and overview maps; Biosynthesis of secondary metabolites [PATH:ko01110] Metabolism; Global and overview maps; Biosynthesis of amino acids…
Lacticaseibacillus_paracasei_ATCC334_GM000537	100	1.8e-144	lca:LSEI_0601	K02424	fliY	cystine transport system substrate-binding protein	--	Environmental Information Processing; Membrane transport; ABC transporters [PATH:ko02010]
Lacticaseibacillus_paracasei_ATCC334_GM000538	100	2.2e-122	lca:LSEI_0602	K10009	ABC.CYST.P	cystine transport system permease protein	--	Environmental Information Processing; Membrane transport; ABC transporters [PATH:ko02010]
Lacticaseibacillus_paracasei_ATCC334_GM000539	100	1e-143	lca:LSEI_0603
Lacticaseibacillus_paracasei_ATCC334_GM000540	100	4.8e-254	lca:LSEI_0604	K03311	TC.LIVCS	branched-chain amino acid:cation transporter, LIVCS family	--
Lacticaseibacillus_paracasei_ATCC334_GM000541	100	3.5e-117	lcs:LCBD_0670
Lacticaseibacillus_paracasei_ATCC334_GM000542	100	1.1e-175	lca:LSEI_0606
Lacticaseibacillus_paracasei_ATCC334_GM000543	100	1.2e-44	lca:LSEI_0607
Lacticaseibacillus_paracasei_ATCC334_GM000545	100	1.8e-264	lca:LSEI_0609
Lacticaseibacillus_paracasei_ATCC334_GM000546	99.5	1.1e-216	lcl:LOCK919_0697
Lacticaseibacillus_paracasei_ATCC334_GM000547	100	8.3e-11	lcx:LCA12A_2493
Lacticaseibacillus_paracasei_ATCC334_GM000548	100	2.2e-124	lca:LSEI_0365
Lacticaseibacillus_paracasei_ATCC334_GM000549	100	8.8e-113	lca:LSEI_0614
Lacticaseibacillus_paracasei_ATCC334_GM000550	100	9.4e-55	lca:LSEI_0615
Lacticaseibacillus_paracasei_ATCC334_GM000551	100	1.6e-125	lca:LSEI_0616
Lacticaseibacillus_paracasei_ATCC334_GM000552	100	0	lca:LSEI_0617
Lacticaseibacillus_paracasei_ATCC334_GM000553	99.4	5.5e-183	lcw:BN194_06830
Lacticaseibacillus_paracasei_ATCC334_GM000554	100	0	lca:LSEI_0619
Lacticaseibacillus_paracasei_ATCC334_GM000555	100	1.8e-144	lcs:LCBD_0681	K01990	ABC-2.A	ABC-2 type transport system ATP-binding protein	--
Lacticaseibacillus_paracasei_ATCC334_GM000556	100	1.1e-87	lce:LC2W_0685
Lacticaseibacillus_paracasei_ATCC334_GM000557	100	1.1e-138	lpi:LBPG_02682	K00868	pdxK, pdxY	pyridoxine kinase	2.7.1.35	Metabolism; Metabolism of cofactors and vitamins; Vitamin B6 metabolism [PATH:ko00750] Metabolism; Global and overview maps; Metabolic pathways [PATH:ko01100]
Lacticaseibacillus_paracasei_ATCC334_GM000558	100	8.4e-164	lpq:AF91_02130	K00297	metF, MTHFR	methylenetetrahydrofolate reductase (NADPH)	1.5.1.20	Metabolism; Metabolism of cofactors and vitamins; One carbon pool by folate [PATH:ko00670] Metabolism; Energy metabolism; Carbon fixation pathways in prokaryotes [PATH:ko00720] Metabolism; Global and overview maps; Metabolic pathways [PATH:ko01100] Metabolism; Global and overview maps; Microbial metabolism in diverse environments [PATH:ko01120] Metabolism; Global and overview maps; Carbon metabol…
Lacticaseibacillus_paracasei_ATCC334_GM000559	100	0	lca:LSEI_0625	K00549	metE	5-methyltetrahydropteroyltriglutamate--homocysteine methyltransferase	2.1.1.14	Metabolism; Amino acid metabolism; Cysteine and methionine metabolism [PATH:ko00270] Metabolism; Metabolism of other amino acids; Selenocompound metabolism [PATH:ko00450] Metabolism; Global and overview maps; Metabolic pathways [PATH:ko01100] Metabolism; Global and overview maps; Biosynthesis of secondary metabolites [PATH:ko01110] Metabolism; Global and overview maps; Biosynthesis of amino acids…
Lacticaseibacillus_paracasei_ATCC334_GM000560	100	0	lce:LC2W_0690	K18891	patA, rscA, lmrC, satA	ATP-binding cassette, subfamily B, multidrug efflux pump	--	Environmental Information Processing; Membrane transport; ABC transporters [PATH:ko02010]
Lacticaseibacillus_paracasei_ATCC334_GM000561	100	0	lca:LSEI_0627	K18892	patB, rscB, lmrC, satB	ATP-binding cassette, subfamily B, multidrug efflux pump	--	Environmental Information Processing; Membrane transport; ABC transporters [PATH:ko02010]
Lacticaseibacillus_paracasei_ATCC334_GM000562	100	2.7e-224	lca:LSEI_0628	K08177	oxlT	MFS transporter, OFA family, oxalate/formate antiporter	--
Lacticaseibacillus_paracasei_ATCC334_GM000563	100	2.5e-129	lca:LSEI_0629	K03486	treR2, treR	GntR family transcriptional regulator, trehalose operon transcriptional repressor	--
Lacticaseibacillus_paracasei_ATCC334_GM000564	100	0	lca:LSEI_0630	K01226	treC	trehalose-6-phosphate hydrolase	3.2.1.93	Metabolism; Carbohydrate metabolism; Starch and sucrose metabolism [PATH:ko00500]
Lacticaseibacillus_paracasei_ATCC334_GM000565	100	0	lca:LSEI_0631	K02755	PTS-Bgl-EIIA, bglF, bglP	PTS system, beta-glucoside-specific IIA component	2.7.1.-	Environmental Information Processing; Membrane transport; Phosphotransferase system (PTS) [PATH:ko02060]
Lacticaseibacillus_paracasei_ATCC334_GM000566	100	1.4e-223	lca:LSEI_0632	K07862	sstT	serine/threonine transporter	--
Lacticaseibacillus_paracasei_ATCC334_GM000567	100	2.1e-268	lca:LSEI_0633	K03294	TC.APA	basic amino acid/polyamine antiporter, APA family	--
Lacticaseibacillus_paracasei_ATCC334_GM000568	100	6.3e-173	lca:LSEI_0634	K00016	LDH, ldh	L-lactate dehydrogenase	1.1.1.27	Metabolism; Carbohydrate metabolism; Glycolysis / Gluconeogenesis [PATH:ko00010] Metabolism; Amino acid metabolism; Cysteine and methionine metabolism [PATH:ko00270] Metabolism; Carbohydrate metabolism; Pyruvate metabolism [PATH:ko00620] Metabolism; Carbohydrate metabolism; Propanoate metabolism [PATH:ko00640] Metabolism; Global and overview maps; Metabolic pathways [PATH:ko01100] Metabolism; Glo…
Lacticaseibacillus_paracasei_ATCC334_GM000569	99.6	1e-128	lcw:BN194_06980	K00262	E1.4.1.4, gdhA	glutamate dehydrogenase (NADP+)	1.4.1.4	Metabolism; Amino acid metabolism; Arginine biosynthesis [PATH:ko00220] Metabolism; Amino acid metabolism; Alanine, aspartate and glutamate metabolism [PATH:ko00250] Metabolism; Energy metabolism; Nitrogen metabolism [PATH:ko00910] Metabolism; Global and overview maps; Metabolic pathways [PATH:ko01100] Metabolism; Global and overview maps; Microbial metabolism in diverse environments [PATH:ko0112…
Lacticaseibacillus_paracasei_ATCC334_GM000570	99.5	1.3e-110	lpi:LBPG_02695	K00262	E1.4.1.4, gdhA	glutamate dehydrogenase (NADP+)	1.4.1.4	Metabolism; Amino acid metabolism; Arginine biosynthesis [PATH:ko00220] Metabolism; Amino acid metabolism; Alanine, aspartate and glutamate metabolism [PATH:ko00250] Metabolism; Energy metabolism; Nitrogen metabolism [PATH:ko00910] Metabolism; Global and overview maps; Metabolic pathways [PATH:ko01100] Metabolism; Global and overview maps; Microbial metabolism in diverse environments [PATH:ko0112…
Lacticaseibacillus_paracasei_ATCC334_GM000571	100	1.9e-31	lrg:LRHM_0594	K03704	cspA	cold shock protein (beta-ribbon, CspA family)	--
Lacticaseibacillus_paracasei_ATCC334_GM000572	100	6.7e-69	lca:LSEI_0637
Lacticaseibacillus_paracasei_ATCC334_GM000573	100	1.8e-77	lcw:BN194_07010
Lacticaseibacillus_paracasei_ATCC334_GM000574	100	2.2e-281	lca:LSEI_0639	K19350	lsa	lincosamide and streptogramin A transport system ATP-binding/permease protein	--	Environmental Information Processing; Membrane transport; ABC transporters [PATH:ko02010]
Lacticaseibacillus_paracasei_ATCC334_GM000575	99.5	6.3e-113	lca:LSEI_0640
Lacticaseibacillus_paracasei_ATCC334_GM000576	100	3.3e-157	lca:LSEI_0641
Lacticaseibacillus_paracasei_ATCC334_GM000577	100	1.7e-248	lca:LSEI_0642	K03293	TC.AAT	amino acid transporter, AAT family	--
Lacticaseibacillus_paracasei_ATCC334_GM000578	99.7	0	lca:LSEI_0643
Lacticaseibacillus_paracasei_ATCC334_GM000579	100	0	lcb:LCABL_07040	K03316	TC.CPA1	monovalent cation:H+ antiporter, CPA1 family	--
Lacticaseibacillus_paracasei_ATCC334_GM000580	100	2.6e-59	lpi:LBPG_02705
Lacticaseibacillus_paracasei_ATCC334_GM000581	100	4.6e-73	lca:LSEI_0646
Lacticaseibacillus_paracasei_ATCC334_GM000582	100	2.6e-149	lca:LSEI_0647	K11051	ABC-2.CYL.P, cylB	multidrug/hemolysin transport system permease protein	--	Environmental Information Processing; Membrane transport; ABC transporters [PATH:ko02010]
Lacticaseibacillus_paracasei_ATCC334_GM000583	100	5.1e-164	lca:LSEI_0648	K11050	ABC-2.CYL.A, cylA	multidrug/hemolysin transport system ATP-binding protein	--	Environmental Information Processing; Membrane transport; ABC transporters [PATH:ko02010]
Lacticaseibacillus_paracasei_ATCC334_GM000584	100	6.4e-147	lca:LSEI_0649
Lacticaseibacillus_paracasei_ATCC334_GM000585	100	2.2e-124	lca:LSEI_0650	K01674	cah	carbonic anhydrase	4.2.1.1	Metabolism; Energy metabolism; Nitrogen metabolism [PATH:ko00910]
Lacticaseibacillus_paracasei_ATCC334_GM000586	100	2.5e-52	lcx:LCA12A_2648
Lacticaseibacillus_paracasei_ATCC334_GM000587	100	2.6e-163	lca:LSEI_0652
Lacticaseibacillus_paracasei_ATCC334_GM000588	98.7	1.1e-255	lcw:BN194_07160	K03320	amt, AMT, MEP	ammonium transporter, Amt family	--
Lacticaseibacillus_paracasei_ATCC334_GM000589	100	3.4e-179	lca:LSEI_0654	K07223	yfeX	porphyrinogen peroxidase	1.11.1.-
Lacticaseibacillus_paracasei_ATCC334_GM000590	99.6	4.9e-119	lca:LSEI_0655	K07507	mgtC	putative Mg2+ transporter-C (MgtC) family protein	--
Lacticaseibacillus_paracasei_ATCC334_GM000591	100	1.6e-148	lca:LSEI_0656	K15051	endA	DNA-entry nuclease	--
Lacticaseibacillus_paracasei_ATCC334_GM000592	100	3.3e-310	lcs:LCBD_0723
Lacticaseibacillus_paracasei_ATCC334_GM000593	100	0	lca:LSEI_0658
Lacticaseibacillus_paracasei_ATCC334_GM000594	99.5	1.7e-112	lcw:BN194_07240
Lacticaseibacillus_paracasei_ATCC334_GM000595	100	4e-132	lca:LSEI_0660	K02440	GLPF	glycerol uptake facilitator protein	--
Lacticaseibacillus_paracasei_ATCC334_GM000596	100	0	lca:LSEI_0661	K00111	glpA, glpD	glycerol-3-phosphate dehydrogenase	1.1.5.3	Metabolism; Lipid metabolism; Glycerophospholipid metabolism [PATH:ko00564] Metabolism; Global and overview maps; Biosynthesis of secondary metabolites [PATH:ko01110]
Lacticaseibacillus_paracasei_ATCC334_GM000597	99.8	7.5e-293	lcw:BN194_07280	K00864	glpK, GK	glycerol kinase	2.7.1.30	Metabolism; Lipid metabolism; Glycerolipid metabolism [PATH:ko00561] Metabolism; Global and overview maps; Metabolic pathways [PATH:ko01100] Organismal Systems; Endocrine system; PPAR signaling pathway [PATH:ko03320] Organismal Systems; Environmental adaptation; Plant-pathogen interaction [PATH:ko04626]
Lacticaseibacillus_paracasei_ATCC334_GM000598	99.2	3.1e-70	lcw:BN194_07290
Lacticaseibacillus_paracasei_ATCC334_GM000599	96	1.4e-47	lce:LC2W_p04
Lacticaseibacillus_paracasei_ATCC334_GM000600	99.7	7.7e-221	lca:LSEI_0664	K00849	galK	galactokinase	2.7.1.6	Metabolism; Carbohydrate metabolism; Galactose metabolism [PATH:ko00052] Metabolism; Carbohydrate metabolism; Amino sugar and nucleotide sugar metabolism [PATH:ko00520] Metabolism; Global and overview maps; Metabolic pathways [PATH:ko01100]
Lacticaseibacillus_paracasei_ATCC334_GM000601	100	9.9e-193	lca:LSEI_0665	K01784	galE, GALE	UDP-glucose 4-epimerase	5.1.3.2	Metabolism; Carbohydrate metabolism; Galactose metabolism [PATH:ko00052] Metabolism; Carbohydrate metabolism; Amino sugar and nucleotide sugar metabolism [PATH:ko00520] Metabolism; Global and overview maps; Metabolic pathways [PATH:ko01100]
Lacticaseibacillus_paracasei_ATCC334_GM000602	99.8	9.5e-285	lca:LSEI_0666	K00965	galT, GALT	UDPglucose--hexose-1-phosphate uridylyltransferase	2.7.7.12	Metabolism; Carbohydrate metabolism; Galactose metabolism [PATH:ko00052] Metabolism; Carbohydrate metabolism; Amino sugar and nucleotide sugar metabolism [PATH:ko00520] Metabolism; Global and overview maps; Metabolic pathways [PATH:ko01100] Organismal Systems; Endocrine system; Prolactin signaling pathway [PATH:ko04917]
Lacticaseibacillus_paracasei_ATCC334_GM000603	100	3.6e-182	lca:LSEI_0667	K02529	lacI, galR	LacI family transcriptional regulator	--
Lacticaseibacillus_paracasei_ATCC334_GM000604	100	1.4e-197	lca:LSEI_0668	K01785	galM, GALM	aldose 1-epimerase	5.1.3.3	Metabolism; Carbohydrate metabolism; Glycolysis / Gluconeogenesis [PATH:ko00010] Metabolism; Carbohydrate metabolism; Galactose metabolism [PATH:ko00052] Metabolism; Global and overview maps; Metabolic pathways [PATH:ko01100] Metabolism; Global and overview maps; Biosynthesis of secondary metabolites [PATH:ko01110] Metabolism; Global and overview maps; Microbial metabolism in diverse environments…
Lacticaseibacillus_paracasei_ATCC334_GM000605	100	3.4e-85	lca:LSEI_0671	K20112	PTS-Gal-EIIA	PTS system, galactose-specific IIA component	2.7.1.204	Environmental Information Processing; Membrane transport; Phosphotransferase system (PTS) [PATH:ko02060]
Lacticaseibacillus_paracasei_ATCC334_GM000606	100	2.2e-50	lpap:LBPC_0593	K20113	PTS-Gal-EIIB	PTS system, galactose-specific IIB component	2.7.1.204	Environmental Information Processing; Membrane transport; Phosphotransferase system (PTS) [PATH:ko02060]
Lacticaseibacillus_paracasei_ATCC334_GM000607	100	2.3e-248	lca:LSEI_0673	K20114	PTS-Gal-EIIC	PTS system, galactose-specific IIC component	--	Environmental Information Processing; Membrane transport; Phosphotransferase system (PTS) [PATH:ko02060]
Lacticaseibacillus_paracasei_ATCC334_GM000608	100	5e-09	lca:LSEI_0674
Lacticaseibacillus_paracasei_ATCC334_GM000609	100	7.1e-126	lca:LSEI_0676
Lacticaseibacillus_paracasei_ATCC334_GM000610	100	2.1e-176	lca:LSEI_0677	K00917	lacC	tagatose 6-phosphate kinase	2.7.1.144	Metabolism; Carbohydrate metabolism; Galactose metabolism [PATH:ko00052] Metabolism; Global and overview maps; Metabolic pathways [PATH:ko01100]
Lacticaseibacillus_paracasei_ATCC334_GM000611	100	1.3e-187	lca:LSEI_0678	K01635	lacD	tagatose 1,6-diphosphate aldolase	4.1.2.40	Metabolism; Carbohydrate metabolism; Galactose metabolism [PATH:ko00052] Metabolism; Global and overview maps; Metabolic pathways [PATH:ko01100] Cellular Processes; Cellular community - prokaryotes; Quorum sensing [PATH:ko02024]
Lacticaseibacillus_paracasei_ATCC334_GM000612	100	9.3e-94	lca:LSEI_0679	K01819	E5.3.1.26, lacA, lacB	galactose-6-phosphate isomerase	5.3.1.26	Metabolism; Carbohydrate metabolism; Galactose metabolism [PATH:ko00052] Metabolism; Global and overview maps; Metabolic pathways [PATH:ko01100]
Lacticaseibacillus_paracasei_ATCC334_GM000613	100	1.2e-73	lca:LSEI_0680	K01819	E5.3.1.26, lacA, lacB	galactose-6-phosphate isomerase	5.3.1.26	Metabolism; Carbohydrate metabolism; Galactose metabolism [PATH:ko00052] Metabolism; Global and overview maps; Metabolic pathways [PATH:ko01100]
Lacticaseibacillus_paracasei_ATCC334_GM000614	100	2e-140	lca:LSEI_0681	K02530	lacR	DeoR family transcriptional regulator, lactose phosphotransferase system repressor	--
Lacticaseibacillus_paracasei_ATCC334_GM000615	100	1e-115	lpap:LBPC_0602
Lacticaseibacillus_paracasei_ATCC334_GM000616	100	1.7e-212	lcs:LCBD_0753	K03547	sbcD, mre11	DNA repair protein SbcD/Mre11	--
Lacticaseibacillus_paracasei_ATCC334_GM000617	100	0	lca:LSEI_0684	K03546	sbcC, rad50	DNA repair protein SbcC/Rad50	--
Lacticaseibacillus_paracasei_ATCC334_GM000618	100	3.4e-14	lpap:LBPC_0605
Lacticaseibacillus_paracasei_ATCC334_GM000619	97.5	8.4e-14	lcb:LCABL_07520
Lacticaseibacillus_paracasei_ATCC334_GM000620	100	1.9e-85	lcb:LCABL_07530	K13993	HSP20	HSP20 family protein	--	Genetic Information Processing; Folding, sorting and degradation; Protein processing in endoplasmic reticulum [PATH:ko04141]
Lacticaseibacillus_paracasei_ATCC334_GM000621	100	2.8e-209	lce:LC2W_0760	K03575	mutY	A/G-specific adenine glycosylase	3.2.2.31	Genetic Information Processing; Replication and repair; Base excision repair [PATH:ko03410]
Lacticaseibacillus_paracasei_ATCC334_GM000622	99.6	5.3e-149	lcl:LOCK919_0790
Lacticaseibacillus_paracasei_ATCC334_GM000623	99.5	1.5e-120	lcs:LCBD_0763
Lacticaseibacillus_paracasei_ATCC334_GM000624	100	1.8e-25	lcs:LCBD_0764
Lacticaseibacillus_paracasei_ATCC334_GM000625	100	5e-87	lca:LSEI_0693
Lacticaseibacillus_paracasei_ATCC334_GM000626	100	6e-119	lpap:LBPC_0613
Lacticaseibacillus_paracasei_ATCC334_GM000627	99.6	9.7e-154	lcs:LCBD_0767	K00941	thiD	hydroxymethylpyrimidine/phosphomethylpyrimidine kinase	2.7.1.49 2.7.4.7	Metabolism; Metabolism of cofactors and vitamins; Thiamine metabolism [PATH:ko00730] Metabolism; Global and overview maps; Metabolic pathways [PATH:ko01100]
Lacticaseibacillus_paracasei_ATCC334_GM000628	100	7e-197	lcw:BN194_07660
Lacticaseibacillus_paracasei_ATCC334_GM000629	100	1.3e-153	lcs:LCBD_0769
Lacticaseibacillus_paracasei_ATCC334_GM000630	100	1.9e-115	lca:LSEI_0698	K07118	K07118	uncharacterized protein	--
Lacticaseibacillus_paracasei_ATCC334_GM000631	100	0	lca:LSEI_0700	K05349	bglX	beta-glucosidase	3.2.1.21	Metabolism; Metabolism of other amino acids; Cyanoamino acid metabolism [PATH:ko00460] Metabolism; Carbohydrate metabolism; Starch and sucrose metabolism [PATH:ko00500] Metabolism; Biosynthesis of other secondary metabolites; Phenylpropanoid biosynthesis [PATH:ko00940] Metabolism; Global and overview maps; Metabolic pathways [PATH:ko01100] Metabolism; Global and overview maps; Biosynthesis of sec…
Lacticaseibacillus_paracasei_ATCC334_GM000632	100	1.1e-147	lca:LSEI_0701	K01989	ABC.X4.S	putative ABC transport system substrate-binding protein	--
Lacticaseibacillus_paracasei_ATCC334_GM000633	100	7.5e-13	lca:LSEI_0702
Lacticaseibacillus_paracasei_ATCC334_GM000634	100	1.4e-167	lca:LSEI_0703	K01989	ABC.X4.S	putative ABC transport system substrate-binding protein	--
Lacticaseibacillus_paracasei_ATCC334_GM000635	100	2.3e-162	lce:LC2W_0777	K05832	ABC.X4.P	putative ABC transport system permease protein	--
Lacticaseibacillus_paracasei_ATCC334_GM000636	100	1.9e-141	lca:LSEI_0705	K05833	ABC.X4.A	putative ABC transport system ATP-binding protein	--
Lacticaseibacillus_paracasei_ATCC334_GM000637	100	1.8e-175	lcb:LCABL_07710
Lacticaseibacillus_paracasei_ATCC334_GM000638	100	0	lca:LSEI_0707
Lacticaseibacillus_paracasei_ATCC334_GM000639	100	2.2e-181	lcx:LCA12A_1735	K20534	gtrB, csbB	polyisoprenyl-phosphate glycosyltransferase	2.4.-.-
Lacticaseibacillus_paracasei_ATCC334_GM000640	100	0	lca:LSEI_0709
Lacticaseibacillus_paracasei_ATCC334_GM000641	100	3.9e-71	lcz:LCAZH_0648
Lacticaseibacillus_paracasei_ATCC334_GM000642	100	3.5e-128	lcs:LCBD_0786	K14983	ciaR	two-component system, OmpR family, response regulator CiaR	--	Environmental Information Processing; Signal transduction; Two-component system [PATH:ko02020] Cellular Processes; Cellular community - prokaryotes; Quorum sensing [PATH:ko02024]
Lacticaseibacillus_paracasei_ATCC334_GM000643	100	7.9e-243	lcx:LCA12A_1739	K14982	ciaH	two-component system, OmpR family, sensor histidine kinase CiaH	2.7.13.3	Environmental Information Processing; Signal transduction; Two-component system [PATH:ko02020] Cellular Processes; Cellular community - prokaryotes; Quorum sensing [PATH:ko02024]
Lacticaseibacillus_paracasei_ATCC334_GM000644	100	7.9e-72	lcw:BN194_07820
Lacticaseibacillus_paracasei_ATCC334_GM000645	100	7.6e-274	lca:LSEI_0714
Lacticaseibacillus_paracasei_ATCC334_GM000646	100	4.6e-162	lcw:BN194_07840
Lacticaseibacillus_paracasei_ATCC334_GM000647	100	1.2e-159	lpap:LBPC_0634	K01574	adc	acetoacetate decarboxylase	4.1.1.4	Metabolism; Lipid metabolism; Synthesis and degradation of ketone bodies [PATH:ko00072] Metabolism; Carbohydrate metabolism; Propanoate metabolism [PATH:ko00640] Metabolism; Global and overview maps; Metabolic pathways [PATH:ko01100]
Lacticaseibacillus_paracasei_ATCC334_GM000648	100	4.6e-122	lca:LSEI_0717
Lacticaseibacillus_paracasei_ATCC334_GM000649	98.9	3e-42	lpap:LBPC_0636
Lacticaseibacillus_paracasei_ATCC334_GM000650	100	2.7e-145	lpi:LBPG_02784
Lacticaseibacillus_paracasei_ATCC334_GM000651	100	5.1e-192	lca:LSEI_0721
Lacticaseibacillus_paracasei_ATCC334_GM000652	100	2.4e-55	lpq:AF91_02760
Lacticaseibacillus_paracasei_ATCC334_GM000653	100	1.4e-52	lpi:LBPG_02787
Lacticaseibacillus_paracasei_ATCC334_GM000654	100	1.5e-48	lca:LSEI_0724
Lacticaseibacillus_paracasei_ATCC334_GM000655	100	3.9e-192	lca:LSEI_0725
Lacticaseibacillus_paracasei_ATCC334_GM000656	100	7.8e-55	lpap:LBPC_0654
Lacticaseibacillus_paracasei_ATCC334_GM000657	100	5.4e-80	lcx:LCA12A_1752
Lacticaseibacillus_paracasei_ATCC334_GM000658	100	5.7e-197	lca:LSEI_0728
Lacticaseibacillus_paracasei_ATCC334_GM000659	100	3.4e-25	lcl:LOCK919_0831
Lacticaseibacillus_paracasei_ATCC334_GM000660	100	2.4e-112	lca:LSEI_0730	K01356	lexA	repressor LexA	3.4.21.88
Lacticaseibacillus_paracasei_ATCC334_GM000661	100	8.3e-65	lca:LSEI_0731
Lacticaseibacillus_paracasei_ATCC334_GM000662	99.7	1.5e-166	lcw:BN194_07990	K07088	K07088	uncharacterized protein	--
Lacticaseibacillus_paracasei_ATCC334_GM000663	100	3.2e-109	lca:LSEI_0733
Lacticaseibacillus_paracasei_ATCC334_GM000664	98.2	2.4e-19	lca:LSEI_0734
Lacticaseibacillus_paracasei_ATCC334_GM000665	100	1e-135	lca:LSEI_0735
Lacticaseibacillus_paracasei_ATCC334_GM000666	100	1.5e-100	lce:LC2W_0811	K01934	MTHFS	5-formyltetrahydrofolate cyclo-ligase	6.3.3.2	Metabolism; Metabolism of cofactors and vitamins; One carbon pool by folate [PATH:ko00670] Metabolism; Global and overview maps; Metabolic pathways [PATH:ko01100]
Lacticaseibacillus_paracasei_ATCC334_GM000667	100	2.2e-62	lpap:LBPC_0664
Lacticaseibacillus_paracasei_ATCC334_GM000668	100	2.4e-166	lpi:LBPG_02803	K03284	corA	magnesium transporter	--
Lacticaseibacillus_paracasei_ATCC334_GM000669	99.7	1.1e-158	lca:LSEI_0739
Lacticaseibacillus_paracasei_ATCC334_GM000670	99.8	0	lca:LSEI_0740	K22212	mleA, mleS	malolactic enzyme	4.1.1.101	Metabolism; Carbohydrate metabolism; Pyruvate metabolism [PATH:ko00620] Metabolism; Global and overview maps; Microbial metabolism in diverse environments [PATH:ko01120]
Lacticaseibacillus_paracasei_ATCC334_GM000671	100	2e-169	lcb:LCABL_08070	K07088	K07088	uncharacterized protein	--
Lacticaseibacillus_paracasei_ATCC334_GM000672	100	3e-89	lcw:BN194_08090	K11065	tpx	thiol peroxidase, atypical 2-Cys peroxiredoxin	1.11.1.15
Lacticaseibacillus_paracasei_ATCC334_GM000673	100	1e-86	lca:LSEI_0743
Lacticaseibacillus_paracasei_ATCC334_GM000674	100	0	lca:LSEI_0745
Lacticaseibacillus_paracasei_ATCC334_GM000675	100	1.6e-54	lcx:LCA12A_1772
Lacticaseibacillus_paracasei_ATCC334_GM000676	99.6	1.5e-132	lcw:BN194_08150
Lacticaseibacillus_paracasei_ATCC334_GM000677	100	1.2e-81	lpq:AF91_10450	K00940	ndk, NME	nucleoside-diphosphate kinase	2.7.4.6	Metabolism; Nucleotide metabolism; Purine metabolism [PATH:ko00230] Metabolism; Nucleotide metabolism; Pyrimidine metabolism [PATH:ko00240] Metabolism; Xenobiotics biodegradation and metabolism; Drug metabolism - other enzymes [PATH:ko00983] Metabolism; Global and overview maps; Metabolic pathways [PATH:ko01100] Metabolism; Global and overview maps; Biosynthesis of secondary metabolites [PATH:ko0…
Lacticaseibacillus_paracasei_ATCC334_GM000678	99.9	0	lcw:BN194_08170	K12952	ctpE	cation-transporting P-type ATPase E	3.6.3.-
Lacticaseibacillus_paracasei_ATCC334_GM000679	100	1.1e-180	lca:LSEI_0750	K01259	pip	proline iminopeptidase	3.4.11.5	Metabolism; Amino acid metabolism; Arginine and proline metabolism [PATH:ko00330]
Lacticaseibacillus_paracasei_ATCC334_GM000680	100	2.1e-57	lpap:LBPC_0680
Lacticaseibacillus_paracasei_ATCC334_GM000681	100	1.6e-93	lca:LSEI_0752
Lacticaseibacillus_paracasei_ATCC334_GM000682	99.5	3.3e-203	lpi:LBPG_02820
Lacticaseibacillus_paracasei_ATCC334_GM000683	100	1.4e-121	lcl:LOCK919_0858	K01091	gph	phosphoglycolate phosphatase	3.1.3.18	Metabolism; Carbohydrate metabolism; Glyoxylate and dicarboxylate metabolism [PATH:ko00630] Metabolism; Global and overview maps; Metabolic pathways [PATH:ko01100] Metabolism; Global and overview maps; Biosynthesis of secondary metabolites [PATH:ko01110] Metabolism; Global and overview maps; Biosynthesis of antibiotics [PATH:ko01130]
Lacticaseibacillus_paracasei_ATCC334_GM000684	100	2.4e-77	lcz:LCAZH_0698
Lacticaseibacillus_paracasei_ATCC334_GM000685	100	2e-179	lcw:BN194_08240	K06889	K06889	uncharacterized protein	--
Lacticaseibacillus_paracasei_ATCC334_GM000686	100	2.1e-84	lca:LSEI_0757	K03647	nrdI	protein involved in ribonucleotide reduction	--
Lacticaseibacillus_paracasei_ATCC334_GM000687	100	5.2e-155	lca:LSEI_0758
Lacticaseibacillus_paracasei_ATCC334_GM000688	100	6e-140	lca:LSEI_0759
Lacticaseibacillus_paracasei_ATCC334_GM000689	100	7.7e-154	lcz:LCAZH_0704
Lacticaseibacillus_paracasei_ATCC334_GM000690	100	6.5e-110	lcx:LCA12A_1787
Lacticaseibacillus_paracasei_ATCC334_GM000691	100	4.3e-74	lce:LC2W_0840
Lacticaseibacillus_paracasei_ATCC334_GM000693	100	1.8e-222	lca:LSEI_0764
Lacticaseibacillus_paracasei_ATCC334_GM000694	100	6.5e-86	lcz:LCAZH_0709	K07173	luxS	S-ribosylhomocysteine lyase	4.4.1.21	Metabolism; Amino acid metabolism; Cysteine and methionine metabolism [PATH:ko00270] Metabolism; Global and overview maps; Metabolic pathways [PATH:ko01100] Metabolism; Global and overview maps; Biosynthesis of amino acids [PATH:ko01230] Cellular Processes; Cellular community - prokaryotes; Quorum sensing [PATH:ko02024] Cellular Processes; Cellular community - prokaryotes; Biofilm formation - Esc…
Lacticaseibacillus_paracasei_ATCC334_GM000695	100	7.7e-193	lca:LSEI_1195
Lacticaseibacillus_paracasei_ATCC334_GM000696	100	4.7e-99	lca:LSEI_0767
Lacticaseibacillus_paracasei_ATCC334_GM000697	100	1.3e-102	lpi:LBPG_02834	K03550	ruvA	holliday junction DNA helicase RuvA	3.6.4.12	Genetic Information Processing; Replication and repair; Homologous recombination [PATH:ko03440]
Lacticaseibacillus_paracasei_ATCC334_GM000698	99.7	5.7e-188	lce:LC2W_0846	K03551	ruvB	holliday junction DNA helicase RuvB	3.6.4.12	Genetic Information Processing; Replication and repair; Homologous recombination [PATH:ko03440]
Lacticaseibacillus_paracasei_ATCC334_GM000699	99.4	3.1e-208	lcw:BN194_08370	K07568	queA	S-adenosylmethionine:tRNA ribosyltransferase-isomerase	2.4.99.17
Lacticaseibacillus_paracasei_ATCC334_GM000700	100	4.6e-226	lca:LSEI_0771	K00773	tgt, QTRT1	queuine tRNA-ribosyltransferase	2.4.2.29
Lacticaseibacillus_paracasei_ATCC334_GM000701	100	1.3e-63	lca:LSEI_0772	K03210	yajC	preprotein translocase subunit YajC	--	Cellular Processes; Cellular community - prokaryotes; Quorum sensing [PATH:ko02024] Genetic Information Processing; Folding, sorting and degradation; Protein export [PATH:ko03060] Environmental Information Processing; Membrane transport; Bacterial secretion system [PATH:ko03070]
Lacticaseibacillus_paracasei_ATCC334_GM000702	100	1.1e-67	lct:BI355_2258
Lacticaseibacillus_paracasei_ATCC334_GM000703	100	3.1e-43	lca:LSEI_0774	K07483	K07483	transposase	--
Lacticaseibacillus_paracasei_ATCC334_GM000704	100	0	lpi:LBPG_02839	K04072	adhE	acetaldehyde dehydrogenase / alcohol dehydrogenase	1.2.1.10 1.1.1.1	Metabolism; Carbohydrate metabolism; Glycolysis / Gluconeogenesis [PATH:ko00010] Metabolism; Lipid metabolism; Fatty acid degradation [PATH:ko00071] Metabolism; Amino acid metabolism; Tyrosine metabolism [PATH:ko00350] Metabolism; Carbohydrate metabolism; Pyruvate metabolism [PATH:ko00620] Metabolism; Xenobiotics biodegradation and metabolism; Chloroalkane and chloroalkene degradation [PATH:ko006…
Lacticaseibacillus_paracasei_ATCC334_GM000705	100	4.8e-116	lca:LSEI_0777	K03709	troR	DtxR family transcriptional regulator, Mn-dependent transcriptional regulator	--
Lacticaseibacillus_paracasei_ATCC334_GM000706	100	5.8e-290	lca:LSEI_0778	K00036	G6PD, zwf	glucose-6-phosphate 1-dehydrogenase	1.1.1.49 1.1.1.363	Metabolism; Carbohydrate metabolism; Pentose phosphate pathway [PATH:ko00030] Metabolism; Metabolism of other amino acids; Glutathione metabolism [PATH:ko00480] Metabolism; Global and overview maps; Metabolic pathways [PATH:ko01100] Metabolism; Global and overview maps; Biosynthesis of secondary metabolites [PATH:ko01110] Metabolism; Global and overview maps; Microbial metabolism in diverse envir…
Lacticaseibacillus_paracasei_ATCC334_GM000707	100	2.1e-207	lca:LSEI_0779	K02346	dinB	DNA polymerase IV	2.7.7.7
Lacticaseibacillus_paracasei_ATCC334_GM000708	100	4.4e-241	lca:LSEI_0780
Lacticaseibacillus_paracasei_ATCC334_GM000709	100	1.7e-178	lca:LSEI_0781	K06881	nrnA	bifunctional oligoribonuclease and PAP phosphatase NrnA	3.1.3.7 3.1.13.3	Metabolism; Energy metabolism; Sulfur metabolism [PATH:ko00920] Metabolism; Global and overview maps; Metabolic pathways [PATH:ko01100] Metabolism; Global and overview maps; Microbial metabolism in diverse environments [PATH:ko01120]
Lacticaseibacillus_paracasei_ATCC334_GM000710	100	1.2e-249	lca:LSEI_0782	K18692	cshB	ATP-dependent RNA helicase CshB	3.6.4.13
Lacticaseibacillus_paracasei_ATCC334_GM000711	100	3e-175	lca:LSEI_0783
Lacticaseibacillus_paracasei_ATCC334_GM000712	100	0	lca:LSEI_0784	K01872	AARS, alaS	alanyl-tRNA synthetase	6.1.1.7	Genetic Information Processing; Translation; Aminoacyl-tRNA biosynthesis [PATH:ko00970]
Lacticaseibacillus_paracasei_ATCC334_GM000713	100	4.9e-43	lcb:LCABL_08470
Lacticaseibacillus_paracasei_ATCC334_GM000714	100	2.6e-73	lcs:LCBD_0862	K07447	ruvX	putative holliday junction resolvase	3.1.-.-
Lacticaseibacillus_paracasei_ATCC334_GM000715	100	4.2e-52	lca:LSEI_0788
Lacticaseibacillus_paracasei_ATCC334_GM000716	100	1.2e-35	lcl:LOCK919_0890	K09888	zapA	cell division protein ZapA	--
Lacticaseibacillus_paracasei_ATCC334_GM000717	100	9e-92	lcb:LCABL_08510
Lacticaseibacillus_paracasei_ATCC334_GM000718	100	0	lca:LSEI_0791	K07456	mutS2	DNA mismatch repair protein MutS2	--	Genetic Information Processing; Replication and repair; Mismatch repair [PATH:ko03430]
Lacticaseibacillus_paracasei_ATCC334_GM000719	100	1.4e-52	lcl:LOCK919_0893	K03671	trxA	thioredoxin 1	--	Organismal Systems; Immune system; NOD-like receptor signaling pathway [PATH:ko04621] Human Diseases; Cardiovascular diseases; Fluid shear stress and atherosclerosis [PATH:ko05418]
Lacticaseibacillus_paracasei_ATCC334_GM000720	100	1.5e-293	lcz:LCAZH_0737	K03367	dltA	D-alanine--poly(phosphoribitol) ligase subunit 1	6.1.1.13	Metabolism; Metabolism of other amino acids; D-Alanine metabolism [PATH:ko00473] Human Diseases; Drug resistance: Antimicrobial; Cationic antimicrobial peptide (CAMP) resistance [PATH:ko01503] Environmental Information Processing; Signal transduction; Two-component system [PATH:ko02020] Human Diseases; Infectious diseases: Bacterial; Staphylococcus aureus infection [PATH:ko05150]
Lacticaseibacillus_paracasei_ATCC334_GM000721	100	3.6e-237	lca:LSEI_0795	K03739	dltB	membrane protein involved in D-alanine export	--	Human Diseases; Drug resistance: Antimicrobial; Cationic antimicrobial peptide (CAMP) resistance [PATH:ko01503] Environmental Information Processing; Signal transduction; Two-component system [PATH:ko02020] Human Diseases; Infectious diseases: Bacterial; Staphylococcus aureus infection [PATH:ko05150]
Lacticaseibacillus_paracasei_ATCC334_GM000722	100	5.4e-36	lce:LC2W_0872	K14188	dltC	D-alanine--poly(phosphoribitol) ligase subunit 2	6.1.1.13	Metabolism; Metabolism of other amino acids; D-Alanine metabolism [PATH:ko00473] Human Diseases; Drug resistance: Antimicrobial; Cationic antimicrobial peptide (CAMP) resistance [PATH:ko01503] Environmental Information Processing; Signal transduction; Two-component system [PATH:ko02020] Human Diseases; Infectious diseases: Bacterial; Staphylococcus aureus infection [PATH:ko05150]
Lacticaseibacillus_paracasei_ATCC334_GM000723	100	4.9e-245	lpi:LBPG_02860	K03740	dltD	D-alanine transfer protein	--	Human Diseases; Drug resistance: Antimicrobial; Cationic antimicrobial peptide (CAMP) resistance [PATH:ko01503] Environmental Information Processing; Signal transduction; Two-component system [PATH:ko02020] Human Diseases; Infectious diseases: Bacterial; Staphylococcus aureus infection [PATH:ko05150]
Lacticaseibacillus_paracasei_ATCC334_GM000724	100	3.1e-86	lca:LSEI_0798
Lacticaseibacillus_paracasei_ATCC334_GM000725	100	3.6e-276	lca:LSEI_0799
Lacticaseibacillus_paracasei_ATCC334_GM000726	100	2.6e-96	lcz:LCAZH_0743	K07095	K07095	uncharacterized protein	--
Lacticaseibacillus_paracasei_ATCC334_GM000727	100	8.2e-136	lca:LSEI_0801	K02440	GLPF	glycerol uptake facilitator protein	--
Lacticaseibacillus_paracasei_ATCC334_GM000728	100	6.7e-86	lpap:LBPC_0727
Lacticaseibacillus_paracasei_ATCC334_GM000729	100	7.2e-158	lca:LSEI_0803	K08974	K08974	putative membrane protein	--
Lacticaseibacillus_paracasei_ATCC334_GM000730	100	4.4e-152	lca:LSEI_0804	K22044	ybiO	moderate conductance mechanosensitive channel	--
Lacticaseibacillus_paracasei_ATCC334_GM000731	100	2.1e-35	lcb:LCABL_08660
Lacticaseibacillus_paracasei_ATCC334_GM000732	100	4.6e-88	lca:LSEI_0806
Lacticaseibacillus_paracasei_ATCC334_GM000733	100	1.4e-89	lpi:LBPG_02871	K07105	K07105	uncharacterized protein	--
Lacticaseibacillus_paracasei_ATCC334_GM000734	100	1.3e-214	lca:LSEI_0808	K01271	pepQ	Xaa-Pro dipeptidase	3.4.13.9
Lacticaseibacillus_paracasei_ATCC334_GM000735	99.7	8.7e-181	lcw:BN194_08750	K02529	lacI, galR	LacI family transcriptional regulator	--
Lacticaseibacillus_paracasei_ATCC334_GM000736	99.9	0	lca:LSEI_0810	K03693	pbp1b	penicillin-binding protein 1B	--	Metabolism; Glycan biosynthesis and metabolism; Peptidoglycan biosynthesis [PATH:ko00550] Metabolism; Global and overview maps; Metabolic pathways [PATH:ko01100] Human Diseases; Drug resistance: Antimicrobial; beta-Lactam resistance [PATH:ko01501]
Lacticaseibacillus_paracasei_ATCC334_GM000737	100	1.9e-126	lca:LSEI_0811	K07025	K07025	putative hydrolase of the HAD superfamily	--
Lacticaseibacillus_paracasei_ATCC334_GM000738	100	4.4e-137	lca:LSEI_0812	K03524	birA	BirA family transcriptional regulator, biotin operon repressor / biotin---[acetyl-CoA-carboxylase] ligase	6.3.4.15	Metabolism; Metabolism of cofactors and vitamins; Biotin metabolism [PATH:ko00780] Metabolism; Global and overview maps; Metabolic pathways [PATH:ko01100]
Lacticaseibacillus_paracasei_ATCC334_GM000739	100	1.7e-270	lca:LSEI_0813
Lacticaseibacillus_paracasei_ATCC334_GM000740	100	4.5e-257	lpq:AF91_10125	K01126	E3.1.4.46, glpQ, ugpQ	glycerophosphoryl diester phosphodiesterase	3.1.4.46	Metabolism; Lipid metabolism; Glycerophospholipid metabolism [PATH:ko00564]
Lacticaseibacillus_paracasei_ATCC334_GM000741	100	1.5e-54	lcx:LCA12A_0654
Lacticaseibacillus_paracasei_ATCC334_GM000742	98	1.2e-17	lcw:BN194_08840
Lacticaseibacillus_paracasei_ATCC334_GM000743	100	1.6e-188	lcz:LCAZH_0762
Lacticaseibacillus_paracasei_ATCC334_GM000744	100	2.2e-117	lpq:AF91_10110
Lacticaseibacillus_paracasei_ATCC334_GM000745	100	1.5e-114	lpap:LBPC_0743
Lacticaseibacillus_paracasei_ATCC334_GM000746	99.8	4.2e-266	lca:LSEI_0819
Lacticaseibacillus_paracasei_ATCC334_GM000747	100	5.2e-118	lca:LSEI_0820
Lacticaseibacillus_paracasei_ATCC334_GM000748	100	1.9e-140	lca:LSEI_0821	K01101	E3.1.3.41	4-nitrophenyl phosphatase	3.1.3.41	Metabolism; Xenobiotics biodegradation and metabolism; Aminobenzoate degradation [PATH:ko00627] Metabolism; Global and overview maps; Microbial metabolism in diverse environments [PATH:ko01120]
Lacticaseibacillus_paracasei_ATCC334_GM000749	100	1.8e-112	lca:LSEI_0822
Lacticaseibacillus_paracasei_ATCC334_GM000750	100	1.4e-115	lca:LSEI_0824	K03975	dedA	membrane-associated protein	--
Lacticaseibacillus_paracasei_ATCC334_GM000751	100	2.5e-88	lpi:LBPG_02889
Lacticaseibacillus_paracasei_ATCC334_GM000752	100	3e-186	lpq:AF91_10065	K21567	fnr	ferredoxin/flavodoxin---NADP+ reductase	1.18.1.2 1.19.1.1
Lacticaseibacillus_paracasei_ATCC334_GM000753	100	8.8e-109	lpq:AF91_10060	K03768	PPIB, ppiB	peptidyl-prolyl cis-trans isomerase B (cyclophilin B)	5.2.1.8
Lacticaseibacillus_paracasei_ATCC334_GM000754	100	6.5e-68	lcs:LCBD_0906	K07570	GSP13	general stress protein 13	--
Lacticaseibacillus_paracasei_ATCC334_GM000756	100	1.7e-27	lpq:AF91_03515
Lacticaseibacillus_paracasei_ATCC334_GM000757	100	8.3e-62	lca:LSEI_2167	K07484	K07484	transposase	--
Lacticaseibacillus_paracasei_ATCC334_GM000758	100	6.3e-292	lcb:LCABL_04100
Lacticaseibacillus_paracasei_ATCC334_GM000759	100	2.6e-94	lca:LSEI_0859	K03091	sigH	RNA polymerase sporulation-specific sigma factor	--
Lacticaseibacillus_paracasei_ATCC334_GM000761	99.7	3.7e-201	lcl:LOCK919_0962
Lacticaseibacillus_paracasei_ATCC334_GM000762	99.8	7.2e-230	lcs:LCBD_0913	K19002	mgs, bgsB	1,2-diacylglycerol 3-alpha-glucosyltransferase	2.4.1.337	Metabolism; Lipid metabolism; Glycerolipid metabolism [PATH:ko00561] Metabolism; Global and overview maps; Metabolic pathways [PATH:ko01100]
Lacticaseibacillus_paracasei_ATCC334_GM000763	100	6.8e-197	lcw:BN194_09050	K13678	cpoA	1,2-diacylglycerol-3-alpha-glucose alpha-1,2-galactosyltransferase	2.4.1.-
Lacticaseibacillus_paracasei_ATCC334_GM000764	100	2.6e-172	lcs:LCBD_0915	K07027	K07027	glycosyltransferase 2 family protein	--
Lacticaseibacillus_paracasei_ATCC334_GM000765	100	3e-59	lca:LSEI_0864
Lacticaseibacillus_paracasei_ATCC334_GM000766	100	3.3e-219	lcb:LCABL_09310	K00841	patA	aminotransferase	2.6.1.-	Metabolism; Amino acid metabolism; Lysine biosynthesis [PATH:ko00300] Metabolism; Global and overview maps; Metabolic pathways [PATH:ko01100] Metabolism; Global and overview maps; Biosynthesis of secondary metabolites [PATH:ko01110] Metabolism; Global and overview maps; Biosynthesis of amino acids [PATH:ko01230]
Lacticaseibacillus_paracasei_ATCC334_GM000767	100	3.9e-43	lcz:LCAZH_0809
Lacticaseibacillus_paracasei_ATCC334_GM000768	100	0	lca:LSEI_0868	K19005	ltaS	lipoteichoic acid synthase	2.7.8.20	Metabolism; Lipid metabolism; Glycerolipid metabolism [PATH:ko00561] Metabolism; Global and overview maps; Metabolic pathways [PATH:ko01100]
Lacticaseibacillus_paracasei_ATCC334_GM000769	100	8.5e-80	lpq:AF91_09840	K09825	perR	Fur family transcriptional regulator, peroxide stress response regulator	--
Lacticaseibacillus_paracasei_ATCC334_GM000770	99.5	7.5e-109	lca:LSEI_0876
Lacticaseibacillus_paracasei_ATCC334_GM000771	96.4	1.9e-24	lpq:AF91_09790
Lacticaseibacillus_paracasei_ATCC334_GM000772	100	1.1e-209	lcl:LOCK919_0980	K00789	metK	S-adenosylmethionine synthetase	2.5.1.6	Metabolism; Amino acid metabolism; Cysteine and methionine metabolism [PATH:ko00270] Metabolism; Global and overview maps; Metabolic pathways [PATH:ko01100] Metabolism; Global and overview maps; Biosynthesis of secondary metabolites [PATH:ko01110] Metabolism; Global and overview maps; Biosynthesis of amino acids [PATH:ko01230]
Lacticaseibacillus_paracasei_ATCC334_GM000773	100	1.1e-269	lce:LC2W_0930
Lacticaseibacillus_paracasei_ATCC334_GM000774	100	5.1e-83	lcx:LCA12A_2169
Lacticaseibacillus_paracasei_ATCC334_GM000775	100	1.6e-263	lca:LSEI_0880
Lacticaseibacillus_paracasei_ATCC334_GM000776	100	7.3e-121	lca:LSEI_0881
Lacticaseibacillus_paracasei_ATCC334_GM000777	100	2.2e-116	lca:LSEI_0882	K19302	bcrC	undecaprenyl-diphosphatase	3.6.1.27	Metabolism; Glycan biosynthesis and metabolism; Peptidoglycan biosynthesis [PATH:ko00550]
Lacticaseibacillus_paracasei_ATCC334_GM000778	100	0	lcb:LCABL_09490	K01869	LARS, leuS	leucyl-tRNA synthetase	6.1.1.4	Genetic Information Processing; Translation; Aminoacyl-tRNA biosynthesis [PATH:ko00970]
Lacticaseibacillus_paracasei_ATCC334_GM000779	100	6.2e-293	lcw:BN194_09220
Lacticaseibacillus_paracasei_ATCC334_GM000780	100	1.9e-129	lcx:LCA12A_2176	K06183	rsuA	16S rRNA pseudouridine516 synthase	5.4.99.19
Lacticaseibacillus_paracasei_ATCC334_GM000781	100	2.2e-142	lcb:LCABL_09520	K17758	nnr	ADP-dependent NAD(P)H-hydrate dehydratase	4.2.1.136
Lacticaseibacillus_paracasei_ATCC334_GM000782	100	3.7e-95	lpap:LBPC_0830
Lacticaseibacillus_paracasei_ATCC334_GM000783	100	1.9e-288	lca:LSEI_0891	K00712	tagE	poly(glycerol-phosphate) alpha-glucosyltransferase	2.4.1.52
Lacticaseibacillus_paracasei_ATCC334_GM000784	100	1.4e-305	lca:LSEI_0892	K00712	tagE	poly(glycerol-phosphate) alpha-glucosyltransferase	2.4.1.52
Lacticaseibacillus_paracasei_ATCC334_GM000785	100	3.2e-85	lca:LSEI_0893	K00432	gpx	glutathione peroxidase	1.11.1.9	Metabolism; Metabolism of other amino acids; Glutathione metabolism [PATH:ko00480] Metabolism; Lipid metabolism; Arachidonic acid metabolism [PATH:ko00590] Organismal Systems; Endocrine system; Thyroid hormone synthesis [PATH:ko04918]
Lacticaseibacillus_paracasei_ATCC334_GM000786	100	1.1e-233	lca:LSEI_0894	K14155	patB, malY	cysteine-S-conjugate beta-lyase	4.4.1.13	Metabolism; Amino acid metabolism; Cysteine and methionine metabolism [PATH:ko00270] Metabolism; Metabolism of other amino acids; Selenocompound metabolism [PATH:ko00450] Metabolism; Global and overview maps; Metabolic pathways [PATH:ko01100] Metabolism; Global and overview maps; Biosynthesis of secondary metabolites [PATH:ko01110] Metabolism; Global and overview maps; Biosynthesis of amino acids…
Lacticaseibacillus_paracasei_ATCC334_GM000787	100	8.1e-259	lca:LSEI_0895
Lacticaseibacillus_paracasei_ATCC334_GM000788	100	1.7e-38	lca:LSEI_0896	K07166	K07166	ACT domain-containing protein	--
Lacticaseibacillus_paracasei_ATCC334_GM000789	100	2.3e-245	lca:LSEI_0897	K09157	K09157	uncharacterized protein	--
Lacticaseibacillus_paracasei_ATCC334_GM000790	100	1e-177	lca:LSEI_0898	K06198	coiA	competence protein CoiA	--
Lacticaseibacillus_paracasei_ATCC334_GM000791	100	4.2e-100	lca:LSEI_0899
Lacticaseibacillus_paracasei_ATCC334_GM000792	100	1.4e-106	lce:LC2W_1000
Lacticaseibacillus_paracasei_ATCC334_GM000793	100	2.8e-116	lca:LSEI_0901	K07816	E2.7.6.5X	putative GTP pyrophosphokinase	2.7.6.5	Metabolism; Nucleotide metabolism; Purine metabolism [PATH:ko00230]
Lacticaseibacillus_paracasei_ATCC334_GM000794	100	8.9e-152	lcb:LCABL_10160	K00858	ppnK, NADK	NAD+ kinase	2.7.1.23	Metabolism; Metabolism of cofactors and vitamins; Nicotinate and nicotinamide metabolism [PATH:ko00760] Metabolism; Global and overview maps; Metabolic pathways [PATH:ko01100]
Lacticaseibacillus_paracasei_ATCC334_GM000795	100	4.8e-170	lca:LSEI_0903	K06180	rluD	23S rRNA pseudouridine1911/1915/1917 synthase	5.4.99.23
Lacticaseibacillus_paracasei_ATCC334_GM000796	100	2.5e-202	lpq:AF91_09390	K03734	apbE	FAD:protein FMN transferase	2.7.1.180
Lacticaseibacillus_paracasei_ATCC334_GM000797	100	2e-114	lcb:LCABL_10190	K06201	cutC	copper homeostasis protein	--
Lacticaseibacillus_paracasei_ATCC334_GM000798	100	2e-146	lcx:LCA12A_2195	K06153	bacA	undecaprenyl-diphosphatase	3.6.1.27	Metabolism; Glycan biosynthesis and metabolism; Peptidoglycan biosynthesis [PATH:ko00550]
Lacticaseibacillus_paracasei_ATCC334_GM000799	100	8.7e-189	lca:LSEI_0907
Lacticaseibacillus_paracasei_ATCC334_GM000800	100	1.9e-199	lpi:LBPG_00077	K07404	pgl	6-phosphogluconolactonase	3.1.1.31	Metabolism; Carbohydrate metabolism; Pentose phosphate pathway [PATH:ko00030] Metabolism; Global and overview maps; Metabolic pathways [PATH:ko01100] Metabolism; Global and overview maps; Biosynthesis of secondary metabolites [PATH:ko01110] Metabolism; Global and overview maps; Microbial metabolism in diverse environments [PATH:ko01120] Metabolism; Global and overview maps; Biosynthesis of antibi…
Lacticaseibacillus_paracasei_ATCC334_GM000801	100	2.3e-62	lcl:LOCK919_1053	K02781	PTS-Gut-EIIA, srlB	PTS system, glucitol/sorbitol-specific IIA component	2.7.1.198	Metabolism; Carbohydrate metabolism; Fructose and mannose metabolism [PATH:ko00051] Environmental Information Processing; Membrane transport; Phosphotransferase system (PTS) [PATH:ko02060]
Lacticaseibacillus_paracasei_ATCC334_GM000802	100	1.2e-41	lcx:LCA12A_2198	K02954	RP-S14, MRPS14, rpsN	small subunit ribosomal protein S14	--	Genetic Information Processing; Translation; Ribosome [PATH:ko03010]
Lacticaseibacillus_paracasei_ATCC334_GM000803	99.7	9.9e-193	lcw:BN194_09960	K00364	E1.7.1.7, guaC	GMP reductase	1.7.1.7	Metabolism; Nucleotide metabolism; Purine metabolism [PATH:ko00230]
Lacticaseibacillus_paracasei_ATCC334_GM000804	100	3.5e-91	lpap:LBPC_0852	K03284	corA	magnesium transporter	--
Lacticaseibacillus_paracasei_ATCC334_GM000805	90.1	6.9e-51	lrl:LC705_00926	K03284	corA	magnesium transporter	--
Lacticaseibacillus_paracasei_ATCC334_GM000806	100	2.5e-157	lca:LSEI_0913	K00563	rlmA1	23S rRNA (guanine745-N1)-methyltransferase	2.1.1.187
Lacticaseibacillus_paracasei_ATCC334_GM000807	100	2.8e-95	lca:LSEI_0914	K03216	trmL, cspR	tRNA (cytidine/uridine-2'-O-)-methyltransferase	2.1.1.207
Lacticaseibacillus_paracasei_ATCC334_GM000808	100	1.8e-71	lpi:LBPG_00084
Lacticaseibacillus_paracasei_ATCC334_GM000809	100	0	lca:LSEI_0916	K03466	ftsK, spoIIIE	DNA segregation ATPase FtsK/SpoIIIE, S-DNA-T family	--
Lacticaseibacillus_paracasei_ATCC334_GM000810	100	4.7e-232	lca:LSEI_0917
Lacticaseibacillus_paracasei_ATCC334_GM000811	100	3.6e-243	lca:LSEI_0918
Lacticaseibacillus_paracasei_ATCC334_GM000812	100	9.6e-129	lpq:AF91_09320	K00059	fabG	3-oxoacyl-[acyl-carrier protein] reductase	1.1.1.100	Metabolism; Lipid metabolism; Fatty acid biosynthesis [PATH:ko00061] Metabolism; Biosynthesis of other secondary metabolites; Prodigiosin biosynthesis [PATH:ko00333] Metabolism; Metabolism of cofactors and vitamins; Biotin metabolism [PATH:ko00780] Metabolism; Lipid metabolism; Biosynthesis of unsaturated fatty acids [PATH:ko01040] Metabolism; Global and overview maps; Metabolic pathways [PATH:ko…
Lacticaseibacillus_paracasei_ATCC334_GM000813	100	6.3e-133	lca:LSEI_0920
Lacticaseibacillus_paracasei_ATCC334_GM000814	100	1.3e-104	lcl:LOCK919_1065	K00995	pgsA, PGS1	CDP-diacylglycerol---glycerol-3-phosphate 3-phosphatidyltransferase	2.7.8.5	Metabolism; Lipid metabolism; Glycerophospholipid metabolism [PATH:ko00564] Metabolism; Global and overview maps; Metabolic pathways [PATH:ko01100]
Lacticaseibacillus_paracasei_ATCC334_GM000815	100	4.3e-230	lca:LSEI_0922	K03742	pncC	nicotinamide-nucleotide amidase	3.5.1.42	Metabolism; Metabolism of cofactors and vitamins; Nicotinate and nicotinamide metabolism [PATH:ko00760]
Lacticaseibacillus_paracasei_ATCC334_GM000816	100	8.9e-192	lca:LSEI_0923	K03553	recA	recombination protein RecA	--	Genetic Information Processing; Replication and repair; Homologous recombination [PATH:ko03440]
Lacticaseibacillus_paracasei_ATCC334_GM000817	100	3.7e-250	lcx:LCA12A_2212	K18682	rny	ribonucrease Y	3.1.-.-	Genetic Information Processing; Folding, sorting and degradation; RNA degradation [PATH:ko03018]
Lacticaseibacillus_paracasei_ATCC334_GM000818	100	4.4e-117	lcl:LOCK919_1069
Lacticaseibacillus_paracasei_ATCC334_GM000820	100	5.2e-178	lca:LSEI_0926	K02240	comFA	competence protein ComFA	--
Lacticaseibacillus_paracasei_ATCC334_GM000821	100	1.1e-73	lcs:LCBD_1022	K02242	comFC	competence protein ComFC	--
Lacticaseibacillus_paracasei_ATCC334_GM000822	100	5.7e-97	lcb:LCABL_10410
Lacticaseibacillus_paracasei_ATCC334_GM000823	100	0	lce:LC2W_1029	K03070	secA	preprotein translocase subunit SecA	--	Cellular Processes; Cellular community - prokaryotes; Quorum sensing [PATH:ko02024] Genetic Information Processing; Folding, sorting and degradation; Protein export [PATH:ko03060] Environmental Information Processing; Membrane transport; Bacterial secretion system [PATH:ko03070]
Lacticaseibacillus_paracasei_ATCC334_GM000824	100	1.2e-185	lpi:LBPG_00101	K02836	prfB	peptide chain release factor 2	--
Lacticaseibacillus_paracasei_ATCC334_GM000825	100	4.6e-125	lpi:LBPG_00102	K09812	ftsE	cell division transport system ATP-binding protein	--	Environmental Information Processing; Membrane transport; ABC transporters [PATH:ko02010]
Lacticaseibacillus_paracasei_ATCC334_GM000826	100	3.9e-156	lcx:LCA12A_2220	K09811	ftsX	cell division transport system permease protein	--	Environmental Information Processing; Membrane transport; ABC transporters [PATH:ko02010]
Lacticaseibacillus_paracasei_ATCC334_GM000827	100	3.6e-202	lcs:LCBD_1028
Lacticaseibacillus_paracasei_ATCC334_GM000828	100	2.9e-130	lcw:BN194_10220	K07658	phoB1, phoP	two-component system, OmpR family, alkaline phosphatase synthesis response regulator PhoP	--	Environmental Information Processing; Signal transduction; Two-component system [PATH:ko02020]
Lacticaseibacillus_paracasei_ATCC334_GM000829	100	3.1e-308	lca:LSEI_0935	K07636	phoR	two-component system, OmpR family, phosphate regulon sensor histidine kinase PhoR	2.7.13.3	Environmental Information Processing; Signal transduction; Two-component system [PATH:ko02020]
Lacticaseibacillus_paracasei_ATCC334_GM000830	100	5.1e-153	lca:LSEI_0936	K02040	pstS	phosphate transport system substrate-binding protein	--	Environmental Information Processing; Membrane transport; ABC transporters [PATH:ko02010] Environmental Information Processing; Signal transduction; Two-component system [PATH:ko02020] Human Diseases; Infectious diseases: Bacterial; Tuberculosis [PATH:ko05152]
Lacticaseibacillus_paracasei_ATCC334_GM000831	100	1e-159	lca:LSEI_0937	K02037	pstC	phosphate transport system permease protein	--	Environmental Information Processing; Membrane transport; ABC transporters [PATH:ko02010]
Lacticaseibacillus_paracasei_ATCC334_GM000832	100	4.5e-157	lpi:LBPG_00109	K02038	pstA	phosphate transport system permease protein	--	Environmental Information Processing; Membrane transport; ABC transporters [PATH:ko02010]
Lacticaseibacillus_paracasei_ATCC334_GM000833	100	1.4e-149	lpq:AF91_09220	K02036	pstB	phosphate transport system ATP-binding protein	7.3.2.1	Environmental Information Processing; Membrane transport; ABC transporters [PATH:ko02010]
Lacticaseibacillus_paracasei_ATCC334_GM000834	100	9.7e-140	lpi:LBPG_00111	K02036	pstB	phosphate transport system ATP-binding protein	7.3.2.1	Environmental Information Processing; Membrane transport; ABC transporters [PATH:ko02010]
Lacticaseibacillus_paracasei_ATCC334_GM000835	100	1.2e-120	lcb:LCABL_10550	K02039	phoU	phosphate transport system protein	--
Lacticaseibacillus_paracasei_ATCC334_GM000836	100	2.7e-271	lca:LSEI_0942
Lacticaseibacillus_paracasei_ATCC334_GM000837	100	2.5e-33	lcw:BN194_10310
Lacticaseibacillus_paracasei_ATCC334_GM000838	100	1.4e-37	lcx:LCA12A_2232	K08972	K08972	putative membrane protein	--
Lacticaseibacillus_paracasei_ATCC334_GM000839	100	1.3e-173	lcz:LCAZH_0888	K06023	hprK, ptsK	HPr kinase/phosphorylase	2.7.11.- 2.7.4.-
Lacticaseibacillus_paracasei_ATCC334_GM000840	100	4.3e-157	lpap:LBPC_0886	K13292	lgt, umpA	phosphatidylglycerol---prolipoprotein diacylglyceryl transferase	2.5.1.145
Lacticaseibacillus_paracasei_ATCC334_GM000841	100	3.3e-191	lca:LSEI_0947	K00057	gpsA	glycerol-3-phosphate dehydrogenase (NAD(P)+)	1.1.1.94	Metabolism; Lipid metabolism; Glycerophospholipid metabolism [PATH:ko00564] Metabolism; Global and overview maps; Biosynthesis of secondary metabolites [PATH:ko01110]
Lacticaseibacillus_paracasei_ATCC334_GM000842	100	5e-178	lpi:LBPG_00119	K00384	trxB, TRR	thioredoxin reductase (NADPH)	1.8.1.9	Metabolism; Metabolism of other amino acids; Selenocompound metabolism [PATH:ko00450]
Lacticaseibacillus_paracasei_ATCC334_GM000843	99.1	0	lcw:BN194_10370	K01835	pgm	phosphoglucomutase	5.4.2.2	Metabolism; Carbohydrate metabolism; Glycolysis / Gluconeogenesis [PATH:ko00010] Metabolism; Carbohydrate metabolism; Pentose phosphate pathway [PATH:ko00030] Metabolism; Carbohydrate metabolism; Galactose metabolism [PATH:ko00052] Metabolism; Nucleotide metabolism; Purine metabolism [PATH:ko00230] Metabolism; Carbohydrate metabolism; Starch and sucrose metabolism [PATH:ko00500] Metabolism; Carbo…
Lacticaseibacillus_paracasei_ATCC334_GM000844	100	2.7e-114	lca:LSEI_0950
Lacticaseibacillus_paracasei_ATCC334_GM000845	100	1e-181	lca:LSEI_0951
Lacticaseibacillus_paracasei_ATCC334_GM000846	99.5	2e-117	lca:LSEI_0952	K02003	ABC.CD.A	putative ABC transport system ATP-binding protein	--
Lacticaseibacillus_paracasei_ATCC334_GM000847	100	0	lca:LSEI_0953	K02004	ABC.CD.P	putative ABC transport system permease protein	--
Lacticaseibacillus_paracasei_ATCC334_GM000848	100	5.6e-20	lca:LSEI_0954
Lacticaseibacillus_paracasei_ATCC334_GM000849	100	2.3e-118	lcz:LCAZH_0897	K07023	K07023	putative hydrolases of HD superfamily	--
Lacticaseibacillus_paracasei_ATCC334_GM000850	100	0	lpq:AF91_09135	K03702	uvrB	excinuclease ABC subunit B	--	Genetic Information Processing; Replication and repair; Nucleotide excision repair [PATH:ko03420]
Lacticaseibacillus_paracasei_ATCC334_GM000851	100	0	lca:LSEI_0957	K03701	uvrA	excinuclease ABC subunit A	--	Genetic Information Processing; Replication and repair; Nucleotide excision repair [PATH:ko03420]
Lacticaseibacillus_paracasei_ATCC334_GM000852	100	1.7e-85	lca:LSEI_0958
Lacticaseibacillus_paracasei_ATCC334_GM000853	100	2e-165	lce:LC2W_1061	K06958	rapZ	RNase adapter protein RapZ	--
Lacticaseibacillus_paracasei_ATCC334_GM000854	100	1.6e-193	lcs:LCBD_1057
Lacticaseibacillus_paracasei_ATCC334_GM000855	100	3.1e-172	lcl:LOCK919_1107	K09762	K09762	uncharacterized protein	--
Lacticaseibacillus_paracasei_ATCC334_GM000856	100	1.4e-80	lpq:AF91_09105
Lacticaseibacillus_paracasei_ATCC334_GM000857	100	1.4e-101	lcw:BN194_10510	K01358	clpP, CLPP	ATP-dependent Clp protease, protease subunit	3.4.21.92	Cellular Processes; Cell growth and death; Cell cycle - Caulobacter [PATH:ko04112] Organismal Systems; Aging; Longevity regulating pathway - worm [PATH:ko04212]
Lacticaseibacillus_paracasei_ATCC334_GM000858	100	3.6e-53	lca:LSEI_0965
Lacticaseibacillus_paracasei_ATCC334_GM000859	100	4.5e-188	lce:LC2W_1116	K05311	cggR	central glycolytic genes regulator	--
Lacticaseibacillus_paracasei_ATCC334_GM000860	100	7.8e-193	lpap:LBPC_0906	K00134	GAPDH, gapA	glyceraldehyde 3-phosphate dehydrogenase	1.2.1.12	Metabolism; Carbohydrate metabolism; Glycolysis / Gluconeogenesis [PATH:ko00010] Metabolism; Energy metabolism; Carbon fixation in photosynthetic organisms [PATH:ko00710] Metabolism; Global and overview maps; Metabolic pathways [PATH:ko01100] Metabolism; Global and overview maps; Biosynthesis of secondary metabolites [PATH:ko01110] Metabolism; Global and overview maps; Microbial metabolism in div…
Lacticaseibacillus_paracasei_ATCC334_GM000861	99.7	2.3e-220	lcl:LOCK919_1114	K00927	PGK, pgk	phosphoglycerate kinase	2.7.2.3	Metabolism; Carbohydrate metabolism; Glycolysis / Gluconeogenesis [PATH:ko00010] Metabolism; Energy metabolism; Carbon fixation in photosynthetic organisms [PATH:ko00710] Metabolism; Global and overview maps; Metabolic pathways [PATH:ko01100] Metabolism; Global and overview maps; Biosynthesis of secondary metabolites [PATH:ko01110] Metabolism; Global and overview maps; Microbial metabolism in div…
Lacticaseibacillus_paracasei_ATCC334_GM000862	100	1.3e-139	lpap:LBPC_0908	K01803	TPI, tpiA	triosephosphate isomerase (TIM)	5.3.1.1	Metabolism; Carbohydrate metabolism; Glycolysis / Gluconeogenesis [PATH:ko00010] Metabolism; Carbohydrate metabolism; Fructose and mannose metabolism [PATH:ko00051] Metabolism; Carbohydrate metabolism; Inositol phosphate metabolism [PATH:ko00562] Metabolism; Energy metabolism; Carbon fixation in photosynthetic organisms [PATH:ko00710] Metabolism; Global and overview maps; Metabolic pathways [PATH…
Lacticaseibacillus_paracasei_ATCC334_GM000863	100	3.5e-246	lpq:AF91_09065	K01689	ENO, eno	enolase	4.2.1.11	Metabolism; Carbohydrate metabolism; Glycolysis / Gluconeogenesis [PATH:ko00010] Metabolism; Energy metabolism; Methane metabolism [PATH:ko00680] Metabolism; Global and overview maps; Metabolic pathways [PATH:ko01100] Metabolism; Global and overview maps; Biosynthesis of secondary metabolites [PATH:ko01110] Metabolism; Global and overview maps; Microbial metabolism in diverse environments [PATH:k…
Lacticaseibacillus_paracasei_ATCC334_GM000864	100	2e-216	lca:LSEI_0971	K08217	mef	MFS transporter, DHA3 family, macrolide efflux protein	--
Lacticaseibacillus_paracasei_ATCC334_GM000865	100	1.4e-53	lca:LSEI_0972
Lacticaseibacillus_paracasei_ATCC334_GM000866	100	2.3e-278	lpq:AF91_09050
Lacticaseibacillus_paracasei_ATCC334_GM000867	100	2.3e-31	lca:LSEI_0974	K03075	secG	preprotein translocase subunit SecG	--	Cellular Processes; Cellular community - prokaryotes; Quorum sensing [PATH:ko02024] Genetic Information Processing; Folding, sorting and degradation; Protein export [PATH:ko03060] Environmental Information Processing; Membrane transport; Bacterial secretion system [PATH:ko03070]
Lacticaseibacillus_paracasei_ATCC334_GM000868	100	3.3e-140	lca:LSEI_0975	K03928	yvaK	carboxylesterase	3.1.1.1
Lacticaseibacillus_paracasei_ATCC334_GM000869	100	0	lca:LSEI_0976	K12573	rnr, vacB	ribonuclease R	3.1.-.-	Genetic Information Processing; Folding, sorting and degradation; RNA degradation [PATH:ko03018]
Lacticaseibacillus_paracasei_ATCC334_GM000870	100	1.5e-82	lpi:LBPG_03047	K03664	smpB	SsrA-binding protein	--
Lacticaseibacillus_paracasei_ATCC334_GM000871	100	1e-267	lca:LSEI_0230
Lacticaseibacillus_paracasei_ATCC334_GM000872	100	3.3e-177	lca:LSEI_0979
Lacticaseibacillus_paracasei_ATCC334_GM000873	100	0	lca:LSEI_0980	K01187	malZ	alpha-glucosidase	3.2.1.20	Metabolism; Carbohydrate metabolism; Galactose metabolism [PATH:ko00052] Metabolism; Carbohydrate metabolism; Starch and sucrose metabolism [PATH:ko00500] Metabolism; Global and overview maps; Metabolic pathways [PATH:ko01100]
Lacticaseibacillus_paracasei_ATCC334_GM000874	99.7	6.6e-233	lpq:AF91_09005	K01208	cd, ma, nplT	cyclomaltodextrinase / maltogenic alpha-amylase / neopullulanase	3.2.1.54 3.2.1.133 3.2.1.135	Metabolism; Carbohydrate metabolism; Starch and sucrose metabolism [PATH:ko00500] Metabolism; Global and overview maps; Metabolic pathways [PATH:ko01100]
Lacticaseibacillus_paracasei_ATCC334_GM000876	100	0	lca:LSEI_0982	K00691	mapA	maltose phosphorylase	2.4.1.8	Metabolism; Carbohydrate metabolism; Starch and sucrose metabolism [PATH:ko00500] Metabolism; Global and overview maps; Metabolic pathways [PATH:ko01100]
Lacticaseibacillus_paracasei_ATCC334_GM000877	100	3.7e-122	lca:LSEI_0983	K01838	pgmB	beta-phosphoglucomutase	5.4.2.6	Metabolism; Carbohydrate metabolism; Starch and sucrose metabolism [PATH:ko00500]
Lacticaseibacillus_paracasei_ATCC334_GM000878	95.3	3.6e-16	lpq:AF91_08990
Lacticaseibacillus_paracasei_ATCC334_GM000879	100	2.2e-34	lca:LSEI_0985
Lacticaseibacillus_paracasei_ATCC334_GM000880	100	2.3e-26	lca:LSEI_0986	K07729	K07729	putative transcriptional regulator	--
Lacticaseibacillus_paracasei_ATCC334_GM000881	99.8	4.2e-241	lca:LSEI_0987	K12574	rnj	ribonuclease J	3.1.-.-	Genetic Information Processing; Folding, sorting and degradation; RNA degradation [PATH:ko03018]
Lacticaseibacillus_paracasei_ATCC334_GM000882	100	1.5e-244	lca:LSEI_0988	K02027	ABC.MS.S	multiple sugar transport system substrate-binding protein	--
Lacticaseibacillus_paracasei_ATCC334_GM000883	100	6.8e-147	lpap:LBPC_0928	K02026	ABC.MS.P1	multiple sugar transport system permease protein	--
Lacticaseibacillus_paracasei_ATCC334_GM000884	100	1.6e-165	lpap:LBPC_0929	K02025	ABC.MS.P	multiple sugar transport system permease protein	--
Lacticaseibacillus_paracasei_ATCC334_GM000885	99.4	4.2e-197	lcb:LCABL_11570	K10112	msmX, msmK, malK, sugC, ggtA, msiK	multiple sugar transport system ATP-binding protein	--	Environmental Information Processing; Membrane transport; ABC transporters [PATH:ko02010]
Lacticaseibacillus_paracasei_ATCC334_GM000886	100	1.1e-123	lce:LC2W_1146
Lacticaseibacillus_paracasei_ATCC334_GM000887	100	5.5e-91	lpq:AF91_08945
Lacticaseibacillus_paracasei_ATCC334_GM000888	100	4.2e-158	lcz:LCAZH_0942
Lacticaseibacillus_paracasei_ATCC334_GM000889	99.6	2e-128	lcx:LCA12A_2286	K03648	UNG, UDG	uracil-DNA glycosylase	3.2.2.27	Genetic Information Processing; Replication and repair; Base excision repair [PATH:ko03410] Human Diseases; Immune diseases; Primary immunodeficiency [PATH:ko05340]
Lacticaseibacillus_paracasei_ATCC334_GM000890	99.7	2.3e-178	lca:LSEI_0996	K00625	E2.3.1.8, pta	phosphate acetyltransferase	2.3.1.8	Metabolism; Metabolism of other amino acids; Taurine and hypotaurine metabolism [PATH:ko00430] Metabolism; Carbohydrate metabolism; Pyruvate metabolism [PATH:ko00620] Metabolism; Carbohydrate metabolism; Propanoate metabolism [PATH:ko00640] Metabolism; Energy metabolism; Methane metabolism [PATH:ko00680] Metabolism; Energy metabolism; Carbon fixation pathways in prokaryotes [PATH:ko00720] Metabol…
Lacticaseibacillus_paracasei_ATCC334_GM000891	100	2.5e-82	lca:LSEI_0997	K06925	tsaE	tRNA threonylcarbamoyladenosine biosynthesis protein TsaE	--
Lacticaseibacillus_paracasei_ATCC334_GM000892	100	3.8e-167	lpap:LBPC_0937	K01990	ABC-2.A	ABC-2 type transport system ATP-binding protein	--
Lacticaseibacillus_paracasei_ATCC334_GM000893	100	9.5e-217	lca:LSEI_1000	K01992	ABC-2.P	ABC-2 type transport system permease protein	--
Lacticaseibacillus_paracasei_ATCC334_GM000894	100	2.6e-99	lcx:LCA12A_2292	K02342	dnaQ	DNA polymerase III subunit epsilon	2.7.7.7	Metabolism; Nucleotide metabolism; Purine metabolism [PATH:ko00230] Metabolism; Nucleotide metabolism; Pyrimidine metabolism [PATH:ko00240] Metabolism; Global and overview maps; Metabolic pathways [PATH:ko01100] Genetic Information Processing; Replication and repair; DNA replication [PATH:ko03030] Genetic Information Processing; Replication and repair; Mismatch repair [PATH:ko03430] Genetic Infor…
Lacticaseibacillus_paracasei_ATCC334_GM000895	100	3.7e-138	lcw:BN194_11390	K01142	E3.1.11.2, xthA	exodeoxyribonuclease III	3.1.11.2	Genetic Information Processing; Replication and repair; Base excision repair [PATH:ko03410]
Lacticaseibacillus_paracasei_ATCC334_GM000896	99.7	7.1e-169	lce:LC2W_1157	K00075	murB	UDP-N-acetylmuramate dehydrogenase	1.3.1.98	Metabolism; Carbohydrate metabolism; Amino sugar and nucleotide sugar metabolism [PATH:ko00520] Metabolism; Glycan biosynthesis and metabolism; Peptidoglycan biosynthesis [PATH:ko00550] Metabolism; Global and overview maps; Metabolic pathways [PATH:ko01100]
Lacticaseibacillus_paracasei_ATCC334_GM000897	100	0	lce:LC2W_1158	K03316	TC.CPA1	monovalent cation:H+ antiporter, CPA1 family	--
Lacticaseibacillus_paracasei_ATCC334_GM000898	100	1.8e-95	lpi:LBPG_00183
Lacticaseibacillus_paracasei_ATCC334_GM000899	100	1.9e-205	lcb:LCABL_11710	K11072	potA	spermidine/putrescine transport system ATP-binding protein	3.6.3.31	Environmental Information Processing; Membrane transport; ABC transporters [PATH:ko02010]
Lacticaseibacillus_paracasei_ATCC334_GM000900	100	6.4e-139	lpap:LBPC_0945	K11071	potB	spermidine/putrescine transport system permease protein	--	Environmental Information Processing; Membrane transport; ABC transporters [PATH:ko02010]
Lacticaseibacillus_paracasei_ATCC334_GM000901	100	4.5e-146	lca:LSEI_1008	K11070	potC	spermidine/putrescine transport system permease protein	--	Environmental Information Processing; Membrane transport; ABC transporters [PATH:ko02010]
Lacticaseibacillus_paracasei_ATCC334_GM000902	100	4e-208	lca:LSEI_1009	K11069	potD	spermidine/putrescine transport system substrate-binding protein	--	Environmental Information Processing; Membrane transport; ABC transporters [PATH:ko02010]
Lacticaseibacillus_paracasei_ATCC334_GM000903	100	0	lca:LSEI_1012
Lacticaseibacillus_paracasei_ATCC334_GM000904	100	7.2e-112	lca:LSEI_1013
Lacticaseibacillus_paracasei_ATCC334_GM000905	100	1.6e-191	lca:LSEI_1014	K01992	ABC-2.P	ABC-2 type transport system permease protein	--
Lacticaseibacillus_paracasei_ATCC334_GM000906	100	1.6e-131	lca:LSEI_1015	K01990	ABC-2.A	ABC-2 type transport system ATP-binding protein	--
Lacticaseibacillus_paracasei_ATCC334_GM000907	100	2.8e-151	lca:LSEI_1016	K18672	dacA	diadenylate cyclase	2.7.7.85
Lacticaseibacillus_paracasei_ATCC334_GM000908	100	1.2e-170	lca:LSEI_1017
Lacticaseibacillus_paracasei_ATCC334_GM000909	100	5.6e-255	lcz:LCAZH_0972	K03431	glmM	phosphoglucosamine mutase	5.4.2.10	Metabolism; Carbohydrate metabolism; Amino sugar and nucleotide sugar metabolism [PATH:ko00520] Metabolism; Global and overview maps; Metabolic pathways [PATH:ko01100] Metabolism; Global and overview maps; Biosynthesis of antibiotics [PATH:ko01130]
Lacticaseibacillus_paracasei_ATCC334_GM000910	100	0	lca:LSEI_1019	K00820	glmS, GFPT	glucosamine---fructose-6-phosphate aminotransferase (isomerizing)	2.6.1.16	Metabolism; Amino acid metabolism; Alanine, aspartate and glutamate metabolism [PATH:ko00250] Metabolism; Carbohydrate metabolism; Amino sugar and nucleotide sugar metabolism [PATH:ko00520] Metabolism; Global and overview maps; Metabolic pathways [PATH:ko01100] Metabolism; Global and overview maps; Biosynthesis of antibiotics [PATH:ko01130] Human Diseases; Endocrine and metabolic diseases; Insuli…
Lacticaseibacillus_paracasei_ATCC334_GM000911	100	4.6e-165	lpi:LBPG_00795
Lacticaseibacillus_paracasei_ATCC334_GM000912	99.7	1.1e-169	lcw:BN194_11580
Lacticaseibacillus_paracasei_ATCC334_GM000913	100	1e-66	lca:LSEI_1021
Lacticaseibacillus_paracasei_ATCC334_GM000914	100	1.2e-131	lca:LSEI_1022
Lacticaseibacillus_paracasei_ATCC334_GM000915	100	2.5e-152	lca:LSEI_1023	K02243	comGA	competence protein ComGA	--
Lacticaseibacillus_paracasei_ATCC334_GM000916	100	5e-170	lca:LSEI_1024	K02244	comGB	competence protein ComGB	--
[truncated: 1,740 more rows]

## Sheet: Zhang
Supplementary Table 5. The KEGG database annotation results of Zhang
[truncated: 2,543 more rows]

## Sheet: W56
Supplementary Table 5. The KEGG database annotation results of W56
[truncated: 2,929 more rows]

[truncated: 7 more sheets: BL23, N1115, LOCK919, BD-II, 12A, GG, ST-III]
