# Supplementary material for: Comparative genomic analysis of Lacticaseibacillus paracasei SMN-LBK from koumiss
Source: Front Microbiol. 2022 Oct 18;13:1042117. doi: 10.3389/fmicb.2022.1042117 (PMC9622802; doi:10.3389/fmicb.2022.1042117)
Supplement: Supplementary file 11 [file Table_6.XLSX]

## Sheet: Sheet1
Supplementary Table 6. Comparison of alcohol tolerance genes in 11 Lactobacillus strains
Gene	SMN-LBK	ATCC334	BD-II	BL23	LOCK919	N1115	W56	Zhang	12A	GG	ST-III
pfkA, PFK	1	1	1	1	1	1	1	1	1	1	1
glpK, GK	2	2	2	2	2	2	2	2	2	2	2
ldhA	2	2	2	2	2	2	2	2	2	2	2
LDH, ldh	3	3	3	3	3	3	3	3	3	3	5
hrcA	1	1	1	1	1	1	1	1	1	1	1
ctsR	1	1	1	1	1	1	1	1	1	1	1
clpP	1	1	1	1	1	1	1	1	1	1	1
clpX	1	1	1	1	1	1	1	1	1	1	1
clpB	1	1	1	1	1	1	1	1	1	1	1
clpQ	1	1	0	1	1	1	1	1	1	1	1
clpE	1	1	1	1	1	1	1	1	1	1	1
clpL	1	1	0	1	1	1	1	1	1	1	1
clpC	1	1	1	1	1	1	1	1	1	1	1
groEL, HSPD1	1	1	1	1	1	1	1	1	1	1	1
groES, HSPE1	1	1	1	1	1	1	1	1	1	1	1
dnaJ	1	1	1	1	1	1	1	1	1	1	1
dnaK, HSPA9	1	1	1	1	1	1	1	1	1	1	1
degP, htrA	1	1	1	1	1	1	1	1	1	1	1
tig	1	1	1	1	1	1	1	1	1	1	1
trxA	2	2	2	2	2	2	2	2	2	2	3
trxB, TRR	1	1	1	1	1	1	1	1	1	1	1
recA	2	2	2	2	2	2	2	2	2	2	1
UvrD	2	2	0	2	2	2	2	2	2	2	2
